# Supplementary material for: Responses to Telomere Erosion in Plants
Source: PubMed Central journal article supplement (PMC3897657; doi:10.1371/journal.pone.0086220), 2014-01-21

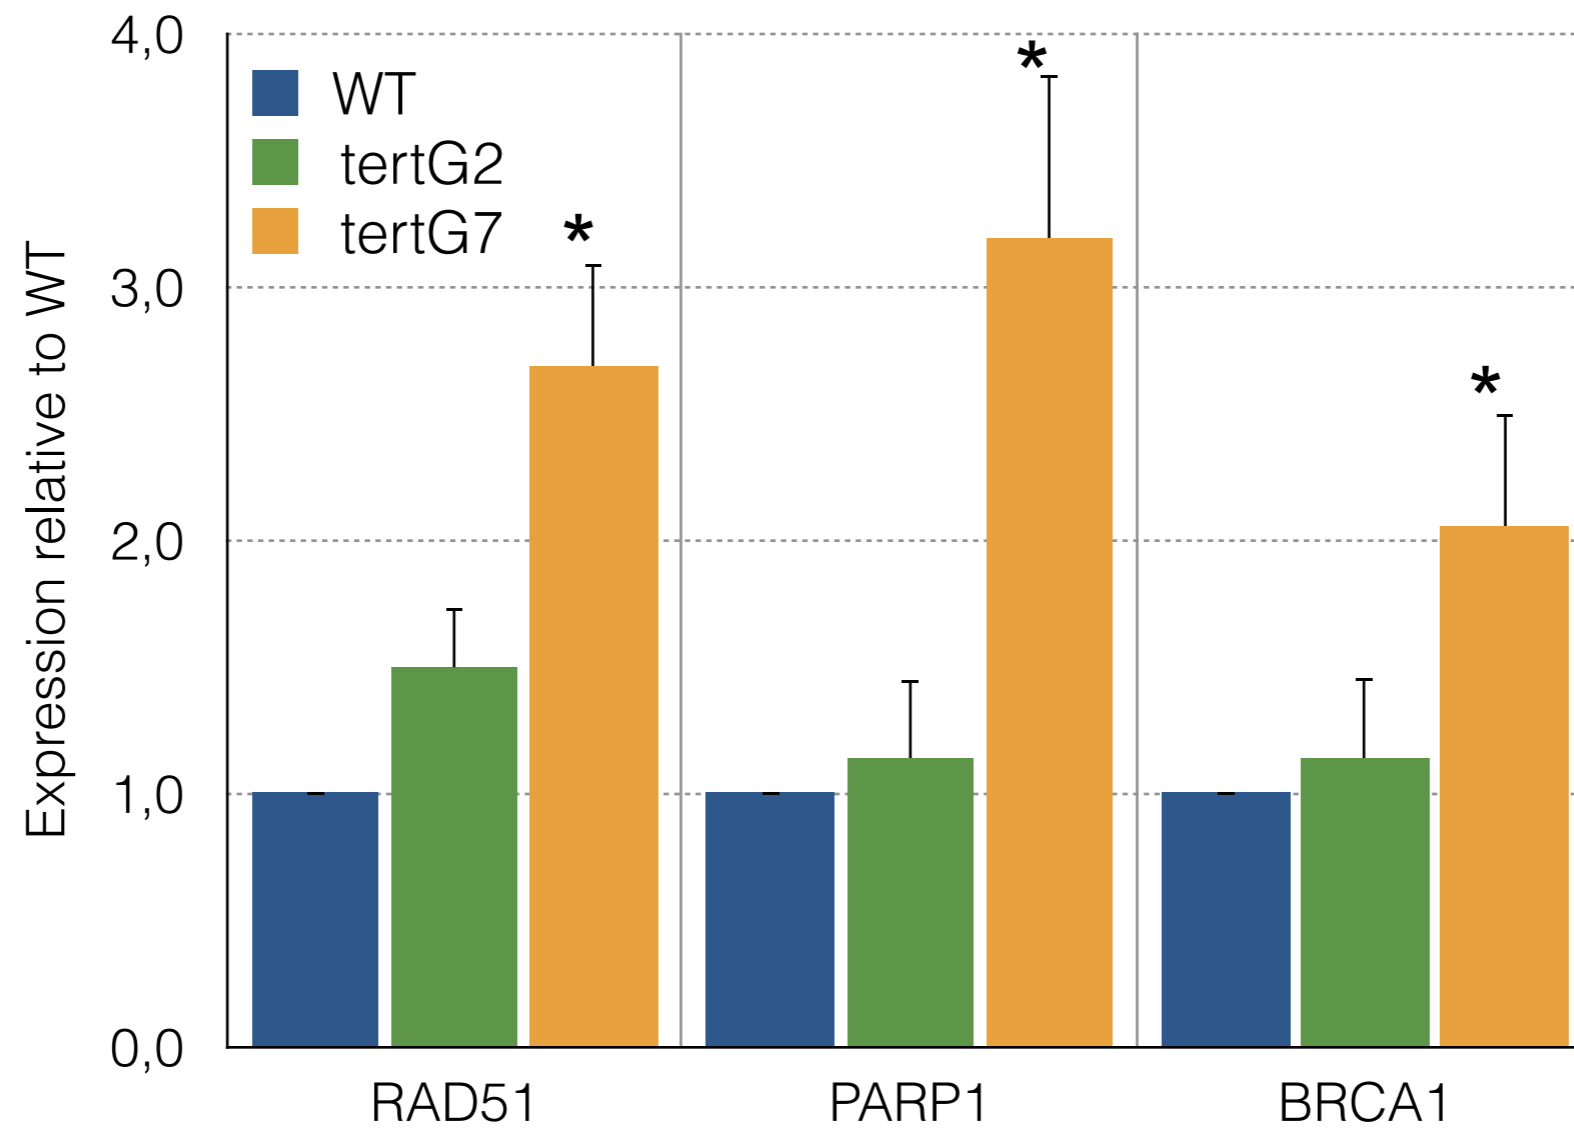

Supplement: pone.0086220.s001.pdf [file pone.0086220.s001.pdf]
