# Supplementary material for: Responses to Telomere Erosion in Plants
Source: PLoS One. 2014 Jan 21;9(1):e86220. doi: 10.1371/journal.pone.0086220 (PMC3897657; doi:10.1371/journal.pone.0086220)
Supplement: Table S1 — List of 18893 genes and transcription data from two independent RNA-seq experiments. (XLSX) [file pone.0086220.s002.xlsx]

## Sheet: supl table 1
			SET 1						SET 2
locus	Feature	Description	wt_raw_set1	tertG2_raw_set1	tertG7_raw_set1	wt_norm_set1	tertG2_norm_set1	tertG7_norm_set1	wt_raw	tertG2_raw	tertG7_raw	wt_norm	tertG2_norm	tertG7_norm
AT1G01010	ANAC001	NAC domain containing protein 1,[Source:TAIR;Acc:AT1G01010]	247	203	81	11.3104	10.6671	3.9445	164	105	41	8.4815	5.8361	2.1757
AT1G01020	ARV1	Arv1-like protein,[Source:TAIR;Acc:AT1G01020]	81	81	48	3.7091	4.2563	2.3375	115	102	90	5.9474	5.6694	4.7759
AT1G01030	NGA3	AP2/B3-like transcriptional factor family protein,[Source:TAIR;Acc:AT1G01030]	162	180	110	7.4182	9.4585	5.3567	110	94	58	5.6888	5.2247	3.0778
AT1G01040	DCL1	dicer-like 1,[Source:TAIR;Acc:AT1G01040]	290	327	217	13.2794	17.183	10.5673	1021	1004	679	52.8022	55.8044	36.0317
AT1G01040	DCL1	dicer-like 1,[Source:TAIR;Acc:AT1G01040]	877	849	605	40.1589	44.6127	29.4617	638	629	400	32.9949	34.9611	21.2264
AT1G01060	LHY	Homeodomain-like superfamily protein,[Source:TAIR;Acc:AT1G01060]	7562	6944	6442	346.273	364.889	313.707	5720	4572	3239	295.8167	254.1214	171.8804
AT1G01070	AT1G01070	nodulin MtN21 /EamA-like transporter family protein,[Source:TAIR;Acc:AT1G01070]	132	144	132	6.0444	7.5668	6.428	105	76	71	5.4302	4.2242	3.7677
AT1G01080	AT1G01080	RNA-binding (RRM/RBD/RNP motifs) family protein,[Source:TAIR;Acc:AT1G01080]	1121	872	857	51.3319	45.8213	41.7334	1078	954	1135	55.7501	53.0253	60.2298
AT1G01090	PDH-E1 ALPHA	pyruvate dehydrogenase E1 alpha,[Source:TAIR;Acc:AT1G01090]	4031	3569	2994	184.584	187.541	145.799	4867	4110	4457	251.7028	228.4425	236.5146
AT1G01100	AT1G01100	60S acidic ribosomal protein family,[Source:TAIR;Acc:AT1G01100]	2857	2822	2406	130.825	148.289	117.165	2922	2699	3291	151.1147	150.0161	174.6398
AT1G01110	IQD18	IQ-domain 18,[Source:TAIR;Acc:AT1G01110]	48	52	35	2.198	2.7325	1.7044	30	41	19	1.5515	2.2789	1.0083
AT1G01120	KCS1	3-ketoacyl-CoA synthase 1,[Source:TAIR;Acc:AT1G01120]	1875	1697	1625	85.8585	89.1728	79.1327	3101	3601	2858	160.3719	200.1512	151.6623
AT1G01130	AT1G01130	No description	62	36	36	2.8391	1.8917	1.7531	27	32	28	1.3963	1.7786	1.4858
AT1G01140	CIPK9	CBL-interacting protein kinase 9,[Source:TAIR;Acc:AT1G01140]	450	405	487	20.606	21.2817	23.7155	575	458	727	29.7368	25.4566	38.5789
AT1G01160	GIF2	GRF1-interacting factor 2,[Source:TAIR;Acc:AT1G01160]	583	511	514	26.6963	26.8517	25.0303	523	499	576	27.0476	27.7355	30.5659
AT1G01160	GIF2	GRF1-interacting factor 2,[Source:TAIR;Acc:AT1G01160]	543	503	526	24.8646	26.4313	25.6147	721	760	766	37.2874	42.2424	40.6485
AT1G01180	AT1G01180	S-adenosyl-L-methionine-dependent methyltransferases superfamily protein,[Source:TAIR;Acc:AT1G01180]	137	110	164	6.2734	5.7802	7.9863	246	203	189	12.7222	11.2832	10.0295
AT1G01200	ATRABA3	RAB GTPase homolog A3,[Source:TAIR;Acc:AT1G01200]	18	32	15	0.8242	1.6815	0.7305	21	22	20	1.086	1.2228	1.0613
AT1G01210	AT1G01210	DNA-directed RNA polymerase, subunit M, archaeal,[Source:TAIR;Acc:AT1G01210]	191	172	164	8.7461	9.0381	7.9863	90	79	87	4.6545	4.391	4.6167
AT1G01220	FKGP	L-fucokinase/GDP-L-fucose pyrophosphorylase,[Source:TAIR;Acc:AT1G01220]	382	424	442	17.4922	22.2801	21.5241	487	504	545	25.1858	28.0134	28.9209
AT1G01225	AT1G01225	NC domain-containing protein-related,[Source:TAIR;Acc:AT1G01225]	22	27	7	1.0074	1.4188	0.3409	45	41	21	2.3272	2.2789	1.1144
AT1G01230	AT1G01230	ORMDL family protein,[Source:TAIR;Acc:AT1G01230]	121	143	146	5.5407	7.5143	7.1098	273	208	268	14.1185	11.5611	14.2217
AT1G01240	AT1G01240	unknown protein,[Source:TAIR;Acc:AT1G01240]	113	88	112	5.1744	4.6242	5.4541	220	214	189	11.3776	11.8946	10.0295
AT1G01250	AT1G01250	Integrase-type DNA-binding superfamily protein,[Source:TAIR;Acc:AT1G01250]	24	29	33	1.099	1.5239	1.607	43	52	25	2.2238	2.8903	1.3266
AT1G01260	AT1G01260	basic helix-loop-helix (bHLH) DNA-binding superfamily protein,[Source:TAIR;Acc:AT1G01260]	236	228	209	10.8067	11.9808	10.1777	246	216	236	12.7222	12.0057	12.5235
AT1G01290	CNX3	cofactor of nitrate reductase and xanthine dehydrogenase 3,[Source:TAIR;Acc:AT1G01290]	214	180	207	9.7993	9.4585	10.0803	166	136	220	8.5849	7.5592	11.6745
AT1G01300	AT1G01300	Eukaryotic aspartyl protease family protein,[Source:TAIR;Acc:AT1G01300]	747	632	736	34.206	33.2099	35.841	421	370	493	21.7725	20.5654	26.1615
AT1G01310	AT1G01310	CAP (Cysteine-rich secretory proteins, Antigen 5, and Pathogenesis-related 1 protein) superfamily protein,[Source:TAIR;Acc:AT1G01310]	10925	10400	10418	500.269	546.492	507.326	9183	8722	9187	474.9099	484.7872	487.5163
AT1G01340	CNGC10	cyclic nucleotide gated channel 10,[Source:TAIR;Acc:AT1G01340]	138	131	134	6.3192	6.8837	6.5254	139	102	87	7.1886	5.6694	4.6167
AT1G01350	AT1G01350	Zinc finger (CCCH-type/C3HC4-type RING finger) family protein,[Source:TAIR;Acc:AT1G01350]	337	404	391	15.4316	21.2291	19.0406	252	218	289	13.0325	12.1169	15.336
AT1G01360	RCAR1	regulatory component of ABA receptor 1,[Source:TAIR;Acc:AT1G01360]	132	127	120	6.0444	6.6735	5.8437	132	111	119	6.8265	6.1696	6.3148
AT1G01390	AT1G01390	UDP-Glycosyltransferase superfamily protein,[Source:TAIR;Acc:AT1G01390]	83	73	44	3.8007	3.836	2.1427	61	56	15	3.1547	3.1126	0.796
AT1G01420	UGT72B3	UDP-glucosyl transferase 72B3,[Source:TAIR;Acc:AT1G01420]	227	231	247	10.3946	12.1384	12.0282	76	99	72	3.9304	5.5026	3.8207
AT1G01430	TBL25	TRICHOME BIREFRINGENCE-LIKE 25,[Source:TAIR;Acc:AT1G01430]	863	1006	1435	39.5178	52.8626	69.8803	2559	2656	2451	132.3418	147.6261	130.0645
AT1G01440	AT1G01440	Protein of unknown function (DUF3133),[Source:TAIR;Acc:AT1G01440]	227	223	230	10.3946	11.7181	11.2003	392	332	390	20.2728	18.4533	20.6957
AT1G01448	AT1G01448	other RNA,[Source:TAIR;Acc:AT1G01448]	79	53	55	3.6175	2.785	2.6783	108	80	144	5.5853	4.4466	7.6415
AT1G01448	AT1G01448	other RNA,[Source:TAIR;Acc:AT1G01448]	126	94	100	5.7697	4.9395	4.8697	211	152	244	10.9121	8.4485	12.9481
AT1G01470	LEA14	Late embryogenesis abundant protein,[Source:TAIR;Acc:AT1G01470]	522	516	532	23.903	27.1144	25.9068	433	377	399	22.3931	20.9545	21.1733
AT1G01490	AT1G01490	Heavy metal transport/detoxification superfamily protein,[Source:TAIR;Acc:AT1G01490]	1398	1437	1535	64.0161	75.5105	74.75	1061	1076	1216	54.8709	59.8064	64.5281
AT1G01500	AT1G01500	Erythronate-4-phosphate dehydrogenase family protein,[Source:TAIR;Acc:AT1G01500]	118	123	134	5.4034	6.4633	6.5254	117	94	168	6.0508	5.2247	8.9151
AT1G01510	AN	NAD(P)-binding Rossmann-fold superfamily protein,[Source:TAIR;Acc:AT1G01510]	499	500	445	22.8498	26.2737	21.6702	532	512	558	27.513	28.458	29.6108
AT1G01520	AT1G01520	Homeodomain-like superfamily protein,[Source:TAIR;Acc:AT1G01520]	244	194	213	11.173	10.1942	10.3725	57	64	21	2.9478	3.5573	1.1144
AT1G01540	AT1G01540	Protein kinase superfamily protein,[Source:TAIR;Acc:AT1G01540]	810	680	724	37.0909	35.7322	35.2567	1543	1183	1327	79.7981	65.7536	70.4184
AT1G01550	BPS1	Protein of unknown function (DUF793),[Source:TAIR;Acc:AT1G01550]	1377	1348	1411	63.0545	70.8338	68.7116	2107	1974	2251	108.966	109.7191	119.4513
AT1G01570	AT1G01570	Protein of unknown function (DUF604),[Source:TAIR;Acc:AT1G01570]	38	35	31	1.7401	1.8392	1.5096	49	42	20	2.5341	2.3344	1.0613
AT1G01580	FRO2	ferric reduction oxidase 2,[Source:TAIR;Acc:AT1G01580]	410	658	595	18.7744	34.5761	28.9748	1161	1927	207	60.0425	107.1067	10.9846
AT1G01600	CYP86A4	cytochrome P450, family 86, subfamily A, polypeptide 4,[Source:TAIR;Acc:AT1G01600]	103	126	114	4.7165	6.621	5.5515	55	55	35	2.8444	3.057	1.8573
AT1G01610	ATGPAT4	glycerol-3-phosphate acyltransferase 4,[Source:TAIR;Acc:AT1G01610]	1533	1374	1224	70.1979	72.2	59.6052	1991	1694	1714	102.967	94.1561	90.9549
AT1G01620	PIP1C	plasma membrane intrinsic protein 1C,[Source:TAIR;Acc:AT1G01620]	5733	3986	4263	262.521	209.454	207.596	12439	9726	7565	643.2978	540.5916	401.4434
AT1G01630	AT1G01630	Sec14p-like phosphatidylinositol transfer family protein,[Source:TAIR;Acc:AT1G01630]	396	459	548	18.1333	24.1192	26.686	636	702	788	32.8915	39.0186	41.8159
AT1G01640	AT1G01640	BTB/POZ domain-containing protein,[Source:TAIR;Acc:AT1G01640]	56	43	34	2.5643	2.2595	1.6557	50	40	36	2.5858	2.2233	1.9104
AT1G01650	SPPL4	SIGNAL PEPTIDE PEPTIDASE-LIKE 4,[Source:TAIR;Acc:AT1G01650]	222	195	237	10.1656	10.2467	11.5412	243	285	285	12.567	15.8409	15.1238
AT1G01660	AT1G01660	RING/U-box superfamily protein,[Source:TAIR;Acc:AT1G01660]	16	24	18	0.7327	1.2611	0.8765	9	11	21	0.4654	0.6114	1.1144
AT1G01690	ATPRD3	putative recombination initiation defects 3,[Source:TAIR;Acc:AT1G01690]	34	29	25	1.5569	1.5239	1.2174	34	27	39	1.7584	1.5007	2.0696
AT1G01710	AT1G01710	Acyl-CoA thioesterase family protein,[Source:TAIR;Acc:AT1G01710]	136	109	117	6.2276	5.7277	5.6976	297	290	345	15.3597	16.1188	18.3077
AT1G01720	ATAF1	NAC (No Apical Meristem) domain transcriptional regulator superfamily protein,[Source:TAIR;Acc:AT1G01720]	1037	755	907	47.4855	39.6732	44.1682	942	966	1211	48.7167	53.6923	64.2628
AT1G01720	ATAF1	NAC (No Apical Meristem) domain transcriptional regulator superfamily protein,[Source:TAIR;Acc:AT1G01720]	78	73	55	3.5717	3.836	2.6783	96	55	89	4.9648	3.057	4.7229
AT1G01730	AT1G01730	unknown protein,[Source:TAIR;Acc:AT1G01730]	297	279	295	13.6	14.6607	14.3656	231	212	267	11.9464	11.7834	14.1686
AT1G01740	AT1G01740	Protein kinase protein with tetratricopeptide repeat domain,[Source:TAIR;Acc:AT1G01740]	60	88	75	2.7475	4.6242	3.6523	70	64	71	3.6201	3.5573	3.7677
AT1G01750	ADF11	actin depolymerizing factor 11,[Source:TAIR;Acc:AT1G01750]	32	33	26	1.4653	1.7341	1.2661	42	37	47	2.1721	2.0565	2.4941
AT1G01750	ADF11	actin depolymerizing factor 11,[Source:TAIR;Acc:AT1G01750]	76	96	63	3.4801	5.0445	3.0679	139	124	60	7.1886	6.8922	3.184
AT1G01770	AT1G01770	unknown protein,[Source:TAIR;Acc:AT1G01770]	266	180	234	12.1805	9.4585	11.3951	256	276	403	13.2393	15.3407	21.3856
AT1G01770	AT1G01770	unknown protein,[Source:TAIR;Acc:AT1G01770]	97	76	77	4.4417	3.9936	3.7497	215	170	195	11.119	9.449	10.3478
AT1G01790	KEA1	K+ efflux antiporter 1,[Source:TAIR;Acc:AT1G01790]	1021	1058	887	46.7528	55.5951	43.1943	2321	2385	1622	120.0333	132.5633	86.0729
AT1G01800	AT1G01800	NAD(P)-binding Rossmann-fold superfamily protein,[Source:TAIR;Acc:AT1G01800]	590	640	680	27.0168	33.6303	33.114	910	809	915	47.0617	44.9659	48.5553
AT1G01820	PEX11C	peroxin 11c,[Source:TAIR;Acc:AT1G01820]	236	217	213	10.8067	11.4028	10.3725	285	240	296	14.7391	13.3397	15.7075
AT1G01830	AT1G01830	ARM repeat superfamily protein,[Source:TAIR;Acc:AT1G01830]	358	262	345	16.3932	13.7674	16.8005	123	134	167	6.3611	7.448	8.862
AT1G01840	AT1G01840	unknown protein,[Source:TAIR;Acc:AT1G01840]	71	104	85	3.2512	5.4649	4.1393	201	216	244	10.395	12.0057	12.9481
AT1G01840	AT1G01840	unknown protein,[Source:TAIR;Acc:AT1G01840]	47	63	58	2.1522	3.3105	2.8244	72	67	75	3.7236	3.724	3.9799
AT1G01880	AT1G01880	5'-3' exonuclease family protein,[Source:TAIR;Acc:AT1G01880]	24	20	25	1.099	1.051	1.2174	18	12	10	0.9309	0.667	0.5307
AT1G01900	ATSBT1,1	subtilase family protein,[Source:TAIR;Acc:AT1G01900]	678	598	498	31.0464	31.4233	24.2511	508	452	533	26.2718	25.1231	28.2841
AT1G01900	ATSBT1,1	subtilase family protein,[Source:TAIR;Acc:AT1G01900]	159	178	195	7.2808	9.3534	9.4959	159	126	145	8.2229	7.0033	7.6946
AT1G01920	AT1G01920	SET domain-containing protein,[Source:TAIR;Acc:AT1G01920]	106	105	95	4.8539	5.5175	4.6262	97	107	128	5.0165	5.9473	6.7924
AT1G01930	AT1G01930	zinc finger protein-related,[Source:TAIR;Acc:AT1G01930]	240	209	192	10.9899	10.9824	9.3498	304	236	337	15.7217	13.1174	17.8832
AT1G01940	AT1G01940	Cyclophilin-like peptidyl-prolyl cis-trans isomerase family protein,[Source:TAIR;Acc:AT1G01940]	74	87	88	3.3886	4.5716	4.2853	109	97	180	5.6371	5.3915	9.5519
AT1G01950	ARK2	armadillo repeat kinesin 2,[Source:TAIR;Acc:AT1G01950]	1564	1505	1551	71.6174	79.0837	75.5292	1735	1607	2013	89.7276	89.3205	106.8216
AT1G01950	ARK2	armadillo repeat kinesin 2,[Source:TAIR;Acc:AT1G01950]	220	235	260	10.0741	12.3486	12.6612	374	369	404	19.3419	20.5098	21.4386
AT1G01970	AT1G01970	Tetratricopeptide repeat (TPR)-like superfamily protein,[Source:TAIR;Acc:AT1G01970]	604	571	491	27.6579	30.0045	23.9103	756	675	874	39.0974	37.5179	46.3796
AT1G01990	AT1G01990	unknown protein,[Source:TAIR;Acc:AT1G01990]	603	459	572	27.6121	24.1192	27.8547	367	355	270	18.9798	19.7316	14.3278
AT1G02000	GAE2	UDP-D-glucuronate 4-epimerase 2,[Source:TAIR;Acc:AT1G02000]	341	300	283	15.6148	15.7642	13.7813	349	278	263	18.049	15.4518	13.9563
AT1G02010	SEC1A	secretory 1A,[Source:TAIR;Acc:AT1G02010]	107	83	83	4.8997	4.3614	4.0419	114	94	85	5.8956	5.2247	4.5106
AT1G02020	AT1G02020	nitroreductase family protein,[Source:TAIR;Acc:AT1G02020]	400	338	346	18.3165	17.761	16.8492	361	377	333	18.6695	20.9545	17.6709
AT1G02050	LAP6	Chalcone and stilbene synthase family protein,[Source:TAIR;Acc:AT1G02050]	150	132	134	6.8687	6.9363	6.5254	122	81	160	6.3094	4.5022	8.4905
AT1G02060	AT1G02060	Tetratricopeptide repeat (TPR)-like superfamily protein,[Source:TAIR;Acc:AT1G02060]	217	201	195	9.9367	10.562	9.4959	164	118	194	8.4815	6.5587	10.2948
AT1G02080	AT1G02080	transcription regulators,[Source:TAIR;Acc:AT1G02080]	953	896	1100	43.639	47.0824	53.5668	1675	1728	2129	86.6246	96.0459	112.9773
AT1G02090	FUS5	Proteasome component (PCI) domain protein,[Source:TAIR;Acc:AT1G02090]	319	390	401	14.6074	20.4935	19.5275	394	376	443	20.3762	20.8989	23.5082
AT1G02100	AT1G02100	Leucine carboxyl methyltransferase,[Source:TAIR;Acc:AT1G02100]	225	224	255	10.303	11.7706	12.4178	488	348	477	25.2375	19.3426	25.3124
AT1G02110	AT1G02110	Protein of unknown function (DUF630 and DUF632),[Source:TAIR;Acc:AT1G02110]	782	633	566	35.8087	33.2625	27.5625	655	535	661	33.8741	29.7364	35.0765
AT1G02120	VAD1	GRAM domain family protein,[Source:TAIR;Acc:AT1G02120]	903	685	780	41.3494	35.9949	37.9837	726	619	722	37.546	34.4053	38.3136
AT1G02130	ATRAB1B	RAS 5,[Source:TAIR;Acc:AT1G02130]	223	218	183	10.2114	11.4553	8.9116	444	424	417	22.962	23.5668	22.1285
AT1G02140	MEE63	mago nashi family protein,[Source:TAIR;Acc:AT1G02140]	1625	1469	1656	74.4107	77.192	80.6424	1236	1126	1449	63.9212	62.5855	76.8925
AT1G02145	ALG12	homolog of asparagine-linked glycosylation 12,[Source:TAIR;Acc:AT1G02145]	65	47	63	2.9764	2.4697	3.0679	158	136	184	8.1712	7.5592	9.7641
AT1G02150	AT1G02150	Tetratricopeptide repeat (TPR)-like superfamily protein,[Source:TAIR;Acc:AT1G02150]	2714	2084	2150	124.277	109.509	104.699	2434	2292	3050	125.8772	127.3942	161.8509
AT1G02160	AT1G02160	Cox19 family protein (CHCH motif),[Source:TAIR;Acc:AT1G02160]	133	141	117	6.0902	7.4092	5.6976	122	105	150	6.3094	5.8361	7.9599
AT1G02170	LOL3	metacaspase 1,[Source:TAIR;Acc:AT1G02170]	433	342	366	19.8276	17.9712	17.8231	472	412	500	24.41	22.8998	26.5329
AT1G02170	LOL3	metacaspase 1,[Source:TAIR;Acc:AT1G02170]	113	101	91	5.1744	5.3073	4.4314	73	70	53	3.7753	3.8907	2.8125
AT1G02205	CER1	Fatty acid hydroxylase superfamily,[Source:TAIR;Acc:AT1G02205]	55	22	84	2.5185	1.156	4.0906	81	51	67	4.189	2.8347	3.5554
AT1G02220	ANAC003	NAC domain containing protein 3,[Source:TAIR;Acc:AT1G02220]	292	341	231	13.371	17.9186	11.249	178	201	209	9.2055	11.172	11.0908
AT1G02260	AT1G02260	Divalent ion symporter,[Source:TAIR;Acc:AT1G02260]	186	148	154	8.5172	7.777	7.4994	139	119	139	7.1886	6.6143	7.3762
AT1G02270	AT1G02270	Calcium-binding endonuclease/exonuclease/phosphatase family,[Source:TAIR;Acc:AT1G02270]	111	130	131	5.0828	6.8312	6.3793	157	170	203	8.1194	9.449	10.7724
AT1G02280	TOC33	translocon at the outer envelope membrane of chloroplasts 33,[Source:TAIR;Acc:AT1G02280]	813	762	621	37.2282	40.0411	30.2409	1126	1130	1573	58.2324	62.8078	83.4726
AT1G02290	AT1G02290	unknown protein,[Source:TAIR;Acc:AT1G02290]	113	156	128	5.1744	8.1974	6.2332	115	100	127	5.9474	5.5582	6.7394
AT1G02300	AT1G02300	Cysteine proteinases superfamily protein,[Source:TAIR;Acc:AT1G02300]	26	37	52	1.1906	1.9443	2.5323	50	56	82	2.5858	3.1126	4.3514
AT1G02305	AT1G02305	Cysteine proteinases superfamily protein,[Source:TAIR;Acc:AT1G02305]	531	501	562	24.3151	26.3262	27.3678	852	747	937	44.0622	41.5198	49.7227
AT1G02330	AT1G02330	No description	269	302	249	12.3178	15.8693	12.1256	219	212	294	11.3258	11.7834	15.6014
AT1G02335	GL22	germin-like protein subfamily 2 member 2 precursor,[Source:TAIR;Acc:AT1G02335]	122	110	88	5.5865	5.7802	4.2853	185	141	87	9.5675	7.8371	4.6167
AT1G02340	HFR1	basic helix-loop-helix (bHLH) DNA-binding superfamily protein,[Source:TAIR;Acc:AT1G02340]	87	51	74	3.9838	2.6799	3.6036	56	169	61	2.8961	9.3934	3.237
AT1G02350	AT1G02350	protoporphyrinogen oxidase-related,[Source:TAIR;Acc:AT1G02350]	24	10	20	1.099	0.5255	0.9739	22	21	23	1.1378	1.1672	1.2205
AT1G02360	AT1G02360	Chitinase family protein,[Source:TAIR;Acc:AT1G02360]	219	198	192	10.0283	10.4044	9.3498	193	279	143	9.9812	15.5074	7.5884
AT1G02370	AT1G02370	Tetratricopeptide repeat (TPR)-like superfamily protein,[Source:TAIR;Acc:AT1G02370]	222	264	193	10.1656	13.8725	9.3985	90	85	93	4.6545	4.7245	4.9351
AT1G02380	AT1G02380	unknown protein,[Source:TAIR;Acc:AT1G02380]	27	24	40	1.2364	1.2611	1.9479	91	77	85	4.7062	4.2798	4.5106
AT1G02400	ATGA2OX4	gibberellin 2-oxidase 6,[Source:TAIR;Acc:AT1G02400]	59	60	52	2.7017	3.1528	2.5323	74	78	46	3.827	4.3354	2.441
AT1G02410	AT1G02410	cytochrome c oxidase assembly protein CtaG / Cox11 family,[Source:TAIR;Acc:AT1G02410]	131	153	133	5.9987	8.0397	6.4767	207	197	213	10.7053	10.9497	11.303
AT1G02420	AT1G02420	Pentatricopeptide repeat (PPR) superfamily protein,[Source:TAIR;Acc:AT1G02420]	45	39	45	2.0606	2.0494	2.1914	30	31	45	1.5515	1.723	2.388
AT1G02420	AT1G02420	Pentatricopeptide repeat (PPR) superfamily protein,[Source:TAIR;Acc:AT1G02420]	129	137	137	5.9071	7.199	6.6715	70	57	88	3.6201	3.1682	4.6698
AT1G02460	AT1G02460	Pectin lyase-like superfamily protein,[Source:TAIR;Acc:AT1G02460]	42	73	45	1.9232	3.836	2.1914	24	27	17	1.2412	1.5007	0.9021
AT1G02475	AT1G02475	Polyketide cyclase/dehydrase and lipid transport superfamily protein,[Source:TAIR;Acc:AT1G02475]	200	218	198	9.1582	11.4553	9.642	497	530	612	25.703	29.4585	32.4763
AT1G02500	SAM1	S-adenosylmethionine synthetase 1,[Source:TAIR;Acc:AT1G02500]	9339	9477	7982	427.644	497.991	388.7	13571	12304	13203	701.8406	683.8823	700.6288
AT1G02520	PGP11	P-glycoprotein 11,[Source:TAIR;Acc:AT1G02520]	233	225	240	10.6693	11.8231	11.6873	197	250	140	10.1881	13.8955	7.4292
AT1G02560	CLPP5	nuclear encoded CLP protease 5,[Source:TAIR;Acc:AT1G02560]	1522	1542	1450	69.6942	81.028	70.6108	3704	3182	4445	191.5568	176.8623	235.8778
AT1G02610	AT1G02610	RING/FYVE/PHD zinc finger superfamily protein,[Source:TAIR;Acc:AT1G02610]	17	30	84	0.7785	1.5764	4.0906	111	106	152	5.7405	5.8917	8.066
AT1G02640	BXL2	beta-xylosidase 2,[Source:TAIR;Acc:AT1G02640]	552	443	606	25.2767	23.2785	29.5104	1680	993	1927	86.8832	55.193	102.258
AT1G02650	AT1G02650	Tetratricopeptide repeat (TPR)-like superfamily protein,[Source:TAIR;Acc:AT1G02650]	19	31	75	0.87	1.629	3.6523	27	18	62	1.3963	1.0005	3.2901
AT1G02660	AT1G02660	alpha/beta-Hydrolases superfamily protein,[Source:TAIR;Acc:AT1G02660]	62	98	207	2.8391	5.1496	10.0803	672	390	669	34.7533	21.677	35.5011
AT1G02670	AT1G02670	P-loop containing nucleoside triphosphate hydrolases superfamily protein,[Source:TAIR;Acc:AT1G02670]	15	13	23	0.6869	0.6831	1.12	21	17	33	1.086	0.9449	1.7512
AT1G02680	TAF13	TBP-associated factor 13,[Source:TAIR;Acc:AT1G02680]	72	86	67	3.297	4.5191	3.2627	90	92	115	4.6545	5.1136	6.1026
AT1G02690	IMPA-6	importin alpha isoform 6,[Source:TAIR;Acc:AT1G02690]	218	180	188	9.9825	9.4585	9.1551	149	168	172	7.7057	9.3378	9.1273
AT1G02700	AT1G02700	unknown protein,[Source:TAIR;Acc:AT1G02700]	28	34	30	1.2822	1.7866	1.4609	45	29	13	2.3272	1.6119	0.6899
AT1G02710	AT1G02710	glycine-rich protein,[Source:TAIR;Acc:AT1G02710]	45	56	33	2.0606	2.9427	1.607	118	108	69	6.1025	6.0029	3.6615
AT1G02720	GATL5	galacturonosyltransferase 5,[Source:TAIR;Acc:AT1G02720]	194	147	169	8.8835	7.7245	8.2298	162	158	149	8.378	8.782	7.9068
AT1G02730	ATCSLD5	cellulose synthase-like D5,[Source:TAIR;Acc:AT1G02730]	1013	868	721	46.3865	45.6111	35.1106	429	569	343	22.1863	31.6262	18.2016
AT1G02740	AT1G02740	MRG family protein,[Source:TAIR;Acc:AT1G02740]	59	76	79	2.7017	3.9936	3.8471	110	81	92	5.6888	4.5022	4.8821
AT1G02750	AT1G02750	Drought-responsive family protein,[Source:TAIR;Acc:AT1G02750]	120	112	152	5.4949	5.8853	7.402	184	137	247	9.5158	7.6147	13.1073
AT1G02770	AT1G02770	Protein of unknown function (DUF626),[Source:TAIR;Acc:AT1G02770]	23	27	33	1.0532	1.4188	1.607	29	22	33	1.4998	1.2228	1.7512
AT1G02780	emb2386	Ribosomal protein L19e family protein,[Source:TAIR;Acc:AT1G02780]	7322	7947	6708	335.283	417.594	326.66	6906	6641	7709	357.1521	369.1208	409.0849
AT1G02800	ATCEL2	cellulase 2,[Source:TAIR;Acc:AT1G02800]	23	9	6	1.0532	0.4729	0.2922	8	23	2	0.4137	1.2784	0.1061
AT1G02810	AT1G02810	Plant invertase/pectin methylesterase inhibitor superfamily,[Source:TAIR;Acc:AT1G02810]	95	111	125	4.3502	5.8328	6.0871	189	183	106	9.7744	10.1715	5.625
AT1G02816	AT1G02816	Protein of unknown function, DUF538,[Source:TAIR;Acc:AT1G02816]	277	279	244	12.6842	14.6607	11.8821	421	298	338	21.7725	16.5635	17.9363
AT1G02820	AT1G02820	Late embryogenesis abundant 3 (LEA3) family protein,[Source:TAIR;Acc:AT1G02820]	671	435	777	30.7259	22.8581	37.8376	697	630	306	36.0462	35.0167	16.2382
AT1G02840	SR1	RNA-binding (RRM/RBD/RNP motifs) family protein,[Source:TAIR;Acc:AT1G02840]	888	752	697	40.6626	39.5156	33.9419	927	732	984	47.9409	40.6861	52.2168
AT1G02850	BGLU11	beta glucosidase 11,[Source:TAIR;Acc:AT1G02850]	1734	2051	1743	79.4019	107.775	84.879	820	512	1578	42.4073	28.458	83.738
AT1G02860	NLA	SPX (SYG1/Pho81/XPR1) domain-containing protein,[Source:TAIR;Acc:AT1G02860]	245	271	234	11.2188	14.2403	11.3951	173	169	265	8.9469	9.3934	14.0625
AT1G02860	NLA	SPX (SYG1/Pho81/XPR1) domain-containing protein,[Source:TAIR;Acc:AT1G02860]	99	102	124	4.5333	5.3598	6.0384	277	175	341	14.3254	9.7269	18.0955
AT1G02880	TPK1	thiamin pyrophosphokinase1,[Source:TAIR;Acc:AT1G02880]	145	119	128	6.6397	6.2531	6.2332	156	136	92	8.0677	7.5592	4.8821
AT1G02890	AT1G02890	AAA-type ATPase family protein,[Source:TAIR;Acc:AT1G02890]	874	793	887	40.0215	41.67	43.1943	1392	1237	1511	71.989	68.7551	80.1825
AT1G02900	RALFL1	rapid alkalinization factor 1,[Source:TAIR;Acc:AT1G02900]	342	318	212	15.6606	16.71	10.3238	461	464	194	23.8412	25.7901	10.2948
AT1G02910	LPA1	tetratricopeptide repeat (TPR)-containing protein,[Source:TAIR;Acc:AT1G02910]	811	594	722	37.1366	31.2131	35.1593	804	747	890	41.5798	41.5198	47.2286
AT1G02920	ATGSTF7	glutathione S-transferase 7,[Source:TAIR;Acc:AT1G02920]	2390	3764	2494	109.441	197.788	121.451	352	318	637	18.2041	17.6751	33.803
AT1G02930	GSTF6	glutathione S-transferase 6,[Source:TAIR;Acc:AT1G02930]	4518	7203	4795	206.885	378.498	233.502	346	394	640	17.8938	21.8994	33.9622
AT1G02950	ATGSTF4	glutathione S-transferase F4,[Source:TAIR;Acc:AT1G02950]	38	67	51	1.7401	3.5207	2.4836	64	57	47	3.3098	3.1682	2.4941
AT1G02950	ATGSTF4	glutathione S-transferase F4,[Source:TAIR;Acc:AT1G02950]	31	59	42	1.4195	3.1003	2.0453	53	39	36	2.741	2.1677	1.9104
AT1G02960	AT1G02960	unknown protein,[Source:TAIR;Acc:AT1G02960]	85	67	74	3.8923	3.5207	3.6036	118	82	144	6.1025	4.5577	7.6415
AT1G02970	WEE1	WEE1 kinase homolog,[Source:TAIR;Acc:AT1G02970]	34	37	67	1.5569	1.9443	3.2627	50	38	73	2.5858	2.1121	3.8738
AT1G02990	AT1G02990	No description	309	342	332	14.1495	17.9712	16.1674	338	355	360	17.4801	19.7316	19.1037
AT1G03000	PEX6	peroxin 6,[Source:TAIR;Acc:AT1G03000]	307	251	256	14.0579	13.1894	12.4665	379	344	458	19.6004	19.1202	24.3042
AT1G03030	AT1G03030	P-loop containing nucleoside triphosphate hydrolases superfamily protein,[Source:TAIR;Acc:AT1G03030]	166	142	176	7.6013	7.4617	8.5707	158	130	240	8.1712	7.2257	12.7358
AT1G03040	AT1G03040	basic helix-loop-helix (bHLH) DNA-binding superfamily protein,[Source:TAIR;Acc:AT1G03040]	456	364	367	20.8808	19.1272	17.8718	468	415	543	24.2032	23.0666	28.8148
AT1G03050	AT1G03050	ENTH/ANTH/VHS superfamily protein,[Source:TAIR;Acc:AT1G03050]	57	44	43	2.6101	2.3121	2.094	94	137	64	4.8613	7.6147	3.3962
AT1G03060	SPI	Beige/BEACH domain ;WD domain, G-beta repeat protein,[Source:TAIR;Acc:AT1G03060]	1205	1078	1280	55.1784	56.646	62.3323	1217	1272	1315	62.9386	70.7004	69.7816
AT1G03080	AT1G03080	kinase interacting (KIP1-like) family protein,[Source:TAIR;Acc:AT1G03080]	1639	1803	2012	75.0517	94.7428	97.9785	1307	1025	1258	67.5931	56.9717	66.7569
AT1G03090	MCCA	methylcrotonyl-CoA carboxylase alpha chain, mitochondrial / 3-methylcrotonyl-CoA carboxylase 1 (MCCA),[Source:TAIR;Acc:AT1G03090]	94	93	108	4.3044	4.8869	5.2593	51	54	99	2.6375	3.0014	5.2535
AT1G03090	MCCA	methylcrotonyl-CoA carboxylase alpha chain, mitochondrial / 3-methylcrotonyl-CoA carboxylase 1 (MCCA),[Source:TAIR;Acc:AT1G03090]	634	352	575	29.0316	18.4967	28.0008	1294	872	1938	66.9208	48.4676	102.8417
AT1G03106	AT1G03106	unknown protein,[Source:TAIR;Acc:AT1G03106]	12	24	4	0.5495	1.2611	0.1948	20	22	6	1.0343	1.2228	0.3184
AT1G03110	TRM82	Transducin/WD40 repeat-like superfamily protein,[Source:TAIR;Acc:AT1G03110]	176	180	174	8.0593	9.4585	8.4733	178	184	188	9.2055	10.2271	9.9764
AT1G03130	PSAD-2	photosystem I subunit D-2,[Source:TAIR;Acc:AT1G03130]	10580	6834	8535	484.471	359.108	415.63	14947	16053	11668	773.0021	892.2596	619.1727
AT1G03140	AT1G03140	splicing factor Prp18 family protein,[Source:TAIR;Acc:AT1G03140]	1000	878	898	45.7912	46.1365	43.73	804	704	865	41.5798	39.1298	45.902
AT1G03150	AT1G03150	Acyl-CoA N-acyltransferases (NAT) superfamily protein,[Source:TAIR;Acc:AT1G03150]	121	100	105	5.5407	5.2547	5.1132	168	152	182	8.6883	8.4485	9.658
AT1G03160	FZL	FZO-like,[Source:TAIR;Acc:AT1G03160]	534	423	422	24.4525	22.2275	20.5502	665	758	719	34.3913	42.1312	38.1544
AT1G03180	AT1G03180	unknown protein,[Source:TAIR;Acc:AT1G03180]	30	25	26	1.3737	1.3137	1.2661	42	38	49	2.1721	2.1121	2.6002
AT1G03190	ATXPD	RAD3-like DNA-binding helicase protein,[Source:TAIR;Acc:AT1G03190]	156	141	152	7.1434	7.4092	7.402	123	131	176	6.3611	7.2813	9.3396
AT1G03210	AT1G03210	Phenazine biosynthesis PhzC/PhzF protein,[Source:TAIR;Acc:AT1G03210]	159	129	124	7.2808	6.7786	6.0384	86	125	102	4.4476	6.9478	5.4127
AT1G03220	AT1G03220	Eukaryotic aspartyl protease family protein,[Source:TAIR;Acc:AT1G03220]	6320	3762	3656	289.4	197.683	178.037	5862	4618	3631	303.1604	256.6782	192.6822
AT1G03230	AT1G03230	Eukaryotic aspartyl protease family protein,[Source:TAIR;Acc:AT1G03230]	852	852	917	39.0141	44.7703	44.6552	679	626	704	35.1153	34.7944	37.3584
AT1G03250	AT1G03250	unknown protein,[Source:TAIR;Acc:AT1G03250]	227	260	239	10.3946	13.6623	11.6386	277	256	294	14.3254	14.229	15.6014
AT1G03260	AT1G03260	SNARE associated Golgi protein family,[Source:TAIR;Acc:AT1G03260]	74	77	92	3.3886	4.0461	4.4801	97	112	109	5.0165	6.2252	5.7842
AT1G03270	AT1G03270	CBS domain-containing protein with a domain of unknown function (DUF21),[Source:TAIR;Acc:AT1G03270]	23	23	10	1.0532	1.2086	0.487	29	30	24	1.4998	1.6675	1.2736
AT1G03280	AT1G03280	Transcription factor TFIIE, alpha subunit,[Source:TAIR;Acc:AT1G03280]	494	417	456	22.6208	21.9122	22.2059	456	375	452	23.5826	20.8433	23.9858
AT1G03290	AT1G03290	unknown protein,[Source:TAIR;Acc:AT1G03290]	236	239	281	10.8067	12.5588	13.6839	288	222	290	14.8943	12.3392	15.3891
AT1G03300	ATDUF1	DOMAIN OF UNKNOWN FUNCTION 724 1,[Source:TAIR;Acc:AT1G03300]	143	138	101	6.5481	7.2515	4.9184	90	88	86	4.6545	4.8912	4.5637
AT1G03310	ATISA2	debranching enzyme 1,[Source:TAIR;Acc:AT1G03310]	674	782	799	30.8633	41.092	38.909	699	581	851	36.1496	32.2932	45.1591
AT1G03330	AT1G03330	Small nuclear ribonucleoprotein family protein,[Source:TAIR;Acc:AT1G03330]	186	223	196	8.5172	11.7181	9.5446	211	218	221	10.9121	12.1169	11.7276
AT1G03350	AT1G03350	BSD domain-containing protein,[Source:TAIR;Acc:AT1G03350]	870	874	883	39.8383	45.9264	42.9995	764	643	756	39.5112	35.7393	40.1178
AT1G03360	ATRRP4	ribosomal RNA processing 4,[Source:TAIR;Acc:AT1G03360]	213	257	185	9.7535	13.5047	9.009	130	121	122	6.7231	6.7254	6.474
AT1G03365	AT1G03365	RING/U-box superfamily protein,[Source:TAIR;Acc:AT1G03365]	393	450	387	17.9959	23.6463	18.8458	286	286	314	14.7908	15.8965	16.6627
AT1G03370	AT1G03370	C2 calcium/lipid-binding and GRAM domain containing protein,[Source:TAIR;Acc:AT1G03370]	312	268	326	14.2868	14.0827	15.8752	415	348	460	21.4622	19.3426	24.4103
AT1G03380	ATATG18G	homolog of yeast autophagy 18 (ATG18) G,[Source:TAIR;Acc:AT1G03380]	935	731	995	42.8148	38.4121	48.4536	1121	913	1071	57.9739	50.7465	56.8336
AT1G03400	AT1G03400	2-oxoglutarate (2OG) and Fe(II)-dependent oxygenase superfamily protein,[Source:TAIR;Acc:AT1G03400]	158	136	162	7.235	7.1464	7.8889	271	268	145	14.0151	14.896	7.6946
AT1G03410	2A6	2-oxoglutarate (2OG) and Fe(II)-dependent oxygenase superfamily protein,[Source:TAIR;Acc:AT1G03410]	496	320	331	22.7124	16.8151	16.1187	418	371	420	21.6174	20.621	22.2877
AT1G03410	2A6	2-oxoglutarate (2OG) and Fe(II)-dependent oxygenase superfamily protein,[Source:TAIR;Acc:AT1G03410]	440	287	310	20.1481	15.0811	15.0961	338	296	338	17.4801	16.4523	17.9363
AT1G03430	AHP5	histidine-containing phosphotransfer factor 5,[Source:TAIR;Acc:AT1G03430]	63	59	66	2.8848	3.1003	3.214	119	93	130	6.1542	5.1691	6.8986
AT1G03440	AT1G03440	Leucine-rich repeat (LRR) family protein,[Source:TAIR;Acc:AT1G03440]	636	441	532	29.1232	23.1734	25.9068	621	478	450	32.1158	26.5682	23.8796
AT1G03457	AT1G03457	RNA-binding (RRM/RBD/RNP motifs) family protein,[Source:TAIR;Acc:AT1G03457]	152	103	100	6.9603	5.4124	4.8697	307	218	250	15.8769	12.1169	13.2665
AT1G03470	AT1G03470	Kinase interacting (KIP1-like) family protein,[Source:TAIR;Acc:AT1G03470]	159	156	135	7.2808	8.1974	6.5741	85	50	111	4.3959	2.7791	5.8903
AT1G03475	LIN2	Coproporphyrinogen III oxidase,[Source:TAIR;Acc:AT1G03475]	2396	1733	1822	109.716	91.0645	88.7261	2346	2254	2534	121.3262	125.2821	134.4689
AT1G03495	AT1G03495	HXXXD-type acyl-transferase family protein,[Source:TAIR;Acc:AT1G03495]	286	286	285	13.0963	15.0285	13.8787	209	214	232	10.8087	11.8946	12.3113
AT1G03510	AT1G03510	Tetratricopeptide repeat (TPR)-like superfamily protein,[Source:TAIR;Acc:AT1G03510]	34	16	28	1.5569	0.8408	1.3635	17	20	26	0.8792	1.1116	1.3797
AT1G03520	AT1G03520	Core-2/I-branching beta-1,6-N-acetylglucosaminyltransferase family protein,[Source:TAIR;Acc:AT1G03520]	121	133	119	5.5407	6.9888	5.795	283	233	246	14.6357	12.9506	13.0542
AT1G03530	ATNAF1	nuclear assembly factor 1,[Source:TAIR;Acc:AT1G03530]	1031	868	806	47.2107	45.6111	39.2498	172	192	181	8.8952	10.6718	9.6049
AT1G03540	AT1G03540	Pentatricopeptide repeat (PPR-like) superfamily protein,[Source:TAIR;Acc:AT1G03540]	54	37	37	2.4727	1.9443	1.8018	22	30	24	1.1378	1.6675	1.2736
AT1G03550	AT1G03550	Secretory carrier membrane protein (SCAMP) family protein,[Source:TAIR;Acc:AT1G03550]	79	91	66	3.6175	4.7818	3.214	76	88	108	3.9304	4.8912	5.7311
AT1G03550	AT1G03550	Secretory carrier membrane protein (SCAMP) family protein,[Source:TAIR;Acc:AT1G03550]	49	64	41	2.2438	3.363	1.9966	56	66	68	2.8961	3.6684	3.6085
AT1G03560	AT1G03560	Pentatricopeptide repeat (PPR-like) superfamily protein,[Source:TAIR;Acc:AT1G03560]	233	244	226	10.6693	12.8215	11.0055	174	143	203	8.9986	7.9482	10.7724
AT1G03590	AT1G03590	Protein phosphatase 2C family protein,[Source:TAIR;Acc:AT1G03590]	469	450	506	21.4761	23.6463	24.6407	650	535	629	33.6155	29.7364	33.3784
AT1G03600	PSB27	photosystem II family protein,[Source:TAIR;Acc:AT1G03600]	5894	4338	5367	269.893	227.95	261.357	10447	9293	8834	540.2792	516.5246	468.784
AT1G03610	AT1G03610	Protein of unknown function (DUF789),[Source:TAIR;Acc:AT1G03610]	328	275	384	15.0195	14.4505	18.6997	778	698	693	40.2352	38.7963	36.7747
AT1G03630	POR C	protochlorophyllide oxidoreductase C,[Source:TAIR;Acc:AT1G03630]	897	1110	900	41.0747	58.3275	43.8274	2512	2915	1937	129.9111	162.0219	102.7886
AT1G03650	AT1G03650	Acyl-CoA N-acyltransferases (NAT) superfamily protein,[Source:TAIR;Acc:AT1G03650]	29	28	40	1.3279	1.4713	1.9479	18	23	37	0.9309	1.2784	1.9634
AT1G03680	ATHM1	thioredoxin M-type 1,[Source:TAIR;Acc:AT1G03680]	2358	2158	2211	107.976	113.397	107.669	3932	3608	3500	203.3481	200.5403	185.7306
AT1G03687	AT1G03687	DTW domain-containing protein,[Source:TAIR;Acc:AT1G03687]	108	110	127	4.9455	5.7802	6.1845	225	158	276	11.6361	8.782	14.6462
AT1G03730	AT1G03730	unknown protein,[Source:TAIR;Acc:AT1G03730]	80	75	70	3.6633	3.9411	3.4088	90	98	98	4.6545	5.447	5.2005
AT1G03740	AT1G03740	Protein kinase superfamily protein,[Source:TAIR;Acc:AT1G03740]	240	233	249	10.9899	12.2435	12.1256	377	366	331	19.497	20.3431	17.5648
AT1G03750	CHR9	switch 2,[Source:TAIR;Acc:AT1G03750]	104	97	107	4.7623	5.0971	5.2106	94	104	137	4.8613	5.7805	7.27
AT1G03750	CHR9	switch 2,[Source:TAIR;Acc:AT1G03750]	110	119	120	5.037	6.2531	5.8437	73	70	102	3.7753	3.8907	5.4127
AT1G03770	RING1B	RING 1B,[Source:TAIR;Acc:AT1G03770]	105	117	119	4.8081	6.148	5.795	118	69	158	6.1025	3.8352	8.3844
AT1G03780	TPX2	targeting protein for XKLP2,[Source:TAIR;Acc:AT1G03780]	128	95	84	5.8613	4.992	4.0906	71	115	55	3.6719	6.3919	2.9186
AT1G03790	SOM	Zinc finger C-x8-C-x5-C-x3-H type family protein,[Source:TAIR;Acc:AT1G03790]	51	32	66	2.3354	1.6815	3.214	90	21	22	4.6545	1.1672	1.1674
AT1G03820	AT1G03820	unknown protein,[Source:TAIR;Acc:AT1G03820]	68	99	165	3.1138	5.2022	8.035	77	98	76	3.9821	5.447	4.033
AT1G03830	AT1G03830	guanylate-binding family protein,[Source:TAIR;Acc:AT1G03830]	187	174	226	8.563	9.1432	11.0055	86	100	192	4.4476	5.5582	10.1886
AT1G03840	MGP	C2H2 and C2HC zinc fingers superfamily protein,[Source:TAIR;Acc:AT1G03840]	25	37	16	1.1448	1.9443	0.7792	24	37	9	1.2412	2.0565	0.4776
AT1G03850	AT1G03850	Glutaredoxin family protein,[Source:TAIR;Acc:AT1G03850]	234	143	226	10.7151	7.5143	11.0055	552	457	340	28.5473	25.401	18.0424
AT1G03860	ATPHB2	prohibitin 2,[Source:TAIR;Acc:AT1G03860]	1196	1238	1151	54.7663	65.0536	56.0503	1169	1016	1711	60.4562	56.4714	90.7957
AT1G03870	FLA9	FASCICLIN-like arabinoogalactan 9,[Source:TAIR;Acc:AT1G03870]	3271	2827	2200	149.783	148.551	107.134	5704	4543	3777	294.9892	252.5095	200.4298
AT1G03900	ATNAP4	non-intrinsic ABC protein 4,[Source:TAIR;Acc:AT1G03900]	1256	1079	1227	57.5137	56.6986	59.7513	1061	910	1184	54.8709	50.5797	62.83
AT1G03905	AT1G03905	P-loop containing nucleoside triphosphate hydrolases superfamily protein,[Source:TAIR;Acc:AT1G03905]	77	77	72	3.5259	4.0461	3.5062	50	49	38	2.5858	2.7235	2.0165
AT1G03910	AT1G03910	No description	719	782	728	32.9239	41.092	35.4515	601	572	741	31.0814	31.793	39.3218
AT1G03920	AT1G03920	Protein kinase family protein,[Source:TAIR;Acc:AT1G03920]	34	19	18	1.5569	0.9984	0.8765	34	32	23	1.7584	1.7786	1.2205
AT1G03930	ADK1	dual specificity kinase 1,[Source:TAIR;Acc:AT1G03930]	388	308	311	17.767	16.1846	15.1448	501	497	586	25.9098	27.6243	31.0966
AT1G03940	AT1G03940	HXXXD-type acyl-transferase family protein,[Source:TAIR;Acc:AT1G03940]	224	238	257	10.2572	12.5063	12.5151	201	200	200	10.395	11.1164	10.6132
AT1G03950	VPS2,3	vacuolar protein sorting-associated protein 2,3,[Source:TAIR;Acc:AT1G03950]	27	27	38	1.2364	1.4188	1.8505	80	76	69	4.1373	4.2242	3.6615
AT1G03960	AT1G03960	Calcium-binding EF hand family protein,[Source:TAIR;Acc:AT1G03960]	57	64	67	2.6101	3.363	3.2627	75	65	92	3.8787	3.6128	4.8821
AT1G03970	GBF4	G-box binding factor 4,[Source:TAIR;Acc:AT1G03970]	312	247	370	14.2868	12.9792	18.0179	242	187	344	12.5153	10.3939	18.2547
AT1G03970	GBF4	G-box binding factor 4,[Source:TAIR;Acc:AT1G03970]	208	200	288	9.5246	10.5095	14.0248	161	119	202	8.3263	6.6143	10.7193
AT1G03990	AT1G03990	Long-chain fatty alcohol dehydrogenase family protein,[Source:TAIR;Acc:AT1G03990]	70	93	63	3.2054	4.8869	3.0679	107	72	57	5.5336	4.0019	3.0248
AT1G04000	AT1G04000	unknown protein,[Source:TAIR;Acc:AT1G04000]	166	153	130	7.6013	8.0397	6.3306	358	246	181	18.5144	13.6732	9.6049
AT1G04010	PSAT1	phospholipid sterol acyl transferase 1,[Source:TAIR;Acc:AT1G04010]	40	48	40	1.8317	2.5223	1.9479	69	75	52	3.5684	4.1687	2.7594
AT1G04020	ATBARD1	breast cancer associated RING 1,[Source:TAIR;Acc:AT1G04020]	163	163	122	7.464	8.5652	5.941	170	126	132	8.7918	7.0033	7.0047
AT1G04030	AT1G04030	unknown protein,[Source:TAIR;Acc:AT1G04030]	625	692	567	28.6195	36.3627	27.6112	654	854	597	33.8224	47.4671	31.6803
AT1G04030	AT1G04030	unknown protein,[Source:TAIR;Acc:AT1G04030]	1403	1893	1406	64.245	99.4721	68.4681	2029	2627	1804	104.9322	146.0142	95.7308
AT1G04050	SUVR1	homolog of SU(var)3-9 1,[Source:TAIR;Acc:AT1G04050]	41	57	56	1.8774	2.9952	2.727	36	36	33	1.8618	2.001	1.7512
AT1G04070	TOM22-I	translocase of outer membrane 22-I,[Source:TAIR;Acc:AT1G04070]	150	150	120	6.8687	7.8821	5.8437	71	68	98	3.6719	3.7796	5.2005
AT1G04080	PRP39	Tetratricopeptide repeat (TPR)-like superfamily protein,[Source:TAIR;Acc:AT1G04080]	1444	1474	1406	66.1225	77.4547	68.4681	1422	1227	1663	73.5404	68.1993	88.2486
AT1G04110	SDD1	Subtilase family protein,[Source:TAIR;Acc:AT1G04110]	169	166	109	7.7387	8.7229	5.308	122	85	161	6.3094	4.7245	8.5436
AT1G04120	MRP5	multidrug resistance-associated protein 5,[Source:TAIR;Acc:AT1G04120]	2042	2094	1948	93.5056	110.034	94.8619	1299	1233	1206	67.1793	68.5327	63.9975
AT1G04130	TPR2	Tetratricopeptide repeat (TPR)-like superfamily protein,[Source:TAIR;Acc:AT1G04130]	1165	1032	1117	53.3467	54.2288	54.3946	1490	1342	1650	77.0571	74.5912	87.5587
AT1G04130	TPR2	Tetratricopeptide repeat (TPR)-like superfamily protein,[Source:TAIR;Acc:AT1G04130]	150	131	124	6.8687	6.8837	6.0384	197	129	204	10.1881	7.1701	10.8254
AT1G04160	XIB	myosin XI B,[Source:TAIR;Acc:AT1G04160]	49	68	39	2.2438	3.5732	1.8992	118	112	88	6.1025	6.2252	4.6698
AT1G04170	EIF2 GAMMA	eukaryotic translation initiation factor 2 gamma subunit,[Source:TAIR;Acc:AT1G04170]	1727	1789	1635	79.0814	94.0071	79.6197	1437	1342	1696	74.3162	74.5912	89.9997
AT1G04180	YUC9	YUCCA 9,[Source:TAIR;Acc:AT1G04180]	9	23	17	0.4121	1.2086	0.8279	119	75	28	6.1542	4.1687	1.4858
AT1G04190	AT1G04190	Tetratricopeptide repeat (TPR)-like superfamily protein,[Source:TAIR;Acc:AT1G04190]	304	329	362	13.9205	17.2881	17.6283	240	243	273	12.4119	13.5065	14.487
AT1G04200	AT1G04200	No description	114	125	151	5.2202	6.5684	7.3533	338	290	409	17.4801	16.1188	21.7039
AT1G04210	AT1G04210	Leucine-rich repeat protein kinase family protein,[Source:TAIR;Acc:AT1G04210]	1192	1168	1115	54.5831	61.3753	54.2972	1090	825	1112	56.3707	45.8552	59.0093
AT1G04210	AT1G04210	Leucine-rich repeat protein kinase family protein,[Source:TAIR;Acc:AT1G04210]	574	640	565	26.2841	33.6303	27.5138	659	623	345	34.081	34.6277	18.3077
AT1G04230	AT1G04230	Protein of unknown function (DUF2361),[Source:TAIR;Acc:AT1G04230]	108	114	91	4.9455	5.9904	4.4314	108	132	130	5.5853	7.3368	6.8986
AT1G04240	SHY2	AUX/IAA transcriptional regulator family protein,[Source:TAIR;Acc:AT1G04240]	270	220	235	12.3636	11.5604	11.4438	587	649	341	30.3574	36.0728	18.0955
AT1G04250	AXR3	AUX/IAA transcriptional regulator family protein,[Source:TAIR;Acc:AT1G04250]	702	648	643	32.1454	34.0507	31.3122	1401	1573	1040	72.4544	87.4307	55.1885
AT1G04260	MPI7	CAMV movement protein interacting protein 7,[Source:TAIR;Acc:AT1G04260]	160	169	166	7.3266	8.8805	8.0837	264	224	257	13.6531	12.4504	13.6379
AT1G04270	RPS15	cytosolic ribosomal protein S15,[Source:TAIR;Acc:AT1G04270]	3415	3758	3089	156.377	197.473	150.425	3701	3295	4466	191.4017	183.1431	236.9922
AT1G04280	AT1G04280	P-loop containing nucleoside triphosphate hydrolases superfamily protein,[Source:TAIR;Acc:AT1G04280]	342	383	458	15.6606	20.1256	22.3033	680	560	598	35.167	31.126	31.7334
AT1G04290	AT1G04290	Thioesterase superfamily protein,[Source:TAIR;Acc:AT1G04290]	167	207	199	7.6471	10.8773	9.6907	215	182	165	11.119	10.1159	8.7559
AT1G04290	AT1G04290	Thioesterase superfamily protein,[Source:TAIR;Acc:AT1G04290]	120	166	168	5.4949	8.7229	8.1811	169	141	124	8.74	7.8371	6.5802
AT1G04300	AT1G04300	TRAF-like superfamily protein,[Source:TAIR;Acc:AT1G04300]	1027	975	1014	47.0275	51.2336	49.3788	1196	940	1430	61.8526	52.2472	75.8842
AT1G04310	ERS2	ethylene response sensor 2,[Source:TAIR;Acc:AT1G04310]	191	149	177	8.7461	7.8296	8.6194	106	97	191	5.4819	5.3915	10.1356
AT1G04340	AT1G04340	HR-like lesion-inducing protein-related,[Source:TAIR;Acc:AT1G04340]	122	122	119	5.5865	6.4108	5.795	168	128	182	8.6883	7.1145	9.658
AT1G04350	AT1G04350	2-oxoglutarate (2OG) and Fe(II)-dependent oxygenase superfamily protein,[Source:TAIR;Acc:AT1G04350]	588	633	647	26.9252	33.2625	31.507	1302	1018	1200	67.3345	56.5826	63.6791
AT1G04360	AT1G04360	RING/U-box superfamily protein,[Source:TAIR;Acc:AT1G04360]	77	53	63	3.5259	2.785	3.0679	117	92	87	6.0508	5.1136	4.6167
AT1G04390	AT1G04390	BTB/POZ domain-containing protein,[Source:TAIR;Acc:AT1G04390]	128	139	157	5.8613	7.3041	7.6454	143	116	152	7.3954	6.4475	8.066
AT1G04400	CRY2	cryptochrome 2,[Source:TAIR;Acc:AT1G04400]	1456	1241	1411	66.672	65.2112	68.7116	1914	1777	2141	98.9848	98.7694	113.6141
AT1G04410	AT1G04410	Lactate/malate dehydrogenase family protein,[Source:TAIR;Acc:AT1G04410]	9170	9328	10206	419.905	490.161	497.002	11548	9919	15258	597.2187	551.319	809.6792
AT1G04420	AT1G04420	NAD(P)-linked oxidoreductase superfamily protein,[Source:TAIR;Acc:AT1G04420]	1080	1078	1001	49.4545	56.646	48.7458	1943	1871	1883	100.4846	103.9941	99.9231
AT1G04430	AT1G04430	S-adenosyl-L-methionine-dependent methyltransferases superfamily protein,[Source:TAIR;Acc:AT1G04430]	929	1027	950	42.54	53.9661	46.2622	1620	1367	1928	83.7802	75.9807	102.311
AT1G04440	CKL13	casein kinase like 13,[Source:TAIR;Acc:AT1G04440]	370	373	368	16.9427	19.6001	17.9205	849	804	1046	43.9071	44.688	55.5069
AT1G04480	AT1G04480	Ribosomal protein L14p/L23e family protein,[Source:TAIR;Acc:AT1G04480]	4700	3581	3767	215.219	188.172	183.442	1955	1800	2180	101.1052	100.0478	115.6836
AT1G04510	MAC3A	MOS4-associated complex 3A,[Source:TAIR;Acc:AT1G04510]	380	433	390	17.4006	22.753	18.9919	715	657	789	36.9771	36.5174	41.869
AT1G04520	PDLP2	plasmodesmata-located protein 2,[Source:TAIR;Acc:AT1G04520]	473	486	411	21.6592	25.538	20.0145	299	278	247	15.4631	15.4518	13.1073
AT1G04530	AT1G04530	Tetratricopeptide repeat (TPR)-like superfamily protein,[Source:TAIR;Acc:AT1G04530]	1507	1292	1232	69.0073	67.8911	59.9948	1205	1216	811	62.318	67.5878	43.0364
AT1G04540	AT1G04540	Calcium-dependent lipid-binding (CaLB domain) family protein,[Source:TAIR;Acc:AT1G04540]	42	35	30	1.9232	1.8392	1.4609	22	10	15	1.1378	0.5558	0.796
AT1G04550	IAA12	AUX/IAA transcriptional regulator family protein,[Source:TAIR;Acc:AT1G04550]	463	313	333	21.2013	16.4473	16.2161	266	290	187	13.7565	16.1188	9.9233
AT1G04555	AT1G04555	unknown protein,[Source:TAIR;Acc:AT1G04555]	47	39	60	2.1522	2.0494	2.9218	47	53	66	2.4307	2.9459	3.5023
AT1G04560	AT1G04560	AWPM-19-like family protein,[Source:TAIR;Acc:AT1G04560]	64	44	5	2.9306	2.3121	0.2435	11	13	0	0.5689	0.7226	0
AT1G04590	AT1G04590	No description	197	212	223	9.0209	11.14	10.8594	205	219	280	10.6018	12.1725	14.8584
AT1G04610	YUC3	YUCCA 3,[Source:TAIR;Acc:AT1G04610]	27	21	17	1.2364	1.1035	0.8279	14	20	6	0.724	1.1116	0.3184
AT1G04620	AT1G04620	coenzyme F420 hydrogenase family / dehydrogenase, beta subunit family,[Source:TAIR;Acc:AT1G04620]	87	78	61	3.9838	4.0987	2.9705	265	242	222	13.7048	13.4509	11.7806
AT1G04625	AT1G04625	Polynucleotidyl transferase, ribonuclease H-like superfamily protein,[Source:TAIR;Acc:AT1G04625]	529	482	489	24.2235	25.3278	23.8129	443	373	508	22.9103	20.7321	26.9575
AT1G04625	AT1G04625	Polynucleotidyl transferase, ribonuclease H-like superfamily protein,[Source:TAIR;Acc:AT1G04625]	56	56	43	2.5643	2.9427	2.094	34	30	34	1.7584	1.6675	1.8042
AT1G04635	EMB1687	ribonuclease P family protein / Rpp14 family protein,[Source:TAIR;Acc:AT1G04635]	59	55	46	2.7017	2.8901	2.2401	21	22	30	1.086	1.2228	1.592
AT1G04640	LIP2	lipoyltransferase 2,[Source:TAIR;Acc:AT1G04640]	348	363	388	15.9353	19.0747	18.8945	462	526	484	23.8929	29.2362	25.6839
AT1G04650	AT1G04650	unknown protein,[Source:TAIR;Acc:AT1G04650]	78	52	92	3.5717	2.7325	4.4801	97	57	73	5.0165	3.1682	3.8738
AT1G04680	AT1G04680	Pectin lyase-like superfamily protein,[Source:TAIR;Acc:AT1G04680]	416	573	531	19.0491	30.1096	25.8581	927	841	867	47.9409	46.7446	46.0081
AT1G04690	KAB1	potassium channel beta subunit 1,[Source:TAIR;Acc:AT1G04690]	942	1002	1008	43.1353	52.6524	49.0867	774	760	962	40.0283	42.2424	51.0494
AT1G04700	AT1G04700	PB1 domain-containing protein tyrosine kinase,[Source:TAIR;Acc:AT1G04700]	27	47	34	1.2364	2.4697	1.6557	53	47	39	2.741	2.6124	2.0696
AT1G04710	KAT1	peroxisomal 3-ketoacyl-CoA thiolase 4,[Source:TAIR;Acc:AT1G04710]	146	137	146	6.6855	7.199	7.1098	321	283	381	16.6009	15.7297	20.2181
AT1G04730	CTF18	P-loop containing nucleoside triphosphate hydrolases superfamily protein,[Source:TAIR;Acc:AT1G04730]	80	80	67	3.6633	4.2038	3.2627	130	63	125	6.7231	3.5017	6.6332
AT1G04750	VAMP7B	vesicle-associated membrane protein 721,[Source:TAIR;Acc:AT1G04750]	497	529	467	22.7582	27.7975	22.7415	684	661	785	35.3739	36.7398	41.6567
AT1G04770	AT1G04770	Tetratricopeptide repeat (TPR)-like superfamily protein,[Source:TAIR;Acc:AT1G04770]	118	237	222	5.4034	12.4537	10.8108	134	106	143	6.93	5.8917	7.5884
AT1G04780	AT1G04780	Ankyrin repeat family protein,[Source:TAIR;Acc:AT1G04780]	663	653	727	30.3596	34.3134	35.4028	841	668	993	43.4933	37.1289	52.6944
AT1G04790	AT1G04790	RING/U-box superfamily protein,[Source:TAIR;Acc:AT1G04790]	406	360	350	18.5912	18.917	17.044	359	280	362	18.5661	15.563	19.2098
AT1G04800	AT1G04800	glycine-rich protein,[Source:TAIR;Acc:AT1G04800]	5988	5026	3737	274.198	264.103	181.981	2580	1297	2638	133.4278	72.09	139.9878
AT1G04810	AT1G04810	26S proteasome regulatory complex, non-ATPase subcomplex, Rpn2/Psmd1 subunit,[Source:TAIR;Acc:AT1G04810]	1258	1185	1182	57.6053	62.2686	57.5599	1191	1037	1430	61.594	57.6386	75.8842
AT1G04820	TUA4	tubulin alpha-4 chain,[Source:TAIR;Acc:AT1G04820]	4104	4188	3431	187.927	220.068	167.08	4821	4212	4247	249.3238	234.1119	225.3708
AT1G04830	AT1G04830	Ypt/Rab-GAP domain of gyp1p superfamily protein,[Source:TAIR;Acc:AT1G04830]	125	107	116	5.7239	5.6226	5.6489	230	180	245	11.8947	10.0048	13.0011
AT1G04850	AT1G04850	ubiquitin-associated (UBA)/TS-N domain-containing protein,[Source:TAIR;Acc:AT1G04850]	618	608	687	28.299	31.9488	33.4549	782	749	833	40.4421	41.631	44.2039
AT1G04860	UBP2	ubiquitin-specific protease 2,[Source:TAIR;Acc:AT1G04860]	941	912	883	43.0895	47.9232	42.9995	656	571	756	33.9258	31.7374	40.1178
AT1G04870	PRMT10	protein arginine methyltransferase 10,[Source:TAIR;Acc:AT1G04870]	540	550	506	24.7272	28.901	24.6407	396	338	414	20.4796	18.7868	21.9693
AT1G04880	AT1G04880	HMG (high mobility group) box protein with ARID/BRIGHT DNA-binding domain,[Source:TAIR;Acc:AT1G04880]	43	40	54	1.969	2.1019	2.6296	99	55	88	5.1199	3.057	4.6698
AT1G04900	AT1G04900	Protein of unknown function (DUF185),[Source:TAIR;Acc:AT1G04900]	71	74	82	3.2512	3.8885	3.9932	92	90	141	4.7579	5.0024	7.4823
AT1G04900	AT1G04900	Protein of unknown function (DUF185),[Source:TAIR;Acc:AT1G04900]	376	349	391	17.2175	18.339	19.0406	314	263	393	16.2389	14.6181	20.8549
AT1G04920	ATSPS3F	sucrose phosphate synthase 3F,[Source:TAIR;Acc:AT1G04920]	51	31	19	2.3354	1.629	0.9252	29	12	33	1.4998	0.667	1.7512
AT1G04930	AT1G04930	hydroxyproline-rich glycoprotein family protein,[Source:TAIR;Acc:AT1G04930]	70	51	43	3.2054	2.6799	2.094	36	32	49	1.8618	1.7786	2.6002
AT1G04945	AT1G04945	HIT-type Zinc finger family protein,[Source:TAIR;Acc:AT1G04945]	653	548	540	29.9016	28.7959	26.2964	1025	946	1194	53.0091	52.5807	63.3607
AT1G04945	AT1G04945	HIT-type Zinc finger family protein,[Source:TAIR;Acc:AT1G04945]	824	771	721	37.7319	40.514	35.1106	1102	1023	1273	56.9913	56.8605	67.5529
AT1G04945	AT1G04945	HIT-type Zinc finger family protein,[Source:TAIR;Acc:AT1G04945]	138	131	137	6.3192	6.8837	6.6715	286	275	323	14.7908	15.2851	17.1403
AT1G04960	AT1G04960	Protein of unknown function (DUF1664),[Source:TAIR;Acc:AT1G04960]	140	141	155	6.4108	7.4092	7.5481	273	222	274	14.1185	12.3392	14.5401
AT1G04970	AT1G04970	lipid-binding serum glycoprotein family protein,[Source:TAIR;Acc:AT1G04970]	367	389	355	16.8054	20.4409	17.2875	604	482	765	31.2366	26.7906	40.5954
AT1G04980	ATPDIL2-2	PDI-like 2-2,[Source:TAIR;Acc:AT1G04980]	178	213	163	8.1508	11.1926	7.9376	157	118	224	8.1194	6.5587	11.8868
AT1G04985	AT1G04985	unknown protein,[Source:TAIR;Acc:AT1G04985]	718	493	603	32.8781	25.9058	29.3643	332	267	397	17.1698	14.8404	21.0672
AT1G04990	AT1G04990	Zinc finger C-x8-C-x5-C-x3-H type family protein,[Source:TAIR;Acc:AT1G04990]	241	218	325	11.0357	11.4553	15.8265	130	106	197	6.7231	5.8917	10.454
AT1G05000	AT1G05000	Phosphotyrosine protein phosphatases superfamily protein,[Source:TAIR;Acc:AT1G05000]	90	90	112	4.1212	4.7293	5.4541	154	157	146	7.9643	8.7264	7.7476
AT1G05010	EFE	ethylene-forming enzyme,[Source:TAIR;Acc:AT1G05010]	5317	4222	5193	243.472	221.855	252.884	5389	4889	6544	278.6986	271.7409	347.2631
AT1G05020	AT1G05020	ENTH/ANTH/VHS superfamily protein,[Source:TAIR;Acc:AT1G05020]	36	31	29	1.6485	1.629	1.4122	67	64	72	3.465	3.5573	3.8207
AT1G05030	AT1G05030	Major facilitator superfamily protein,[Source:TAIR;Acc:AT1G05030]	68	60	67	3.1138	3.1528	3.2627	134	128	150	6.93	7.1145	7.9599
AT1G05055	ATGTF2H2	general transcription factor II H2,[Source:TAIR;Acc:AT1G05055]	250	229	263	11.4478	12.0333	12.8073	168	157	209	8.6883	8.7264	11.0908
AT1G05060	AT1G05060	unknown protein,[Source:TAIR;Acc:AT1G05060]	123	103	136	5.6323	5.4124	6.6228	109	118	128	5.6371	6.5587	6.7924
AT1G05070	AT1G05070	Protein of unknown function (DUF1068),[Source:TAIR;Acc:AT1G05070]	295	254	250	13.5084	13.347	12.1743	276	295	328	14.2737	16.3967	17.4056
AT1G05090	AT1G05090	dentin sialophosphoprotein-related,[Source:TAIR;Acc:AT1G05090]	196	196	164	8.9751	10.2993	7.9863	254	192	274	13.1359	10.6718	14.5401
AT1G05120	AT1G05120	Helicase protein with RING/U-box domain,[Source:TAIR;Acc:AT1G05120]	281	267	332	12.8673	14.0301	16.1674	268	214	278	13.8599	11.8946	14.7523
AT1G05140	AT1G05140	Peptidase M50 family protein,[Source:TAIR;Acc:AT1G05140]	869	813	812	39.7925	42.721	39.542	1326	1475	1039	68.5757	81.9836	55.1355
AT1G05150	AT1G05150	Calcium-binding tetratricopeptide family protein,[Source:TAIR;Acc:AT1G05150]	1173	931	924	53.7131	48.9216	44.9961	786	674	677	40.6489	37.4623	35.9256
AT1G05160	CYP88A3	cytochrome P450, family 88, subfamily A, polypeptide 3,[Source:TAIR;Acc:AT1G05160]	119	80	74	5.4492	4.2038	3.6036	102	83	105	5.2751	4.6133	5.5719
AT1G05170	AT1G05170	Galactosyltransferase family protein,[Source:TAIR;Acc:AT1G05170]	177	152	172	8.105	7.9872	8.3759	120	117	87	6.2059	6.5031	4.6167
AT1G05180	AXR1	NAD(P)-binding Rossmann-fold superfamily protein,[Source:TAIR;Acc:AT1G05180]	242	262	267	11.0815	13.7674	13.0021	300	282	406	15.5149	15.6742	21.5447
AT1G05190	emb2394	Ribosomal protein L6 family,[Source:TAIR;Acc:AT1G05190]	5136	4926	3949	235.184	258.848	192.305	7205	6256	7281	372.6152	347.7217	386.3727
AT1G05200	ATGLR3,4	glutamate receptor 3,4,[Source:TAIR;Acc:AT1G05200]	544	498	423	24.9104	26.1686	20.5989	311	377	421	16.0837	20.9545	22.3407
AT1G05200	ATGLR3,4	glutamate receptor 3,4,[Source:TAIR;Acc:AT1G05200]	122	121	112	5.5865	6.3582	5.4541	148	146	194	7.654	8.115	10.2948
AT1G05210	AT1G05210	Transmembrane protein 97, predicted,[Source:TAIR;Acc:AT1G05210]	40	48	30	1.8317	2.5223	1.4609	46	47	52	2.3789	2.6124	2.7594
AT1G05220	AT1G05220	Transmembrane protein 97, predicted,[Source:TAIR;Acc:AT1G05220]	319	244	297	14.6074	12.8215	14.463	334	289	324	17.2732	16.0632	17.1933
AT1G05220	AT1G05220	Transmembrane protein 97, predicted,[Source:TAIR;Acc:AT1G05220]	64	58	57	2.9306	3.0477	2.7757	88	63	67	4.551	3.5017	3.5554
AT1G05240	AT1G05240	Peroxidase superfamily protein,[Source:TAIR;Acc:AT1G05240]	221	243	145	10.1199	12.769	7.0611	579	490	214	29.9437	27.2352	11.3561
AT1G05250	AT1G05250	Peroxidase superfamily protein,[Source:TAIR;Acc:AT1G05250]	251	242	178	11.4936	12.7165	8.6681	555	487	249	28.7025	27.0685	13.2134
AT1G05260	RCI3	Peroxidase superfamily protein,[Source:TAIR;Acc:AT1G05260]	389	365	209	17.8128	19.1798	10.1777	604	706	218	31.2366	39.241	11.5684
AT1G05270	AT1G05270	TraB family protein,[Source:TAIR;Acc:AT1G05270]	343	328	373	15.7064	17.2355	18.164	436	375	452	22.5483	20.8433	23.9858
AT1G05280	AT1G05280	Protein of unknown function (DUF604),[Source:TAIR;Acc:AT1G05280]	21	32	14	0.9616	1.6815	0.6818	5	24	3	0.2586	1.334	0.1592
AT1G05300	ZIP5	zinc transporter 5 precursor,[Source:TAIR;Acc:AT1G05300]	64	40	53	2.9306	2.1019	2.581	74	39	51	3.827	2.1677	2.7064
AT1G05310	AT1G05310	Pectin lyase-like superfamily protein,[Source:TAIR;Acc:AT1G05310]	50	38	36	2.2896	1.9968	1.7531	73	63	37	3.7753	3.5017	1.9634
AT1G05320	AT1G05320	No description	317	314	353	14.5158	16.4999	17.1901	279	283	318	14.4288	15.7297	16.875
AT1G05340	AT1G05340	unknown protein,[Source:TAIR;Acc:AT1G05340]	32	28	17	1.4653	1.4713	0.8279	101	65	65	5.2233	3.6128	3.4493
AT1G05350	AT1G05350	NAD(P)-binding Rossmann-fold superfamily protein,[Source:TAIR;Acc:AT1G05350]	136	166	138	6.2276	8.7229	6.7202	228	200	297	11.7913	11.1164	15.7606
AT1G05360	AT1G05360	No description	137	146	116	6.2734	7.6719	5.6489	181	147	193	9.3606	8.1706	10.2417
AT1G05380	AT1G05380	Acyl-CoA N-acyltransferase with RING/FYVE/PHD-type zinc finger protein,[Source:TAIR;Acc:AT1G05380]	868	794	833	39.7467	41.7226	40.5647	921	702	1059	47.6306	39.0186	56.1968
AT1G05385	LPA19	photosystem II 11 kDa protein-related,[Source:TAIR;Acc:AT1G05385]	155	135	131	7.0976	7.0939	6.3793	377	286	438	19.497	15.8965	23.2429
AT1G05400	AT1G05400	unknown protein,[Source:TAIR;Acc:AT1G05400]	16	20	6	0.7327	1.051	0.2922	18	10	22	0.9309	0.5558	1.1674
AT1G05400	AT1G05400	unknown protein,[Source:TAIR;Acc:AT1G05400]	269	283	309	12.3178	14.8709	15.0474	275	242	313	14.222	13.4509	16.6096
AT1G05430	AT1G05430	unknown protein,[Source:TAIR;Acc:AT1G05430]	230	229	229	10.532	12.0333	11.1516	309	252	319	15.9803	14.0067	16.928
AT1G05450	AT1G05450	Bifunctional inhibitor/lipid-transfer protein/seed storage 2S albumin superfamily protein,[Source:TAIR;Acc:AT1G05450]	327	268	293	14.9737	14.0827	14.2682	202	171	225	10.4467	9.5045	11.9398
AT1G05470	CVP2	DNAse I-like superfamily protein,[Source:TAIR;Acc:AT1G05470]	152	148	113	6.9603	7.777	5.5028	168	182	78	8.6883	10.1159	4.1391
AT1G05490	chr31	chromatin remodeling 31,[Source:TAIR;Acc:AT1G05490]	21	22	144	0.9616	1.156	7.0124	24	19	35	1.2412	1.0561	1.8573
AT1G05500	SYTE	Calcium-dependent lipid-binding (CaLB domain) family protein,[Source:TAIR;Acc:AT1G05500]	294	383	343	13.4626	20.1256	16.7031	528	563	595	27.3062	31.2927	31.5742
AT1G05520	AT1G05520	Sec23/Sec24 protein transport family protein,[Source:TAIR;Acc:AT1G05520]	719	661	692	32.9239	34.7338	33.6984	472	454	586	24.41	25.2343	31.0966
AT1G05530	UGT75B2	UDP-glucosyl transferase 75B2,[Source:TAIR;Acc:AT1G05530]	16	23	14	0.7327	1.2086	0.6818	17	19	11	0.8792	1.0561	0.5837
AT1G05560	UGT1	UDP-glucosyltransferase 75B1,[Source:TAIR;Acc:AT1G05560]	2460	2061	1743	112.646	108.3	84.879	1251	1319	1824	64.697	73.3128	96.7922
AT1G05560	UGT1	UDP-glucosyltransferase 75B1,[Source:TAIR;Acc:AT1G05560]	1894	1574	1348	86.7285	82.7095	65.6437	1076	1114	1551	55.6466	61.9185	82.3052
AT1G05570	CALS1	callose synthase 1,[Source:TAIR;Acc:AT1G05570]	723	537	616	33.107	28.2179	29.9974	1318	828	895	68.162	46.022	47.494
AT1G05590	HEXO2	beta-hexosaminidase 2,[Source:TAIR;Acc:AT1G05590]	216	196	207	9.8909	10.2993	10.0803	240	190	225	12.4119	10.5606	11.9398
AT1G05600	AT1G05600	Tetratricopeptide repeat (TPR)-like superfamily protein,[Source:TAIR;Acc:AT1G05600]	169	155	124	7.7387	8.1448	6.0384	177	165	195	9.1538	9.171	10.3478
AT1G05620	URH2	uridine-ribohydrolase 2,[Source:TAIR;Acc:AT1G05620]	88	90	99	4.0296	4.7293	4.821	127	109	140	6.568	6.0585	7.4292
AT1G05630	AT5PTASE13	Endonuclease/exonuclease/phosphatase family protein,[Source:TAIR;Acc:AT1G05630]	196	164	141	8.9751	8.6178	6.8663	213	173	203	11.0156	9.6157	10.7724
AT1G05640	AT1G05640	Ankyrin repeat family protein,[Source:TAIR;Acc:AT1G05640]	53	50	35	2.4269	2.6274	1.7044	25	35	13	1.2929	1.9454	0.6899
AT1G05650	AT1G05650	Pectin lyase-like superfamily protein,[Source:TAIR;Acc:AT1G05650]	55	31	30	2.5185	1.629	1.4609	40	46	4	2.0686	2.5568	0.2123
AT1G05660	AT1G05660	Pectin lyase-like superfamily protein,[Source:TAIR;Acc:AT1G05660]	54	50	26	2.4727	2.6274	1.2661	60	59	13	3.103	3.2793	0.6899
AT1G05670	AT1G05670	Pentatricopeptide repeat (PPR-like) superfamily protein,[Source:TAIR;Acc:AT1G05670]	133	120	142	6.0902	6.3057	6.915	105	76	102	5.4302	4.2242	5.4127
AT1G05680	UGT74E2	Uridine diphosphate glycosyltransferase 74E2,[Source:TAIR;Acc:AT1G05680]	3061	2493	1485	140.167	131	72.3152	287	230	565	14.8426	12.7839	29.9822
AT1G05690	BT3	BTB and TAZ domain protein 3,[Source:TAIR;Acc:AT1G05690]	93	109	104	4.2586	5.7277	5.0645	60	63	47	3.103	3.5017	2.4941
AT1G05700	AT1G05700	Leucine-rich repeat transmembrane protein kinase protein,[Source:TAIR;Acc:AT1G05700]	27	48	49	1.2364	2.5223	2.3862	39	48	66	2.0169	2.6679	3.5023
AT1G05710	AT1G05710	basic helix-loop-helix (bHLH) DNA-binding superfamily protein,[Source:TAIR;Acc:AT1G05710]	77	74	145	3.5259	3.8885	7.0611	110	77	106	5.6888	4.2798	5.625
AT1G05720	AT1G05720	selenoprotein family protein,[Source:TAIR;Acc:AT1G05720]	187	203	207	8.563	10.6671	10.0803	138	153	174	7.1368	8.5041	9.2335
AT1G05720	AT1G05720	selenoprotein family protein,[Source:TAIR;Acc:AT1G05720]	95	99	109	4.3502	5.2022	5.308	66	51	78	3.4133	2.8347	4.1391
AT1G05750	PDE247	Tetratricopeptide repeat (TPR)-like superfamily protein,[Source:TAIR;Acc:AT1G05750]	38	57	60	1.7401	2.9952	2.9218	28	41	36	1.4481	2.2789	1.9104
AT1G05750	PDE247	Tetratricopeptide repeat (TPR)-like superfamily protein,[Source:TAIR;Acc:AT1G05750]	135	131	159	6.1818	6.8837	7.7428	120	100	101	6.2059	5.5582	5.3597
AT1G05780	AT1G05780	Vacuolar ATPase assembly integral membrane protein VMA21-like domain,[Source:TAIR;Acc:AT1G05780]	63	61	76	2.8848	3.2054	3.701	94	56	101	4.8613	3.1126	5.3597
AT1G05785	AT1G05785	Got1/Sft2-like vescicle transport protein family,[Source:TAIR;Acc:AT1G05785]	22	18	16	1.0074	0.9459	0.7792	45	58	55	2.3272	3.2238	2.9186
AT1G05790	AT1G05790	lipase class 3 family protein,[Source:TAIR;Acc:AT1G05790]	179	216	158	8.1966	11.3502	7.6941	286	224	311	14.7908	12.4504	16.5035
AT1G05805	AT1G05805	basic helix-loop-helix (bHLH) DNA-binding superfamily protein,[Source:TAIR;Acc:AT1G05805]	143	92	107	6.5481	4.8344	5.2106	128	95	155	6.6197	5.2803	8.2252
AT1G05810	ARA	RAB GTPase homolog A5E,[Source:TAIR;Acc:AT1G05810]	118	89	86	5.4034	4.6767	4.188	169	131	187	8.74	7.2813	9.9233
AT1G05820	SPPL5	SIGNAL PEPTIDE PEPTIDASE-LIKE 5,[Source:TAIR;Acc:AT1G05820]	44	33	31	2.0148	1.7341	1.5096	84	60	45	4.3442	3.3349	2.388
AT1G05830	ATX2	trithorax-like protein 2,[Source:TAIR;Acc:AT1G05830]	474	349	401	21.705	18.339	19.5275	432	410	588	22.3414	22.7887	31.2027
AT1G05835	AT1G05835	PHD finger protein,[Source:TAIR;Acc:AT1G05835]	250	184	224	11.4478	9.6687	10.9081	371	310	381	19.1867	17.2305	20.2181
AT1G05835	AT1G05835	PHD finger protein,[Source:TAIR;Acc:AT1G05835]	140	108	78	6.4108	5.6751	3.7984	53	56	31	2.741	3.1126	1.645
AT1G05850	POM1	Chitinase family protein,[Source:TAIR;Acc:AT1G05850]	5240	4796	5667	239.946	252.017	275.966	6313	6094	6552	326.4844	338.7174	347.6877
AT1G05860	AT1G05860	unknown protein,[Source:TAIR;Acc:AT1G05860]	169	133	137	7.7387	6.9888	6.6715	208	160	204	10.757	8.8931	10.8254
AT1G05870	AT1G05870	Protein of unknown function (DUF1685),[Source:TAIR;Acc:AT1G05870]	689	626	673	31.5501	32.8946	32.7731	480	387	439	24.8238	21.5103	23.2959
AT1G05890	ARI5	RING/U-box superfamily protein,[Source:TAIR;Acc:AT1G05890]	612	434	557	28.0242	22.8055	27.1243	761	680	781	39.356	37.7958	41.4445
AT1G05900	ATNTH2	endonuclease III 2,[Source:TAIR;Acc:AT1G05900]	127	114	122	5.8155	5.9904	5.941	238	178	182	12.3085	9.8936	9.658
AT1G05910	AT1G05910	cell division cycle protein 48-related / CDC48-related,[Source:TAIR;Acc:AT1G05910]	598	688	645	27.3831	36.1526	31.4096	393	371	446	20.3245	20.621	23.6674
AT1G05940	CAT9	cationic amino acid transporter 9,[Source:TAIR;Acc:AT1G05940]	422	375	459	19.3239	19.7052	22.352	712	724	867	36.8219	40.2414	46.0081
AT1G05950	AT1G05950	unknown protein,[Source:TAIR;Acc:AT1G05950]	98	101	86	4.4875	5.3073	4.188	67	67	51	3.465	3.724	2.7064
AT1G05960	AT1G05960	ARM repeat superfamily protein,[Source:TAIR;Acc:AT1G05960]	1014	712	673	46.4323	37.4137	32.7731	1169	971	1086	60.4562	53.9702	57.6295
AT1G05970	AT1G05970	RNA-binding (RRM/RBD/RNP motifs) family protein,[Source:TAIR;Acc:AT1G05970]	59	50	50	2.7017	2.6274	2.4349	103	85	106	5.3268	4.7245	5.625
AT1G06000	AT1G06000	UDP-Glycosyltransferase superfamily protein,[Source:TAIR;Acc:AT1G06000]	2494	2153	2130	114.203	113.134	103.725	529	772	275	27.3579	42.9094	14.5931
AT1G06000	AT1G06000	UDP-Glycosyltransferase superfamily protein,[Source:TAIR;Acc:AT1G06000]	1229	1119	1106	56.2774	58.8004	53.859	362	526	175	18.7213	29.2362	9.2865
AT1G06010	AT1G06010	unknown protein,[Source:TAIR;Acc:AT1G06010]	101	93	115	4.6249	4.8869	5.6002	73	89	119	3.7753	4.9468	6.3148
AT1G06040	STO	B-box zinc finger family protein,[Source:TAIR;Acc:AT1G06040]	4954	3719	4154	226.85	195.423	202.288	4264	3835	3478	220.5179	213.1574	184.5631
AT1G06050	AT1G06050	Protein of unknown function (DUF1336),[Source:TAIR;Acc:AT1G06050]	91	72	89	4.167	3.7834	4.334	78	64	62	4.0339	3.5573	3.2901
AT1G06060	AT1G06060	LisH and RanBPM domains containing protein,[Source:TAIR;Acc:AT1G06060]	82	87	93	3.7549	4.5716	4.5288	229	216	289	11.843	12.0057	15.336
AT1G06060	AT1G06060	LisH and RanBPM domains containing protein,[Source:TAIR;Acc:AT1G06060]	314	262	267	14.3784	13.7674	13.0021	308	276	349	15.9286	15.3407	18.52
AT1G06080	ADS1	delta 9 desaturase 1,[Source:TAIR;Acc:AT1G06080]	67	78	67	3.068	4.0987	3.2627	50	115	62	2.5858	6.3919	3.2901
AT1G06110	SKIP16	SKP1/ASK-interacting protein 16,[Source:TAIR;Acc:AT1G06110]	355	286	326	16.2559	15.0285	15.8752	554	470	588	28.6508	26.1236	31.2027
AT1G06130	GLX2-4	glyoxalase 2-4,[Source:TAIR;Acc:AT1G06130]	185	230	236	8.4714	12.0859	11.4925	278	262	329	14.3771	14.5625	17.4587
AT1G06150	EMB1444	basic helix-loop-helix (bHLH) DNA-binding superfamily protein,[Source:TAIR;Acc:AT1G06150]	855	706	594	39.1515	37.0984	28.9261	422	386	403	21.8242	21.4547	21.3856
AT1G06150	EMB1444	basic helix-loop-helix (bHLH) DNA-binding superfamily protein,[Source:TAIR;Acc:AT1G06150]	792	655	540	36.2666	34.4185	26.2964	385	354	364	19.9107	19.6761	19.316
AT1G06160	ORA59	octadecanoid-responsive Arabidopsis AP2/ERF 59,[Source:TAIR;Acc:AT1G06160]	64	73	51	2.9306	3.836	2.4836	14	12	13	0.724	0.667	0.6899
AT1G06180	ATMYB13	myb domain protein 13,[Source:TAIR;Acc:AT1G06180]	577	390	401	26.4215	20.4935	19.5275	23	31	61	1.1895	1.723	3.237
AT1G06190	AT1G06190	Rho termination factor,[Source:TAIR;Acc:AT1G06190]	2213	1926	1833	101.336	101.206	89.2617	1517	1379	1992	78.4535	76.6477	105.7072
AT1G06200	AT1G06200	Peptidase S24/S26A/S26B/S26C family protein,[Source:TAIR;Acc:AT1G06200]	384	353	385	17.5838	18.5492	18.7484	449	362	527	23.2206	20.1207	27.9657
AT1G06210	AT1G06210	ENTH/VHS/GAT family protein,[Source:TAIR;Acc:AT1G06210]	447	466	512	20.4687	24.487	24.9329	284	223	306	14.6874	12.3948	16.2382
AT1G06220	MEE5	Ribosomal protein S5/Elongation factor G/III/V family protein,[Source:TAIR;Acc:AT1G06220]	1767	1748	1848	80.913	91.8527	89.9922	1332	1128	1465	68.886	62.6966	77.7415
AT1G06230	GTE4	global transcription factor group E4,[Source:TAIR;Acc:AT1G06230]	1191	1112	1024	54.5373	58.4326	49.8658	967	846	799	50.0096	47.0225	42.3996
AT1G06240	AT1G06240	Protein of unknown function DUF455,[Source:TAIR;Acc:AT1G06240]	157	131	140	7.1892	6.8837	6.8176	242	219	186	12.5153	12.1725	9.8703
AT1G06250	AT1G06250	alpha/beta-Hydrolases superfamily protein,[Source:TAIR;Acc:AT1G06250]	47	36	31	2.1522	1.8917	1.5096	38	30	57	1.9652	1.6675	3.0248
AT1G06265	AT1G06265	other RNA,[Source:TAIR;Acc:AT1G06265]	65	41	39	2.9764	2.1544	1.8992	57	55	113	2.9478	3.057	5.9964
AT1G06265	AT1G06265	other RNA,[Source:TAIR;Acc:AT1G06265]	27	17	20	1.2364	0.8933	0.9739	29	25	52	1.4998	1.3896	2.7594
AT1G06270	AT1G06270	Pentatricopeptide repeat (PPR) superfamily protein,[Source:TAIR;Acc:AT1G06270]	111	105	115	5.0828	5.5175	5.6002	42	50	42	2.1721	2.7791	2.2288
AT1G06290	ACX3	acyl-CoA oxidase 3,[Source:TAIR;Acc:AT1G06290]	849	790	987	38.8767	41.5124	48.064	1201	996	1478	62.1112	55.3598	78.4314
AT1G06350	AT1G06350	Fatty acid desaturase family protein,[Source:TAIR;Acc:AT1G06350]	42	47	94	1.9232	2.4697	4.5775	53	30	72	2.741	1.6675	3.8207
AT1G06360	AT1G06360	Fatty acid desaturase family protein,[Source:TAIR;Acc:AT1G06360]	322	133	62	14.7448	6.9888	3.0192	200	133	93	10.3432	7.3924	4.9351
AT1G06380	AT1G06380	Ribosomal protein L1p/L10e family,[Source:TAIR;Acc:AT1G06380]	378	329	314	17.3091	17.2881	15.2909	119	95	128	6.1542	5.2803	6.7924
AT1G06390	GSK1	GSK3/SHAGGY-like protein kinase 1,[Source:TAIR;Acc:AT1G06390]	451	425	417	20.6518	22.3326	20.3067	998	924	1129	51.6128	51.3579	59.9114
AT1G06390	GSK1	GSK3/SHAGGY-like protein kinase 1,[Source:TAIR;Acc:AT1G06390]	666	630	633	30.4969	33.1048	30.8252	802	711	797	41.4764	39.5189	42.2935
AT1G06410	ATTPS7	trehalose-phosphatase/synthase 7,[Source:TAIR;Acc:AT1G06410]	3531	2952	3377	161.689	155.12	164.45	3465	2718	3150	179.1966	151.0722	167.1575
AT1G06430	FTSH8	FTSH protease 8,[Source:TAIR;Acc:AT1G06430]	4963	4236	4870	227.262	222.59	237.155	6338	7360	5318	327.7773	409.0843	282.2044
AT1G06450	AT1G06450	Polynucleotidyl transferase, ribonuclease H-like superfamily protein,[Source:TAIR;Acc:AT1G06450]	144	136	132	6.5939	7.1464	6.428	71	77	101	3.6719	4.2798	5.3597
AT1G06450	AT1G06450	Polynucleotidyl transferase, ribonuclease H-like superfamily protein,[Source:TAIR;Acc:AT1G06450]	178	139	210	8.1508	7.3041	10.2264	477	511	509	24.6686	28.4025	27.0105
AT1G06470	AT1G06470	Nucleotide/sugar transporter family protein,[Source:TAIR;Acc:AT1G06470]	182	171	169	8.334	8.9856	8.2298	276	225	246	14.2737	12.506	13.0542
AT1G06490	ATGSL07	glucan synthase-like 7,[Source:TAIR;Acc:AT1G06490]	85	99	101	3.8923	5.2022	4.9184	59	68	67	3.0513	3.7796	3.5554
AT1G06500	AT1G06500	unknown protein,[Source:TAIR;Acc:AT1G06500]	70	94	89	3.2054	4.9395	4.334	139	144	172	7.1886	8.0038	9.1273
AT1G06500	AT1G06500	unknown protein,[Source:TAIR;Acc:AT1G06500]	139	122	168	6.365	6.4108	8.1811	161	112	160	8.3263	6.2252	8.4905
AT1G06510	AT1G06510	unknown protein,[Source:TAIR;Acc:AT1G06510]	170	188	156	7.7845	9.8789	7.5967	312	300	384	16.1355	16.6746	20.3773
AT1G06520	ATGPAT1	glycerol-3-phosphate acyltransferase 1,[Source:TAIR;Acc:AT1G06520]	15	28	62	0.6869	1.4713	3.0192	24	8	57	1.2412	0.4447	3.0248
AT1G06530	AT1G06530	Tropomyosin-related,[Source:TAIR;Acc:AT1G06530]	2228	2112	1846	102.023	110.98	89.8948	678	709	779	35.0636	39.4077	41.3383
AT1G06550	AT1G06550	ATP-dependent caseinolytic (Clp) protease/crotonase family protein,[Source:TAIR;Acc:AT1G06550]	170	165	154	7.7845	8.6703	7.4994	530	646	456	27.4096	35.906	24.198
AT1G06560	AT1G06560	NOL1/NOP2/sun family protein,[Source:TAIR;Acc:AT1G06560]	300	233	238	13.7374	12.2435	11.5899	240	187	289	12.4119	10.3939	15.336
AT1G06560	AT1G06560	NOL1/NOP2/sun family protein,[Source:TAIR;Acc:AT1G06560]	2746	1860	2252	125.743	97.738	109.666	2142	1833	1870	110.7761	101.882	99.2332
AT1G06580	AT1G06580	Pentatricopeptide repeat (PPR) superfamily protein,[Source:TAIR;Acc:AT1G06580]	26	21	35	1.1906	1.1035	1.7044	42	39	55	2.1721	2.1677	2.9186
AT1G06590	AT1G06590	unknown protein,[Source:TAIR;Acc:AT1G06590]	107	129	107	4.8997	6.7786	5.2106	136	122	129	7.0334	6.781	6.8455
AT1G06620	AT1G06620	2-oxoglutarate (2OG) and Fe(II)-dependent oxygenase superfamily protein,[Source:TAIR;Acc:AT1G06620]	126	174	130	5.7697	9.1432	6.3306	78	84	85	4.0339	4.6689	4.5106
AT1G06630	AT1G06630	F-box/RNI-like superfamily protein,[Source:TAIR;Acc:AT1G06630]	322	252	267	14.7448	13.2419	13.0021	334	280	441	17.2732	15.563	23.4021
AT1G06640	AT1G06640	2-oxoglutarate (2OG) and Fe(II)-dependent oxygenase superfamily protein,[Source:TAIR;Acc:AT1G06640]	934	786	838	42.769	41.3022	40.8081	999	829	757	51.6645	46.0776	40.1709
AT1G06645	AT1G06645	2-oxoglutarate (2OG) and Fe(II)-dependent oxygenase superfamily protein,[Source:TAIR;Acc:AT1G06645]	86	81	123	3.938	4.2563	5.9897	192	180	178	9.9295	10.0048	9.4457
AT1G06650	AT1G06650	2-oxoglutarate (2OG) and Fe(II)-dependent oxygenase superfamily protein,[Source:TAIR;Acc:AT1G06650]	48	56	43	2.198	2.9427	2.094	32	37	39	1.6549	2.0565	2.0696
AT1G06650	AT1G06650	2-oxoglutarate (2OG) and Fe(II)-dependent oxygenase superfamily protein,[Source:TAIR;Acc:AT1G06650]	908	894	1116	41.5784	46.9773	54.3459	1094	1017	1117	56.5775	56.527	59.2746
AT1G06670	NIH	nuclear DEIH-boxhelicase,[Source:TAIR;Acc:AT1G06670]	1859	1925	1854	85.1258	101.154	90.2844	956	781	1042	49.4407	43.4096	55.2946
AT1G06680	PSBP-1	photosystem II subunit P-1,[Source:TAIR;Acc:AT1G06680]	25632	22664	25102	1173.72	1190.93	1222.39	52209	49449	44712	2700.0512	2748.4798	2372.6817
AT1G06690	AT1G06690	NAD(P)-linked oxidoreductase superfamily protein,[Source:TAIR;Acc:AT1G06690]	554	474	457	25.3683	24.9074	22.2546	1202	1212	1022	62.1629	67.3655	54.2333
AT1G06700	AT1G06700	Protein kinase superfamily protein,[Source:TAIR;Acc:AT1G06700]	548	540	531	25.0936	28.3756	25.8581	852	659	1043	44.0622	36.6286	55.3477
AT1G06710	AT1G06710	Tetratricopeptide repeat (TPR)-like superfamily protein,[Source:TAIR;Acc:AT1G06710]	124	137	94	5.6781	7.199	4.5775	68	70	98	3.5167	3.8907	5.2005
AT1G06720	AT1G06720	P-loop containing nucleoside triphosphate hydrolases superfamily protein,[Source:TAIR;Acc:AT1G06720]	1199	1152	1103	54.9036	60.5345	53.7129	397	411	551	20.5313	22.8442	29.2393
AT1G06730	AT1G06730	pfkB-like carbohydrate kinase family protein,[Source:TAIR;Acc:AT1G06730]	260	289	233	11.9057	15.1862	11.3464	269	232	317	13.9117	12.895	16.8219
AT1G06740	AT1G06740	transposable element gene,[Source:TAIR;Acc:AT1G06740]	131	102	158	5.9987	5.3598	7.6941	70	67	69	3.6201	3.724	3.6615
AT1G06740	AT1G06740	transposable element gene,[Source:TAIR;Acc:AT1G06740]	27	27	36	1.2364	1.4188	1.7531	18	15	14	0.9309	0.8337	0.7429
AT1G06750	AT1G06750	P-loop containing nucleoside triphosphate hydrolases superfamily protein,[Source:TAIR;Acc:AT1G06750]	1676	1456	1011	76.746	76.5089	49.2327	2189	2054	1804	113.2068	114.1657	95.7308
AT1G06770	DRIP1	DREB2A-interacting protein 1,[Source:TAIR;Acc:AT1G06770]	124	107	118	5.6781	5.6226	5.7463	117	112	128	6.0508	6.2252	6.7924
AT1G06780	GAUT6	galacturonosyltransferase 6,[Source:TAIR;Acc:AT1G06780]	204	234	202	9.3414	12.2961	9.8368	260	247	221	13.4462	13.7288	11.7276
AT1G06790	AT1G06790	RNA polymerase Rpb7 N-terminal domain-containing protein,[Source:TAIR;Acc:AT1G06790]	109	118	125	4.9912	6.2006	6.0871	121	92	131	6.2577	5.1136	6.9516
AT1G06790	AT1G06790	RNA polymerase Rpb7 N-terminal domain-containing protein,[Source:TAIR;Acc:AT1G06790]	357	313	371	16.3475	16.4473	18.0666	181	168	171	9.3606	9.3378	9.0743
AT1G06820	CRTISO	carotenoid isomerase,[Source:TAIR;Acc:AT1G06820]	348	285	320	15.9353	14.976	15.5831	549	520	580	28.3922	28.9027	30.7782
AT1G06830	AT1G06830	Glutaredoxin family protein,[Source:TAIR;Acc:AT1G06830]	73	91	21	3.3428	4.7818	1.0226	88	121	27	4.551	6.7254	1.4328
AT1G06840	AT1G06840	Leucine-rich repeat protein kinase family protein,[Source:TAIR;Acc:AT1G06840]	246	271	259	11.2646	14.2403	12.6125	379	368	385	19.6004	20.4542	20.4304
AT1G06850	AtbZIP52	basic leucine-zipper 52,[Source:TAIR;Acc:AT1G06850]	93	92	79	4.2586	4.8344	3.8471	153	126	142	7.9126	7.0033	7.5354
AT1G06870	AT1G06870	Peptidase S24/S26A/S26B/S26C family protein,[Source:TAIR;Acc:AT1G06870]	192	218	168	8.7919	11.4553	8.1811	314	288	333	16.2389	16.0076	17.6709
AT1G06890	AT1G06890	nodulin MtN21 /EamA-like transporter family protein,[Source:TAIR;Acc:AT1G06890]	287	301	300	13.1421	15.8167	14.6091	406	354	475	20.9968	19.6761	25.2063
AT1G06900	AT1G06900	Insulinase (Peptidase family M16) family protein,[Source:TAIR;Acc:AT1G06900]	774	821	767	35.4424	43.1413	37.3507	789	674	964	40.8041	37.4623	51.1555
AT1G06910	TRFL7	TRF-like 7,[Source:TAIR;Acc:AT1G06910]	65	69	59	2.9764	3.6258	2.8731	75	71	68	3.8787	3.9463	3.6085
AT1G06950	ATTIC110	translocon at the inner envelope membrane of chloroplasts 110,[Source:TAIR;Acc:AT1G06950]	3764	3282	3154	172.358	172.46	153.591	3721	3707	5102	192.436	206.0429	270.7421
AT1G06960	AT1G06960	RNA-binding (RRM/RBD/RNP motifs) family protein,[Source:TAIR;Acc:AT1G06960]	114	90	111	5.2202	4.7293	5.4054	144	111	142	7.4471	6.1696	7.5354
AT1G06980	AT1G06980	unknown protein,[Source:TAIR;Acc:AT1G06980]	66	30	27	3.0222	1.5764	1.3148	35	29	23	1.8101	1.6119	1.2205
AT1G07000	ATEXO70B2	exocyst subunit exo70 family protein B2,[Source:TAIR;Acc:AT1G07000]	204	140	166	9.3414	7.3566	8.0837	242	152	194	12.5153	8.4485	10.2948
AT1G07010	AT1G07010	Calcineurin-like metallo-phosphoesterase superfamily protein,[Source:TAIR;Acc:AT1G07010]	95	125	103	4.3502	6.5684	5.0158	173	141	158	8.9469	7.8371	8.3844
AT1G07010	AT1G07010	Calcineurin-like metallo-phosphoesterase superfamily protein,[Source:TAIR;Acc:AT1G07010]	915	784	846	41.8989	41.1971	41.1977	1240	1178	1003	64.1281	65.4757	53.2251
AT1G07030	AT1G07030	Mitochondrial substrate carrier family protein,[Source:TAIR;Acc:AT1G07030]	552	441	445	25.2767	23.1734	21.6702	350	379	393	18.1007	21.0656	20.8549
AT1G07040	AT1G07040	unknown protein,[Source:TAIR;Acc:AT1G07040]	292	259	267	13.371	13.6098	13.0021	318	258	456	16.4458	14.3402	24.198
AT1G07070	AT1G07070	Ribosomal protein L35Ae family protein,[Source:TAIR;Acc:AT1G07070]	88	121	90	4.0296	6.3582	4.3827	153	157	198	7.9126	8.7264	10.507
AT1G07080	AT1G07080	Thioredoxin superfamily protein,[Source:TAIR;Acc:AT1G07080]	691	656	831	31.6417	34.471	40.4673	1178	1076	1207	60.9217	59.8064	64.0505
AT1G07090	LSH6	Protein of unknown function (DUF640),[Source:TAIR;Acc:AT1G07090]	293	266	315	13.4168	13.9776	15.3396	108	78	144	5.5853	4.3354	7.6415
AT1G07110	F2KP	fructose-2,6-bisphosphatase,[Source:TAIR;Acc: AT1G07110]	694	588	745	31.7791	30.8978	36.2793	1957	1858	1993	101.2086	103.2716	105.7603
AT1G07119	AT1G07119	other RNA,[Source:TAIR;Acc:AT1G07119]	25	22	22	1.1448	1.156	1.0713	48	26	49	2.4824	1.4451	2.6002
AT1G07119	AT1G07119	other RNA,[Source:TAIR;Acc:AT1G07119]	22	20	21	1.0074	1.051	1.0226	43	24	42	2.2238	1.334	2.2288
AT1G07128	AT1G07128	Potential natural antisense gene, locus overlaps with AT1G07130,[Source:TAIR;Acc:AT1G07128]	88	71	62	4.0296	3.7309	3.0192	71	57	72	3.6719	3.1682	3.8207
AT1G07128	AT1G07128	Potential natural antisense gene, locus overlaps with AT1G07130,[Source:TAIR;Acc:AT1G07128]	99	80	72	4.5333	4.2038	3.5062	76	59	76	3.9304	3.2793	4.033
AT1G07135	AT1G07135	glycine-rich protein,[Source:TAIR;Acc:AT1G07135]	79	57	88	3.6175	2.9952	4.2853	73	32	63	3.7753	1.7786	3.3432
AT1G07140	SIRANBP	Pleckstrin homology (PH) domain superfamily protein,[Source:TAIR;Acc:AT1G07140]	3329	3623	3355	152.439	190.379	163.379	2121	1834	2556	109.6901	101.9376	135.6364
AT1G07150	MAPKKK13	mitogen-activated protein kinase kinase kinase 13,[Source:TAIR;Acc:AT1G07150]	329	206	198	15.0653	10.8247	9.642	53	56	41	2.741	3.1126	2.1757
AT1G07170	AT1G07170	PHF5-like protein,[Source:TAIR;Acc:AT1G07170]	179	175	142	8.1966	9.1958	6.915	153	129	208	7.9126	7.1701	11.0377
AT1G07180	ATNDI1	alternative NAD(P)H dehydrogenase 1,[Source:TAIR;Acc:AT1G07180]	1817	1352	1736	83.2026	71.044	84.5381	3411	3456	2103	176.404	192.0918	111.5975
AT1G07200	AT1G07200	Double Clp-N motif-containing P-loop nucleoside triphosphate hydrolases superfamily protein,[Source:TAIR;Acc:AT1G07200]	810	706	754	37.0909	37.0984	36.7176	546	511	498	28.237	28.4025	26.4268
AT1G07210	AT1G07210	Ribosomal protein S18,[Source:TAIR;Acc:AT1G07210]	187	178	236	8.563	9.3534	11.4925	128	108	153	6.6197	6.0029	8.1191
AT1G07210	AT1G07210	Ribosomal protein S18,[Source:TAIR;Acc:AT1G07210]	440	473	481	20.1481	24.8549	23.4233	387	316	461	20.0142	17.5639	24.4634
AT1G07230	NPC1	non-specific phospholipase C1,[Source:TAIR;Acc:AT1G07230]	331	297	409	15.1569	15.6066	19.9171	529	446	507	27.3579	24.7896	26.9044
AT1G07240	UGT71C5	UDP-glucosyl transferase 71C5,[Source:TAIR;Acc:AT1G07240]	518	401	385	23.7198	21.0715	18.7484	269	223	265	13.9117	12.3948	14.0625
AT1G07250	UGT71C4	UDP-glucosyl transferase 71C4,[Source:TAIR;Acc:AT1G07250]	1569	1010	1087	71.8464	53.0728	52.9337	853	744	688	44.1139	41.3531	36.5093
AT1G07260	UGT71C3	UDP-glucosyl transferase 71C3,[Source:TAIR;Acc:AT1G07260]	143	132	94	6.5481	6.9363	4.5775	63	59	45	3.2581	3.2793	2.388
AT1G07280	AT1G07280	Tetratricopeptide repeat (TPR)-like superfamily protein,[Source:TAIR;Acc:AT1G07280]	290	260	340	13.2794	13.6623	16.557	586	726	367	30.3057	40.3526	19.4752
AT1G07300	AT1G07300	josephin protein-related,[Source:TAIR;Acc:AT1G07300]	53	35	32	2.4269	1.8392	1.5583	37	28	32	1.9135	1.5563	1.6981
AT1G07310	AT1G07310	Calcium-dependent lipid-binding (CaLB domain) family protein,[Source:TAIR;Acc:AT1G07310]	548	401	467	25.0936	21.0715	22.7415	660	577	668	34.1327	32.0709	35.448
AT1G07320	RPL4	ribosomal protein L4,[Source:TAIR;Acc:AT1G07320]	8237	6211	5988	377.182	326.371	291.598	7863	6776	7666	406.6445	376.6244	406.803
AT1G07350	AT1G07350	RNA-binding (RRM/RBD/RNP motifs) family protein,[Source:TAIR;Acc:AT1G07350]	1185	1161	1294	54.2626	61.0074	63.014	1313	741	1661	67.9034	41.1863	88.1424
AT1G07360	AT1G07360	CCCH-type zinc fingerfamily protein with RNA-binding domain,[Source:TAIR;Acc:AT1G07360]	1078	981	1024	49.3629	51.5489	49.8658	849	725	993	43.9071	40.297	52.6944
AT1G07370	PCNA1	proliferating cellular nuclear antigen 1,[Source:TAIR;Acc:AT1G07370]	244	242	204	11.173	12.7165	9.9342	209	142	215	10.8087	7.8927	11.4092
AT1G07380	AT1G07380	Neutral/alkaline non-lysosomal ceramidase,[Source:TAIR;Acc:AT1G07380]	178	174	185	8.1508	9.1432	9.009	189	203	198	9.7744	11.2832	10.507
AT1G07390	AtRLP1	receptor like protein 1,[Source:TAIR;Acc:AT1G07390]	151	143	251	6.9145	7.5143	12.223	65	46	95	3.3616	2.5568	5.0413
AT1G07400	AT1G07400	HSP20-like chaperones superfamily protein,[Source:TAIR;Acc:AT1G07400]	237	336	502	10.8525	17.6559	24.4459	81	60	159	4.189	3.3349	8.4375
AT1G07410	ATRABA2B	RAB GTPase homolog A2B,[Source:TAIR;Acc:AT1G07410]	14	30	26	0.6411	1.5764	1.2661	16	31	17	0.8275	1.723	0.9021
AT1G07420	ATSMO2	sterol 4-alpha-methyl-oxidase 2-1,[Source:TAIR;Acc:AT1G07420]	138	147	111	6.3192	7.7245	5.4054	219	215	232	11.3258	11.9502	12.3113
AT1G07440	AT1G07440	NAD(P)-binding Rossmann-fold superfamily protein,[Source:TAIR;Acc:AT1G07440]	223	271	317	10.2114	14.2403	15.437	335	392	500	17.3249	21.7882	26.5329
AT1G07450	AT1G07450	NAD(P)-binding Rossmann-fold superfamily protein,[Source:TAIR;Acc:AT1G07450]	30	27	43	1.3737	1.4188	2.094	65	85	65	3.3616	4.7245	3.4493
AT1G07470	AT1G07470	Transcription factor IIA, alpha/beta subunit,[Source:TAIR;Acc:AT1G07470]	180	146	178	8.2424	7.6719	8.6681	298	258	311	15.4114	14.3402	16.5035
AT1G07476	AT1G07476	unknown protein,[Source:TAIR;Acc:AT1G07476]	181	187	171	8.2882	9.8264	8.3272	379	305	323	19.6004	16.9525	17.1403
AT1G07485	AT1G07485	unknown protein,[Source:TAIR;Acc:AT1G07485]	34	26	19	1.5569	1.3662	0.9252	37	31	24	1.9135	1.723	1.2736
AT1G07485	AT1G07485	unknown protein,[Source:TAIR;Acc:AT1G07485]	35	27	19	1.6027	1.4188	0.9252	39	31	25	2.0169	1.723	1.3266
AT1G07500	AT1G07500	unknown protein,[Source:TAIR;Acc:AT1G07500]	73	46	180	3.3428	2.4172	8.7655	24	23	26	1.2412	1.2784	1.3797
AT1G07510	ftsh10	FTSH protease 10,[Source:TAIR;Acc:AT1G07510]	1469	1146	1414	67.2672	60.2192	68.8577	774	648	790	40.0283	36.0172	41.922
AT1G07520	AT1G07520	GRAS family transcription factor,[Source:TAIR;Acc:AT1G07520]	170	162	150	7.7845	8.5127	7.3046	135	107	145	6.9817	5.9473	7.6946
AT1G07530	SCL14	SCARECROW-like 14,[Source:TAIR;Acc:AT1G07530]	587	540	659	26.8794	28.3756	32.0914	616	478	614	31.8572	26.5682	32.5825
AT1G07560	AT1G07560	Leucine-rich repeat protein kinase family protein,[Source:TAIR;Acc:AT1G07560]	26	13	18	1.1906	0.6831	0.8765	86	77	38	4.4476	4.2798	2.0165
AT1G07570	APK1A	Protein kinase superfamily protein,[Source:TAIR;Acc:AT1G07570]	316	299	269	14.47	15.7116	13.0995	367	273	429	18.9798	15.1739	22.7653
AT1G07590	AT1G07590	Tetratricopeptide repeat (TPR)-like superfamily protein,[Source:TAIR;Acc:AT1G07590]	10329	10050	9553	472.977	528.101	465.203	13256	13522	10213	685.55	751.5813	541.9618
AT1G07590	AT1G07590	Tetratricopeptide repeat (TPR)-like superfamily protein,[Source:TAIR;Acc:AT1G07590]	15647	14776	13822	716.495	776.439	673.091	20839	20808	15979	1077.7139	1156.5526	847.9397
AT1G07610	MT1C	metallothionein 1C,[Source:TAIR;Acc:AT1G07610]	1706	1699	1376	78.1198	89.2779	67.0072	3055	2913	1818	157.993	161.9107	96.4738
AT1G07615	AT1G07615	GTP-binding protein Obg/CgtA,[Source:TAIR;Acc:AT1G07615]	183	140	159	8.3798	7.3566	7.7428	99	86	141	5.1199	4.7801	7.4823
AT1G07630	PLL5	pol-like 5,[Source:TAIR;Acc:AT1G07630]	334	322	364	15.2943	16.9202	17.7257	293	219	335	15.1528	12.1725	17.7771
AT1G07640	OBP2	Dof-type zinc finger DNA-binding family protein,[Source:TAIR;Acc:AT1G07640]	512	404	326	23.4451	21.2291	15.8752	252	276	140	13.0325	15.3407	7.4292
AT1G07650	AT1G07650	Leucine-rich repeat transmembrane protein kinase,[Source:TAIR;Acc:AT1G07650]	303	340	351	13.8747	17.8661	17.0927	450	319	506	23.2723	17.7307	26.8513
AT1G07660	AT1G07660	Histone superfamily protein,[Source:TAIR;Acc:AT1G07660]	375	353	271	17.1717	18.5492	13.1969	322	309	295	16.6526	17.1749	15.6544
AT1G07670	ATECA4	endomembrane-type CA-ATPase 4,[Source:TAIR;Acc:AT1G07670]	1004	1113	1006	45.9743	58.4852	48.9893	935	855	1064	48.3546	47.5227	56.4621
AT1G07700	AT1G07700	Thioredoxin superfamily protein,[Source:TAIR;Acc:AT1G07700]	511	461	533	23.3993	24.2243	25.9555	700	648	676	36.2013	36.0172	35.8725
AT1G07705	AT1G07705	NOT2 / NOT3 / NOT5 family,[Source:TAIR;Acc:AT1G07705]	263	233	265	12.0431	12.2435	12.9047	238	244	314	12.3085	13.562	16.6627
AT1G07710	AT1G07710	Ankyrin repeat family protein,[Source:TAIR;Acc:AT1G07710]	23	18	20	1.0532	0.9459	0.9739	5	13	13	0.2586	0.7226	0.6899
AT1G07720	KCS3	3-ketoacyl-CoA synthase 3,[Source:TAIR;Acc:AT1G07720]	946	863	909	43.3185	45.3483	44.2656	978	929	884	50.5784	51.6358	46.9102
AT1G07725	ATEXO70H6	exocyst subunit exo70 family protein H6,[Source:TAIR;Acc:AT1G07725]	265	162	181	12.1347	8.5127	8.8142	249	219	277	12.8773	12.1725	14.6992
AT1G07725	ATEXO70H6	exocyst subunit exo70 family protein H6,[Source:TAIR;Acc:AT1G07725]	265	162	182	12.1347	8.5127	8.8629	248	217	273	12.8256	12.0613	14.487
AT1G07740	AT1G07740	Tetratricopeptide repeat (TPR)-like superfamily protein,[Source:TAIR;Acc:AT1G07740]	169	130	116	7.7387	6.8312	5.6489	115	125	70	5.9474	6.9478	3.7146
AT1G07740	AT1G07740	Tetratricopeptide repeat (TPR)-like superfamily protein,[Source:TAIR;Acc:AT1G07740]	105	79	52	4.8081	4.1512	2.5323	76	105	37	3.9304	5.8361	1.9634
AT1G07745	ATRAD51D	homolog of RAD51 D,[Source:TAIR;Acc:AT1G07745]	48	41	40	2.198	2.1544	1.9479	76	74	68	3.9304	4.1131	3.6085
AT1G07750	AT1G07750	RmlC-like cupins superfamily protein,[Source:TAIR;Acc:AT1G07750]	544	524	640	24.9104	27.5348	31.1661	480	432	530	24.8238	24.0115	28.1249
AT1G07770	RPS15A	ribosomal protein S15A,[Source:TAIR;Acc:AT1G07770]	2618	3098	2443	119.881	162.792	118.967	3127	2813	3568	161.7166	156.3525	189.3391
AT1G07780	PAI1	phosphoribosylanthranilate isomerase 1,[Source:TAIR;Acc:AT1G07780]	258	252	274	11.8141	13.2419	13.343	196	241	214	10.1364	13.3953	11.3561
AT1G07790	HTB1	Histone superfamily protein,[Source:TAIR;Acc:AT1G07790]	988	747	441	45.2417	39.2528	21.4754	335	356	291	17.3249	19.7872	15.4422
AT1G07810	ECA1	ER-type Ca2+-ATPase 1,[Source:TAIR;Acc:AT1G07810]	1070	992	989	48.9966	52.1269	48.1614	993	837	1184	51.3542	46.5222	62.83
AT1G07820	AT1G07820	Histone superfamily protein,[Source:TAIR;Acc:AT1G07820]	1016	844	593	46.5238	44.3499	28.8774	536	538	446	27.7199	29.9032	23.6674
AT1G07830	AT1G07830	ribosomal protein L29 family protein,[Source:TAIR;Acc:AT1G07830]	272	246	227	12.4552	12.9266	11.0542	176	159	207	9.1021	8.8376	10.9846
AT1G07840	AT1G07840	Sas10/Utp3/C1D family,[Source:TAIR;Acc:AT1G07840]	321	296	310	14.699	15.554	15.0961	153	151	225	7.9126	8.3929	11.9398
AT1G07870	AT1G07870	Protein kinase superfamily protein,[Source:TAIR;Acc:AT1G07870]	186	186	200	8.5172	9.7738	9.7394	210	153	167	10.8604	8.5041	8.862
AT1G07880	ATMPK13	Protein kinase superfamily protein,[Source:TAIR;Acc:AT1G07880]	32	25	53	1.4653	1.3137	2.581	19	32	37	0.9826	1.7786	1.9634
AT1G07890	APX1	ascorbate peroxidase 1,[Source:TAIR;Acc:AT1G07890]	2958	2854	2939	135.45	149.97	143.121	5678	5634	6461	293.6446	313.1496	342.8587
AT1G07910	ATRNL	RNAligase,[Source:TAIR;Acc:AT1G07910]	178	187	203	8.1508	9.8264	9.8855	183	176	223	9.4641	9.7825	11.8337
AT1G07920	AT1G07920	GTP binding Elongation factor Tu family protein,[Source:TAIR;Acc:AT1G07920]	16673	17233	16447	763.476	905.548	800.921	13417	11274	15225	693.8763	626.6327	807.928
AT1G07930	AT1G07930	GTP binding Elongation factor Tu family protein,[Source:TAIR;Acc:AT1G07930]	14212	15036	13909	650.784	790.101	677.328	11433	10469	13515	591.2713	581.8891	717.1854
AT1G07940	AT1G07940	GTP binding Elongation factor Tu family protein,[Source:TAIR;Acc:AT1G07940]	13257	14162	12992	607.054	744.175	632.672	12685	10696	14391	656.02	594.5063	763.6711
AT1G07950	MED22B	Surfeit locus protein 5 subunit 22 of Mediator complex,[Source:TAIR;Acc:AT1G07950]	174	196	154	7.9677	10.2993	7.4994	180	160	196	9.3089	8.8931	10.4009
AT1G07960	ATPDIL5-1	PDI-like 5-1,[Source:TAIR;Acc:AT1G07960]	264	267	267	12.0889	14.0301	13.0021	225	216	256	11.6361	12.0057	13.5849
AT1G07970	AT1G07970	No description	307	252	254	14.0579	13.2419	12.3691	243	252	275	12.567	14.0067	14.5931
AT1G07980	NF-YC10	nuclear factor Y, subunit C10,[Source:TAIR;Acc:AT1G07980]	238	238	254	10.8983	12.5063	12.3691	203	167	220	10.4984	9.2822	11.6745
AT1G07985	AT1G07985	Expressed protein,[Source:TAIR;Acc:AT1G07985]	88	80	65	4.0296	4.2038	3.1653	65	47	49	3.3616	2.6124	2.6002
AT1G07990	AT1G07990	SIT4 phosphatase-associated family protein,[Source:TAIR;Acc:AT1G07990]	588	552	568	26.9252	29.0061	27.6599	644	590	621	33.3052	32.7934	32.9539
AT1G08000	GATA10	GATA transcription factor 10,[Source:TAIR;Acc:AT1G08000]	158	146	125	7.235	7.6719	6.0871	134	102	109	6.93	5.6694	5.7842
AT1G08010	GATA11	GATA transcription factor 11,[Source:TAIR;Acc:AT1G08010]	260	249	245	11.9057	13.0843	11.9308	272	235	268	14.0668	13.0618	14.2217
AT1G08030	TPST	tyrosylprotein sulfotransferase,[Source:TAIR;Acc:AT1G08030]	145	143	132	6.6397	7.5143	6.428	187	172	201	9.6709	9.5601	10.6662
AT1G08040	AT1G08040	Protein of unknown function (DUF707),[Source:TAIR;Acc:AT1G08040]	111	74	105	5.0828	3.8885	5.1132	150	170	154	7.7574	9.449	8.1721
AT1G08050	AT1G08050	Zinc finger (C3HC4-type RING finger) family protein,[Source:TAIR;Acc:AT1G08050]	210	173	169	9.6162	9.0907	8.2298	64	89	91	3.3098	4.9468	4.829
AT1G08060	MOM	ATP-dependent helicase family protein,[Source:TAIR;Acc:AT1G08060]	401	345	408	18.3623	18.1288	19.8684	413	426	434	21.3588	23.678	23.0306
AT1G08070	OTP82	Tetratricopeptide repeat (TPR)-like superfamily protein,[Source:TAIR;Acc:AT1G08070]	24	21	24	1.099	1.1035	1.1687	15	15	18	0.7757	0.8337	0.9552
AT1G08110	AT1G08110	lactoylglutathione lyase family protein / glyoxalase I family protein,[Source:TAIR;Acc:AT1G08110]	495	425	432	22.6666	22.3326	21.0371	941	861	1033	48.6649	47.8562	54.8171
AT1G08120	AT1G08120	No description	90	92	109	4.1212	4.8344	5.308	139	105	156	7.1886	5.8361	8.2783
AT1G08130	ATLIG1	DNA ligase 1,[Source:TAIR;Acc:AT1G08130]	382	385	402	17.4922	20.2307	19.5762	398	367	356	20.583	20.3986	18.8915
AT1G08160	AT1G08160	Late embryogenesis abundant (LEA) hydroxyproline-rich glycoprotein family,[Source:TAIR;Acc:AT1G08160]	152	149	143	6.9603	7.8296	6.9637	136	148	84	7.0334	8.2262	4.4575
AT1G08180	AT1G08180	unknown protein,[Source:TAIR;Acc:AT1G08180]	81	93	90	3.7091	4.8869	4.3827	41	28	47	2.1204	1.5563	2.4941
AT1G08190	ATVPS41	vacuolar protein sorting 41,[Source:TAIR;Acc:AT1G08190]	1649	1441	1589	75.5097	75.7207	77.3797	1722	1678	1535	89.0553	93.2668	81.4561
AT1G08200	AXS2	UDP-D-apiose/UDP-D-xylose synthase 2,[Source:TAIR;Acc:AT1G08200]	1324	1169	1197	60.6275	61.4278	58.2904	2927	2540	2532	151.3733	141.1786	134.3628
AT1G08210	AT1G08210	Eukaryotic aspartyl protease family protein,[Source:TAIR;Acc:AT1G08210]	137	130	127	6.2734	6.8312	6.1845	223	182	216	11.5327	10.1159	11.4622
AT1G08220	AT1G08220	No description	91	101	92	4.167	5.3073	4.4801	67	55	81	3.465	3.057	4.2983
AT1G08230	AT1G08230	Transmembrane amino acid transporter family protein,[Source:TAIR;Acc:AT1G08230]	433	234	352	19.8276	12.2961	17.1414	195	178	191	10.0847	9.8936	10.1356
AT1G08250	ADT6	arogenate dehydratase 6,[Source:TAIR;Acc:AT1G08250]	567	346	407	25.9636	18.1814	19.8197	277	318	153	14.3254	17.6751	8.1191
AT1G08260	EMB142	DNA polymerase epsilon catalytic subunit,[Source:TAIR;Acc:AT1G08260]	65	78	124	2.9764	4.0987	6.0384	59	33	97	3.0513	1.8342	5.1474
AT1G08260	EMB142	DNA polymerase epsilon catalytic subunit,[Source:TAIR;Acc:AT1G08260]	208	245	436	9.5246	12.8741	21.2319	382	278	546	19.7556	15.4518	28.974
AT1G08280	AT1G08280	Glycosyltransferase family 29 (sialyltransferase) family protein,[Source:TAIR;Acc:AT1G08280]	165	170	145	7.5556	8.933	7.0611	117	109	134	6.0508	6.0585	7.1108
AT1G08290	WIP3	WIP domain protein 3,[Source:TAIR;Acc:AT1G08290]	38	25	51	1.7401	1.3137	2.4836	9	10	14	0.4654	0.5558	0.7429
AT1G08300	NVL	no vein-like,[Source:TAIR;Acc:AT1G08300]	112	102	94	5.1286	5.3598	4.5775	90	85	117	4.6545	4.7245	6.2087
AT1G08300	NVL	no vein-like,[Source:TAIR;Acc:AT1G08300]	34	26	28	1.5569	1.3662	1.3635	21	24	23	1.086	1.334	1.2205
AT1G08310	AT1G08310	alpha/beta-Hydrolases superfamily protein,[Source:TAIR;Acc:AT1G08310]	169	131	197	7.7387	6.8837	9.5933	249	207	244	12.8773	11.5055	12.9481
AT1G08320	TGA9	bZIP transcription factor family protein,[Source:TAIR;Acc:AT1G08320]	84	65	49	3.8465	3.4156	2.3862	215	180	118	11.119	10.0048	6.2618
AT1G08340	AT1G08340	Rho GTPase activating protein with PAK-box/P21-Rho-binding domain,[Source:TAIR;Acc:AT1G08340]	115	103	144	5.266	5.4124	7.0124	116	113	128	5.9991	6.2808	6.7924
AT1G08340	AT1G08340	Rho GTPase activating protein with PAK-box/P21-Rho-binding domain,[Source:TAIR;Acc:AT1G08340]	124	94	61	5.6781	4.9395	2.9705	104	101	38	5.3785	5.6138	2.0165
AT1G08360	AT1G08360	Ribosomal protein L1p/L10e family,[Source:TAIR;Acc:AT1G08360]	3544	4019	3327	162.284	211.188	162.015	3521	3577	3935	182.0927	198.8172	208.8142
AT1G08370	DCP1	decapping 1,[Source:TAIR;Acc:AT1G08370]	443	376	412	20.2855	19.7578	20.0632	647	480	600	33.4604	26.6794	31.8395
AT1G08380	PSAO	photosystem I subunit O,[Source:TAIR;Acc:AT1G08380]	8959	7396	8046	410.243	388.64	391.817	21615	21226	18507	1117.8457	1179.7859	982.0903
AT1G08390	AT1G08390	unknown protein,[Source:TAIR;Acc:AT1G08390]	52	32	50	2.3811	1.6815	2.4349	80	53	48	4.1373	2.9459	2.5472
AT1G08400	AT1G08400	RINT-1 / TIP-1 family,[Source:TAIR;Acc:AT1G08400]	178	135	152	8.1508	7.0939	7.402	115	120	120	5.9474	6.6699	6.3679
AT1G08410	AT1G08410	P-loop containing nucleoside triphosphate hydrolases superfamily protein,[Source:TAIR;Acc:AT1G08410]	511	527	425	23.3993	27.6924	20.6963	249	218	276	12.8773	12.1169	14.6462
AT1G08420	BSL2	BRI1 suppressor 1 (BSU1)-like 2,[Source:TAIR;Acc:AT1G08420]	1225	1012	1095	56.0942	53.1779	53.3233	1034	860	922	53.4746	47.8006	48.9267
AT1G08430	ALMT1	aluminum-activated malate transporter 1,[Source:TAIR;Acc:AT1G08430]	29	42	59	1.3279	2.207	2.8731	12	12	36	0.6206	0.667	1.9104
AT1G08450	CRT3	calreticulin 3,[Source:TAIR;Acc:AT1G08450]	256	301	307	11.7225	15.8167	14.95	422	329	420	21.8242	18.2865	22.2877
AT1G08460	HDA08	histone deacetylase 8,[Source:TAIR;Acc:AT1G08460]	302	247	328	13.8289	12.9792	15.9726	309	258	394	15.9803	14.3402	20.908
AT1G08465	YAB2	Plant-specific transcription factor YABBY family protein,[Source:TAIR;Acc:AT1G08465]	109	89	112	4.9912	4.6767	5.4541	116	118	156	5.9991	6.5587	8.2783
AT1G08470	SSL3	strictosidine synthase-like 3,[Source:TAIR;Acc:AT1G08470]	224	190	191	10.2572	9.984	9.3011	246	244	219	12.7222	13.562	11.6214
AT1G08480	AT1G08480	unknown protein,[Source:TAIR;Acc:AT1G08480]	726	871	863	33.2444	45.7687	42.0256	735	682	911	38.0114	37.907	48.343
AT1G08490	ATSUFS	chloroplastic NIFS-like cysteine desulfurase,[Source:TAIR;Acc:AT1G08490]	514	504	493	23.5367	26.4838	24.0077	891	897	974	46.0791	49.8572	51.6862
AT1G08500	ENODL18	early nodulin-like protein 18,[Source:TAIR;Acc:AT1G08500]	34	39	15	1.5569	2.0494	0.7305	51	35	19	2.6375	1.9454	1.0083
AT1G08510	FATB	fatty acyl-ACP thioesterases B,[Source:TAIR;Acc:AT1G08510]	1537	1253	1403	70.381	65.8418	68.322	2128	1875	1896	110.0521	104.2165	100.6129
AT1G08520	ALB1	ALBINA 1,[Source:TAIR;Acc:AT1G08520]	3001	2219	2177	137.419	116.602	106.014	4459	3966	4979	230.6025	220.4387	264.215
AT1G08530	AT1G08530	unknown protein,[Source:TAIR;Acc:AT1G08530]	90	88	93	4.1212	4.6242	4.5288	148	107	146	7.654	5.9473	7.7476
AT1G08540	SIGB	RNApolymerase sigma subunit 2,[Source:TAIR;Acc:AT1G08540]	1602	1419	1378	73.3575	74.5646	67.1046	2265	2354	2245	117.1372	130.8403	119.1329
AT1G08550	NPQ1	non-photochemical quenching 1,[Source:TAIR;Acc:AT1G08550]	570	427	533	26.101	22.4377	25.9555	482	499	560	24.9272	27.7355	29.7169
AT1G08560	SYP111	syntaxin of plants 111,[Source:TAIR;Acc:AT1G08560]	542	507	334	24.8188	26.6415	16.2648	177	262	126	9.1538	14.5625	6.6863
AT1G08570	ACHT4	atypical CYS HIS rich thioredoxin 4,[Source:TAIR;Acc:AT1G08570]	2339	2113	2857	107.106	111.032	139.128	860	971	729	44.4759	53.9702	38.685
AT1G08580	AT1G08580	unknown protein,[Source:TAIR;Acc:AT1G08580]	298	460	379	13.6458	24.1718	18.4562	176	193	186	9.1021	10.7273	9.8703
AT1G08590	AT1G08590	Leucine-rich receptor-like protein kinase family protein,[Source:TAIR;Acc:AT1G08590]	207	248	147	9.4788	13.0317	7.1585	234	235	196	12.1016	13.0618	10.4009
AT1G08590	AT1G08590	Leucine-rich receptor-like protein kinase family protein,[Source:TAIR;Acc:AT1G08590]	275	310	188	12.5926	16.2897	9.1551	279	262	218	14.4288	14.5625	11.5684
AT1G08600	ATRX	P-loop containing nucleoside triphosphate hydrolases superfamily protein,[Source:TAIR;Acc:AT1G08600]	682	630	699	31.2296	33.1048	34.0393	436	445	473	22.5483	24.734	25.1002
AT1G08610	AT1G08610	Pentatricopeptide repeat (PPR) superfamily protein,[Source:TAIR;Acc:AT1G08610]	409	376	376	18.7286	19.7578	18.3101	147	158	200	7.6023	8.782	10.6132
AT1G08620	PKDM7D	Transcription factor jumonji (jmj) family protein / zinc finger (C5HC2 type) family protein,[Source:TAIR;Acc:AT1G08620]	665	653	650	30.4511	34.3134	31.6531	669	550	636	34.5981	30.5702	33.7499
AT1G08630	THA1	threonine aldolase 1,[Source:TAIR;Acc:AT1G08630]	98	73	51	4.4875	3.836	2.4836	94	67	133	4.8613	3.724	7.0578
AT1G08640	CJD1	Chloroplast J-like domain 1,[Source:TAIR;Acc:AT1G08640]	465	507	498	21.2929	26.6415	24.2511	979	920	1149	50.6302	51.1355	60.9727
AT1G08650	PPCK1	phosphoenolpyruvate carboxylase kinase 1,[Source:TAIR;Acc:AT1G08650]	738	429	832	33.7939	22.5428	40.516	280	351	168	14.4805	19.5093	8.9151
AT1G08660	MGP2	MALE GAMETOPHYTE DEFECTIVE 2,[Source:TAIR;Acc:AT1G08660]	218	212	156	9.9825	11.14	7.5967	218	190	257	11.2741	10.5606	13.6379
AT1G08670	AT1G08670	ENTH/VHS family protein,[Source:TAIR;Acc:AT1G08670]	27	33	29	1.2364	1.7341	1.4122	47	32	25	2.4307	1.7786	1.3266
AT1G08680	ZIGA4	ARF GAP-like zinc finger-containing protein ZIGA4,[Source:TAIR;Acc:AT1G08680]	461	376	357	21.1097	19.7578	17.3849	571	552	735	29.53	30.6813	39.0034
AT1G08700	PS1	Presenilin-1,[Source:TAIR;Acc:AT1G08700]	648	591	608	29.6727	31.0555	29.6078	744	633	785	38.4769	35.1835	41.6567
AT1G08710	AT1G08710	F-box family protein,[Source:TAIR;Acc:AT1G08710]	123	96	104	5.6323	5.0445	5.0645	125	93	118	6.4645	5.1691	6.2618
AT1G08720	EDR1	Protein kinase superfamily protein,[Source:TAIR;Acc:AT1G08720]	270	215	273	12.3636	11.2977	13.2943	420	333	458	21.7208	18.5088	24.3042
AT1G08750	AT1G08750	Peptidase C13 family,[Source:TAIR;Acc:AT1G08750]	78	78	68	3.5717	4.0987	3.3114	153	130	151	7.9126	7.2257	8.0129
AT1G08760	AT1G08760	Plant protein of unknown function (DUF936),[Source:TAIR;Acc:AT1G08760]	374	332	380	17.1259	17.4457	18.5049	312	267	329	16.1355	14.8404	17.4587
AT1G08770	PRA1,E	prenylated RAB acceptor 1,E,[Source:TAIR;Acc:AT1G08770]	176	161	167	8.0593	8.4601	8.1324	254	254	258	13.1359	14.1179	13.691
AT1G08780	AIP3	ABI3-interacting protein 3,[Source:TAIR;Acc:AT1G08780]	223	206	183	10.2114	10.8247	8.9116	147	179	187	7.6023	9.9492	9.9233
AT1G08800	AT1G08800	Protein of unknown function, DUF593,[Source:TAIR;Acc:AT1G08800]	470	467	452	21.5219	24.5396	22.0111	416	430	389	21.5139	23.9003	20.6426
AT1G08810	MYB60	myb domain protein 60,[Source:TAIR;Acc:AT1G08810]	189	218	158	8.6545	11.4553	7.6941	184	120	179	9.5158	6.6699	9.4988
AT1G08820	VAP27-2	vamp/synaptobrevin-associated protein 27-2,[Source:TAIR;Acc:AT1G08820]	289	287	309	13.2337	15.0811	15.0474	391	343	392	20.221	19.0647	20.8018
AT1G08830	CSD1	copper/zinc superoxide dismutase 1,[Source:TAIR;Acc:AT1G08830]	332	289	294	15.2027	15.1862	14.3169	1397	918	1673	72.2475	51.0244	88.7792
AT1G08830	CSD1	copper/zinc superoxide dismutase 1,[Source:TAIR;Acc:AT1G08830]	233	213	221	10.6693	11.1926	10.7621	478	277	503	24.7203	15.3962	26.6921
AT1G08845	AT1G08845	Ribosomal L18p/L5e family protein,[Source:TAIR;Acc:AT1G08845]	92	94	74	4.2128	4.9395	3.6036	76	63	83	3.9304	3.5017	4.4045
AT1G08880	HTA5	Histone superfamily protein,[Source:TAIR;Acc:AT1G08880]	841	801	678	38.5104	42.0904	33.0166	708	702	743	36.6151	39.0186	39.4279
AT1G08900	AT1G08900	Major facilitator superfamily protein,[Source:TAIR;Acc:AT1G08900]	37	19	19	1.6943	0.9984	0.9252	144	139	172	7.4471	7.7259	9.1273
AT1G08910	EMB3001	zinc ion binding;zinc ion binding,[Source:TAIR;Acc:AT1G08910]	296	279	408	13.5542	14.6607	19.8684	314	275	393	16.2389	15.2851	20.8549
AT1G08920	ESL1	ERD (early response to dehydration) six-like 1,[Source:TAIR;Acc:AT1G08920]	43	45	39	1.969	2.3646	1.8992	186	158	123	9.6192	8.782	6.5271
AT1G08930	ERD6	Major facilitator superfamily protein,[Source:TAIR;Acc:AT1G08930]	512	480	413	23.4451	25.2227	20.1119	1124	709	1473	58.129	39.4077	78.166
AT1G08940	AT1G08940	Phosphoglycerate mutase family protein,[Source:TAIR;Acc:AT1G08940]	194	155	205	8.8835	8.1448	9.9829	93	95	128	4.8096	5.2803	6.7924
AT1G08960	CAX11	cation exchanger 11,[Source:TAIR;Acc:AT1G08960]	183	166	178	8.3798	8.7229	8.6681	192	171	221	9.9295	9.5045	11.7276
AT1G08970	HAP5C	nuclear factor Y, subunit C9,[Source:TAIR;Acc:AT1G08970]	365	387	351	16.7138	20.3358	17.0927	442	391	490	22.8586	21.7326	26.0023
AT1G08980	ATAMI1	amidase 1,[Source:TAIR;Acc:AT1G08980]	208	159	193	9.5246	8.355	9.3985	492	346	706	25.4444	19.2314	37.4645
AT1G08990	PGSIP5	plant glycogenin-like starch initiation protein 5,[Source:TAIR;Acc:AT1G08990]	135	96	80	6.1818	5.0445	3.8958	134	122	65	6.93	6.781	3.4493
AT1G09000	ANP1	NPK1-related protein kinase 1,[Source:TAIR;Acc:AT1G09000]	848	773	789	38.8309	40.6191	38.422	1316	1183	1535	68.0585	65.7536	81.4561
AT1G09000	ANP1	NPK1-related protein kinase 1,[Source:TAIR;Acc:AT1G09000]	33	36	51	1.5111	1.8917	2.4836	34	41	32	1.7584	2.2789	1.6981
AT1G09020	SNF4	homolog of yeast sucrose nonfermenting 4,[Source:TAIR;Acc:AT1G09020]	591	539	524	27.0626	28.323	25.5173	771	706	794	39.8732	39.241	42.1343
AT1G09040	AT1G09040	unknown protein,[Source:TAIR;Acc:AT1G09040]	97	127	142	4.4417	6.6735	6.915	77	57	117	3.9821	3.1682	6.2087
AT1G09050	AT1G09050	unknown protein,[Source:TAIR;Acc:AT1G09050]	76	92	98	3.4801	4.8344	4.7723	64	53	104	3.3098	2.9459	5.5189
AT1G09060	AT1G09060	Zinc finger, RING-type;Transcription factor jumonji/aspartyl beta-hydroxylase,[Source:TAIR;Acc:AT1G09060]	484	495	540	22.1629	26.0109	26.2964	767	625	817	39.6663	34.7388	43.3548
AT1G09070	SRC2	soybean gene regulated by cold-2,[Source:TAIR;Acc:AT1G09070]	1920	1648	2115	87.9191	86.598	102.994	2933	1962	3632	151.6836	109.0521	192.7353
AT1G09080	BIP3	Heat shock protein 70 (Hsp 70) family protein,[Source:TAIR;Acc:AT1G09080]	30	30	107	1.3737	1.5764	5.2106	12	4	35	0.6206	0.2223	1.8573
AT1G09090	ATRBOHB	respiratory burst oxidase homolog B,[Source:TAIR;Acc:AT1G09090]	289	275	339	13.2337	14.4505	16.5083	213	227	315	11.0156	12.6171	16.7158
AT1G09090	ATRBOHB	respiratory burst oxidase homolog B,[Source:TAIR;Acc:AT1G09090]	118	93	89	5.4034	4.8869	4.334	162	180	74	8.378	10.0048	3.9269
AT1G09130	AT1G09130	ATP-dependent caseinolytic (Clp) protease/crotonase family protein,[Source:TAIR;Acc:AT1G09130]	1287	925	1035	58.9333	48.6063	50.4015	2101	1783	2310	108.6557	99.1029	122.5822
AT1G09140	ATSRP30	SERINE-ARGININE PROTEIN 30,[Source:TAIR;Acc:AT1G09140]	340	337	366	15.569	17.7084	17.8231	859	807	1176	44.4242	44.8548	62.4055
AT1G09150	AT1G09150	pseudouridine synthase and archaeosine transglycosylase (PUA) domain-containing protein,[Source:TAIR;Acc:AT1G09150]	130	139	110	5.9529	7.3041	5.3567	250	243	292	12.9291	13.5065	15.4952
AT1G09155	AtPP2-B15	phloem protein 2-B15,[Source:TAIR;Acc:AT1G09155]	23	17	14	1.0532	0.8933	0.6818	23	20	12	1.1895	1.1116	0.6368
AT1G09160	AT1G09160	Protein phosphatase 2C family protein,[Source:TAIR;Acc:AT1G09160]	257	256	228	11.7683	13.4521	11.1029	487	447	443	25.1858	24.8452	23.5082
AT1G09170	AT1G09170	P-loop nucleoside triphosphate hydrolases superfamily protein with CH (Calponin Homology) domain,[Source:TAIR;Acc:AT1G09170]	19	25	29	0.87	1.3137	1.4122	35	25	24	1.8101	1.3896	1.2736
AT1G09190	AT1G09190	Tetratricopeptide repeat (TPR)-like superfamily protein,[Source:TAIR;Acc:AT1G09190]	103	75	114	4.7165	3.9411	5.5515	16	22	25	0.8275	1.2228	1.3266
AT1G09195	AT1G09195	No description	70	44	61	3.2054	2.3121	2.9705	74	68	70	3.827	3.7796	3.7146
AT1G09200	AT1G09200	Histone superfamily protein,[Source:TAIR;Acc:AT1G09200]	1131	939	761	51.7898	49.3419	37.0585	1027	868	762	53.1125	48.2453	40.4362
AT1G09210	CRT1b	calreticulin 1b,[Source:TAIR;Acc:AT1G09210]	1317	1369	1186	60.307	71.9373	57.7547	1582	1226	2066	81.815	68.1437	109.6341
AT1G09230	AT1G09230	RNA-binding (RRM/RBD/RNP motifs) family protein,[Source:TAIR;Acc:AT1G09230]	143	122	91	6.5481	6.4108	4.4314	151	156	199	7.8091	8.6708	10.5601
AT1G09250	AT1G09250	basic helix-loop-helix (bHLH) DNA-binding superfamily protein,[Source:TAIR;Acc:AT1G09250]	536	390	295	24.5441	20.4935	14.3656	427	382	348	22.0828	21.2324	18.4669
AT1G09270	IMPA-4	importin alpha isoform 4,[Source:TAIR;Acc:AT1G09270]	285	239	245	13.0505	12.5588	11.9308	310	269	340	16.032	14.9516	18.0424
AT1G09270	IMPA-4	importin alpha isoform 4,[Source:TAIR;Acc:AT1G09270]	1220	981	984	55.8652	51.5489	47.9179	967	779	921	50.0096	43.2985	48.8737
AT1G09290	AT1G09290	unknown protein,[Source:TAIR;Acc:AT1G09290]	172	177	166	7.8761	9.3009	8.0837	126	108	144	6.5162	6.0029	7.6415
AT1G09290	AT1G09290	unknown protein,[Source:TAIR;Acc:AT1G09290]	134	152	163	6.136	7.9872	7.9376	137	121	128	7.0851	6.7254	6.7924
AT1G09310	AT1G09310	Protein of unknown function, DUF538,[Source:TAIR;Acc:AT1G09310]	8268	8896	15167	378.602	467.461	738.589	13386	14166	19786	692.2731	787.3762	1049.9615
AT1G09320	AT1G09320	agenet domain-containing protein,[Source:TAIR;Acc:AT1G09320]	148	110	115	6.7771	5.7802	5.6002	61	50	58	3.1547	2.7791	3.0778
AT1G09330	AT1G09330	unknown protein,[Source:TAIR;Acc:AT1G09330]	254	267	290	11.631	14.0301	14.1222	381	318	364	19.7039	17.6751	19.316
AT1G09340	CRB	chloroplast RNA binding,[Source:TAIR;Acc:AT1G09340]	6580	5777	5573	301.306	303.566	271.389	15200	15819	11725	786.0863	879.2534	622.1975
AT1G09390	AT1G09390	GDSL-like Lipase/Acylhydrolase superfamily protein,[Source:TAIR;Acc:AT1G09390]	9	6	21	0.4121	0.3153	1.0226	17	9	22	0.8792	0.5002	1.1674
AT1G09390	AT1G09390	GDSL-like Lipase/Acylhydrolase superfamily protein,[Source:TAIR;Acc:AT1G09390]	155	122	187	7.0976	6.4108	9.1064	294	246	346	15.2046	13.6732	18.3608
AT1G09410	AT1G09410	pentatricopeptide (PPR) repeat-containing protein,[Source:TAIR;Acc:AT1G09410]	31	33	42	1.4195	1.7341	2.0453	14	17	22	0.724	0.9449	1.1674
AT1G09415	NIMIN-3	NIM1-interacting 3,[Source:TAIR;Acc:AT1G09415]	194	173	207	8.8835	9.0907	10.0803	189	170	235	9.7744	9.449	12.4705
AT1G09420	G6PD4	glucose-6-phosphate dehydrogenase 4,[Source:TAIR;Acc:AT1G09420]	177	160	167	8.105	8.4076	8.1324	228	177	485	11.7913	9.838	25.737
AT1G09420	G6PD4	glucose-6-phosphate dehydrogenase 4,[Source:TAIR;Acc:AT1G09420]	82	75	76	3.7549	3.9411	3.701	88	74	173	4.551	4.1131	9.1804
AT1G09430	ACLA-3	ATP-citrate lyase A-3,[Source:TAIR;Acc:AT1G09430]	649	547	614	29.7185	28.7434	29.9	876	840	1023	45.3034	46.689	54.2864
AT1G09440	AT1G09440	Protein kinase superfamily protein,[Source:TAIR;Acc:AT1G09440]	87	98	91	3.9838	5.1496	4.4314	202	226	171	10.4467	12.5616	9.0743
AT1G09450	AT1G09450	Protein kinase superfamily protein,[Source:TAIR;Acc:AT1G09450]	31	29	22	1.4195	1.5239	1.0713	12	22	10	0.6206	1.2228	0.5307
AT1G09460	AT1G09460	Carbohydrate-binding X8 domain superfamily protein,[Source:TAIR;Acc:AT1G09460]	97	117	62	4.4417	6.148	3.0192	38	45	36	1.9652	2.5012	1.9104
AT1G09460	AT1G09460	Carbohydrate-binding X8 domain superfamily protein,[Source:TAIR;Acc:AT1G09460]	144	146	148	6.5939	7.6719	7.2072	244	150	171	12.6188	8.3373	9.0743
AT1G09480	AT1G09480	NAD(P)-binding Rossmann-fold superfamily protein,[Source:TAIR;Acc:AT1G09480]	27	22	22	1.2364	1.156	1.0713	34	27	37	1.7584	1.5007	1.9634
AT1G09490	AT1G09490	NAD(P)-binding Rossmann-fold superfamily protein,[Source:TAIR;Acc:AT1G09490]	288	235	261	13.1879	12.3486	12.7099	435	407	574	22.4965	22.6219	30.4598
AT1G09500	AT1G09500	NAD(P)-binding Rossmann-fold superfamily protein,[Source:TAIR;Acc:AT1G09500]	100	73	93	4.5791	3.836	4.5288	71	93	114	3.6719	5.1691	6.0495
AT1G09520	AT1G09520	No description	391	312	361	17.9044	16.3948	17.5796	213	212	242	11.0156	11.7834	12.8419
AT1G09530	PIF3	phytochrome interacting factor 3,[Source:TAIR;Acc:AT1G09530]	232	291	365	10.6236	15.2913	17.7744	230	192	365	11.8947	10.6718	19.369
AT1G09540	MYB61	myb domain protein 61,[Source:TAIR;Acc:AT1G09540]	25	29	12	1.1448	1.5239	0.5844	35	34	12	1.8101	1.8898	0.6368
AT1G09560	GLP5	germin-like protein 5,[Source:TAIR;Acc:AT1G09560]	3014	2832	2555	138.015	148.814	124.421	4387	6162	2160	226.879	342.497	114.6223
AT1G09570	PHYA	phytochrome A,[Source:TAIR;Acc:AT1G09570]	2814	2697	2792	128.856	141.72	135.962	3714	3253	3832	192.074	180.8086	203.3485
AT1G09575	AT1G09575	Protein of unknown function (DUF607),[Source:TAIR;Acc:AT1G09575]	37	50	45	1.6943	2.6274	2.1914	116	136	86	5.9991	7.5592	4.5637
AT1G09580	AT1G09580	emp24/gp25L/p24 family/GOLD family protein,[Source:TAIR;Acc:AT1G09580]	135	103	121	6.1818	5.4124	5.8924	93	99	135	4.8096	5.5026	7.1639
AT1G09590	AT1G09590	Translation protein SH3-like family protein,[Source:TAIR;Acc:AT1G09590]	4336	4228	3859	198.551	222.17	187.922	2150	2228	2445	111.1898	123.8369	129.7461
AT1G09610	AT1G09610	Protein of unknown function (DUF579),[Source:TAIR;Acc:AT1G09610]	4352	4358	4245	199.283	229.001	206.719	3269	3093	3440	169.0603	171.9155	182.5466
AT1G09610	AT1G09610	Protein of unknown function (DUF579),[Source:TAIR;Acc:AT1G09610]	52	55	52	2.3811	2.8901	2.5323	32	32	29	1.6549	1.7786	1.5389
AT1G09630	ATRAB11C	RAB GTPase 11C,[Source:TAIR;Acc:AT1G09630]	209	177	178	9.5704	9.3009	8.6681	173	163	220	8.9469	9.0599	11.6745
AT1G09640	AT1G09640	Translation elongation factor EF1B, gamma chain,[Source:TAIR;Acc:AT1G09640]	3885	4575	3933	177.899	240.404	191.526	3644	3204	4375	188.4538	178.0851	232.1632
AT1G09645	AT1G09645	unknown protein,[Source:TAIR;Acc:AT1G09645]	147	172	130	6.7313	9.0381	6.3306	195	174	243	10.0847	9.6713	12.895
AT1G09660	AT1G09660	RNA-binding KH domain-containing protein,[Source:TAIR;Acc:AT1G09660]	422	313	277	19.3239	16.4473	13.4891	389	320	406	20.1176	17.7863	21.5447
AT1G09680	AT1G09680	Pentatricopeptide repeat (PPR) superfamily protein,[Source:TAIR;Acc:AT1G09680]	31	29	26	1.4195	1.5239	1.2661	22	8	10	1.1378	0.4447	0.5307
AT1G09690	AT1G09690	Translation protein SH3-like family protein,[Source:TAIR;Acc:AT1G09690]	6744	6969	6016	308.816	366.202	292.962	3520	3530	3712	182.041	196.2049	196.9806
AT1G09700	HYL1	dsRNA-binding domain-like superfamily protein,[Source:TAIR;Acc:AT1G09700]	359	281	315	16.439	14.7658	15.3396	230	204	238	11.8947	11.3388	12.6297
AT1G09710	AT1G09710	Homeodomain-like superfamily protein,[Source:TAIR;Acc:AT1G09710]	121	117	101	5.5407	6.148	4.9184	146	127	189	7.5506	7.0589	10.0295
AT1G09730	AT1G09730	Cysteine proteinases superfamily protein,[Source:TAIR;Acc:AT1G09730]	384	338	381	17.5838	17.761	18.5536	406	409	424	20.9968	22.7331	22.4999
AT1G09740	AT1G09740	Adenine nucleotide alpha hydrolases-like superfamily protein,[Source:TAIR;Acc:AT1G09740]	366	270	256	16.7596	14.1878	12.4665	638	637	529	32.9949	35.4058	28.0719
AT1G09750	AT1G09750	Eukaryotic aspartyl protease family protein,[Source:TAIR;Acc:AT1G09750]	250	277	293	11.4478	14.5556	14.2682	383	393	484	19.8073	21.8438	25.6839
AT1G09750	AT1G09750	Eukaryotic aspartyl protease family protein,[Source:TAIR;Acc:AT1G09750]	1788	1009	889	81.8746	53.0202	43.2917	2012	2009	1769	104.053	111.6645	93.8735
AT1G09770	ATCDC5	cell division cycle 5,[Source:TAIR;Acc:AT1G09770]	2635	2494	2177	120.66	131.053	106.014	1888	1508	2140	97.6402	83.8178	113.561
AT1G09780	AT1G09780	Phosphoglycerate mutase, sphosphoglycerate-independent,[Source:TAIR;Acc:AT1G09780]	2543	2756	2629	116.447	144.82	128.025	1812	1845	2157	93.7098	102.549	114.4631
AT1G09794	AT1G09794	Cox19 family protein (CHCH motif),[Source:TAIR;Acc:AT1G09794]	37	25	24	1.6943	1.3137	1.1687	19	21	29	0.9826	1.1672	1.5389
AT1G09795	ATATP-PRT2	ATP phosphoribosyl transferase 2,[Source:TAIR;Acc:AT1G09795]	51	60	50	2.3354	3.1528	2.4349	40	39	55	2.0686	2.1677	2.9186
AT1G09795	ATATP-PRT2	ATP phosphoribosyl transferase 2,[Source:TAIR;Acc:AT1G09795]	579	396	524	26.5131	20.8087	25.5173	706	601	798	36.5116	33.4048	42.3466
AT1G09810	ECT11	evolutionarily conserved C-terminal region 11,[Source:TAIR;Acc:AT1G09810]	168	194	190	7.6929	10.1942	9.2524	147	115	170	7.6023	6.3919	9.0212
AT1G09812	AT1G09812	unknown protein,[Source:TAIR;Acc:AT1G09812]	25	22	36	1.1448	1.156	1.7531	19	10	13	0.9826	0.5558	0.6899
AT1G09815	POLD4	polymerase delta 4,[Source:TAIR;Acc:AT1G09815]	335	313	535	15.34	16.4473	26.0529	221	170	353	11.4293	9.449	18.7323
AT1G09820	AT1G09820	Pentatricopeptide repeat (PPR-like) superfamily protein,[Source:TAIR;Acc:AT1G09820]	155	161	154	7.0976	8.4601	7.4994	121	99	109	6.2577	5.5026	5.7842
AT1G09830	AT1G09830	Glycinamide ribonucleotide (GAR) synthetase,[Source:TAIR;Acc:AT1G09830]	783	704	792	35.8545	36.9933	38.5681	697	651	872	36.0462	36.184	46.2734
AT1G09840	ATSK41	shaggy-like protein kinase 41,[Source:TAIR;Acc:AT1G09840]	252	228	237	11.5394	11.9808	11.5412	389	359	373	20.1176	19.954	19.7936
AT1G09850	XBCP3	xylem bark cysteine peptidase 3,[Source:TAIR;Acc:AT1G09850]	13	9	22	0.5953	0.4729	1.0713	7	14	25	0.362	0.7781	1.3266
AT1G09850	XBCP3	xylem bark cysteine peptidase 3,[Source:TAIR;Acc:AT1G09850]	283	276	376	12.9589	14.5031	18.3101	346	300	457	17.8938	16.6746	24.2511
AT1G09870	AT1G09870	histidine acid phosphatase family protein,[Source:TAIR;Acc:AT1G09870]	325	301	325	14.8821	15.8167	15.8265	230	211	325	11.8947	11.7278	17.2464
AT1G09890	AT1G09890	Rhamnogalacturonate lyase family protein,[Source:TAIR;Acc:AT1G09890]	27	30	16	1.2364	1.5764	0.7792	45	49	29	2.3272	2.7235	1.5389
AT1G09900	AT1G09900	Pentatricopeptide repeat (PPR-like) superfamily protein,[Source:TAIR;Acc:AT1G09900]	723	687	556	33.107	36.1	27.0756	381	369	381	19.7039	20.5098	20.2181
AT1G09910	AT1G09910	Rhamnogalacturonate lyase family protein,[Source:TAIR;Acc:AT1G09910]	130	119	143	5.9529	6.2531	6.9637	167	135	191	8.6366	7.5036	10.1356
AT1G09920	AT1G09920	TRAF-type zinc finger-related,[Source:TAIR;Acc:AT1G09920]	237	239	224	10.8525	12.5588	10.9081	287	263	321	14.8426	14.6181	17.0341
AT1G09932	AT1G09932	Phosphoglycerate mutase family protein,[Source:TAIR;Acc:AT1G09932]	49	64	51	2.2438	3.363	2.4836	27	15	29	1.3963	0.8337	1.5389
AT1G09940	HEMA2	Glutamyl-tRNA reductase family protein,[Source:TAIR;Acc:AT1G09940]	292	263	265	13.371	13.8199	12.9047	533	434	629	27.5647	24.1226	33.3784
AT1G09960	SUT4	sucrose transporter 4,[Source:TAIR;Acc:AT1G09960]	135	135	127	6.1818	7.0939	6.1845	105	80	62	5.4302	4.4466	3.2901
AT1G09970	LRR XI-23	Leucine-rich receptor-like protein kinase family protein,[Source:TAIR;Acc:AT1G09970]	2971	2934	3176	136.046	154.174	154.662	2666	2344	2584	137.8754	130.2845	137.1222
AT1G09980	AT1G09980	Putative serine esterase family protein,[Source:TAIR;Acc:AT1G09980]	279	306	305	12.7757	16.0795	14.8526	425	377	479	21.9794	20.9545	25.4186
AT1G09995	AT1G09995	DNA repair DEAD helicase RAD3/XP-D subfamily protein,[Source:TAIR;Acc:AT1G09995]	44	49	62	2.0148	2.5748	3.0192	62	26	49	3.2064	1.4451	2.6002
AT1G10020	AT1G10020	Protein of unknown function (DUF1005),[Source:TAIR;Acc:AT1G10020]	332	256	217	15.2027	13.4521	10.5673	872	763	701	45.0965	42.4092	37.1992
AT1G10030	ERG28	homolog of yeast ergosterol28,[Source:TAIR;Acc:AT1G10030]	171	152	118	7.8303	7.9872	5.7463	162	140	162	8.378	7.7815	8.5967
AT1G10040	AT1G10040	alpha/beta-Hydrolases superfamily protein,[Source:TAIR;Acc:AT1G10040]	22	17	41	1.0074	0.8933	1.9966	18	18	20	0.9309	1.0005	1.0613
AT1G10050	AT1G10050	glycosyl hydrolase family 10 protein / carbohydrate-binding domain-containing protein,[Source:TAIR;Acc:AT1G10050]	210	209	364	9.6162	10.9824	17.7257	264	184	284	13.6531	10.2271	15.0707
AT1G10060	ATBCAT-1	branched-chain amino acid transaminase 1,[Source:TAIR;Acc:AT1G10060]	71	70	56	3.2512	3.6783	2.727	78	54	77	4.0339	3.0014	4.0861
AT1G10070	ATBCAT-2	branched-chain amino acid transaminase 2,[Source:TAIR;Acc:AT1G10070]	139	54	83	6.365	2.8376	4.0419	273	107	381	14.1185	5.9473	20.2181
AT1G10070	ATBCAT-2	branched-chain amino acid transaminase 2,[Source:TAIR;Acc:AT1G10070]	184	169	191	8.4256	8.8805	9.3011	276	235	273	14.2737	13.0618	14.487
AT1G10095	AT1G10095	Protein prenylyltransferase superfamily protein,[Source:TAIR;Acc:AT1G10095]	26	16	22	1.1906	0.8408	1.0713	37	36	46	1.9135	2.001	2.441
AT1G10110	AT1G10110	F-box family protein,[Source:TAIR;Acc:AT1G10110]	176	133	115	8.0593	6.9888	5.6002	241	209	222	12.4636	11.6167	11.7806
AT1G10130	ECA3	endoplasmic reticulum-type calcium-transporting ATPase 3,[Source:TAIR;Acc:AT1G10130]	246	215	219	11.2646	11.2977	10.6647	373	382	406	19.2901	21.2324	21.5447
AT1G10140	AT1G10140	Uncharacterised conserved protein UCP031279,[Source:TAIR;Acc:AT1G10140]	217	137	220	9.9367	7.199	10.7134	269	218	281	13.9117	12.1169	14.9115
AT1G10150	AT1G10150	Carbohydrate-binding protein,[Source:TAIR;Acc:AT1G10150]	311	413	472	14.2411	21.702	22.985	575	496	581	29.7368	27.5687	30.8313
AT1G10160	AT1G10160	transposable element gene,[Source:TAIR;Acc:AT1G10160]	187	151	127	8.563	7.9346	6.1845	137	132	120	7.0851	7.3368	6.3679
AT1G10170	ATNFXL1	NF-X-like 1,[Source:TAIR;Acc:AT1G10170]	1364	1115	1602	62.4592	58.5903	78.0127	1611	1083	2640	83.3148	60.1954	140.0939
AT1G10180	AT1G10180	No description	377	354	369	17.2633	18.6017	17.9692	383	331	380	19.8073	18.3977	20.165
AT1G10200	WLIM1	GATA type zinc finger transcription factor family protein,[Source:TAIR;Acc:AT1G10200]	307	317	386	14.0579	16.6575	18.7971	496	450	672	25.6512	25.012	35.6603
AT1G10210	ATMPK1	mitogen-activated protein kinase 1,[Source:TAIR;Acc:AT1G10210]	49	28	47	2.2438	1.4713	2.2888	99	88	99	5.1199	4.8912	5.2535
AT1G10230	ASK18	SKP1-like 18,[Source:TAIR;Acc:AT1G10230]	304	263	271	13.9205	13.8199	13.1969	136	123	166	7.0334	6.8366	8.8089
AT1G10240	FRS11	FAR1-related sequence 11,[Source:TAIR;Acc:AT1G10240]	199	204	181	9.1125	10.7197	8.8142	176	152	208	9.1021	8.4485	11.0377
AT1G10270	GRP23	glutamine-rich protein 23,[Source:TAIR;Acc:AT1G10270]	858	738	730	39.2888	38.7799	35.5489	277	268	318	14.3254	14.896	16.875
AT1G10280	AT1G10280	Core-2/I-branching beta-1,6-N-acetylglucosaminyltransferase family protein,[Source:TAIR;Acc:AT1G10280]	99	130	130	4.5333	6.8312	6.3306	108	106	89	5.5853	5.8917	4.7229
AT1G10290	ADL6	dynamin-like protein 6,[Source:TAIR;Acc:AT1G10290]	715	708	699	32.7407	37.2035	34.0393	1124	879	1205	58.129	48.8567	63.9444
AT1G10300	AT1G10300	Nucleolar GTP-binding protein,[Source:TAIR;Acc:AT1G10300]	21	41	37	0.9616	2.1544	1.8018	7	6	29	0.362	0.3335	1.5389
AT1G10310	AT1G10310	NAD(P)-binding Rossmann-fold superfamily protein,[Source:TAIR;Acc:AT1G10310]	187	213	197	8.563	11.1926	9.5933	206	218	271	10.6535	12.1169	14.3809
AT1G10320	AT1G10320	Zinc finger C-x8-C-x5-C-x3-H type family protein,[Source:TAIR;Acc:AT1G10320]	366	316	317	16.7596	16.605	15.437	141	155	186	7.292	8.6152	9.8703
AT1G10330	AT1G10330	Tetratricopeptide repeat (TPR)-like superfamily protein,[Source:TAIR;Acc:AT1G10330]	36	23	24	1.6485	1.2086	1.1687	30	12	21	1.5515	0.667	1.1144
AT1G10340	AT1G10340	Ankyrin repeat family protein,[Source:TAIR;Acc:AT1G10340]	25	8	44	1.1448	0.4204	2.1427	56	17	22	2.8961	0.9449	1.1674
AT1G10350	AT1G10350	DNAJ heat shock family protein,[Source:TAIR;Acc:AT1G10350]	206	178	200	9.433	9.3534	9.7394	159	150	166	8.2229	8.3373	8.8089
AT1G10360	ATGSTU18	glutathione S-transferase TAU 18,[Source:TAIR;Acc:AT1G10360]	326	262	270	14.9279	13.7674	13.1482	514	390	354	26.5821	21.677	18.7853
AT1G10370	GST30	Glutathione S-transferase family protein,[Source:TAIR;Acc:AT1G10370]	2064	2028	2464	94.513	106.566	119.99	2927	4137	2246	151.3733	229.9432	119.186
AT1G10380	AT1G10380	Putative membrane lipoprotein,[Source:TAIR;Acc:AT1G10380]	162	172	149	7.4182	9.0381	7.2559	326	319	190	16.8595	17.7307	10.0825
AT1G10390	AT1G10390	Nucleoporin autopeptidase,[Source:TAIR;Acc:AT1G10390]	1807	1547	1535	82.7447	81.2907	74.75	1313	1216	1504	67.9034	67.5878	79.8111
AT1G10410	AT1G10410	Protein of unknown function (DUF1336),[Source:TAIR;Acc:AT1G10410]	403	400	423	18.4538	21.0189	20.5989	290	257	318	14.9977	14.2846	16.875
AT1G10430	PP2A-2	protein phosphatase 2A-2,[Source:TAIR;Acc:AT1G10430]	284	256	285	13.0047	13.4521	13.8787	339	323	334	17.5318	17.953	17.724
AT1G10450	SNL6	SIN3-like 6,[Source:TAIR;Acc:AT1G10450]	405	416	380	18.5454	21.8597	18.5049	391	345	514	20.221	19.1758	27.2759
AT1G10470	ARR4	response regulator 4,[Source:TAIR;Acc:AT1G10470]	727	651	544	33.2902	34.2083	26.4912	1243	959	892	64.2832	53.3032	47.3348
AT1G10480	ZFP5	zinc finger protein 5,[Source:TAIR;Acc:AT1G10480]	12	22	17	0.5495	1.156	0.8279	68	71	55	3.5167	3.9463	2.9186
AT1G10490	AT1G10490	Domain of unknown function (DUF1726) ;Putative ATPase (DUF699),[Source:TAIR;Acc:AT1G10490]	466	495	430	21.3387	26.0109	20.9397	451	492	486	23.324	27.3464	25.79
AT1G10490	AT1G10490	Domain of unknown function (DUF1726) ;Putative ATPase (DUF699),[Source:TAIR;Acc:AT1G10490]	644	663	611	29.4895	34.8389	29.7539	885	839	805	45.7688	46.6334	42.718
AT1G10510	emb2004	RNI-like superfamily protein,[Source:TAIR;Acc:AT1G10510]	445	367	384	20.3771	19.2849	18.6997	718	716	843	37.1322	39.7968	44.7345
AT1G10520	AT1G10520	DNA polymerase lambda (POLL),[Source:TAIR;Acc:AT1G10520]	25	29	28	1.1448	1.5239	1.3635	20	7	24	1.0343	0.3891	1.2736
AT1G10522	AT1G10522	unknown protein,[Source:TAIR;Acc:AT1G10522]	334	288	209	15.2943	15.1336	10.1777	279	293	480	14.4288	16.2856	25.4716
AT1G10522	AT1G10522	unknown protein,[Source:TAIR;Acc:AT1G10522]	32	27	18	1.4653	1.4188	0.8765	15	25	14	0.7757	1.3896	0.7429
AT1G10550	XTH33	xyloglucan:xyloglucosyl transferase 33,[Source:TAIR;Acc:AT1G10550]	33	32	23	1.5111	1.6815	1.12	33	103	57	1.7066	5.725	3.0248
AT1G10560	PUB18	plant U-box 18,[Source:TAIR;Acc:AT1G10560]	26	28	21	1.1906	1.4713	1.0226	6	25	4	0.3103	1.3896	0.2123
AT1G10570	OTS2	Cysteine proteinases superfamily protein,[Source:TAIR;Acc:AT1G10570]	155	177	205	7.0976	9.3009	9.9829	172	157	215	8.8952	8.7264	11.4092
AT1G10580	AT1G10580	Transducin/WD40 repeat-like superfamily protein,[Source:TAIR;Acc:AT1G10580]	1055	979	1088	48.3097	51.4438	52.9824	481	434	586	24.8755	24.1226	31.0966
AT1G10585	AT1G10585	basic helix-loop-helix (bHLH) DNA-binding superfamily protein,[Source:TAIR;Acc:AT1G10585]	352	366	172	16.1185	19.2323	8.3759	19	21	18	0.9826	1.1672	0.9552
AT1G10590	AT1G10590	Nucleic acid-binding, OB-fold-like protein,[Source:TAIR;Acc:AT1G10590]	1247	1227	1225	57.1016	64.4756	59.6539	966	788	1098	49.9579	43.7987	58.2663
AT1G10600	AMSH2	associated molecule with the SH3 domain of STAM 2,[Source:TAIR;Acc:AT1G10600]	156	132	139	7.1434	6.9363	6.7689	211	225	304	10.9121	12.506	16.132
AT1G10610	AT1G10610	basic helix-loop-helix (bHLH) DNA-binding superfamily protein,[Source:TAIR;Acc:AT1G10610]	87	58	74	3.9838	3.0477	3.6036	84	66	105	4.3442	3.6684	5.5719
AT1G10630	ATARFA1F	ADP-ribosylation factor A1F,[Source:TAIR;Acc:AT1G10630]	323	307	302	14.7906	16.132	14.7065	609	527	603	31.4952	29.2918	31.9987
AT1G10640	AT1G10640	Pectin lyase-like superfamily protein,[Source:TAIR;Acc:AT1G10640]	189	157	159	8.6545	8.2499	7.7428	322	163	144	16.6526	9.0599	7.6415
AT1G10650	AT1G10650	SBP (S-ribonuclease binding protein) family protein,[Source:TAIR;Acc:AT1G10650]	723	601	670	33.107	31.5809	32.627	354	344	274	18.3075	19.1202	14.5401
AT1G10657	AT1G10657	Plant protein 1589 of unknown function,[Source:TAIR;Acc:AT1G10657]	27	32	38	1.2364	1.6815	1.8505	34	29	20	1.7584	1.6119	1.0613
AT1G10660	AT1G10660	unknown protein,[Source:TAIR;Acc:AT1G10660]	392	338	423	17.9501	17.761	20.5989	663	538	781	34.2878	29.9032	41.4445
AT1G10670	ACLA-1	ATP-citrate lyase A-1,[Source:TAIR;Acc:AT1G10670]	1516	1390	1417	69.4194	73.0408	69.0038	2430	2255	2273	125.6704	125.3377	120.6187
AT1G10682	AT1G10682	other RNA,[Source:TAIR;Acc:AT1G10682]	753	735	473	34.4808	38.6223	23.0337	737	661	348	38.1148	36.7398	18.4669
AT1G10690	AT1G10690	unknown protein,[Source:TAIR;Acc:AT1G10690]	16	23	18	0.7327	1.2086	0.8765	32	20	21	1.6549	1.1116	1.1144
AT1G10700	PRS3	phosphoribosyl pyrophosphate (PRPP) synthase 3,[Source:TAIR;Acc:AT1G10700]	253	287	214	11.5852	15.0811	10.4212	292	266	334	15.1011	14.7848	17.724
AT1G10720	AT1G10720	BSD domain-containing protein,[Source:TAIR;Acc:AT1G10720]	275	260	277	12.5926	13.6623	13.4891	340	300	346	17.5835	16.6746	18.3608
AT1G10730	AT1G10730	Clathrin adaptor complexes medium subunit family protein,[Source:TAIR;Acc:AT1G10730]	54	46	65	2.4727	2.4172	3.1653	60	69	94	3.103	3.8352	4.9882
AT1G10740	AT1G10740	alpha/beta-Hydrolases superfamily protein,[Source:TAIR;Acc:AT1G10740]	682	623	736	31.2296	32.737	35.841	1191	899	1023	61.594	49.9683	54.2864
AT1G10747	AT1G10747	Maternally expressed gene (MEG) family protein,[Source:TAIR;Acc:AT1G10747]	50	49	36	2.2896	2.5748	1.7531	19	42	24	0.9826	2.3344	1.2736
AT1G10760	SEX1	Pyruvate phosphate dikinase, PEP/pyruvate binding domain,[Source:TAIR;Acc:AT1G10760]	689	672	921	31.5501	35.3118	44.85	1027	1017	995	53.1125	56.527	52.8006
AT1G10780	AT1G10780	F-box/RNI-like superfamily protein,[Source:TAIR;Acc:AT1G10780]	107	79	81	4.8997	4.1512	3.9445	61	70	58	3.1547	3.8907	3.0778
AT1G10810	AT1G10810	NAD(P)-linked oxidoreductase superfamily protein,[Source:TAIR;Acc:AT1G10810]	14	13	24	0.6411	0.6831	1.1687	20	24	16	1.0343	1.334	0.8491
AT1G10820	AT1G10820	Protein of unknown function (DUF3755),[Source:TAIR;Acc:AT1G10820]	141	138	125	6.4566	7.2515	6.0871	158	189	201	8.1712	10.505	10.6662
AT1G10830	Z-ISO	15-cis-zeta-carotene isomerase,[Source:TAIR;Acc:AT1G10830]	368	380	400	16.8512	19.968	19.4788	579	584	664	29.9437	32.46	35.2357
AT1G10840	TIF3H1	translation initiation factor 3 subunit H1,[Source:TAIR;Acc:AT1G10840]	598	628	558	27.3831	32.9997	27.173	1210	988	1275	62.5766	54.9151	67.659
AT1G10850	AT1G10850	Leucine-rich repeat protein kinase family protein,[Source:TAIR;Acc:AT1G10850]	157	159	132	7.1892	8.355	6.428	218	161	246	11.2741	8.9487	13.0542
AT1G10850	AT1G10850	Leucine-rich repeat protein kinase family protein,[Source:TAIR;Acc:AT1G10850]	887	680	699	40.6168	35.7322	34.0393	561	427	415	29.0128	23.7336	22.0223
AT1G10870	AGD4	ARF-GAP domain 4,[Source:TAIR;Acc:AT1G10870]	202	239	223	9.2498	12.5588	10.8594	286	272	330	14.7908	15.1183	17.5117
AT1G10890	AT1G10890	unknown protein,[Source:TAIR;Acc:AT1G10890]	763	698	654	34.9387	36.678	31.8479	499	463	739	25.8064	25.7345	39.2157
AT1G10900	AT1G10900	Phosphatidylinositol-4-phosphate 5-kinase family protein,[Source:TAIR;Acc:AT1G10900]	980	931	956	44.8754	48.9216	46.5544	1016	1196	798	52.5437	66.4762	42.3466
AT1G10910	AT1G10910	Pentatricopeptide repeat (PPR) superfamily protein,[Source:TAIR;Acc:AT1G10910]	367	350	303	16.8054	18.3916	14.7552	596	627	664	30.8229	34.85	35.2357
AT1G10920	LOV1	NB-ARC domain-containing disease resistance protein,[Source:TAIR;Acc:AT1G10920]	76	73	91	3.4801	3.836	4.4314	57	74	59	2.9478	4.1131	3.1309
AT1G10930	ATSGS1	DNA helicase (RECQl4A),[Source:TAIR;Acc:AT1G10930]	178	191	149	8.1508	10.0365	7.2559	258	253	324	13.3428	14.0623	17.1933
AT1G10940	ASK1	Protein kinase superfamily protein,[Source:TAIR;Acc:AT1G10940]	733	668	723	33.5649	35.1016	35.208	653	614	855	33.7707	34.1274	45.3713
AT1G10950	TMN1	transmembrane nine 1,[Source:TAIR;Acc:AT1G10950]	1540	1384	1496	70.5184	72.7255	72.8508	1905	1628	2083	98.5194	90.4877	110.5362
AT1G10960	ATFD1	ferredoxin 1,[Source:TAIR;Acc:AT1G10960]	13519	11293	12402	619.051	593.417	603.941	23157	22298	23790	1197.5921	1239.3699	1262.4373
AT1G10970	ZIP4	zinc transporter 4 precursor,[Source:TAIR;Acc:AT1G10970]	87	82	74	3.9838	4.3089	3.6036	88	29	57	4.551	1.6119	3.0248
AT1G10990	AT1G10990	unknown protein,[Source:TAIR;Acc:AT1G10990]	42	24	29	1.9232	1.2611	1.4122	26	16	26	1.3446	0.8893	1.3797
AT1G11000	MLO4	Seven transmembrane MLO family protein,[Source:TAIR;Acc:AT1G11000]	71	91	54	3.2512	4.7818	2.6296	69	69	133	3.5684	3.8352	7.0578
AT1G11020	AT1G11020	RING/FYVE/PHD zinc finger superfamily protein,[Source:TAIR;Acc:AT1G11020]	174	144	136	7.9677	7.5668	6.6228	210	186	214	10.8604	10.3383	11.3561
AT1G11050	AT1G11050	Protein kinase superfamily protein,[Source:TAIR;Acc:AT1G11050]	192	185	201	8.7919	9.7213	9.7881	169	132	145	8.74	7.3368	7.6946
AT1G11060	AT1G11060	WAPL (Wings apart-like protein regulation of heterochromatin) protein,[Source:TAIR;Acc:AT1G11060]	207	214	195	9.4788	11.2451	9.4959	247	241	226	12.7739	13.3953	11.9929
AT1G11070	AT1G11070	No description	43	53	59	1.969	2.785	2.8731	38	37	45	1.9652	2.0565	2.388
AT1G11080	scpl31	serine carboxypeptidase-like 31,[Source:TAIR;Acc:AT1G11080]	70	85	36	3.2054	4.4665	1.7531	41	82	31	2.1204	4.5577	1.645
AT1G11090	AT1G11090	alpha/beta-Hydrolases superfamily protein,[Source:TAIR;Acc:AT1G11090]	162	115	157	7.4182	6.0429	7.6454	136	147	155	7.0334	8.1706	8.2252
AT1G11090	AT1G11090	alpha/beta-Hydrolases superfamily protein,[Source:TAIR;Acc:AT1G11090]	55	68	60	2.5185	3.5732	2.9218	109	66	68	5.6371	3.6684	3.6085
AT1G11120	AT1G11120	unknown protein,[Source:TAIR;Acc:AT1G11120]	32	30	24	1.4653	1.5764	1.1687	26	21	17	1.3446	1.1672	0.9021
AT1G11130	SUB	Leucine-rich repeat protein kinase family protein,[Source:TAIR;Acc:AT1G11130]	186	210	250	8.5172	11.0349	12.1743	198	269	160	10.2398	14.9516	8.4905
AT1G11150	AT1G11150	transposable element gene,[Source:TAIR;Acc:AT1G11150]	106	68	55	4.8539	3.5732	2.6783	81	43	52	4.189	2.39	2.7594
AT1G11160	AT1G11160	Transducin/WD40 repeat-like superfamily protein,[Source:TAIR;Acc:AT1G11160]	40	41	31	1.8317	2.1544	1.5096	31	45	13	1.6032	2.5012	0.6899
AT1G11175	AT1G11175	other RNA,[Source:TAIR;Acc:AT1G11175]	65	41	65	2.9764	2.1544	3.1653	89	58	113	4.6027	3.2238	5.9964
AT1G11180	AT1G11180	Secretory carrier membrane protein (SCAMP) family protein,[Source:TAIR;Acc:AT1G11180]	34	29	36	1.5569	1.5239	1.7531	139	140	173	7.1886	7.7815	9.1804
AT1G11190	BFN1	bifunctional nuclease i,[Source:TAIR;Acc:AT1G11190]	27	16	25	1.2364	0.8408	1.2174	63	43	29	3.2581	2.39	1.5389
AT1G11200	AT1G11200	Protein of unknown function (DUF300),[Source:TAIR;Acc:AT1G11200]	213	183	184	9.7535	9.6162	8.9603	146	118	168	7.5506	6.5587	8.9151
AT1G11220	AT1G11220	Protein of unknown function (DUF761),[Source:TAIR;Acc:AT1G11220]	46	40	29	2.1064	2.1019	1.4122	14	20	9	0.724	1.1116	0.4776
AT1G11240	AT1G11240	No description	265	269	250	12.1347	14.1352	12.1743	225	219	255	11.6361	12.1725	13.5318
AT1G11260	STP1	sugar transporter 1,[Source:TAIR;Acc:AT1G11260]	1402	742	993	64.1992	38.9901	48.3562	4117	1611	3616	212.9156	89.5428	191.8862
AT1G11270	AT1G11270	F-box and associated interaction domains-containing protein,[Source:TAIR;Acc:AT1G11270]	55	60	65	2.5185	3.1528	3.1653	84	71	112	4.3442	3.9463	5.9434
AT1G11280	AT1G11280	S-locus lectin protein kinase family protein,[Source:TAIR;Acc:AT1G11280]	509	447	397	23.3077	23.4886	19.3327	569	480	498	29.4265	26.6794	26.4268
AT1G11290	CRR22	Pentatricopeptide repeat (PPR) superfamily protein,[Source:TAIR;Acc:AT1G11290]	112	99	96	5.1286	5.2022	4.6749	98	99	147	5.0682	5.5026	7.8007
AT1G11300	AT1G11300	protein serine/threonine kinases;protein kinases;ATP binding;sugar binding;kinases;carbohydrate binding,[Source:TAIR;Acc:AT1G11300]	92	94	119	4.2128	4.9395	5.795	71	89	84	3.6719	4.9468	4.4575
AT1G11310	MLO2	Seven transmembrane MLO family protein,[Source:TAIR;Acc:AT1G11310]	453	493	504	20.7434	25.9058	24.5433	734	691	833	37.9597	38.4072	44.2039
AT1G11320	AT1G11320	unknown protein,[Source:TAIR;Acc:AT1G11320]	106	87	90	4.8539	4.5716	4.3827	56	73	72	2.8961	4.0575	3.8207
AT1G11330	AT1G11330	S-locus lectin protein kinase family protein,[Source:TAIR;Acc:AT1G11330]	294	403	374	13.4626	21.1766	18.2127	183	161	275	9.4641	8.9487	14.5931
AT1G11340	AT1G11340	S-locus lectin protein kinase family protein,[Source:TAIR;Acc:AT1G11340]	65	54	44	2.9764	2.8376	2.1427	45	44	52	2.3272	2.4456	2.7594
AT1G11350	CBRLK1	S-domain-1 13,[Source:TAIR;Acc:AT1G11350]	190	161	232	8.7003	8.4601	11.2977	219	224	316	11.3258	12.4504	16.7688
AT1G11360	AT1G11360	Adenine nucleotide alpha hydrolases-like superfamily protein,[Source:TAIR;Acc:AT1G11360]	306	285	281	14.0121	14.976	13.6839	304	266	305	15.7217	14.7848	16.1851
AT1G11380	AT1G11380	PLAC8 family protein,[Source:TAIR;Acc:AT1G11380]	215	176	193	9.8451	9.2483	9.3985	267	208	223	13.8082	11.5611	11.8337
AT1G11390	AT1G11390	Protein kinase superfamily protein,[Source:TAIR;Acc:AT1G11390]	347	333	350	15.8895	17.4983	17.044	272	203	282	14.0668	11.2832	14.9646
AT1G11400	PYM	partner of Y14-MAGO,[Source:TAIR;Acc:AT1G11400]	306	254	236	14.0121	13.347	11.4925	317	246	302	16.394	13.6732	16.0259
AT1G11410	AT1G11410	S-locus lectin protein kinase family protein,[Source:TAIR;Acc:AT1G11410]	461	389	490	21.1097	20.4409	23.8616	332	306	333	17.1698	17.0081	17.6709
AT1G11420	ATDUF2	DOMAIN OF UNKNOWN FUNCTION 724 2,[Source:TAIR;Acc:AT1G11420]	67	50	69	3.068	2.6274	3.3601	15	29	15	0.7757	1.6119	0.796
AT1G11430	AT1G11430	plastid developmental protein DAG, putative,[Source:TAIR;Acc:AT1G11430]	1266	932	894	57.9716	48.9741	43.5352	1694	1683	1965	87.6072	93.5447	104.2745
AT1G11440	AT1G11440	No description	171	198	146	7.8303	10.4044	7.1098	170	167	116	8.7918	9.2822	6.1556
AT1G11450	AT1G11450	nodulin MtN21 /EamA-like transporter family protein,[Source:TAIR;Acc:AT1G11450]	108	101	71	4.9455	5.3073	3.4575	118	149	50	6.1025	8.2817	2.6533
AT1G11475	NRPB10	RNA polymerases N / 8 kDa subunit,[Source:TAIR;Acc:AT1G11475]	81	111	92	3.7091	5.8328	4.4801	154	151	210	7.9643	8.3929	11.1438
AT1G11480	AT1G11480	eukaryotic translation initiation factor-related,[Source:TAIR;Acc:AT1G11480]	990	927	991	45.3333	48.7114	48.2588	980	765	1130	50.6819	42.5203	59.9644
AT1G11520	AT1G11520	pliceosome associated protein-related,[Source:TAIR;Acc:AT1G11520]	149	151	118	6.8229	7.9346	5.7463	76	69	81	3.9304	3.8352	4.2983
AT1G11530	ATCXXS1	C-terminal cysteine residue is changed to a serine 1,[Source:TAIR;Acc:AT1G11530]	59	50	64	2.7017	2.6274	3.1166	181	154	194	9.3606	8.5596	10.2948
AT1G11530	ATCXXS1	C-terminal cysteine residue is changed to a serine 1,[Source:TAIR;Acc:AT1G11530]	29	26	17	1.3279	1.3662	0.8279	44	36	23	2.2755	2.001	1.2205
AT1G11545	XTH8	xyloglucan endotransglucosylase/hydrolase 8,[Source:TAIR;Acc:AT1G11545]	243	312	204	11.1273	16.3948	9.9342	346	355	300	17.8938	19.7316	15.9198
AT1G11580	ATPMEPCRA	methylesterase PCR A,[Source:TAIR;Acc:AT1G11580]	1875	2076	1495	85.8585	109.088	72.8021	1167	1329	530	60.3528	73.8686	28.1249
AT1G11592	AT1G11592	other RNA,[Source:TAIR;Acc:AT1G11592]	56	60	46	2.5643	3.1528	2.2401	124	79	93	6.4128	4.391	4.9351
AT1G11600	CYP77B1	cytochrome P450, family 77, subfamily B, polypeptide 1,[Source:TAIR;Acc:AT1G11600]	498	257	221	22.804	13.5047	10.7621	95	129	39	4.913	7.1701	2.0696
AT1G11630	AT1G11630	Tetratricopeptide repeat (TPR)-like superfamily protein,[Source:TAIR;Acc:AT1G11630]	144	139	127	6.5939	7.3041	6.1845	129	124	144	6.6714	6.8922	7.6415
AT1G11650	ATRBP45B	RNA-binding (RRM/RBD/RNP motifs) family protein,[Source:TAIR;Acc:AT1G11650]	3903	3632	3632	178.723	190.852	176.868	3496	3322	3552	180.7998	184.6438	188.49
AT1G11660	AT1G11660	heat shock protein 70 (Hsp 70) family protein,[Source:TAIR;Acc:AT1G11660]	566	575	655	25.9178	30.2147	31.8966	538	532	676	27.8233	29.5697	35.8725
AT1G11670	AT1G11670	MATE efflux family protein,[Source:TAIR;Acc:AT1G11670]	281	259	243	12.8673	13.6098	11.8334	422	440	238	21.8242	24.4561	12.6297
AT1G11680	CYP51G1	CYTOCHROME P450 51G1,[Source:TAIR;Acc:AT1G11680]	2166	2210	2103	99.1837	116.13	102.41	1765	1501	1992	91.2791	83.4287	105.7072
AT1G11700	AT1G11700	Protein of unknown function, DUF584,[Source:TAIR;Acc:AT1G11700]	423	382	433	19.3697	20.0731	21.0858	134	130	132	6.93	7.2257	7.0047
AT1G11710	AT1G11710	Pentatricopeptide repeat (PPR) superfamily protein,[Source:TAIR;Acc:AT1G11710]	175	126	132	8.0135	6.621	6.428	42	30	50	2.1721	1.6675	2.6533
AT1G11720	SS3	starch synthase 3,[Source:TAIR;Acc:AT1G11720]	883	801	856	40.4336	42.0904	41.6847	1088	1124	1004	56.2672	62.4743	53.2781
AT1G11740	AT1G11740	ankyrin repeat family protein,[Source:TAIR;Acc:AT1G11740]	26	26	5	1.1906	1.3662	0.2435	25	20	5	1.2929	1.1116	0.2653
AT1G11750	CLPP6	CLP protease proteolytic subunit 6,[Source:TAIR;Acc:AT1G11750]	86	75	92	3.938	3.9411	4.4801	101	115	140	5.2233	6.3919	7.4292
AT1G11750	CLPP6	CLP protease proteolytic subunit 6,[Source:TAIR;Acc:AT1G11750]	583	552	497	26.6963	29.0061	24.2024	1056	1169	1148	54.6123	64.9755	60.9196
AT1G11760	AT1G11760	MED32,[Source:TAIR;Acc:AT1G11760]	99	81	86	4.5333	4.2563	4.188	92	51	79	4.7579	2.8347	4.1922
AT1G11770	AT1G11770	FAD-binding Berberine family protein,[Source:TAIR;Acc:AT1G11770]	138	183	167	6.3192	9.6162	8.1324	107	125	158	5.5336	6.9478	8.3844
AT1G11790	ADT1	arogenate dehydratase 1,[Source:TAIR;Acc:AT1G11790]	107	148	126	4.8997	7.777	6.1358	415	364	457	21.4622	20.2319	24.2511
AT1G11800	AT1G11800	endonuclease/exonuclease/phosphatase family protein,[Source:TAIR;Acc:AT1G11800]	181	149	165	8.2882	7.8296	8.035	97	99	141	5.0165	5.5026	7.4823
AT1G11810	AT1G11810	F-box associated ubiquitination effector family protein,[Source:TAIR;Acc:AT1G11810]	88	37	64	4.0296	1.9443	3.1166	20	12	18	1.0343	0.667	0.9552
AT1G11810	AT1G11810	F-box associated ubiquitination effector family protein,[Source:TAIR;Acc:AT1G11810]	1258	952	845	57.6053	50.025	41.149	1358	980	1129	70.2306	54.4705	59.9114
AT1G11840	GLX1	glyoxalase I homolog,[Source:TAIR;Acc:AT1G11840]	1516	1636	2100	69.4194	85.9674	102.264	1840	2073	2349	95.1578	115.2217	124.6518
AT1G11850	AT1G11850	unknown protein,[Source:TAIR;Acc:AT1G11850]	922	661	508	42.2195	34.7338	24.7381	542	286	604	28.0302	15.8965	32.0518
AT1G11860	AT1G11860	Glycine cleavage T-protein family,[Source:TAIR;Acc:AT1G11860]	15739	14139	13996	720.707	742.966	681.564	23088	22931	18244	1194.0237	1274.5534	968.1339
AT1G11870	ATSRS	Seryl-tRNA synthetase,[Source:TAIR;Acc:AT1G11870]	311	294	252	14.2411	15.4489	12.2717	426	499	485	22.0311	27.7355	25.737
AT1G11880	AT1G11880	transferases, transferring hexosyl groups,[Source:TAIR;Acc:AT1G11880]	33	47	49	1.5111	2.4697	2.3862	74	75	90	3.827	4.1687	4.7759
AT1G11890	SEC22	Synaptobrevin family protein,[Source:TAIR;Acc:AT1G11890]	49	47	61	2.2438	2.4697	2.9705	39	37	45	2.0169	2.0565	2.388
AT1G11890	SEC22	Synaptobrevin family protein,[Source:TAIR;Acc:AT1G11890]	307	307	319	14.0579	16.132	15.5344	434	409	498	22.4448	22.7331	26.4268
AT1G11905	AT1G11905	B-cell receptor-associated protein 31-like,[Source:TAIR;Acc:AT1G11905]	130	120	132	5.9529	6.3057	6.428	162	140	162	8.378	7.7815	8.5967
AT1G11910	APA1	aspartic proteinase A1,[Source:TAIR;Acc:AT1G11910]	3564	3429	3886	163.2	180.185	189.237	5545	5623	6476	286.7663	312.5382	343.6546
AT1G11930	AT1G11930	Predicted pyridoxal phosphate-dependent enzyme, YBL036C type,[Source:TAIR;Acc:AT1G11930]	568	378	473	26.0094	19.8629	23.0337	468	397	463	24.2032	22.0661	24.5695
AT1G11940	AT1G11940	Core-2/I-branching beta-1,6-N-acetylglucosaminyltransferase family protein,[Source:TAIR;Acc:AT1G11940]	38	46	40	1.7401	2.4172	1.9479	47	44	66	2.4307	2.4456	3.5023
AT1G11950	AT1G11950	Transcription factor jumonji (jmjC) domain-containing protein,[Source:TAIR;Acc:AT1G11950]	103	73	99	4.7165	3.836	4.821	47	58	58	2.4307	3.2238	3.0778
AT1G11960	AT1G11960	ERD (early-responsive to dehydration stress) family protein,[Source:TAIR;Acc:AT1G11960]	98	102	102	4.4875	5.3598	4.9671	128	96	98	6.6197	5.3359	5.2005
AT1G12000	AT1G12000	Phosphofructokinase family protein,[Source:TAIR;Acc:AT1G12000]	793	937	802	36.3124	49.2368	39.0551	1715	1599	1974	88.6933	88.8758	104.752
AT1G12010	AT1G12010	2-oxoglutarate (2OG) and Fe(II)-dependent oxygenase superfamily protein,[Source:TAIR;Acc:AT1G12010]	74	62	61	3.3886	3.2579	2.9705	99	43	39	5.1199	2.39	2.0696
AT1G12020	AT1G12020	unknown protein,[Source:TAIR;Acc:AT1G12020]	308	247	351	14.1037	12.9792	17.0927	152	116	205	7.8609	6.4475	10.8785
AT1G12040	LRX1	leucine-rich repeat/extensin 1,[Source:TAIR;Acc:AT1G12040]	324	393	325	14.8363	20.6511	15.8265	680	723	432	35.167	40.1859	22.9245
AT1G12050	AT1G12050	fumarylacetoacetase, putative,[Source:TAIR;Acc:AT1G12050]	164	155	180	7.5098	8.1448	8.7655	418	421	483	21.6174	23.4001	25.6308
AT1G12060	ATBAG5	BCL-2-associated athanogene 5,[Source:TAIR;Acc:AT1G12060]	108	91	79	4.9455	4.7818	3.8471	73	56	74	3.7753	3.1126	3.9269
AT1G12080	AT1G12080	Vacuolar calcium-binding protein-related,[Source:TAIR;Acc:AT1G12080]	602	551	225	27.5663	28.9536	10.9568	217	234	96	11.2224	13.0062	5.0943
AT1G12090	ELP	extensin-like protein,[Source:TAIR;Acc:AT1G12090]	2026	1643	1858	92.7729	86.3352	90.4792	4384	2900	4313	226.7238	161.1881	228.8731
AT1G12110	NRT1,1	nitrate transporter 1,1,[Source:TAIR;Acc:AT1G12110]	1611	1738	1596	73.7696	91.3272	77.7205	1826	1740	1246	94.4338	96.7129	66.1201
AT1G12120	AT1G12120	Plant protein of unknown function (DUF863),[Source:TAIR;Acc:AT1G12120]	606	539	532	27.7495	28.323	25.9068	573	460	592	29.6334	25.5678	31.415
AT1G12140	FMO GS-OX5	flavin-monooxygenase glucosinolate S-oxygenase 5,[Source:TAIR;Acc:AT1G12140]	613	570	609	28.07	29.952	29.6565	578	608	486	29.892	33.7939	25.79
AT1G12140	FMO GS-OX5	flavin-monooxygenase glucosinolate S-oxygenase 5,[Source:TAIR;Acc:AT1G12140]	19	30	18	0.87	1.5764	0.8765	27	34	18	1.3963	1.8898	0.9552
AT1G12160	AT1G12160	Flavin-binding monooxygenase family protein,[Source:TAIR;Acc:AT1G12160]	66	48	41	3.0222	2.5223	1.9966	55	52	31	2.8444	2.8903	1.645
AT1G12200	AT1G12200	Flavin-binding monooxygenase family protein,[Source:TAIR;Acc:AT1G12200]	206	206	337	9.433	10.8247	16.4109	137	150	296	7.0851	8.3373	15.7075
AT1G12210	RFL1	RPS5-like 1,[Source:TAIR;Acc:AT1G12210]	49	53	72	2.2438	2.785	3.5062	27	27	33	1.3963	1.5007	1.7512
AT1G12220	RPS5	Disease resistance protein (CC-NBS-LRR class) family,[Source:TAIR;Acc:AT1G12220]	117	150	186	5.3576	7.8821	9.0577	111	109	174	5.7405	6.0585	9.2335
AT1G12230	AT1G12230	Aldolase superfamily protein,[Source:TAIR;Acc:AT1G12230]	755	639	634	34.5723	33.5777	30.8739	1533	1282	1555	79.2809	71.2563	82.5174
AT1G12244	AT1G12244	Polynucleotidyl transferase, ribonuclease H-like superfamily protein,[Source:TAIR;Acc:AT1G12244]	93	77	84	4.2586	4.0461	4.0906	124	140	133	6.4128	7.7815	7.0578
AT1G12250	AT1G12250	Pentapeptide repeat-containing protein,[Source:TAIR;Acc:AT1G12250]	292	251	296	13.371	13.1894	14.4143	841	862	782	43.4933	47.9118	41.4975
AT1G12260	VND4	NAC 007,[Source:TAIR;Acc:AT1G12260]	46	50	42	2.1064	2.6274	2.0453	64	56	25	3.3098	3.1126	1.3266
AT1G12270	AT1G12270	stress-inducible protein, putative,[Source:TAIR;Acc:AT1G12270]	812	831	783	37.1824	43.6668	38.1298	657	670	778	33.9775	37.24	41.2853
AT1G12280	AT1G12280	LRR and NB-ARC domains-containing disease resistance protein,[Source:TAIR;Acc:AT1G12280]	117	105	95	5.3576	5.5175	4.6262	70	82	123	3.6201	4.5577	6.5271
AT1G12290	AT1G12290	Disease resistance protein (CC-NBS-LRR class) family,[Source:TAIR;Acc:AT1G12290]	46	45	62	2.1064	2.3646	3.0192	47	36	97	2.4307	2.001	5.1474
AT1G12320	AT1G12320	Protein of unknown function (DUF1442),[Source:TAIR;Acc:AT1G12320]	96	100	69	4.396	5.2547	3.3601	28	29	14	1.4481	1.6119	0.7429
AT1G12350	ATCOAB	4-phospho-panto-thenoylcysteine synthetase,[Source:TAIR;Acc:AT1G12350]	139	127	130	6.365	6.6735	6.3306	185	149	209	9.5675	8.2817	11.0908
AT1G12360	KEU	Sec1/munc18-like (SM) proteins superfamily,[Source:TAIR;Acc:AT1G12360]	249	209	225	11.402	10.9824	10.9568	632	520	693	32.6846	28.9027	36.7747
AT1G12360	KEU	Sec1/munc18-like (SM) proteins superfamily,[Source:TAIR;Acc:AT1G12360]	292	214	229	13.371	11.2451	11.1516	162	145	131	8.378	8.0594	6.9516
AT1G12380	AT1G12380	unknown protein,[Source:TAIR;Acc:AT1G12380]	155	136	102	7.0976	7.1464	4.9671	61	50	30	3.1547	2.7791	1.592
AT1G12390	AT1G12390	Cornichon family protein,[Source:TAIR;Acc:AT1G12390]	120	111	91	5.4949	5.8328	4.4314	143	105	136	7.3954	5.8361	7.217
AT1G12400	AT1G12400	Nucleotide excision repair, TFIIH, subunit TTDA,[Source:TAIR;Acc:AT1G12400]	43	63	40	1.969	3.3105	1.9479	64	39	68	3.3098	2.1677	3.6085
AT1G12410	CLPR2	CLP protease proteolytic subunit 2,[Source:TAIR;Acc:AT1G12410]	1023	791	824	46.8444	41.5649	40.1264	1525	1446	1772	78.8672	80.3717	94.0327
AT1G12420	ACR8	ACT domain repeat 8,[Source:TAIR;Acc:AT1G12420]	79	98	102	3.6175	5.1496	4.9671	97	64	56	5.0165	3.5573	2.9717
AT1G12430	ARK3	armadillo repeat kinesin 3,[Source:TAIR;Acc:AT1G12430]	263	235	268	12.0431	12.3486	13.0508	250	221	303	12.9291	12.2836	16.079
AT1G12440	AT1G12440	A20/AN1-like zinc finger family protein,[Source:TAIR;Acc:AT1G12440]	1317	925	1033	60.307	48.6063	50.3041	1451	1263	1289	75.0402	70.2002	68.4019
AT1G12450	AT1G12450	SNARE associated Golgi protein family,[Source:TAIR;Acc:AT1G12450]	41	58	58	1.8774	3.0477	2.8244	146	135	127	7.5506	7.5036	6.7394
AT1G12460	AT1G12460	Leucine-rich repeat protein kinase family protein,[Source:TAIR;Acc:AT1G12460]	304	257	201	13.9205	13.5047	9.7881	426	415	338	22.0311	23.0666	17.9363
AT1G12470	AT1G12470	zinc ion binding,[Source:TAIR;Acc:AT1G12470]	35	30	40	1.6027	1.5764	1.9479	72	61	77	3.7236	3.3905	4.0861
AT1G12470	AT1G12470	zinc ion binding,[Source:TAIR;Acc:AT1G12470]	393	383	420	17.9959	20.1256	20.4528	572	502	573	29.5817	27.9022	30.4067
AT1G12500	AT1G12500	Nucleotide-sugar transporter family protein,[Source:TAIR;Acc:AT1G12500]	1331	986	1057	60.9481	51.8117	51.4728	1090	960	1018	56.3707	53.3588	54.0211
AT1G12520	ATCCS	copper chaperone for SOD1,[Source:TAIR;Acc:AT1G12520]	767	424	396	35.1218	22.2801	19.284	1060	526	1187	54.8192	29.2362	62.9892
AT1G12530	AT1G12530	unknown protein,[Source:TAIR;Acc:AT1G12530]	154	180	177	7.0518	9.4585	8.6194	145	150	130	7.4988	8.3373	6.8986
AT1G12550	AT1G12550	D-isomer specific 2-hydroxyacid dehydrogenase family protein,[Source:TAIR;Acc:AT1G12550]	88	69	94	4.0296	3.6258	4.5775	128	89	94	6.6197	4.9468	4.9882
AT1G12560	ATEXPA7	expansin A7,[Source:TAIR;Acc:AT1G12560]	121	123	111	5.5407	6.4633	5.4054	164	187	96	8.4815	10.3939	5.0943
AT1G12570	AT1G12570	Glucose-methanol-choline (GMC) oxidoreductase family protein,[Source:TAIR;Acc:AT1G12570]	30	3	23	1.3737	0.1576	1.12	6	5	4	0.3103	0.2779	0.2123
AT1G12580	PEPKR1	phosphoenolpyruvate carboxylase-related kinase 1,[Source:TAIR;Acc:AT1G12580]	870	743	799	39.8383	39.0427	38.909	968	785	975	50.0613	43.632	51.7392
AT1G12620	AT1G12620	Pentatricopeptide repeat (PPR) superfamily protein,[Source:TAIR;Acc:AT1G12620]	122	102	80	5.5865	5.3598	3.8958	109	86	87	5.6371	4.7801	4.6167
AT1G12640	AT1G12640	MBOAT (membrane bound O-acyl transferase) family protein,[Source:TAIR;Acc:AT1G12640]	349	352	295	15.9811	18.4967	14.3656	607	585	562	31.3917	32.5155	29.823
AT1G12650	AT1G12650	unknown protein,[Source:TAIR;Acc:AT1G12650]	174	188	188	7.9677	9.8789	9.1551	162	148	168	8.378	8.2262	8.9151
AT1G12680	PEPKR2	phosphoenolpyruvate carboxylase-related kinase 2,[Source:TAIR;Acc:AT1G12680]	233	215	269	10.6693	11.2977	13.0995	337	302	322	17.4284	16.7858	17.0872
AT1G12700	AT1G12700	ATP binding;nucleic acid binding;helicases,[Source:TAIR;Acc:AT1G12700]	65	64	40	2.9764	3.363	1.9479	61	55	31	3.1547	3.057	1.645
AT1G12710	AtPP2-A12	phloem protein 2-A12,[Source:TAIR;Acc:AT1G12710]	76	70	72	3.4801	3.6783	3.5062	69	61	51	3.5684	3.3905	2.7064
AT1G12730	AT1G12730	GPI transamidase subunit PIG-U,[Source:TAIR;Acc:AT1G12730]	23	36	31	1.0532	1.8917	1.5096	54	50	41	2.7927	2.7791	2.1757
AT1G12740	CYP87A2	cytochrome P450, family 87, subfamily A, polypeptide 2,[Source:TAIR;Acc:AT1G12740]	95	145	60	4.3502	7.6194	2.9218	147	207	70	7.6023	11.5055	3.7146
AT1G12750	RBL6	RHOMBOID-like protein 6,[Source:TAIR;Acc:AT1G12750]	119	81	77	5.4492	4.2563	3.7497	177	172	130	9.1538	9.5601	6.8986
AT1G12760	AT1G12760	Zinc finger, C3HC4 type (RING finger) family protein,[Source:TAIR;Acc:AT1G12760]	766	651	646	35.076	34.2083	31.4583	887	793	764	45.8723	44.0766	40.5423
AT1G12770	ISE1	P-loop containing nucleoside triphosphate hydrolases superfamily protein,[Source:TAIR;Acc:AT1G12770]	1311	1078	1163	60.0322	56.646	56.6347	1044	1126	1432	53.9917	62.5855	75.9903
AT1G12775	AT1G12775	Pentatricopeptide repeat (PPR) superfamily protein,[Source:TAIR;Acc:AT1G12775]	509	406	628	23.3077	21.3342	30.5818	1265	1074	2156	65.421	59.6952	114.41
AT1G12775	AT1G12775	Pentatricopeptide repeat (PPR) superfamily protein,[Source:TAIR;Acc:AT1G12775]	60	53	66	2.7475	2.785	3.214	42	67	48	2.1721	3.724	2.5472
AT1G12790	AT1G12790	No description	26	11	19	1.1906	0.578	0.9252	43	51	72	2.2238	2.8347	3.8207
AT1G12800	AT1G12800	Nucleic acid-binding, OB-fold-like protein,[Source:TAIR;Acc:AT1G12800]	2253	1987	1904	103.168	104.412	92.7192	3931	3732	4246	203.2964	207.4324	225.3177
AT1G12810	AT1G12810	proline-rich family protein,[Source:TAIR;Acc:AT1G12810]	813	857	782	37.2282	45.033	38.0811	915	819	891	47.3203	45.5217	47.2817
AT1G12810	AT1G12810	proline-rich family protein,[Source:TAIR;Acc:AT1G12810]	342	264	280	15.6606	13.8725	13.6352	489	361	435	25.2892	20.0651	23.0837
AT1G12830	AT1G12830	unknown protein,[Source:TAIR;Acc:AT1G12830]	538	549	484	24.6357	28.8485	23.5694	194	171	218	10.0329	9.5045	11.5684
AT1G12840	DET3	vacuolar ATP synthase subunit C (VATC) / V-ATPase C subunit / vacuolar proton pump C subunit (DET3),[Source:TAIR;Acc:AT1G12840]	684	796	773	31.3212	41.8277	37.6428	1609	1519	1780	83.2114	84.4292	94.4573
AT1G12845	AT1G12845	unknown protein,[Source:TAIR;Acc:AT1G12845]	24	25	16	1.099	1.3137	0.7792	35	24	54	1.8101	1.334	2.8656
AT1G12850	AT1G12850	Phosphoglycerate mutase family protein,[Source:TAIR;Acc:AT1G12850]	753	751	732	34.4808	39.463	35.6463	693	541	724	35.8393	30.0699	38.4197
AT1G12860	SCRM2	basic helix-loop-helix (bHLH) DNA-binding superfamily protein,[Source:TAIR;Acc:AT1G12860]	378	305	246	17.3091	16.0269	11.9795	523	430	427	27.0476	23.9003	22.6591
AT1G12880	atnudt12	nudix hydrolase homolog 12,[Source:TAIR;Acc:AT1G12880]	46	35	37	2.1064	1.8392	1.8018	44	54	62	2.2755	3.0014	3.2901
AT1G12900	GAPA-2	glyceraldehyde 3-phosphate dehydrogenase A subunit 2,[Source:TAIR;Acc:AT1G12900]	12388	12116	11422	567.261	636.663	556.218	38336	38273	29873	1982.5923	2127.2942	1585.2371
AT1G12910	ATAN11	Transducin/WD40 repeat-like superfamily protein,[Source:TAIR;Acc:AT1G12910]	498	405	450	22.804	21.2817	21.9137	624	478	713	32.2709	26.5682	37.836
AT1G12920	ERF1-2	eukaryotic release factor 1-2,[Source:TAIR;Acc:AT1G12920]	2497	2730	2504	114.341	143.454	121.937	1534	1380	1692	79.3327	76.7033	89.7875
AT1G12930	AT1G12930	ARM repeat superfamily protein,[Source:TAIR;Acc:AT1G12930]	168	161	178	7.6929	8.4601	8.6681	304	263	320	15.7217	14.6181	16.9811
AT1G12950	RSH2	root hair specific 2,[Source:TAIR;Acc:AT1G12950]	25	38	65	1.1448	1.9968	3.1653	54	51	46	2.7927	2.8347	2.441
AT1G12970	PIRL3	plant intracellular ras group-related LRR 3,[Source:TAIR;Acc:AT1G12970]	97	94	129	4.4417	4.9395	6.2819	142	146	176	7.3437	8.115	9.3396
AT1G12990	AT1G12990	beta-1,4-N-acetylglucosaminyltransferase family protein,[Source:TAIR;Acc:AT1G12990]	183	150	171	8.3798	7.8821	8.3272	353	295	259	18.2558	16.3967	13.7441
AT1G13000	AT1G13000	Protein of unknown function (DUF707),[Source:TAIR;Acc:AT1G13000]	94	77	74	4.3044	4.0461	3.6036	111	123	179	5.7405	6.8366	9.4988
AT1G13020	EIF4B2	eukaryotic initiation factor 4B2,[Source:TAIR;Acc:AT1G13020]	1819	1521	1405	83.2942	79.9245	68.4194	623	501	621	32.2192	27.8466	32.9539
AT1G13030	AT1G13030	sphere organelles protein-related,[Source:TAIR;Acc:AT1G13030]	157	123	131	7.1892	6.4633	6.3793	84	85	110	4.3442	4.7245	5.8372
AT1G13040	AT1G13040	Pentatricopeptide repeat (PPR-like) superfamily protein,[Source:TAIR;Acc:AT1G13040]	94	84	74	4.3044	4.414	3.6036	28	35	43	1.4481	1.9454	2.2818
AT1G13050	AT1G13050	unknown protein,[Source:TAIR;Acc:AT1G13050]	48	47	32	2.198	2.4697	1.5583	42	34	51	2.1721	1.8898	2.7064
AT1G13060	PBE1	20S proteasome beta subunit E1,[Source:TAIR;Acc:AT1G13060]	825	769	776	37.7777	40.4089	37.7889	917	851	927	47.4238	47.3004	49.1921
AT1G13080	CYP71B2	cytochrome P450, family 71, subfamily B, polypeptide 2,[Source:TAIR;Acc:AT1G13080]	1172	1098	1281	53.6673	57.697	62.381	1210	905	776	62.5766	50.3018	41.1791
AT1G13090	CYP71B28	cytochrome P450, family 71, subfamily B, polypeptide 28,[Source:TAIR;Acc:AT1G13090]	392	457	536	17.9501	24.0141	26.1016	632	625	638	32.6846	34.7388	33.856
AT1G13100	CYP71B29	cytochrome P450, family 71, subfamily B, polypeptide 29,[Source:TAIR;Acc:AT1G13100]	112	154	195	5.1286	8.0923	9.4959	136	136	155	7.0334	7.5592	8.2252
AT1G13110	CYP71B7	cytochrome P450, family 71 subfamily B, polypeptide 7,[Source:TAIR;Acc:AT1G13110]	623	637	865	28.5279	33.4726	42.123	864	742	1061	44.6828	41.2419	56.3029
AT1G13120	emb1745	embryo defective 1745,[Source:TAIR;Acc:AT1G13120]	297	238	258	13.6	12.5063	12.5638	183	199	243	9.4641	11.0608	12.895
AT1G13130	AT1G13130	Cellulase (glycosyl hydrolase family 5) protein,[Source:TAIR;Acc:AT1G13130]	20	28	18	0.9158	1.4713	0.8765	21	29	9	1.086	1.6119	0.4776
AT1G13160	AT1G13160	ARM repeat superfamily protein,[Source:TAIR;Acc:AT1G13160]	1086	1156	1011	49.7292	60.7447	49.2327	304	332	408	15.7217	18.4533	21.6509
AT1G13160	AT1G13160	ARM repeat superfamily protein,[Source:TAIR;Acc:AT1G13160]	403	434	436	18.4538	22.8055	21.2319	316	309	379	16.3423	17.1749	20.112
AT1G13180	DIS1	Actin-like ATPase superfamily protein,[Source:TAIR;Acc:AT1G13180]	69	74	64	3.1596	3.8885	3.1166	115	100	148	5.9474	5.5582	7.8538
AT1G13190	AT1G13190	RNA-binding (RRM/RBD/RNP motifs) family protein,[Source:TAIR;Acc:AT1G13190]	975	824	838	44.6464	43.299	40.8081	889	694	957	45.9757	38.574	50.784
AT1G13190	AT1G13190	RNA-binding (RRM/RBD/RNP motifs) family protein,[Source:TAIR;Acc:AT1G13190]	69	75	54	3.1596	3.9411	2.6296	108	91	104	5.5853	5.058	5.5189
AT1G13210	ACA,l	autoinhibited Ca2+/ATPase II,[Source:TAIR;Acc:AT1G13210]	159	163	158	7.2808	8.5652	7.6941	236	216	226	12.205	12.0057	11.9929
AT1G13220	LINC2	nuclear matrix constituent protein-related,[Source:TAIR;Acc:AT1G13220]	512	454	392	23.4451	23.8565	19.0893	328	293	339	16.9629	16.2856	17.9893
AT1G13245	RTFL17	ROTUNDIFOLIA like 17,[Source:TAIR;Acc:AT1G13245]	890	1116	1313	40.7542	58.6428	63.9393	1346	1359	1244	69.61	75.5361	66.014
AT1G13250	GATL3	galacturonosyltransferase-like 3,[Source:TAIR;Acc:AT1G13250]	167	161	186	7.6471	8.4601	9.0577	309	267	361	15.9803	14.8404	19.1568
AT1G13260	RAV1	related to ABI3/VP1 1,[Source:TAIR;Acc:AT1G13260]	354	511	854	16.2101	26.8517	41.5873	508	347	607	26.2718	19.287	32.211
AT1G13270	MAP1C	methionine aminopeptidase 1B,[Source:TAIR;Acc:AT1G13270]	222	223	183	10.1656	11.7181	8.9116	347	360	486	17.9455	20.0096	25.79
AT1G13280	AOC4	allene oxide cyclase 4,[Source:TAIR;Acc:AT1G13280]	167	218	236	7.6471	11.4553	11.4925	222	221	235	11.481	12.2836	12.4705
AT1G13300	HRS1	myb-like transcription factor family protein,[Source:TAIR;Acc:AT1G13300]	104	84	86	4.7623	4.414	4.188	299	309	171	15.4631	17.1749	9.0743
AT1G13320	PP2AA3	protein phosphatase 2A subunit A3,[Source:TAIR;Acc:AT1G13320]	626	614	577	28.6653	32.2641	28.0982	1017	869	1131	52.5954	48.3009	60.0175
AT1G13330	AHP2	Arabidopsis Hop2 homolog,[Source:TAIR;Acc:AT1G13330]	61	86	135	2.7933	4.5191	6.5741	55	40	102	2.8444	2.2233	5.4127
AT1G13330	AHP2	Arabidopsis Hop2 homolog,[Source:TAIR;Acc:AT1G13330]	60	77	109	2.7475	4.0461	5.308	54	41	75	2.7927	2.2789	3.9799
AT1G13350	AT1G13350	Protein kinase superfamily protein,[Source:TAIR;Acc:AT1G13350]	564	412	421	25.8262	21.6495	20.5015	377	295	347	19.497	16.3967	18.4139
AT1G13360	AT1G13360	unknown protein,[Source:TAIR;Acc:AT1G13360]	926	753	692	42.4026	39.5681	33.6984	556	457	525	28.7542	25.401	27.8596
AT1G13380	AT1G13380	Protein of unknown function (DUF1218),[Source:TAIR;Acc:AT1G13380]	210	209	230	9.6162	10.9824	11.2003	299	250	328	15.4631	13.8955	17.4056
AT1G13390	AT1G13390	unknown protein,[Source:TAIR;Acc:AT1G13390]	262	203	189	11.9973	10.6671	9.2038	166	151	208	8.5849	8.3929	11.0377
AT1G13420	ATST4B	sulfotransferase 4B,[Source:TAIR;Acc:AT1G13420]	27	48	12	1.2364	2.5223	0.5844	27	52	8	1.3963	2.8903	0.4245
AT1G13430	ATST4C	sulfotransferase 4C,[Source:TAIR;Acc:AT1G13430]	20	28	10	0.9158	1.4713	0.487	21	21	3	1.086	1.1672	0.1592
AT1G13440	GAPC-2	glyceraldehyde-3-phosphate dehydrogenase C2,[Source:TAIR;Acc:AT1G13440]	11736	13310	13383	537.405	699.405	651.713	22921	20814	23887	1185.3871	1156.8861	1267.5847
AT1G13448	AT1G13448	other RNA,[Source:TAIR;Acc:AT1G13448]	316	262	288	14.47	13.7674	14.0248	411	379	484	21.2554	21.0656	25.6839
AT1G13448	AT1G13448	other RNA,[Source:TAIR;Acc:AT1G13448]	29	31	25	1.3279	1.629	1.2174	34	20	35	1.7584	1.1116	1.8573
AT1G13460	AT1G13460	Protein phosphatase 2A regulatory B subunit family protein,[Source:TAIR;Acc:AT1G13460]	251	294	225	11.4936	15.4489	10.9568	208	197	179	10.757	10.9497	9.4988
AT1G13520	AT1G13520	Protein of unknown function (DUF1262),[Source:TAIR;Acc:AT1G13520]	18	13	29	0.8242	0.6831	1.4122	12	11	8	0.6206	0.6114	0.4245
AT1G13560	AAPT1	aminoalcoholphosphotransferase 1,[Source:TAIR;Acc:AT1G13560]	198	140	141	9.0667	7.3566	6.8663	499	410	521	25.8064	22.7887	27.6473
AT1G13570	AT1G13570	F-box/RNI-like superfamily protein,[Source:TAIR;Acc:AT1G13570]	146	156	184	6.6855	8.1974	8.9603	231	208	289	11.9464	11.5611	15.336
AT1G13580	LAG13	LAG1 longevity assurance homolog 3,[Source:TAIR;Acc:AT1G13580]	81	95	97	3.7091	4.992	4.7236	143	116	125	7.3954	6.4475	6.6332
AT1G13590	ATPSK1	phytosulfokine 1 precursor,[Source:TAIR;Acc:AT1G13590]	64	84	81	2.9306	4.414	3.9445	121	86	50	6.2577	4.7801	2.6533
AT1G13600	AtbZIP58	basic leucine-zipper 58,[Source:TAIR;Acc:AT1G13600]	97	76	92	4.4417	3.9936	4.4801	33	37	15	1.7066	2.0565	0.796
AT1G13609	AT1G13609	Defensin-like (DEFL) family protein,[Source:TAIR;Acc:AT1G13609]	412	566	632	18.866	29.7418	30.7766	271	351	164	14.0151	19.5093	8.7028
AT1G13630	AT1G13630	Tetratricopeptide repeat (TPR)-like superfamily protein,[Source:TAIR;Acc:AT1G13630]	56	44	43	2.5643	2.3121	2.094	37	53	39	1.9135	2.9459	2.0696
AT1G13640	AT1G13640	Phosphatidylinositol 3- and 4-kinase family protein,[Source:TAIR;Acc:AT1G13640]	1262	1305	1207	57.7885	68.5742	58.7774	1612	1107	1753	83.3665	61.5294	93.0245
AT1G13650	AT1G13650	No description	322	267	285	14.7448	14.0301	13.8787	373	824	242	19.2901	45.7997	12.8419
AT1G13670	AT1G13670	unknown protein,[Source:TAIR;Acc:AT1G13670]	190	132	86	8.7003	6.9363	4.188	61	60	40	3.1547	3.3349	2.1226
AT1G13690	ATE1	ATPase E1,[Source:TAIR;Acc:AT1G13690]	288	240	230	13.1879	12.6114	11.2003	199	199	265	10.2915	11.0608	14.0625
AT1G13690	ATE1	ATPase E1,[Source:TAIR;Acc:AT1G13690]	53	38	135	2.4269	1.9968	6.5741	229	155	247	11.843	8.6152	13.1073
AT1G13710	CYP78A5	cytochrome P450, family 78, subfamily A, polypeptide 5,[Source:TAIR;Acc:AT1G13710]	375	352	819	17.1717	18.4967	39.8829	140	113	125	7.2403	6.2808	6.6332
AT1G13730	AT1G13730	Nuclear transport factor 2 (NTF2) family protein with RNA binding (RRM-RBD-RNP motifs) domain,[Source:TAIR;Acc:AT1G13730]	603	639	509	27.6121	33.5777	24.7868	277	272	290	14.3254	15.1183	15.3891
AT1G13740	AFP2	ABI five binding protein 2,[Source:TAIR;Acc:AT1G13740]	351	253	245	16.0727	13.2945	11.9308	94	75	108	4.8613	4.1687	5.7311
AT1G13740	AFP2	ABI five binding protein 2,[Source:TAIR;Acc:AT1G13740]	44	52	57	2.0148	2.7325	2.7757	45	50	47	2.3272	2.7791	2.4941
AT1G13770	RUS3	Protein of unknown function, DUF647,[Source:TAIR;Acc:AT1G13770]	52	38	36	2.3811	1.9968	1.7531	91	89	107	4.7062	4.9468	5.678
AT1G13780	AT1G13780	F-box/RNI-like/FBD-like domains-containing protein,[Source:TAIR;Acc:AT1G13780]	89	82	107	4.0754	4.3089	5.2106	81	80	106	4.189	4.4466	5.625
AT1G13790	AT1G13790	XH/XS domain-containing protein,[Source:TAIR;Acc:AT1G13790]	58	70	90	2.6559	3.6783	4.3827	48	54	61	2.4824	3.0014	3.237
AT1G13800	AT1G13800	Tetratricopeptide repeat (TPR)-like superfamily protein,[Source:TAIR;Acc:AT1G13800]	43	36	33	1.969	1.8917	1.607	19	26	31	0.9826	1.4451	1.645
AT1G13810	AT1G13810	Restriction endonuclease, type II-like superfamily protein,[Source:TAIR;Acc:AT1G13810]	152	162	202	6.9603	8.5127	9.8368	92	89	106	4.7579	4.9468	5.625
AT1G13820	AT1G13820	alpha/beta-Hydrolases superfamily protein,[Source:TAIR;Acc:AT1G13820]	202	193	213	9.2498	10.1416	10.3725	735	586	745	38.0114	32.5711	39.5341
AT1G13830	AT1G13830	Carbohydrate-binding X8 domain superfamily protein,[Source:TAIR;Acc:AT1G13830]	31	41	23	1.4195	2.1544	1.12	61	66	41	3.1547	3.6684	2.1757
AT1G13860	QUL1	QUASIMODO2 LIKE 1,[Source:TAIR;Acc:AT1G13860]	155	163	164	7.0976	8.5652	7.9863	166	183	245	8.5849	10.1715	13.0011
AT1G13870	DRL1	calmodulin binding;purine nucleotide binding,[Source:TAIR;Acc:AT1G13870]	247	282	235	11.3104	14.8183	11.4438	165	149	181	8.5332	8.2817	9.6049
AT1G13880	AT1G13880	ELM2 domain-containing protein,[Source:TAIR;Acc:AT1G13880]	361	323	341	16.5306	16.9728	16.6057	394	353	398	20.3762	19.6205	21.1202
AT1G13900	AT1G13900	Purple acid phosphatases superfamily protein,[Source:TAIR;Acc:AT1G13900]	415	366	393	19.0033	19.2323	19.138	505	452	526	26.1167	25.1231	27.9127
AT1G13910	AT1G13910	Leucine-rich repeat (LRR) family protein,[Source:TAIR;Acc:AT1G13910]	18	15	24	0.8242	0.7882	1.1687	28	39	23	1.4481	2.1677	1.2205
AT1G13920	AT1G13920	Remorin family protein,[Source:TAIR;Acc:AT1G13920]	37	62	44	1.6943	3.2579	2.1427	27	22	18	1.3963	1.2228	0.9552
AT1G13930	AT1G13930	Involved in response to salt stress, Knockout mutants are hypersensitive to salt stress,,[Source:TAIR;Acc:AT1G13930]	2460	1861	2187	112.646	97.7906	106.501	2703	2519	2584	139.7889	140.0113	137.1222
AT1G13940	AT1G13940	Plant protein of unknown function (DUF863),[Source:TAIR;Acc:AT1G13940]	289	298	335	13.2337	15.6591	16.3135	306	280	379	15.8252	15.563	20.112
AT1G13950	EIF-5A	eukaryotic elongation factor 5A-1,[Source:TAIR;Acc:AT1G13950]	52	60	53	2.3811	3.1528	2.581	87	62	58	4.4993	3.4461	3.0778
AT1G13960	WRKY4	WRKY DNA-binding protein 4,[Source:TAIR;Acc:AT1G13960]	289	229	259	13.2337	12.0333	12.6125	313	299	346	16.1872	16.6191	18.3608
AT1G13970	AT1G13970	Protein of unknown function (DUF1336),[Source:TAIR;Acc:AT1G13970]	40	48	30	1.8317	2.5223	1.4609	70	56	39	3.6201	3.1126	2.0696
AT1G13980	GN	sec7 domain-containing protein,[Source:TAIR;Acc:AT1G13980]	932	849	937	42.6774	44.6127	45.6292	1200	993	1291	62.0594	55.193	68.5081
AT1G13990	AT1G13990	unknown protein,[Source:TAIR;Acc:AT1G13990]	405	293	401	18.5454	15.3964	19.5275	167	185	230	8.6366	10.2827	12.2052
AT1G14000	VIK	VH1-interacting kinase,[Source:TAIR;Acc:AT1G14000]	181	202	218	8.2882	10.6146	10.616	218	197	284	11.2741	10.9497	15.0707
AT1G14000	VIK	VH1-interacting kinase,[Source:TAIR;Acc:AT1G14000]	471	416	393	21.5676	21.8597	19.138	784	666	769	40.5455	37.0177	40.8077
AT1G14020	AT1G14020	O-fucosyltransferase family protein,[Source:TAIR;Acc:AT1G14020]	311	306	292	14.2411	16.0795	14.2195	197	254	249	10.1881	14.1179	13.2134
AT1G14020	AT1G14020	O-fucosyltransferase family protein,[Source:TAIR;Acc:AT1G14020]	375	358	304	17.1717	18.8119	14.8039	439	513	548	22.7034	28.5136	29.0801
AT1G14040	AT1G14040	EXS (ERD1/XPR1/SYG1) family protein,[Source:TAIR;Acc:AT1G14040]	123	127	101	5.6323	6.6735	4.9184	111	130	93	5.7405	7.2257	4.9351
AT1G14060	AT1G14060	GCK domain-containing protein,[Source:TAIR;Acc:AT1G14060]	570	593	533	26.101	31.1606	25.9555	161	128	222	8.3263	7.1145	11.7806
AT1G14070	FUT7	fucosyltransferase 7,[Source:TAIR;Acc:AT1G14070]	85	63	58	3.8923	3.3105	2.8244	100	82	107	5.1716	4.5577	5.678
AT1G14080	FUT6	fucosyltransferase 6,[Source:TAIR;Acc:AT1G14080]	49	73	54	2.2438	3.836	2.6296	53	66	31	2.741	3.6684	1.645
AT1G14120	AT1G14120	2-oxoglutarate (2OG) and Fe(II)-dependent oxygenase superfamily protein,[Source:TAIR;Acc:AT1G14120]	112	117	199	5.1286	6.148	9.6907	220	197	248	11.3776	10.9497	13.1603
AT1G14130	AT1G14130	2-oxoglutarate (2OG) and Fe(II)-dependent oxygenase superfamily protein,[Source:TAIR;Acc:AT1G14130]	136	103	136	6.2276	5.4124	6.6228	114	88	119	5.8956	4.8912	6.3148
AT1G14140	AT1G14140	Mitochondrial substrate carrier family protein,[Source:TAIR;Acc:AT1G14140]	205	170	187	9.3872	8.933	9.1064	180	171	228	9.3089	9.5045	12.099
AT1G14150	PQL1	PsbQ-like 2,[Source:TAIR;Acc:AT1G14150]	581	452	450	26.6047	23.7514	21.9137	1445	1450	1069	74.7299	80.5941	56.7274
AT1G14150	PQL1	PsbQ-like 2,[Source:TAIR;Acc:AT1G14150]	48	56	35	2.198	2.9427	1.7044	162	140	95	8.378	7.7815	5.0413
AT1G14170	AT1G14170	RNA-binding KH domain-containing protein,[Source:TAIR;Acc:AT1G14170]	116	122	94	5.3118	6.4108	4.5775	178	125	66	9.2055	6.9478	3.5023
AT1G14180	AT1G14180	RING/U-box superfamily protein,[Source:TAIR;Acc:AT1G14180]	99	89	72	4.5333	4.6767	3.5062	61	70	54	3.1547	3.8907	2.8656
AT1G14185	AT1G14185	Glucose-methanol-choline (GMC) oxidoreductase family protein,[Source:TAIR;Acc:AT1G14185]	41	43	38	1.8774	2.2595	1.8505	64	81	26	3.3098	4.5022	1.3797
AT1G14190	AT1G14190	Glucose-methanol-choline (GMC) oxidoreductase family protein,[Source:TAIR;Acc:AT1G14190]	55	34	27	2.5185	1.7866	1.3148	41	42	10	2.1204	2.3344	0.5307
AT1G14200	AT1G14200	RING/U-box superfamily protein,[Source:TAIR;Acc:AT1G14200]	332	317	420	15.2027	16.6575	20.4528	269	203	318	13.9117	11.2832	16.875
AT1G14205	AT1G14205	Ribosomal L18p/L5e family protein,[Source:TAIR;Acc:AT1G14205]	414	461	460	18.9575	24.2243	22.4007	409	298	484	21.1519	16.5635	25.6839
AT1G14205	AT1G14205	Ribosomal L18p/L5e family protein,[Source:TAIR;Acc:AT1G14205]	106	114	139	4.8539	5.9904	6.7689	76	53	81	3.9304	2.9459	4.2983
AT1G14230	AT1G14230	GDA1/CD39 nucleoside phosphatase family protein,[Source:TAIR;Acc:AT1G14230]	245	193	274	11.2188	10.1416	13.343	247	210	333	12.7739	11.6722	17.6709
AT1G14240	AT1G14240	GDA1/CD39 nucleoside phosphatase family protein,[Source:TAIR;Acc:AT1G14240]	28	42	18	1.2822	2.207	0.8765	21	27	8	1.086	1.5007	0.4245
AT1G14260	AT1G14260	RING/FYVE/PHD zinc finger superfamily protein,[Source:TAIR;Acc:AT1G14260]	183	155	148	8.3798	8.1448	7.2072	602	535	607	31.1332	29.7364	32.211
AT1G14280	PKS2	phytochrome kinase substrate 2,[Source:TAIR;Acc:AT1G14280]	846	690	821	38.7393	36.2576	39.9803	1049	865	777	54.2503	48.0785	41.2322
AT1G14290	SBH2	sphingoid base hydroxylase 2,[Source:TAIR;Acc:AT1G14290]	349	282	310	15.9811	14.8183	15.0961	585	527	532	30.254	29.2918	28.231
AT1G14300	AT1G14300	ARM repeat superfamily protein,[Source:TAIR;Acc:AT1G14300]	187	195	178	8.563	10.2467	8.6681	133	141	160	6.8783	7.8371	8.4905
AT1G14310	AT1G14310	Haloacid dehalogenase-like hydrolase (HAD) superfamily protein,[Source:TAIR;Acc:AT1G14310]	39	36	30	1.7859	1.8917	1.4609	100	111	125	5.1716	6.1696	6.6332
AT1G14320	SAC52	Ribosomal protein L16p/L10e family protein,[Source:TAIR;Acc:AT1G14320]	9089	9606	8881	416.196	504.77	432.479	6327	6384	7394	327.2084	354.8362	392.3691
AT1G14330	AT1G14330	Galactose oxidase/kelch repeat superfamily protein,[Source:TAIR;Acc:AT1G14330]	285	253	274	13.0505	13.2945	13.343	323	253	304	16.7043	14.0623	16.132
AT1G14340	AT1G14340	RNA-binding (RRM/RBD/RNP motifs) family protein,[Source:TAIR;Acc:AT1G14340]	127	120	138	5.8155	6.3057	6.7202	159	172	179	8.2229	9.5601	9.4988
AT1G14345	AT1G14345	NAD(P)-linked oxidoreductase superfamily protein,[Source:TAIR;Acc:AT1G14345]	2254	1586	1849	103.213	83.34	90.0409	3068	3121	2019	158.6653	173.4718	107.14
AT1G14350	FLP	Duplicated homeodomain-like superfamily protein,[Source:TAIR;Acc:AT1G14350]	183	235	270	8.3798	12.3486	13.1482	206	172	351	10.6535	9.5601	18.6261
AT1G14350	FLP	Duplicated homeodomain-like superfamily protein,[Source:TAIR;Acc:AT1G14350]	187	180	186	8.563	9.4585	9.0577	129	185	93	6.6714	10.2827	4.9351
AT1G14370	APK2A	protein kinase 2A,[Source:TAIR;Acc:AT1G14370]	381	370	335	17.4464	19.4425	16.3135	432	430	477	22.3414	23.9003	25.3124
AT1G14370	APK2A	protein kinase 2A,[Source:TAIR;Acc:AT1G14370]	93	109	143	4.2586	5.7277	6.9637	137	113	141	7.0851	6.2808	7.4823
AT1G14390	AT1G14390	Leucine-rich repeat protein kinase family protein,[Source:TAIR;Acc:AT1G14390]	17	42	32	0.7785	2.207	1.5583	19	39	11	0.9826	2.1677	0.5837
AT1G14400	UBC1	ubiquitin carrier protein 1,[Source:TAIR;Acc:AT1G14400]	766	717	697	35.076	37.6764	33.9419	1419	1143	1360	73.3853	63.5304	72.1696
AT1G14410	ATWHY1	ssDNA-binding transcriptional regulator,[Source:TAIR;Acc:AT1G14410]	221	209	140	10.1199	10.9824	6.8176	234	221	283	12.1016	12.2836	15.0176
AT1G14430	AT1G14430	glyoxal oxidase-related protein,[Source:TAIR;Acc:AT1G14430]	283	181	117	12.9589	9.5111	5.6976	84	73	50	4.3442	4.0575	2.6533
AT1G14440	AtHB31	homeobox protein 31,[Source:TAIR;Acc:AT1G14440]	295	215	176	13.5084	11.2977	8.5707	209	126	171	10.8087	7.0033	9.0743
AT1G14450	AT1G14450	NADH dehydrogenase (ubiquinone)s,[Source:TAIR;Acc:AT1G14450]	534	650	612	24.4525	34.1558	29.8026	495	433	731	25.5995	24.0671	38.7912
AT1G14460	AT1G14460	AAA-type ATPase family protein,[Source:TAIR;Acc:AT1G14460]	390	370	327	17.8586	19.4425	15.9239	296	235	339	15.308	13.0618	17.9893
AT1G14480	AT1G14480	Ankyrin repeat family protein,[Source:TAIR;Acc:AT1G14480]	36	24	40	1.6485	1.2611	1.9479	21	10	22	1.086	0.5558	1.1674
AT1G14490	AT1G14490	Predicted AT-hook DNA-binding family protein,[Source:TAIR;Acc:AT1G14490]	60	35	29	2.7475	1.8392	1.4122	20	15	25	1.0343	0.8337	1.3266
AT1G14510	AL7	alfin-like 7,[Source:TAIR;Acc:AT1G14510]	633	619	511	28.9858	32.5268	24.8842	605	512	788	31.2883	28.458	41.8159
AT1G14520	MIOX1	myo-inositol oxygenase 1,[Source:TAIR;Acc:AT1G14520]	14	7	20	0.6411	0.3678	0.9739	47	20	32	2.4307	1.1116	1.6981
AT1G14530	THH1	Protein of unknown function (DUF1084),[Source:TAIR;Acc:AT1G14530]	38	26	22	1.7401	1.3662	1.0713	54	41	43	2.7927	2.2789	2.2818
AT1G14540	AT1G14540	Peroxidase superfamily protein,[Source:TAIR;Acc:AT1G14540]	49	44	27	2.2438	2.3121	1.3148	41	47	18	2.1204	2.6124	0.9552
AT1G14560	AT1G14560	Mitochondrial substrate carrier family protein,[Source:TAIR;Acc:AT1G14560]	182	156	162	8.334	8.1974	7.8889	193	177	204	9.9812	9.838	10.8254
AT1G14570	AT1G14570	UBX domain-containing protein,[Source:TAIR;Acc:AT1G14570]	531	490	461	24.3151	25.7482	22.4494	693	602	744	35.8393	33.4604	39.481
AT1G14580	AT1G14580	C2H2-like zinc finger protein,[Source:TAIR;Acc:AT1G14580]	337	250	237	15.4316	13.1368	11.5412	536	492	575	27.7199	27.3464	30.5129
AT1G14590	AT1G14590	Nucleotide-diphospho-sugar transferase family protein,[Source:TAIR;Acc:AT1G14590]	98	91	70	4.4875	4.7818	3.4088	98	67	104	5.0682	3.724	5.5189
AT1G14600	AT1G14600	Homeodomain-like superfamily protein,[Source:TAIR;Acc:AT1G14600]	44	51	55	2.0148	2.6799	2.6783	27	19	57	1.3963	1.0561	3.0248
AT1G14610	TWN2	valyl-tRNA synthetase / valine--tRNA ligase (VALRS),[Source:TAIR;Acc:AT1G14610]	2007	2312	1989	91.9029	121.489	96.8585	2108	1908	2321	109.0178	106.0507	123.1659
AT1G14620	DECOY	decoy,[Source:TAIR;Acc:AT1G14620]	230	208	187	10.532	10.9298	9.1064	163	197	250	8.4297	10.9497	13.2665
AT1G14630	AT1G14630	unknown protein,[Source:TAIR;Acc:AT1G14630]	42	22	78	1.9232	1.156	3.7984	31	30	43	1.6032	1.6675	2.2818
AT1G14640	AT1G14640	SWAP (Suppressor-of-White-APricot)/surp domain-containing protein,[Source:TAIR;Acc:AT1G14640]	50	39	87	2.2896	2.0494	4.2367	34	24	41	1.7584	1.334	2.1757
AT1G14650	AT1G14650	SWAP (Suppressor-of-White-APricot)/surp domain-containing protein / ubiquitin family protein,[Source:TAIR;Acc:AT1G14650]	1711	1772	1664	78.3487	93.1138	81.0319	1199	1060	1475	62.0077	58.917	78.2722
AT1G14660	NHX8	Na+/H+ exchanger 8,[Source:TAIR;Acc:AT1G14660]	33	31	28	1.5111	1.629	1.3635	35	26	41	1.8101	1.4451	2.1757
AT1G14670	AT1G14670	Endomembrane protein 70 protein family,[Source:TAIR;Acc:AT1G14670]	1608	1497	1492	73.6322	78.6633	72.656	2094	1592	2213	108.2937	88.4867	117.4348
AT1G14685	BPC2	basic pentacysteine 2,[Source:TAIR;Acc:AT1G14685]	344	345	326	15.7522	18.1288	15.8752	725	607	771	37.4942	33.7383	40.9138
AT1G14687	AtHB32	homeobox protein 32,[Source:TAIR;Acc:AT1G14687]	43	27	42	1.969	1.4188	2.0453	47	47	52	2.4307	2.6124	2.7594
AT1G14690	MAP65-7	microtubule-associated protein 65-7,[Source:TAIR;Acc:AT1G14690]	395	352	370	18.0875	18.4967	18.0179	364	382	312	18.8247	21.2324	16.5566
AT1G14700	PAP3	purple acid phosphatase 3,[Source:TAIR;Acc:AT1G14700]	212	203	302	9.7077	10.6671	14.7065	577	684	425	29.8402	38.0182	22.553
AT1G14710	AT1G14710	hydroxyproline-rich glycoprotein family protein,[Source:TAIR;Acc:AT1G14710]	1493	1216	1518	68.3662	63.8975	73.9222	1126	971	1334	58.2324	53.9702	70.7899
AT1G14720	XTR2	xyloglucan endotransglucosylase/hydrolase 28,[Source:TAIR;Acc:AT1G14720]	536	511	922	24.5441	26.8517	44.8987	563	508	743	29.1162	28.2357	39.4279
AT1G14730	AT1G14730	Cytochrome b561/ferric reductase transmembrane protein family,[Source:TAIR;Acc:AT1G14730]	130	94	75	5.9529	4.9395	3.6523	123	116	41	6.3611	6.4475	2.1757
AT1G14740	AT1G14740	Protein of unknown function (DUF1423),[Source:TAIR;Acc:AT1G14740]	1231	1126	1188	56.3689	59.1683	57.8521	1507	1109	1713	77.9363	61.6406	90.9019
AT1G14770	AT1G14770	RING/FYVE/PHD zinc finger superfamily protein,[Source:TAIR;Acc:AT1G14770]	114	73	97	5.2202	3.836	4.7236	95	82	110	4.913	4.5577	5.8372
AT1G14780	AT1G14780	MAC/Perforin domain-containing protein,[Source:TAIR;Acc:AT1G14780]	35	37	107	1.6027	1.9443	5.2106	69	66	174	3.5684	3.6684	9.2335
AT1G14780	AT1G14780	MAC/Perforin domain-containing protein,[Source:TAIR;Acc:AT1G14780]	85	71	151	3.8923	3.7309	7.3533	75	54	119	3.8787	3.0014	6.3148
AT1G14800	AT1G14800	Nucleic acid-binding, OB-fold-like protein,[Source:TAIR;Acc:AT1G14800]	1746	1462	1507	79.9514	76.8242	73.3865	1311	1319	1689	67.7999	73.3128	89.6283
AT1G14820	AT1G14820	Sec14p-like phosphatidylinositol transfer family protein,[Source:TAIR;Acc:AT1G14820]	143	110	176	6.5481	5.7802	8.5707	97	86	128	5.0165	4.7801	6.7924
AT1G14830	ADL1C	DYNAMIN-like 1C,[Source:TAIR;Acc:AT1G14830]	562	583	530	25.7346	30.6351	25.8095	871	843	1101	45.0448	46.8557	58.4255
AT1G14840	MAP70-4	microtubule-associated proteins 70-4,[Source:TAIR;Acc:AT1G14840]	383	339	343	17.538	17.8135	16.7031	577	554	468	29.8402	30.7925	24.8348
AT1G14850	NUP155	nucleoporin 155,[Source:TAIR;Acc:AT1G14850]	790	769	755	36.175	40.4089	36.7663	664	652	756	34.3396	36.2395	40.1178
AT1G14860	atnudt18	nudix hydrolase homolog 18,[Source:TAIR;Acc:AT1G14860]	73	90	91	3.3428	4.7293	4.4314	195	166	154	10.0847	9.2266	8.1721
AT1G14870	PCR2	PLANT CADMIUM RESISTANCE 2,[Source:TAIR;Acc:AT1G14870]	329	273	232	15.0653	14.3454	11.2977	575	592	453	29.7368	32.9046	24.0388
AT1G14890	AT1G14890	Plant invertase/pectin methylesterase inhibitor superfamily protein,[Source:TAIR;Acc:AT1G14890]	344	279	538	15.7522	14.6607	26.199	512	474	682	26.4787	26.3459	36.1909
AT1G14900	HMGA	high mobility group A,[Source:TAIR;Acc:AT1G14900]	521	488	374	23.8572	25.6431	18.2127	693	640	521	35.8393	35.5726	27.6473
AT1G14910	AT1G14910	ENTH/ANTH/VHS superfamily protein,[Source:TAIR;Acc:AT1G14910]	210	194	210	9.6162	10.1942	10.2264	513	458	590	26.5304	25.4566	31.3089
AT1G14920	GAI	GRAS family transcription factor family protein,[Source:TAIR;Acc:AT1G14920]	516	447	415	23.6283	23.4886	20.2093	1182	970	861	61.1286	53.9146	45.6897
AT1G14970	AT1G14970	O-fucosyltransferase family protein,[Source:TAIR;Acc:AT1G14970]	102	58	79	4.6707	3.0477	3.8471	49	44	61	2.5341	2.4456	3.237
AT1G14980	CPN10	chaperonin 10,[Source:TAIR;Acc:AT1G14980]	1149	1396	1248	52.6141	73.3561	60.774	1104	1116	1397	57.0947	62.0296	74.133
AT1G14990	AT1G14990	unknown protein,[Source:TAIR;Acc:AT1G14990]	78	71	93	3.5717	3.7309	4.5288	77	66	91	3.9821	3.6684	4.829
AT1G15000	scpl50	serine carboxypeptidase-like 50,[Source:TAIR;Acc:AT1G15000]	320	208	198	14.6532	10.9298	9.642	182	155	162	9.4123	8.6152	8.5967
AT1G15020	ATQSOX1	quiescin-sulfhydryl oxidase 1,[Source:TAIR;Acc:AT1G15020]	199	186	191	9.1125	9.7738	9.3011	250	205	274	12.9291	11.3943	14.5401
AT1G15030	AT1G15030	Protein of unknown function (DUF789),[Source:TAIR;Acc:AT1G15030]	662	530	650	30.3138	27.8501	31.6531	739	685	731	38.2183	38.0737	38.7912
AT1G15030	AT1G15030	Protein of unknown function (DUF789),[Source:TAIR;Acc:AT1G15030]	351	209	488	16.0727	10.9824	23.7642	897	507	623	46.3894	28.1801	33.06
AT1G15060	AT1G15060	Uncharacterised conserved protein UCP031088, alpha/beta hydrolase,[Source:TAIR;Acc:AT1G15060]	363	279	262	16.6222	14.6607	12.7586	594	558	561	30.7194	31.0148	29.77
AT1G15080	ATPAP2	lipid phosphate phosphatase 2,[Source:TAIR;Acc:AT1G15080]	18	21	19	0.8242	1.1035	0.9252	16	33	19	0.8275	1.8342	1.0083
AT1G15100	RHA2A	RING-H2 finger A2A,[Source:TAIR;Acc:AT1G15100]	815	490	460	37.3198	25.7482	22.4007	246	245	186	12.7222	13.6176	9.8703
AT1G15110	AT1G15110	phosphatidyl serine synthase family protein,[Source:TAIR;Acc:AT1G15110]	108	114	89	4.9455	5.9904	4.334	153	126	122	7.9126	7.0033	6.474
AT1G15120	AT1G15120	Ubiquinol-cytochrome C reductase hinge protein,[Source:TAIR;Acc:AT1G15120]	366	478	386	16.7596	25.1176	18.7971	623	586	622	32.2192	32.5711	33.007
AT1G15130	AT1G15130	Endosomal targeting BRO1-like domain-containing protein,[Source:TAIR;Acc:AT1G15130]	1289	1292	1375	59.0248	67.8911	66.9585	1317	1163	1475	68.1102	64.642	78.2722
AT1G15140	AT1G15140	FAD/NAD(P)-binding oxidoreductase,[Source:TAIR;Acc:AT1G15140]	842	646	717	38.5562	33.9456	34.9158	1200	1194	1090	62.0594	66.365	57.8418
AT1G15160	AT1G15160	MATE efflux family protein,[Source:TAIR;Acc:AT1G15160]	140	106	108	6.4108	5.57	5.2593	42	42	35	2.1721	2.3344	1.8573
AT1G15165	AT1G15165	RING/FYVE/PHD zinc finger superfamily protein,[Source:TAIR;Acc:AT1G15165]	124	92	76	5.6781	4.8344	3.701	63	78	49	3.2581	4.3354	2.6002
AT1G15170	AT1G15170	MATE efflux family protein,[Source:TAIR;Acc:AT1G15170]	222	190	213	10.1656	9.984	10.3725	259	212	273	13.3945	11.7834	14.487
AT1G15170	AT1G15170	MATE efflux family protein,[Source:TAIR;Acc:AT1G15170]	22	10	21	1.0074	0.5255	1.0226	40	54	33	2.0686	3.0014	1.7512
AT1G15180	AT1G15180	MATE efflux family protein,[Source:TAIR;Acc:AT1G15180]	496	300	420	22.7124	15.7642	20.4528	878	801	986	45.4068	44.5213	52.323
AT1G15200	AT1G15200	protein-protein interaction regulator family protein,[Source:TAIR;Acc:AT1G15200]	1017	945	801	46.5696	49.6572	39.0064	605	523	734	31.2883	29.0694	38.9504
AT1G15210	PDR7	pleiotropic drug resistance 7,[Source:TAIR;Acc:AT1G15210]	758	734	526	34.7097	38.5697	25.6147	606	822	349	31.34	45.6885	18.52
AT1G15215	AT1G15215	No description	44	43	33	2.0148	2.2595	1.607	50	63	65	2.5858	3.5017	3.4493
AT1G15215	AT1G15215	No description	53	45	51	2.4269	2.3646	2.4836	75	85	86	3.8787	4.7245	4.5637
AT1G15230	AT1G15230	unknown protein,[Source:TAIR;Acc:AT1G15230]	399	319	410	18.2707	16.7626	19.9658	290	206	388	14.9977	11.4499	20.5896
AT1G15240	AT1G15240	Phox-associated domain;Phox-like;Sorting nexin, C-terminal,[Source:TAIR;Acc:AT1G15240]	468	393	404	21.4303	20.6511	19.6736	469	454	573	24.2549	25.2343	30.4067
AT1G15250	AT1G15250	Zinc-binding ribosomal protein family protein,[Source:TAIR;Acc:AT1G15250]	159	186	154	7.2808	9.7738	7.4994	166	195	190	8.5849	10.8385	10.0825
AT1G15260	AT1G15260	unknown protein,[Source:TAIR;Acc:AT1G15260]	442	405	427	20.2397	21.2817	20.7937	679	615	466	35.1153	34.183	24.7287
AT1G15270	AT1G15270	Translation machinery associated TMA7,[Source:TAIR;Acc:AT1G15270]	284	378	300	13.0047	19.8629	14.6091	997	901	1173	51.5611	50.0795	62.2463
AT1G15280	AT1G15280	CASC3/Barentsz eIF4AIII binding,[Source:TAIR;Acc:AT1G15280]	1003	841	853	45.9286	44.1923	41.5386	766	661	805	39.6146	36.7398	42.718
AT1G15290	AT1G15290	Tetratricopeptide repeat (TPR)-like superfamily protein,[Source:TAIR;Acc:AT1G15290]	5511	5060	5639	252.355	265.889	274.603	4142	4545	3796	214.2085	252.6207	201.4381
AT1G15300	AT1G15300	transposable element gene,[Source:TAIR;Acc:AT1G15300]	103	95	97	4.7165	4.992	4.7236	47	40	48	2.4307	2.2233	2.5472
AT1G15310	ATHSRP54A	signal recognition particle 54 kDa subunit,[Source:TAIR;Acc:AT1G15310]	92	81	162	4.2128	4.2563	7.8889	105	66	151	5.4302	3.6684	8.0129
AT1G15330	AT1G15330	Cystathionine beta-synthase (CBS) protein,[Source:TAIR;Acc:AT1G15330]	34	18	7	1.5569	0.9459	0.3409	6	4	0	0.3103	0.2223	0
AT1G15340	MBD10	methyl-CPG-binding domain 10,[Source:TAIR;Acc:AT1G15340]	2678	2210	1834	122.629	116.13	89.3104	1548	1504	1330	80.0567	83.5955	70.5776
AT1G15350	AT1G15350	unknown protein,[Source:TAIR;Acc:AT1G15350]	164	154	147	7.5098	8.0923	7.1585	233	228	258	12.0499	12.6727	13.691
AT1G15370	AT1G15370	SNARE-like superfamily protein,[Source:TAIR;Acc:AT1G15370]	294	304	292	13.4626	15.9744	14.2195	366	292	309	18.9281	16.23	16.3974
AT1G15380	AT1G15380	Lactoylglutathione lyase / glyoxalase I family protein,[Source:TAIR;Acc:AT1G15380]	328	242	211	15.0195	12.7165	10.2751	285	220	208	14.7391	12.2281	11.0377
AT1G15405	AT1G15405	other RNA,[Source:TAIR;Acc:AT1G15405]	65	12	96	2.9764	0.6306	4.6749	42	63	162	2.1721	3.5017	8.5967
AT1G15410	AT1G15410	aspartate-glutamate racemase family,[Source:TAIR;Acc:AT1G15410]	100	88	53	4.5791	4.6242	2.581	18	20	22	0.9309	1.1116	1.1674
AT1G15410	AT1G15410	aspartate-glutamate racemase family,[Source:TAIR;Acc:AT1G15410]	372	373	272	17.0343	19.6001	13.2456	358	252	337	18.5144	14.0067	17.8832
AT1G15420	AT1G15420	No description	442	482	465	20.2397	25.3278	22.6441	214	177	237	11.0673	9.838	12.5766
AT1G15430	AT1G15430	Protein of unknown function (DUF1644),[Source:TAIR;Acc:AT1G15430]	148	133	170	6.7771	6.9888	8.2785	156	134	188	8.0677	7.448	9.9764
AT1G15440	PWP2	periodic tryptophan protein 2,[Source:TAIR;Acc:AT1G15440]	1106	1157	1061	50.645	60.7972	51.6676	312	354	485	16.1355	19.6761	25.737
AT1G15460	ATBOR4	HCO3- transporter family,[Source:TAIR;Acc:AT1G15460]	22	28	14	1.0074	1.4713	0.6818	29	50	18	1.4998	2.7791	0.9552
AT1G15470	AT1G15470	Transducin/WD40 repeat-like superfamily protein,[Source:TAIR;Acc:AT1G15470]	142	163	161	6.5024	8.5652	7.8402	165	166	210	8.5332	9.2266	11.1438
AT1G15480	AT1G15480	Tetratricopeptide repeat (TPR)-like superfamily protein,[Source:TAIR;Acc:AT1G15480]	233	210	166	10.6693	11.0349	8.0837	99	95	120	5.1199	5.2803	6.3679
AT1G15490	AT1G15490	alpha/beta-Hydrolases superfamily protein,[Source:TAIR;Acc:AT1G15490]	141	152	116	6.4566	7.9872	5.6489	122	152	135	6.3094	8.4485	7.1639
AT1G15500	ATNTT2	TLC ATP/ADP transporter,[Source:TAIR;Acc:AT1G15500]	5011	4017	3719	229.46	211.083	181.104	5103	3948	5995	263.9078	219.4382	318.13
AT1G15510	ATECB2	Tetratricopeptide repeat (TPR)-like superfamily protein,[Source:TAIR;Acc:AT1G15510]	405	333	383	18.5454	17.4983	18.651	186	268	263	9.6192	14.896	13.9563
AT1G15520	PDR12	pleiotropic drug resistance 12,[Source:TAIR;Acc:AT1G15520]	115	86	99	5.266	4.5191	4.821	53	44	87	2.741	2.4456	4.6167
AT1G15530	AT1G15530	Concanavalin A-like lectin protein kinase family protein,[Source:TAIR;Acc:AT1G15530]	201	189	194	9.204	9.9314	9.4472	252	235	239	13.0325	13.0618	12.6827
AT1G15550	GA4	gibberellin 3-oxidase 1,[Source:TAIR;Acc:AT1G15550]	166	219	180	7.6013	11.5079	8.7655	257	250	142	13.2911	13.8955	7.5354
AT1G15570	CYCA2;3	CYCLIN A2;3,[Source:TAIR;Acc:AT1G15570]	75	81	47	3.4343	4.2563	2.2888	132	105	111	6.8265	5.8361	5.8903
AT1G15660	CENP-C	centromere protein C,[Source:TAIR;Acc:AT1G15660]	189	179	130	8.6545	9.406	6.3306	199	178	183	10.2915	9.8936	9.7111
AT1G15670	AT1G15670	Galactose oxidase/kelch repeat superfamily protein,[Source:TAIR;Acc:AT1G15670]	344	356	468	15.7522	18.7068	22.7902	1030	745	967	53.2677	41.4087	51.3147
AT1G15690	AVP1	Inorganic H pyrophosphatase family protein,[Source:TAIR;Acc:AT1G15690]	161	149	139	7.3724	7.8296	6.7689	123	119	126	6.3611	6.6143	6.6863
AT1G15690	AVP1	Inorganic H pyrophosphatase family protein,[Source:TAIR;Acc:AT1G15690]	10129	9276	10203	463.819	487.429	496.856	13818	11963	12334	714.6145	664.9288	654.5146
AT1G15710	AT1G15710	prephenate dehydrogenase family protein,[Source:TAIR;Acc:AT1G15710]	590	457	573	27.0168	24.0141	27.9034	308	350	384	15.9286	19.4537	20.3773
AT1G15720	TRFL5	TRF-like 5,[Source:TAIR;Acc:AT1G15720]	379	300	294	17.3549	15.7642	14.3169	846	742	843	43.7519	41.2419	44.7345
AT1G15720	TRFL5	TRF-like 5,[Source:TAIR;Acc:AT1G15720]	71	62	65	3.2512	3.2579	3.1653	53	43	46	2.741	2.39	2.441
AT1G15740	AT1G15740	Leucine-rich repeat family protein,[Source:TAIR;Acc:AT1G15740]	2173	2106	1968	99.5042	110.665	95.8358	3110	2575	3298	160.8374	143.1239	175.0113
AT1G15740	AT1G15740	Leucine-rich repeat family protein,[Source:TAIR;Acc:AT1G15740]	411	394	550	18.8202	20.7036	26.7834	1335	1027	1261	69.0411	57.0828	66.9161
AT1G15780	AT1G15780	unknown protein,[Source:TAIR;Acc:AT1G15780]	799	810	883	36.5872	42.5633	42.9995	1037	915	1072	53.6297	50.8576	56.8866
AT1G15790	AT1G15790	unknown protein,[Source:TAIR;Acc:AT1G15790]	14	22	17	0.6411	1.156	0.8279	25	16	43	1.2929	0.8893	2.2818
AT1G15810	AT1G15810	S15/NS1, RNA-binding protein,[Source:TAIR;Acc:AT1G15810]	37198	27499	31846	1703.34	1445	1550.81	55975	55405	48017	2894.8144	3079.5269	2548.0644
AT1G15810	AT1G15810	S15/NS1, RNA-binding protein,[Source:TAIR;Acc:AT1G15810]	1326	1266	1423	60.7191	66.5249	69.2959	1269	1396	1037	65.6279	77.5926	55.0293
AT1G15825	AT1G15825	hydroxyproline-rich glycoprotein family protein,[Source:TAIR;Acc:AT1G15825]	184	112	160	8.4256	5.8853	7.7915	127	107	64	6.568	5.9473	3.3962
AT1G15830	AT1G15830	unknown protein,[Source:TAIR;Acc:AT1G15830]	547	348	357	25.0478	18.2865	17.3849	472	420	244	24.41	23.3445	12.9481
AT1G15860	AT1G15860	Domain of unknown function (DUF298),[Source:TAIR;Acc:AT1G15860]	151	169	159	6.9145	8.8805	7.7428	338	285	354	17.4801	15.8409	18.7853
AT1G15870	AT1G15870	Mitochondrial glycoprotein family protein,[Source:TAIR;Acc:AT1G15870]	47	41	51	2.1522	2.1544	2.4836	26	14	26	1.3446	0.7781	1.3797
AT1G15880	GOS11	golgi snare 11,[Source:TAIR;Acc:AT1G15880]	199	185	190	9.1125	9.7213	9.2524	478	332	445	24.7203	18.4533	23.6143
AT1G15885	AT1G15885	unknown protein,[Source:TAIR;Acc:AT1G15885]	27	22	20	1.2364	1.156	0.9739	41	34	43	2.1204	1.8898	2.2818
AT1G15890	AT1G15890	Disease resistance protein (CC-NBS-LRR class) family,[Source:TAIR;Acc:AT1G15890]	41	33	37	1.8774	1.7341	1.8018	32	24	22	1.6549	1.334	1.1674
AT1G15910	AT1G15910	XH/XS domain-containing protein,[Source:TAIR;Acc:AT1G15910]	361	322	369	16.5306	16.9202	17.9692	272	258	302	14.0668	14.3402	16.0259
AT1G15920	AT1G15920	Polynucleotidyl transferase, ribonuclease H-like superfamily protein,[Source:TAIR;Acc:AT1G15920]	290	199	262	13.2794	10.4569	12.7586	293	256	321	15.1528	14.229	17.0341
AT1G15930	AT1G15930	Ribosomal protein L7Ae/L30e/S12e/Gadd45 family protein,[Source:TAIR;Acc:AT1G15930]	3462	3300	2932	158.529	173.406	142.78	2521	2614	3054	130.3765	145.2916	162.0632
AT1G15940	AT1G15940	Tudor/PWWP/MBT superfamily protein,[Source:TAIR;Acc:AT1G15940]	590	593	579	27.0168	31.1606	28.1956	412	348	442	21.3071	19.3426	23.4551
AT1G15950	CCR1	cinnamoyl coa reductase 1,[Source:TAIR;Acc:AT1G15950]	1285	1126	1180	58.8417	59.1683	57.4625	855	843	694	44.2174	46.8557	36.8277
AT1G15950	CCR1	cinnamoyl coa reductase 1,[Source:TAIR;Acc:AT1G15950]	3555	2888	3284	162.788	151.757	159.921	2607	2530	2110	134.8241	140.6227	111.969
AT1G15970	AT1G15970	DNA glycosylase superfamily protein,[Source:TAIR;Acc:AT1G15970]	156	165	155	7.1434	8.6703	7.5481	196	184	202	10.1364	10.2271	10.7193
AT1G15980	NDF1	NDH-dependent cyclic electron flow 1,[Source:TAIR;Acc:AT1G15980]	1096	990	993	50.1871	52.0218	48.3562	3483	3656	3113	180.1275	203.2082	165.1941
AT1G15980	NDF1	NDH-dependent cyclic electron flow 1,[Source:TAIR;Acc:AT1G15980]	36	30	32	1.6485	1.5764	1.5583	37	45	32	1.9135	2.5012	1.6981
AT1G16000	AT1G16000	unknown protein,[Source:TAIR;Acc:AT1G16000]	283	273	269	12.9589	14.3454	13.0995	134	141	216	6.93	7.8371	11.4622
AT1G16010	MGT2	magnesium transporter 2,[Source:TAIR;Acc:AT1G16010]	781	735	761	35.7629	38.6223	37.0585	707	535	839	36.5634	29.7364	44.5223
AT1G16020	AT1G16020	Protein of unknown function (DUF1712),[Source:TAIR;Acc:AT1G16020]	307	246	248	14.0579	12.9266	12.0769	301	265	258	15.5666	14.7293	13.691
AT1G16030	Hsp70b	heat shock protein 70B,[Source:TAIR;Acc:AT1G16030]	119	80	116	5.4492	4.2038	5.6489	95	64	106	4.913	3.5573	5.625
AT1G16040	AT1G16040	No description	63	66	74	2.8848	3.4681	3.6036	70	58	96	3.6201	3.2238	5.0943
AT1G16060	ADAP	ARIA-interacting double AP2 domain protein,[Source:TAIR;Acc:AT1G16060]	65	57	53	2.9764	2.9952	2.581	95	67	44	4.913	3.724	2.3349
AT1G16080	AT1G16080	unknown protein,[Source:TAIR;Acc:AT1G16080]	1083	1045	1041	49.5919	54.9119	50.6937	2056	2445	1794	106.3285	135.8983	95.2002
AT1G16090	WAKL7	wall associated kinase-like 7,[Source:TAIR;Acc:AT1G16090]	103	63	51	4.7165	3.3105	2.4836	52	36	34	2.6892	2.001	1.8042
AT1G16110	WAKL6	wall associated kinase-like 6,[Source:TAIR;Acc:AT1G16110]	37	24	65	1.6943	1.2611	3.1653	39	37	54	2.0169	2.0565	2.8656
AT1G16130	WAKL2	wall associated kinase-like 2,[Source:TAIR;Acc:AT1G16130]	21	25	26	0.9616	1.3137	1.2661	55	27	55	2.8444	1.5007	2.9186
AT1G16150	WAKL4	wall associated kinase-like 4,[Source:TAIR;Acc:AT1G16150]	21	24	29	0.9616	1.2611	1.4122	15	31	13	0.7757	1.723	0.6899
AT1G16170	AT1G16170	unknown protein,[Source:TAIR;Acc:AT1G16170]	111	93	112	5.0828	4.8869	5.4541	373	378	332	19.2901	21.01	17.6179
AT1G16180	AT1G16180	Serinc-domain containing serine and sphingolipid biosynthesis protein,[Source:TAIR;Acc:AT1G16180]	1615	1585	1631	73.9528	83.2875	79.4249	2349	1962	2490	121.4814	109.0521	132.134
AT1G16190	RAD23A	Rad23 UV excision repair protein family,[Source:TAIR;Acc:AT1G16190]	117	153	129	5.3576	8.0397	6.2819	193	155	172	9.9812	8.6152	9.1273
AT1G16210	AT1G16210	unknown protein,[Source:TAIR;Acc:AT1G16210]	1195	1157	1036	54.7205	60.7972	50.4502	774	711	866	40.0283	39.5189	45.9551
AT1G16220	AT1G16220	Protein phosphatase 2C family protein,[Source:TAIR;Acc:AT1G16220]	58	43	38	2.6559	2.2595	1.8505	35	38	32	1.8101	2.1121	1.6981
AT1G16240	SYP51	syntaxin of plants 51,[Source:TAIR;Acc:AT1G16240]	454	393	399	20.7892	20.6511	19.4301	700	580	778	36.2013	32.2376	41.2853
AT1G16250	AT1G16250	Galactose oxidase/kelch repeat superfamily protein,[Source:TAIR;Acc:AT1G16250]	102	106	110	4.6707	5.57	5.3567	183	168	201	9.4641	9.3378	10.6662
AT1G16260	AT1G16260	Wall-associated kinase family protein,[Source:TAIR;Acc:AT1G16260]	231	216	244	10.5778	11.3502	11.8821	381	372	323	19.7039	20.6765	17.1403
AT1G16270	AT1G16270	Protein kinase superfamily protein with octicosapeptide/Phox/Bem1p domain,[Source:TAIR;Acc:AT1G16270]	820	726	792	37.5488	38.1494	38.5681	639	570	727	33.0467	31.6818	38.5789
AT1G16280	RH36	RNA helicase 36,[Source:TAIR;Acc:AT1G16280]	274	279	269	12.5468	14.6607	13.0995	131	119	190	6.7748	6.6143	10.0825
AT1G16300	GAPCP-2	glyceraldehyde-3-phosphate dehydrogenase of plastid 2,[Source:TAIR;Acc:AT1G16300]	130	163	101	5.9529	8.5652	4.9184	155	174	152	8.016	9.6713	8.066
AT1G16310	AT1G16310	Cation efflux family protein,[Source:TAIR;Acc:AT1G16310]	79	76	50	3.6175	3.9936	2.4349	35	44	12	1.8101	2.4456	0.6368
AT1G16320	AT1G16320	Uncharacterized conserved protein (DUF2358),[Source:TAIR;Acc:AT1G16320]	749	748	780	34.2976	39.3054	37.9837	947	1072	783	48.9752	59.584	41.5506
AT1G16330	CYCB3;1	cyclin b3;1,[Source:TAIR;Acc:AT1G16330]	19	25	11	0.87	1.3137	0.5357	12	22	14	0.6206	1.2228	0.7429
AT1G16340	ATKDSA2	Aldolase superfamily protein,[Source:TAIR;Acc:AT1G16340]	32	31	36	1.4653	1.629	1.7531	78	85	139	4.0339	4.7245	7.3762
AT1G16350	AT1G16350	Aldolase-type TIM barrel family protein,[Source:TAIR;Acc:AT1G16350]	1423	1447	1423	65.1609	76.036	69.2959	1052	1173	1373	54.4054	65.1978	72.8595
AT1G16370	ATOCT6	organic cation/carnitine transporter 6,[Source:TAIR;Acc:AT1G16370]	26	34	37	1.1906	1.7866	1.8018	48	68	34	2.4824	3.7796	1.8042
AT1G16390	ATOCT3	organic cation/carnitine transporter 3,[Source:TAIR;Acc:AT1G16390]	479	283	211	21.934	14.8709	10.2751	190	297	101	9.8261	16.5079	5.3597
AT1G16400	CYP79F2	cytochrome P450, family 79, subfamily F, polypeptide 2,[Source:TAIR;Acc:AT1G16400]	310	577	353	14.1953	30.3198	17.1901	206	250	107	10.6535	13.8955	5.678
AT1G16410	CYP79F1	cytochrome p450 79f1,[Source:TAIR;Acc:AT1G16410]	517	486	304	23.674	25.538	14.8039	365	753	103	18.8764	41.8533	5.4658
AT1G16430	AT1G16430	Surfeit locus protein 5 subunit 22 of Mediator complex,[Source:TAIR;Acc:AT1G16430]	77	70	89	3.5259	3.6783	4.334	31	32	37	1.6032	1.7786	1.9634
AT1G16445	AT1G16445	S-adenosyl-L-methionine-dependent methyltransferases superfamily protein,[Source:TAIR;Acc:AT1G16445]	60	50	47	2.7475	2.6274	2.2888	45	44	62	2.3272	2.4456	3.2901
AT1G16460	RDH2	rhodanese homologue 2,[Source:TAIR;Acc:AT1G16460]	267	252	234	12.2262	13.2419	11.3951	470	418	579	24.3066	23.2333	30.7251
AT1G16470	PAB1	proteasome subunit PAB1,[Source:TAIR;Acc:AT1G16470]	98	75	101	4.4875	3.9411	4.9184	349	371	523	18.049	20.621	27.7535
AT1G16480	AT1G16480	Tetratricopeptide repeat (TPR)-like superfamily protein,[Source:TAIR;Acc:AT1G16480]	66	58	56	3.0222	3.0477	2.727	18	26	23	0.9309	1.4451	1.2205
AT1G16489	AT1G16489	other RNA,[Source:TAIR;Acc:AT1G16489]	31	31	32	1.4195	1.629	1.5583	22	18	31	1.1378	1.0005	1.645
AT1G16500	AT1G16500	unknown protein,[Source:TAIR;Acc:AT1G16500]	48	37	38	2.198	1.9443	1.8505	50	51	54	2.5858	2.8347	2.8656
AT1G16510	AT1G16510	SAUR-like auxin-responsive protein family,[Source:TAIR;Acc:AT1G16510]	40	32	97	1.8317	1.6815	4.7236	17	17	42	0.8792	0.9449	2.2288
AT1G16520	AT1G16520	unknown protein,[Source:TAIR;Acc:AT1G16520]	118	151	137	5.4034	7.9346	6.6715	135	140	121	6.9817	7.7815	6.421
AT1G16540	SIR3	molybdenum cofactor sulfurase (LOS5) (ABA3),[Source:TAIR;Acc:AT1G16540]	94	93	86	4.3044	4.8869	4.188	117	109	127	6.0508	6.0585	6.7394
AT1G16560	AT1G16560	Per1-like family protein,[Source:TAIR;Acc:AT1G16560]	378	395	387	17.3091	20.7562	18.8458	629	490	725	32.5295	27.2352	38.4728
AT1G16560	AT1G16560	Per1-like family protein,[Source:TAIR;Acc:AT1G16560]	79	78	62	3.6175	4.0987	3.0192	136	117	153	7.0334	6.5031	8.1191
AT1G16590	REV7	DNA-binding HORMA family protein,[Source:TAIR;Acc:AT1G16590]	27	20	28	1.2364	1.051	1.3635	24	14	27	1.2412	0.7781	1.4328
AT1G16610	SR45	arginine/serine-rich 45,[Source:TAIR;Acc:AT1G16610]	571	542	508	26.1468	28.4806	24.7381	578	631	640	29.892	35.0723	33.9622
AT1G16630	AT1G16630	unknown protein,[Source:TAIR;Acc:AT1G16630]	222	195	142	10.1656	10.2467	6.915	59	88	50	3.0513	4.8912	2.6533
AT1G16650	AT1G16650	S-adenosyl-L-methionine-dependent methyltransferases superfamily protein,[Source:TAIR;Acc:AT1G16650]	61	72	89	2.7933	3.7834	4.334	64	57	81	3.3098	3.1682	4.2983
AT1G16670	AT1G16670	Protein kinase superfamily protein,[Source:TAIR;Acc:AT1G16670]	79	77	98	3.6175	4.0461	4.7723	101	101	93	5.2233	5.6138	4.9351
AT1G16680	AT1G16680	Chaperone DnaJ-domain superfamily protein,[Source:TAIR;Acc:AT1G16680]	244	286	308	11.173	15.0285	14.9987	266	214	261	13.7565	11.8946	13.8502
AT1G16690	AT1G16690	Enhancer of polycomb-like transcription factor protein,[Source:TAIR;Acc:AT1G16690]	94	87	63	4.3044	4.5716	3.0679	72	65	77	3.7236	3.6128	4.0861
AT1G16700	AT1G16700	Alpha-helical ferredoxin,[Source:TAIR;Acc:AT1G16700]	387	353	343	17.7212	18.5492	16.7031	546	508	603	28.237	28.2357	31.9987
AT1G16710	HAC12	histone acetyltransferase of the CBP family 12,[Source:TAIR;Acc:AT1G16710]	648	607	598	29.6727	31.8962	29.1209	571	533	587	29.53	29.6253	31.1497
AT1G16740	AT1G16740	Ribosomal protein L20,[Source:TAIR;Acc:AT1G16740]	637	692	696	29.169	36.3627	33.8932	252	211	303	13.0325	11.7278	16.079
AT1G16750	AT1G16750	Protein of unknown function, DUF547,[Source:TAIR;Acc:AT1G16750]	91	83	93	4.167	4.3614	4.5288	154	147	182	7.9643	8.1706	9.658
AT1G16770	AT1G16770	unknown protein,[Source:TAIR;Acc:AT1G16770]	169	180	153	7.7387	9.4585	7.4507	218	216	297	11.2741	12.0057	15.7606
AT1G16790	AT1G16790	ribosomal protein-related,[Source:TAIR;Acc:AT1G16790]	203	138	147	9.2956	7.2515	7.1585	122	136	163	6.3094	7.5592	8.6497
AT1G16800	AT1G16800	P-loop containing nucleoside triphosphate hydrolases superfamily protein,[Source:TAIR;Acc:AT1G16800]	205	191	224	9.3872	10.0365	10.9081	145	145	180	7.4988	8.0594	9.5519
AT1G16810	AT1G16810	unknown protein,[Source:TAIR;Acc:AT1G16810]	788	827	744	36.0835	43.4566	36.2306	495	398	499	25.5995	22.1217	26.4799
AT1G16810	AT1G16810	unknown protein,[Source:TAIR;Acc:AT1G16810]	30	23	23	1.3737	1.2086	1.12	44	33	41	2.2755	1.8342	2.1757
AT1G16825	AT1G16825	Reticulon family protein,[Source:TAIR;Acc:AT1G16825]	36	25	37	1.6485	1.3137	1.8018	44	50	40	2.2755	2.7791	2.1226
AT1G16830	AT1G16830	Pentatricopeptide repeat (PPR) superfamily protein,[Source:TAIR;Acc:AT1G16830]	97	76	55	4.4417	3.9936	2.6783	17	25	30	0.8792	1.3896	1.592
AT1G16840	AT1G16840	unknown protein,[Source:TAIR;Acc:AT1G16840]	337	232	305	15.4316	12.191	14.8526	497	400	468	25.703	22.2328	24.8348
AT1G16850	AT1G16850	unknown protein,[Source:TAIR;Acc:AT1G16850]	14	22	17	0.6411	1.156	0.8279	24	23	9	1.2412	1.2784	0.4776
AT1G16870	AT1G16870	mitochondrial 28S ribosomal protein S29-related,[Source:TAIR;Acc:AT1G16870]	610	526	633	27.9326	27.6399	30.8252	350	376	528	18.1007	20.8989	28.0188
AT1G16880	AT1G16880	uridylyltransferase-related,[Source:TAIR;Acc: AT1G16880]	657	736	688	30.0848	38.6748	33.5036	1225	1143	1115	63.3523	63.5304	59.1685
AT1G16880	AT1G16880	uridylyltransferase-related,[Source:TAIR;Acc: AT1G16880]	1447	1249	1366	66.2598	65.6316	66.5202	5889	5508	4874	304.5567	306.1463	258.6431
AT1G16900	AT1G16900	Alg9-like mannosyltransferase family,[Source:TAIR;Acc:AT1G16900]	189	212	249	8.6545	11.14	12.1256	205	186	233	10.6018	10.3383	12.3644
AT1G16916	AT1G16916	unknown protein,[Source:TAIR;Acc:AT1G16916]	171	106	134	7.8303	5.57	6.5254	58	52	66	2.9995	2.8903	3.5023
AT1G16920	RAB11	RAB GTPase homolog A1B,[Source:TAIR;Acc:AT1G16920]	392	390	316	17.9501	20.4935	15.3883	540	449	604	27.9267	24.9564	32.0518
AT1G16930	AT1G16930	F-box/RNI-like/FBD-like domains-containing protein,[Source:TAIR;Acc:AT1G16930]	38	46	36	1.7401	2.4172	1.7531	65	69	57	3.3616	3.8352	3.0248
AT1G16960	AT1G16960	Ubiquitin domain-containing protein,[Source:TAIR;Acc:AT1G16960]	35	27	26	1.6027	1.4188	1.2661	77	50	86	3.9821	2.7791	4.5637
AT1G16960	AT1G16960	Ubiquitin domain-containing protein,[Source:TAIR;Acc:AT1G16960]	123	127	99	5.6323	6.6735	4.821	153	128	157	7.9126	7.1145	8.3313
AT1G17020	SRG1	senescence-related gene 1,[Source:TAIR;Acc:AT1G17020]	121	191	199	5.5407	10.0365	9.6907	100	38	112	5.1716	2.1121	5.9434
AT1G17040	SHA	SH2 domain protein A,[Source:TAIR;Acc:AT1G17040]	71	66	73	3.2512	3.4681	3.5549	74	85	54	3.827	4.7245	2.8656
AT1G17050	SPS2	solanesyl diphosphate synthase 2,[Source:TAIR;Acc:AT1G17050]	1765	1530	1574	80.8214	80.3974	76.6492	1889	1992	1256	97.6919	110.7196	66.6507
AT1G17060	CYP72C1	cytochrome p450 72c1,[Source:TAIR;Acc:AT1G17060]	81	103	72	3.7091	5.4124	3.5062	231	181	145	11.9464	10.0604	7.6946
AT1G17070	AT1G17070	GC-rich sequence DNA-binding factor-like protein with Tuftelin interacting domain,[Source:TAIR;Acc:AT1G17070]	457	430	448	20.9266	22.5953	21.8163	260	215	315	13.4462	11.9502	16.7158
AT1G17070	AT1G17070	GC-rich sequence DNA-binding factor-like protein with Tuftelin interacting domain,[Source:TAIR;Acc:AT1G17070]	258	291	268	11.8141	15.2913	13.0508	389	387	345	20.1176	21.5103	18.3077
AT1G17090	AT1G17090	unknown protein,[Source:TAIR;Acc:AT1G17090]	55	71	44	2.5185	3.7309	2.1427	45	51	30	2.3272	2.8347	1.592
AT1G17100	AT1G17100	SOUL heme-binding family protein,[Source:TAIR;Acc:AT1G17100]	511	529	479	23.3993	27.7975	23.3259	633	524	666	32.7364	29.125	35.3419
AT1G17100	AT1G17100	SOUL heme-binding family protein,[Source:TAIR;Acc:AT1G17100]	2221	1941	2098	101.702	101.994	102.166	1320	1459	1232	68.2654	81.0943	65.3772
AT1G17120	CAT8	cationic amino acid transporter 8,[Source:TAIR;Acc:AT1G17120]	330	313	347	15.1111	16.4473	16.8979	460	430	412	23.7895	23.9003	21.8631
AT1G17130	AT1G17130	Family of unknown function (DUF572),[Source:TAIR;Acc:AT1G17130]	453	414	366	20.7434	21.7546	17.8231	315	294	395	16.2906	16.3411	20.961
AT1G17130	AT1G17130	Family of unknown function (DUF572),[Source:TAIR;Acc:AT1G17130]	582	522	422	26.6505	27.4297	20.5502	393	365	403	20.3245	20.2875	21.3856
AT1G17145	AT1G17145	RING/U-box superfamily protein,[Source:TAIR;Acc:AT1G17145]	97	79	71	4.4417	4.1512	3.4575	111	129	185	5.7405	7.1701	9.8172
AT1G17160	AT1G17160	pfkB-like carbohydrate kinase family protein,[Source:TAIR;Acc:AT1G17160]	357	343	339	16.3475	18.0237	16.5083	288	243	366	14.8943	13.5065	19.4221
AT1G17170	ATGSTU24	glutathione S-transferase TAU 24,[Source:TAIR;Acc:AT1G17170]	2500	3171	1704	114.478	166.628	82.9798	346	429	453	17.8938	23.8447	24.0388
AT1G17180	ATGSTU25	glutathione S-transferase TAU 25,[Source:TAIR;Acc:AT1G17180]	686	1069	835	31.4128	56.1731	40.6621	67	93	125	3.465	5.1691	6.6332
AT1G17190	ATGSTU26	glutathione S-transferase tau 26,[Source:TAIR;Acc:AT1G17190]	133	152	96	6.0902	7.9872	4.6749	189	147	127	9.7744	8.1706	6.7394
AT1G17200	AT1G17200	Uncharacterised protein family (UPF0497),[Source:TAIR;Acc:AT1G17200]	364	233	276	16.668	12.2435	13.4404	778	570	768	40.2352	31.6818	40.7546
AT1G17210	ATILP1	IAP-like protein 1,[Source:TAIR;Acc:AT1G17210]	1845	1644	1676	84.4847	86.3878	81.6163	1617	1293	1453	83.6251	71.8677	77.1047
AT1G17220	FUG1	Translation initiation factor 2, small GTP-binding protein,[Source:TAIR;Acc:AT1G17220]	6085	5555	5549	278.639	291.9	270.22	9538	9498	8628	493.2691	527.9189	457.8524
AT1G17230	AT1G17230	Leucine-rich receptor-like protein kinase family protein,[Source:TAIR;Acc:AT1G17230]	75	71	83	3.4343	3.7309	4.0419	81	62	86	4.189	3.4461	4.5637
AT1G17230	AT1G17230	Leucine-rich receptor-like protein kinase family protein,[Source:TAIR;Acc:AT1G17230]	223	183	254	10.2114	9.6162	12.3691	207	147	205	10.7053	8.1706	10.8785
AT1G17270	AT1G17270	O-fucosyltransferase family protein,[Source:TAIR;Acc:AT1G17270]	70	76	54	3.2054	3.9936	2.6296	88	85	60	4.551	4.7245	3.184
AT1G17280	UBC34	ubiquitin-conjugating enzyme 34,[Source:TAIR;Acc:AT1G17280]	191	186	171	8.7461	9.7738	8.3272	385	305	364	19.9107	16.9525	19.316
AT1G17290	AlaAT1	alanine aminotransferas,[Source:TAIR;Acc:AT1G17290]	1628	2437	2188	74.548	128.058	106.549	1588	1334	2199	82.1253	74.1465	116.6919
AT1G17330	AT1G17330	Metal-dependent phosphohydrolase,[Source:TAIR;Acc:AT1G17330]	181	141	126	8.2882	7.4092	6.1358	111	100	91	5.7405	5.5582	4.829
AT1G17340	AT1G17340	Phosphoinositide phosphatase family protein,[Source:TAIR;Acc:AT1G17340]	209	176	170	9.5704	9.2483	8.2785	483	440	392	24.9789	24.4561	20.8018
AT1G17350	AT1G17350	NADH:ubiquinone oxidoreductase intermediate-associated protein 30,[Source:TAIR;Acc:AT1G17350]	61	58	52	2.7933	3.0477	2.5323	75	65	96	3.8787	3.6128	5.0943
AT1G17360	AT1G17360	No description	829	1098	1295	37.9609	57.697	63.0627	1290	980	1213	66.7139	54.4705	64.3689
AT1G17370	UBP1B	oligouridylate binding protein 1B,[Source:TAIR;Acc:AT1G17370]	545	535	499	24.9562	28.1128	24.2998	1019	984	851	52.6988	54.6928	45.1591
AT1G17380	JAZ5	jasmonate-zim-domain protein 5,[Source:TAIR;Acc:AT1G17380]	18	15	22	0.8242	0.7882	1.0713	4	8	26	0.2069	0.4447	1.3797
AT1G17410	AT1G17410	Nucleoside diphosphate kinase family protein,[Source:TAIR;Acc:AT1G17410]	41	29	36	1.8774	1.5239	1.7531	58	48	61	2.9995	2.6679	3.237
AT1G17420	LOX3	lipoxygenase 3,[Source:TAIR;Acc:AT1G17420]	78	61	138	3.5717	3.2054	6.7202	50	37	79	2.5858	2.0565	4.1922
AT1G17430	AT1G17430	alpha/beta-Hydrolases superfamily protein,[Source:TAIR;Acc:AT1G17430]	521	485	483	23.8572	25.4854	23.5207	621	583	569	32.1158	32.4044	30.1945
AT1G17430	AT1G17430	alpha/beta-Hydrolases superfamily protein,[Source:TAIR;Acc:AT1G17430]	74	35	39	3.3886	1.8392	1.8992	63	53	52	3.2581	2.9459	2.7594
AT1G17450	AT1G17450	B-block binding subunit of TFIIIC,[Source:TAIR;Acc:AT1G17450]	343	326	345	15.7064	17.1304	16.8005	287	241	296	14.8426	13.3953	15.7075
AT1G17455	ELF4-L4	ELF4-like 4,[Source:TAIR;Acc:AT1G17455]	40	44	28	1.8317	2.3121	1.3635	44	29	66	2.2755	1.6119	3.5023
AT1G17460	TRFL3	TRF-like 3,[Source:TAIR;Acc:AT1G17460]	36	31	70	1.6485	1.629	3.4088	28	26	65	1.4481	1.4451	3.4493
AT1G17470	ATDRG1	developmentally regulated G-protein 1,[Source:TAIR;Acc:AT1G17470]	735	729	757	33.6565	38.307	36.8637	1058	955	1380	54.7157	53.0809	73.2309
AT1G17480	IQD7	IQ-domain 7,[Source:TAIR;Acc:AT1G17480]	52	41	44	2.3811	2.1544	2.1427	26	21	32	1.3446	1.1672	1.6981
AT1G17490	AT1G17490	unknown protein,[Source:TAIR;Acc:AT1G17490]	154	170	173	7.0518	8.933	8.4246	96	77	104	4.9648	4.2798	5.5189
AT1G17500	AT1G17500	ATPase E1-E2 type family protein / haloacid dehalogenase-like hydrolase family protein,[Source:TAIR;Acc:AT1G17500]	324	392	341	14.8363	20.5985	16.6057	377	387	331	19.497	21.5103	17.5648
AT1G17510	AT1G17510	unknown protein,[Source:TAIR;Acc:AT1G17510]	116	137	129	5.3118	7.199	6.2819	58	51	71	2.9995	2.8347	3.7677
AT1G17520	AT1G17520	Homeodomain-like/winged-helix DNA-binding family protein,[Source:TAIR;Acc:AT1G17520]	204	173	160	9.3414	9.0907	7.7915	156	163	193	8.0677	9.0599	10.2417
AT1G17530	ATTIM23-1	translocase of inner mitochondrial membrane 23,[Source:TAIR;Acc:AT1G17530]	679	513	667	31.0922	26.9568	32.4809	396	310	453	20.4796	17.2305	24.0388
AT1G17550	HAB2	homology to ABI2,[Source:TAIR;Acc:AT1G17550]	599	542	571	27.4289	28.4806	27.806	558	495	530	28.8576	27.5131	28.1249
AT1G17560	HLL	Ribosomal protein L14p/L23e family protein,[Source:TAIR;Acc:AT1G17560]	101	99	119	4.6249	5.2022	5.795	68	50	96	3.5167	2.7791	5.0943
AT1G17580	MYA1	myosin 1,[Source:TAIR;Acc:AT1G17580]	384	321	356	17.5838	16.8677	17.3362	601	552	591	31.0814	30.6813	31.3619
AT1G17590	NF-YA8	nuclear factor Y, subunit A8,[Source:TAIR;Acc:AT1G17590]	42	43	30	1.9232	2.2595	1.4609	37	32	42	1.9135	1.7786	2.2288
AT1G17600	AT1G17600	Disease resistance protein (TIR-NBS-LRR class) family,[Source:TAIR;Acc:AT1G17600]	50	34	36	2.2896	1.7866	1.7531	20	26	18	1.0343	1.4451	0.9552
AT1G17620	AT1G17620	Late embryogenesis abundant (LEA) hydroxyproline-rich glycoprotein family,[Source:TAIR;Acc:AT1G17620]	430	341	414	19.6902	17.9186	20.1606	853	834	726	44.1139	46.3555	38.5258
AT1G17630	AT1G17630	Pentatricopeptide repeat (PPR-like) superfamily protein,[Source:TAIR;Acc:AT1G17630]	61	65	46	2.7933	3.4156	2.2401	15	19	28	0.7757	1.0561	1.4858
AT1G17640	AT1G17640	RNA-binding (RRM/RBD/RNP motifs) family protein,[Source:TAIR;Acc:AT1G17640]	41	30	20	1.8774	1.5764	0.9739	77	76	50	3.9821	4.2242	2.6533
AT1G17650	GLYR2	glyoxylate reductase 2,[Source:TAIR;Acc:AT1G17650]	145	156	134	6.6397	8.1974	6.5254	562	510	565	29.0645	28.3469	29.9822
AT1G17680	AT1G17680	tetratricopeptide repeat (TPR)-containing protein,[Source:TAIR;Acc:AT1G17680]	290	266	299	13.2794	13.9776	14.5604	297	294	350	15.3597	16.3411	18.5731
AT1G17690	AT1G17690	NOF1,[Source:TAIR;Acc:AT1G17690]	267	281	266	12.2262	14.7658	12.9534	267	229	348	13.8082	12.7283	18.4669
AT1G17700	PRA1,F1	prenylated RAB acceptor 1,F1,[Source:TAIR;Acc:AT1G17700]	80	34	35	3.6633	1.7866	1.7044	33	41	8	1.7066	2.2789	0.4245
AT1G17720	ATB BETA	Protein phosphatase 2A, regulatory subunit PR55,[Source:TAIR;Acc:AT1G17720]	730	719	745	33.4276	37.7815	36.2793	807	665	926	41.735	36.9621	49.139
AT1G17730	VPS46,1	vacuolar protein sorting 46,1,[Source:TAIR;Acc:AT1G17730]	246	295	273	11.2646	15.5015	13.2943	361	321	364	18.6695	17.8419	19.316
AT1G17744	AT1G17744	unknown protein,[Source:TAIR;Acc:AT1G17744]	627	737	464	28.7111	38.7274	22.5954	165	223	108	8.5332	12.3948	5.7311
AT1G17744	AT1G17744	unknown protein,[Source:TAIR;Acc:AT1G17744]	1975	2787	1487	90.4376	146.449	72.4126	559	713	354	28.9094	39.63	18.7853
AT1G17750	PEPR2	PEP1 receptor 2,[Source:TAIR;Acc:AT1G17750]	147	159	152	6.7313	8.355	7.402	272	238	250	14.0668	13.2285	13.2665
AT1G17750	PEPR2	PEP1 receptor 2,[Source:TAIR;Acc:AT1G17750]	54	71	53	2.4727	3.7309	2.581	38	21	25	1.9652	1.1672	1.3266
AT1G17780	AT1G17780	unknown protein,[Source:TAIR;Acc:AT1G17780]	154	144	179	7.0518	7.5668	8.7168	197	118	167	10.1881	6.5587	8.862
AT1G17790	AT1G17790	DNA-binding bromodomain-containing protein,[Source:TAIR;Acc:AT1G17790]	89	85	89	4.0754	4.4665	4.334	111	90	98	5.7405	5.0024	5.2005
AT1G17810	BETA-TIP	beta-tonoplast intrinsic protein,[Source:TAIR;Acc:AT1G17810]	250	259	274	11.4478	13.6098	13.343	248	255	216	12.8256	14.1734	11.4622
AT1G17830	AT1G17830	Protein of unknown function (DUF789),[Source:TAIR;Acc:AT1G17830]	91	107	187	4.167	5.6226	9.1064	78	61	130	4.0339	3.3905	6.8986
AT1G17840	WBC11	white-brown complex homolog protein 11,[Source:TAIR;Acc:AT1G17840]	335	330	315	15.34	17.3406	15.3396	384	410	467	19.859	22.7887	24.7818
AT1G17840	WBC11	white-brown complex homolog protein 11,[Source:TAIR;Acc:AT1G17840]	1432	1359	1662	65.573	71.4118	80.9345	2103	1679	2351	108.7592	93.3224	124.7579
AT1G17860	AT1G17860	Kunitz family trypsin and protease inhibitor protein,[Source:TAIR;Acc:AT1G17860]	183	243	206	8.3798	12.769	10.0316	459	393	311	23.7377	21.8438	16.5035
AT1G17860	AT1G17860	Kunitz family trypsin and protease inhibitor protein,[Source:TAIR;Acc:AT1G17860]	1876	1536	1490	85.9043	80.7127	72.5586	2338	2007	1459	120.9125	111.5533	77.4231
AT1G17880	BTF3	basic transcription factor 3,[Source:TAIR;Acc:AT1G17880]	1888	2100	1781	86.4538	110.349	86.7295	2025	1989	2496	104.7253	110.5528	132.4524
AT1G17890	GER2	NAD(P)-binding Rossmann-fold superfamily protein,[Source:TAIR;Acc:AT1G17890]	483	546	523	22.1171	28.6908	25.4686	410	411	425	21.2036	22.8442	22.553
AT1G17920	HDG12	homeodomain GLABROUS 12,[Source:TAIR;Acc:AT1G17920]	31	45	17	1.4195	2.3646	0.8279	40	27	28	2.0686	1.5007	1.4858
AT1G17930	AT1G17930	Aminotransferase-like, plant mobile domain family protein,[Source:TAIR;Acc:AT1G17930]	116	125	136	5.3118	6.5684	6.6228	108	105	98	5.5853	5.8361	5.2005
AT1G17940	AT1G17940	Endosomal targeting BRO1-like domain-containing protein,[Source:TAIR;Acc:AT1G17940]	43	40	38	1.969	2.1019	1.8505	88	72	67	4.551	4.0019	3.5554
AT1G17960	AT1G17960	Threonyl-tRNA synthetase,[Source:TAIR;Acc:AT1G17960]	317	205	259	14.5158	10.7722	12.6125	193	76	449	9.9812	4.2242	23.8266
AT1G17970	AT1G17970	RING/U-box superfamily protein,[Source:TAIR;Acc:AT1G17970]	133	106	111	6.0902	5.57	5.4054	199	194	224	10.2915	10.7829	11.8868
AT1G17980	PAPS1	poly(A) polymerase 1,[Source:TAIR;Acc:AT1G17980]	350	297	329	16.0269	15.6066	16.0213	445	364	517	23.0137	20.2319	27.4351
AT1G17990	AT1G17990	FMN-linked oxidoreductases superfamily protein,[Source:TAIR;Acc:AT1G17990]	195	155	173	8.9293	8.1448	8.4246	514	432	513	26.5821	24.0115	27.2228
AT1G18000	AT1G18000	Major facilitator superfamily protein,[Source:TAIR;Acc:AT1G18000]	255	176	341	11.6768	9.2483	16.6057	445	330	370	23.0137	18.3421	19.6344
AT1G18010	AT1G18010	Major facilitator superfamily protein,[Source:TAIR;Acc:AT1G18010]	237	183	338	10.8525	9.6162	16.4596	393	369	311	20.3245	20.5098	16.5035
AT1G18020	AT1G18020	FMN-linked oxidoreductases superfamily protein,[Source:TAIR;Acc:AT1G18020]	234	138	216	10.7151	7.2515	10.5186	518	372	501	26.789	20.6765	26.586
AT1G18030	AT1G18030	Protein phosphatase 2C family protein,[Source:TAIR;Acc:AT1G18030]	108	108	117	4.9455	5.6751	5.6976	107	115	122	5.5336	6.3919	6.474
AT1G18030	AT1G18030	Protein phosphatase 2C family protein,[Source:TAIR;Acc:AT1G18030]	68	70	81	3.1138	3.6783	3.9445	108	101	113	5.5853	5.6138	5.9964
AT1G18060	AT1G18060	unknown protein,[Source:TAIR;Acc:AT1G18060]	1105	928	1007	50.5993	48.7639	49.038	1772	1602	1499	91.6411	89.0425	79.5458
AT1G18070	AT1G18070	Translation elongation factor EF1A/initiation factor IF2gamma family protein,[Source:TAIR;Acc:AT1G18070]	1000	1017	976	45.7912	53.4406	47.5283	1731	1506	1918	89.5207	83.7067	101.7804
AT1G18080	ATARCA	Transducin/WD40 repeat-like superfamily protein,[Source:TAIR;Acc:AT1G18080]	9271	8675	8207	424.53	455.848	399.657	8116	7624	8868	419.7287	423.758	470.5882
AT1G18090	AT1G18090	5'-3' exonuclease family protein,[Source:TAIR;Acc:AT1G18090]	127	142	116	5.8155	7.4617	5.6489	136	120	143	7.0334	6.6699	7.5884
AT1G18090	AT1G18090	5'-3' exonuclease family protein,[Source:TAIR;Acc:AT1G18090]	86	98	82	3.938	5.1496	3.9932	96	89	78	4.9648	4.9468	4.1391
AT1G18140	LAC1	laccase 1,[Source:TAIR;Acc:AT1G18140]	38	46	14	1.7401	2.4172	0.6818	12	22	6	0.6206	1.2228	0.3184
AT1G18150	ATMPK8	Protein kinase superfamily protein,[Source:TAIR;Acc:AT1G18150]	327	335	383	14.9737	17.6034	18.651	401	353	362	20.7382	19.6205	19.2098
AT1G18160	AT1G18160	Protein kinase superfamily protein,[Source:TAIR;Acc:AT1G18160]	596	486	524	27.2915	25.538	25.5173	637	597	698	32.9432	33.1825	37.04
AT1G18170	AT1G18170	FKBP-like peptidyl-prolyl cis-trans isomerase family protein,[Source:TAIR;Acc:AT1G18170]	385	393	401	17.6296	20.6511	19.5275	636	589	580	32.8915	32.7379	30.7782
AT1G18180	AT1G18180	Protein of unknown function (DUF1295),[Source:TAIR;Acc:AT1G18180]	25	20	34	1.1448	1.051	1.6557	30	21	47	1.5515	1.1672	2.4941
AT1G18180	AT1G18180	Protein of unknown function (DUF1295),[Source:TAIR;Acc:AT1G18180]	196	201	189	8.9751	10.562	9.2038	230	192	280	11.8947	10.6718	14.8584
AT1G18200	AtRABA6b	RAB GTPase homolog A6B,[Source:TAIR;Acc:AT1G18200]	31	34	30	1.4195	1.7866	1.4609	41	32	52	2.1204	1.7786	2.7594
AT1G18200	AtRABA6b	RAB GTPase homolog A6B,[Source:TAIR;Acc:AT1G18200]	1007	837	743	46.1117	43.9821	36.1819	604	501	716	31.2366	27.8466	37.9952
AT1G18250	ATLP-1	Pathogenesis-related thaumatin superfamily protein,[Source:TAIR;Acc:AT1G18250]	321	235	207	14.699	12.3486	10.0803	163	218	128	8.4297	12.1169	6.7924
AT1G18260	AT1G18260	HCP-like superfamily protein,[Source:TAIR;Acc:AT1G18260]	983	798	897	45.0127	41.9328	43.6813	762	569	810	39.4077	31.6262	42.9834
AT1G18265	AT1G18265	Protein of unknown function, DUF593,[Source:TAIR;Acc:AT1G18265]	27	25	51	1.2364	1.3137	2.4836	12	16	18	0.6206	0.8893	0.9552
AT1G18270	AT1G18270	ketose-bisphosphate aldolase class-II family protein,[Source:TAIR;Acc:AT1G18270]	435	369	416	19.9192	19.39	20.258	1191	863	1279	61.594	47.9674	67.8713
AT1G18300	atnudt4	nudix hydrolase homolog 4,[Source:TAIR;Acc:AT1G18300]	89	87	80	4.0754	4.5716	3.8958	71	62	79	3.6719	3.4461	4.1922
AT1G18320	AT1G18320	Mitochondrial import inner membrane translocase subunit Tim17/Tim22/Tim23 family protein,[Source:TAIR;Acc:AT1G18320]	34	30	45	1.5569	1.5764	2.1914	25	23	27	1.2929	1.2784	1.4328
AT1G18330	EPR1	Homeodomain-like superfamily protein,[Source:TAIR;Acc:AT1G18330]	258	228	258	11.8141	11.9808	12.5638	363	183	483	18.773	10.1715	25.6308
AT1G18335	AT1G18335	Acyl-CoA N-acyltransferases (NAT) superfamily protein,[Source:TAIR;Acc:AT1G18335]	49	45	45	2.2438	2.3646	2.1914	83	60	80	4.2924	3.3349	4.2453
AT1G18340	AT1G18340	basal transcription factor complex subunit-related,[Source:TAIR;Acc:AT1G18340]	55	59	48	2.5185	3.1003	2.3375	101	95	158	5.2233	5.2803	8.3844
AT1G18350	ATMKK7	MAP kinase kinase 7,[Source:TAIR;Acc:AT1G18350]	85	111	130	3.8923	5.8328	6.3306	99	83	113	5.1199	4.6133	5.9964
AT1G18370	HIK	ATP binding microtubule motor family protein,[Source:TAIR;Acc:AT1G18370]	254	228	171	11.631	11.9808	8.3272	103	187	95	5.3268	10.3939	5.0413
AT1G18390	AT1G18390	Protein kinase superfamily protein,[Source:TAIR;Acc:AT1G18390]	124	89	114	5.6781	4.6767	5.5515	188	133	129	9.7226	7.3924	6.8455
AT1G18400	BEE1	BR enhanced expression 1,[Source:TAIR;Acc:AT1G18400]	182	180	154	8.334	9.4585	7.4994	133	125	184	6.8783	6.9478	9.7641
AT1G18415	AT1G18415	other RNA,[Source:TAIR;Acc:AT1G18415]	106	100	82	4.8539	5.2547	3.9932	131	135	148	6.7748	7.5036	7.8538
AT1G18415	AT1G18415	other RNA,[Source:TAIR;Acc:AT1G18415]	110	101	88	5.037	5.3073	4.2853	141	139	156	7.292	7.7259	8.2783
AT1G18440	AT1G18440	Peptidyl-tRNA hydrolase family protein,[Source:TAIR;Acc:AT1G18440]	60	64	69	2.7475	3.363	3.3601	163	171	205	8.4297	9.5045	10.8785
AT1G18450	ATARP4	actin-related protein 4,[Source:TAIR;Acc:AT1G18450]	148	109	109	6.7771	5.7277	5.308	351	316	380	18.1524	17.5639	20.165
AT1G18460	AT1G18460	alpha/beta-Hydrolases superfamily protein,[Source:TAIR;Acc:AT1G18460]	1101	989	1187	50.4161	51.9693	57.8034	1888	1646	1231	97.6402	91.4882	65.3241
AT1G18470	AT1G18470	Transmembrane Fragile-X-F-associated protein,[Source:TAIR;Acc:AT1G18470]	108	116	145	4.9455	6.0955	7.0611	293	239	338	15.1528	13.2841	17.9363
AT1G18480	AT1G18480	Calcineurin-like metallo-phosphoesterase superfamily protein,[Source:TAIR;Acc:AT1G18480]	616	598	588	28.2074	31.4233	28.6339	220	162	269	11.3776	9.0043	14.2747
AT1G18485	AT1G18485	Pentatricopeptide repeat (PPR) superfamily protein,[Source:TAIR;Acc:AT1G18485]	294	236	253	13.4626	12.4012	12.3204	261	249	273	13.4979	13.8399	14.487
AT1G18486	AT1G18486	unknown protein,[Source:TAIR;Acc:AT1G18486]	69	82	72	3.1596	4.3089	3.5062	174	158	161	8.9986	8.782	8.5436
AT1G18500	MAML-4	methylthioalkylmalate synthase-like 4,[Source:TAIR;Acc:AT1G18500]	1563	1409	1471	71.5716	74.0392	71.6334	1021	1051	1281	52.8022	58.4168	67.9774
AT1G18540	AT1G18540	Ribosomal protein L6 family protein,[Source:TAIR;Acc:AT1G18540]	4588	4616	4671	210.09	242.558	227.464	3366	3373	4305	174.0767	187.4785	228.4486
AT1G18550	AT1G18550	ATP binding microtubule motor family protein,[Source:TAIR;Acc:AT1G18550]	82	74	87	3.7549	3.8885	4.2367	58	52	57	2.9995	2.8903	3.0248
AT1G18560	AT1G18560	BED zinc finger ;hAT family dimerisation domain,[Source:TAIR;Acc:AT1G18560]	73	73	105	3.3428	3.836	5.1132	98	78	100	5.0682	4.3354	5.3066
AT1G18570	MYB51	myb domain protein 51,[Source:TAIR;Acc:AT1G18570]	61	64	101	2.7933	3.363	4.9184	70	63	71	3.6201	3.5017	3.7677
AT1G18580	GAUT11	galacturonosyltransferase 11,[Source:TAIR;Acc:AT1G18580]	252	279	258	11.5394	14.6607	12.5638	286	254	334	14.7908	14.1179	17.724
AT1G18590	SOT17	sulfotransferase 17,[Source:TAIR;Acc:AT1G18590]	446	527	350	20.4229	27.6924	17.044	163	237	123	8.4297	13.173	6.5271
AT1G18600	ATRBL12	RHOMBOID-like protein 12,[Source:TAIR;Acc:AT1G18600]	115	114	107	5.266	5.9904	5.2106	177	156	214	9.1538	8.6708	11.3561
AT1G18610	AT1G18610	Galactose oxidase/kelch repeat superfamily protein,[Source:TAIR;Acc:AT1G18610]	227	165	192	10.3946	8.6703	9.3498	157	167	184	8.1194	9.2822	9.7641
AT1G18620	AT1G18620	unknown protein,[Source:TAIR;Acc:AT1G18620]	549	559	525	25.1394	29.3739	25.566	1940	1703	1740	100.3294	94.6563	92.3346
AT1G18630	GR-RBP6	glycine-rich RNA-binding protein 6,[Source:TAIR;Acc:AT1G18630]	277	173	249	12.6842	9.0907	12.1256	95	91	145	4.913	5.058	7.6946
AT1G18630	GR-RBP6	glycine-rich RNA-binding protein 6,[Source:TAIR;Acc:AT1G18630]	323	287	290	14.7906	15.0811	14.1222	261	261	328	13.4979	14.5069	17.4056
AT1G18650	PDCB3	plasmodesmata callose-binding protein 3,[Source:TAIR;Acc:AT1G18650]	251	205	133	11.4936	10.7722	6.4767	499	460	417	25.8064	25.5678	22.1285
AT1G18660	AT1G18660	zinc finger (C3HC4-type RING finger) family protein,[Source:TAIR;Acc:AT1G18660]	414	392	414	18.9575	20.5985	20.1606	742	664	703	38.3734	36.9065	37.3053
AT1G18670	IBS1	Protein kinase superfamily protein,[Source:TAIR;Acc:AT1G18670]	136	130	232	6.2276	6.8312	11.2977	196	157	218	10.1364	8.7264	11.5684
AT1G18680	AT1G18680	HNH endonuclease domain-containing protein,[Source:TAIR;Acc:AT1G18680]	78	82	82	3.5717	4.3089	3.9932	113	98	128	5.8439	5.447	6.7924
AT1G18690	AT1G18690	Galactosyl transferase GMA12/MNN10 family protein,[Source:TAIR;Acc:AT1G18690]	140	120	111	6.4108	6.3057	5.4054	109	98	153	5.6371	5.447	8.1191
AT1G18700	AT1G18700	DNAJ heat shock N-terminal domain-containing protein,[Source:TAIR;Acc:AT1G18700]	191	142	183	8.7461	7.4617	8.9116	294	301	388	15.2046	16.7302	20.5896
AT1G18710	AtMYB47	myb domain protein 47,[Source:TAIR;Acc:AT1G18710]	48	21	69	2.198	1.1035	3.3601	15	16	8	0.7757	0.8893	0.4245
AT1G18720	AT1G18720	Protein of unknown function (DUF962),[Source:TAIR;Acc:AT1G18720]	483	442	491	22.1171	23.2259	23.9103	890	809	897	46.0274	44.9659	47.6001
AT1G18730	NDF6	NDH dependent flow 6,[Source:TAIR;Acc:AT1G18730]	18	23	15	0.8242	1.2086	0.7305	89	71	68	4.6027	3.9463	3.6085
AT1G18730	NDF6	NDH dependent flow 6,[Source:TAIR;Acc:AT1G18730]	318	334	312	14.5616	17.5508	15.1935	983	906	680	50.837	50.3574	36.0848
AT1G18740	AT1G18740	Protein of unknown function (DUF793),[Source:TAIR;Acc:AT1G18740]	177	158	163	8.105	8.3025	7.9376	398	345	308	20.583	19.1758	16.3443
AT1G18745	AT1G18745	No description	76	59	57	3.4801	3.1003	2.7757	40	28	55	2.0686	1.5563	2.9186
AT1G18750	AGL65	AGAMOUS-like 65,[Source:TAIR;Acc:AT1G18750]	61	53	49	2.7933	2.785	2.3862	77	51	51	3.9821	2.8347	2.7064
AT1G18773	AT1G18773	No description	38	29	22	1.7401	1.5239	1.0713	63	56	38	3.2581	3.1126	2.0165
AT1G18800	NRP2	NAP1-related protein 2,[Source:TAIR;Acc:AT1G18800]	327	371	354	14.9737	19.4951	17.2388	254	230	287	13.1359	12.7839	15.2299
AT1G18810	AT1G18810	phytochrome kinase substrate-related,[Source:TAIR;Acc:AT1G18810]	377	245	369	17.2633	12.8741	17.9692	252	252	184	13.0325	14.0067	9.7641
AT1G18840	IQD30	IQ-domain 30,[Source:TAIR;Acc:AT1G18840]	295	331	238	13.5084	17.3932	11.5899	284	315	312	14.6874	17.5084	16.5566
AT1G18850	AT1G18850	unknown protein,[Source:TAIR;Acc:AT1G18850]	516	456	451	23.6283	23.9616	21.9624	146	133	173	7.5506	7.3924	9.1804
AT1G18860	WRKY61	WRKY DNA-binding protein 61,[Source:TAIR;Acc:AT1G18860]	72	43	71	3.297	2.2595	3.4575	96	63	50	4.9648	3.5017	2.6533
AT1G18880	AT1G18880	Major facilitator superfamily protein,[Source:TAIR;Acc:AT1G18880]	568	514	537	26.0094	27.0093	26.1503	711	613	737	36.7702	34.0718	39.1096
AT1G18880	AT1G18880	Major facilitator superfamily protein,[Source:TAIR;Acc:AT1G18880]	457	437	286	20.9266	22.9632	13.9274	538	568	272	27.8233	31.5706	14.4339
AT1G18900	AT1G18900	Pentatricopeptide repeat (PPR) superfamily protein,[Source:TAIR;Acc:AT1G18900]	915	861	964	41.8989	45.2432	46.944	391	300	418	20.221	16.6746	22.1815
AT1G18900	AT1G18900	Pentatricopeptide repeat (PPR) superfamily protein,[Source:TAIR;Acc:AT1G18900]	225	222	209	10.303	11.6655	10.1777	257	298	234	13.2911	16.5635	12.4174
AT1G18940	AT1G18940	Nodulin-like / Major Facilitator Superfamily protein,[Source:TAIR;Acc:AT1G18940]	18	20	16	0.8242	1.051	0.7792	22	29	19	1.1378	1.6119	1.0083
AT1G18950	AT1G18950	DDT domain superfamily,[Source:TAIR;Acc:AT1G18950]	730	518	655	33.4276	27.2195	31.8966	419	344	394	21.6691	19.1202	20.908
AT1G18970	GLP4	germin-like protein 4,[Source:TAIR;Acc:AT1G18970]	22	17	16	1.0074	0.8933	0.7792	39	39	16	2.0169	2.1677	0.8491
AT1G18980	AT1G18980	RmlC-like cupins superfamily protein,[Source:TAIR;Acc:AT1G18980]	156	130	127	7.1434	6.8312	6.1845	231	223	189	11.9464	12.3948	10.0295
AT1G19000	AT1G19000	Homeodomain-like superfamily protein,[Source:TAIR;Acc:AT1G19000]	2387	2119	2816	109.304	111.348	137.131	4404	4068	3291	227.7582	226.108	174.6398
AT1G19010	AT1G19010	unknown protein,[Source:TAIR;Acc:AT1G19010]	129	130	114	5.9071	6.8312	5.5515	117	99	93	6.0508	5.5026	4.9351
AT1G19020	AT1G19020	unknown protein,[Source:TAIR;Acc:AT1G19020]	62	73	68	2.8391	3.836	3.3114	103	72	152	5.3268	4.0019	8.066
AT1G19025	AT1G19025	DNA repair metallo-beta-lactamase family protein,[Source:TAIR;Acc:AT1G19025]	27	34	37	1.2364	1.7866	1.8018	50	30	52	2.5858	1.6675	2.7594
AT1G19050	ARR7	response regulator 7,[Source:TAIR;Acc:AT1G19050]	112	55	78	5.1286	2.8901	3.7984	194	235	154	10.0329	13.0618	8.1721
AT1G19080	TTN10	GINS complex protein,[Source:TAIR;Acc:AT1G19080]	36	52	49	1.6485	2.7325	2.3862	130	130	162	6.7231	7.2257	8.5967
AT1G19100	AT1G19100	Histidine kinase-, DNA gyrase B-, and HSP90-like ATPase family protein,[Source:TAIR;Acc:AT1G19100]	147	102	147	6.7313	5.3598	7.1585	143	117	162	7.3954	6.5031	8.5967
AT1G19110	AT1G19110	inter-alpha-trypsin inhibitor heavy chain-related,[Source:TAIR;Acc:AT1G19110]	559	521	532	25.5973	27.3772	25.9068	942	856	787	48.7167	47.5783	41.7628
AT1G19120	AT1G19120	Small nuclear ribonucleoprotein family protein,[Source:TAIR;Acc:AT1G19120]	474	437	452	21.705	22.9632	22.0111	292	306	457	15.1011	17.0081	24.2511
AT1G19120	AT1G19120	Small nuclear ribonucleoprotein family protein,[Source:TAIR;Acc:AT1G19120]	139	153	123	6.365	8.0397	5.9897	197	166	197	10.1881	9.2266	10.454
AT1G19140	AT1G19140	No description	515	445	508	23.5825	23.3836	24.7381	713	640	760	36.8737	35.5726	40.3301
AT1G19180	TIFY10A	jasmonate-zim-domain protein 1,[Source:TAIR;Acc:AT1G19180]	113	130	153	5.1744	6.8312	7.4507	135	143	204	6.9817	7.9482	10.8254
AT1G19200	AT1G19200	Protein of unknown function (DUF581),[Source:TAIR;Acc:AT1G19200]	35	30	40	1.6027	1.5764	1.9479	26	27	23	1.3446	1.5007	1.2205
AT1G19220	ARF19	auxin response factor 19,[Source:TAIR;Acc:AT1G19220]	247	217	196	11.3104	11.4028	9.5446	281	254	353	14.5323	14.1179	18.7323
AT1G19230	AT1G19230	Riboflavin synthase-like superfamily protein,[Source:TAIR;Acc:AT1G19230]	96	76	83	4.396	3.9936	4.0419	73	73	87	3.7753	4.0575	4.6167
AT1G19230	AT1G19230	Riboflavin synthase-like superfamily protein,[Source:TAIR;Acc:AT1G19230]	88	94	93	4.0296	4.9395	4.5288	142	145	67	7.3437	8.0594	3.5554
AT1G19270	DA1	DA1,[Source:TAIR;Acc:AT1G19270]	62	68	76	2.8391	3.5732	3.701	117	89	103	6.0508	4.9468	5.4658
AT1G19290	AT1G19290	Pentatricopeptide repeat (PPR) superfamily protein,[Source:TAIR;Acc:AT1G19290]	123	182	173	5.6323	9.5636	8.4246	125	90	125	6.4645	5.0024	6.6332
AT1G19300	GATL1	Nucleotide-diphospho-sugar transferases superfamily protein,[Source:TAIR;Acc:AT1G19300]	141	104	99	6.4566	5.4649	4.821	160	157	154	8.2746	8.7264	8.1721
AT1G19310	AT1G19310	RING/U-box superfamily protein,[Source:TAIR;Acc:AT1G19310]	48	44	54	2.198	2.3121	2.6296	120	89	138	6.2059	4.9468	7.3231
AT1G19330	AT1G19330	unknown protein,[Source:TAIR;Acc:AT1G19330]	38	47	58	1.7401	2.4697	2.8244	125	84	76	6.4645	4.6689	4.033
AT1G19340	AT1G19340	Methyltransferase MT-A70 family protein,[Source:TAIR;Acc:AT1G19340]	30	23	37	1.3737	1.2086	1.8018	27	33	34	1.3963	1.8342	1.8042
AT1G19350	BES1	Brassinosteroid signalling positive regulator (BZR1) family protein,[Source:TAIR;Acc:AT1G19350]	1759	1784	2598	80.5467	93.7444	126.515	2100	2150	2380	108.604	119.5015	126.2968
AT1G19360	AT1G19360	Nucleotide-diphospho-sugar transferase family protein,[Source:TAIR;Acc:AT1G19360]	659	743	595	30.1764	39.0427	28.9748	454	419	462	23.4792	23.2889	24.5164
AT1G19370	AT1G19370	unknown protein,[Source:TAIR;Acc:AT1G19370]	130	146	133	5.9529	7.6719	6.4767	89	81	112	4.6027	4.5022	5.9434
AT1G19380	AT1G19380	Protein of unknown function (DUF1195),[Source:TAIR;Acc:AT1G19380]	43	30	84	1.969	1.5764	4.0906	162	62	262	8.378	3.4461	13.9033
AT1G19394	AT1G19394	unknown protein,[Source:TAIR;Acc:AT1G19394]	98	54	84	4.4875	2.8376	4.0906	172	98	242	8.8952	5.447	12.8419
AT1G19394	AT1G19394	unknown protein,[Source:TAIR;Acc:AT1G19394]	39	14	34	1.7859	0.7357	1.6557	65	48	73	3.3616	2.6679	3.8738
AT1G19396	AT1G19396	unknown protein,[Source:TAIR;Acc:AT1G19396]	56	40	49	2.5643	2.1019	2.3862	88	45	149	4.551	2.5012	7.9068
AT1G19400	AT1G19400	Erythronate-4-phosphate dehydrogenase family protein,[Source:TAIR;Acc:AT1G19400]	664	575	641	30.4053	30.2147	31.2148	567	545	554	29.3231	30.2923	29.3985
AT1G19430	AT1G19430	S-adenosyl-L-methionine-dependent methyltransferases superfamily protein,[Source:TAIR;Acc:AT1G19430]	363	389	396	16.6222	20.4409	19.284	323	316	390	16.7043	17.5639	20.6957
AT1G19440	KCS4	3-ketoacyl-CoA synthase 4,[Source:TAIR;Acc:AT1G19440]	539	463	457	24.6814	24.3294	22.2546	420	330	331	21.7208	18.3421	17.5648
AT1G19450	AT1G19450	Major facilitator superfamily protein,[Source:TAIR;Acc:AT1G19450]	530	554	471	24.2693	29.1112	22.9363	1286	921	1265	66.507	51.1911	67.1283
AT1G19480	AT1G19480	DNA glycosylase superfamily protein,[Source:TAIR;Acc:AT1G19480]	109	103	110	4.9912	5.4124	5.3567	89	91	127	4.6027	5.058	6.7394
AT1G19485	AT1G19485	Transducin/WD40 repeat-like superfamily protein,[Source:TAIR;Acc:AT1G19485]	304	209	227	13.9205	10.9824	11.0542	286	259	303	14.7908	14.3958	16.079
AT1G19490	AT1G19490	Basic-leucine zipper (bZIP) transcription factor family protein,[Source:TAIR;Acc:AT1G19490]	327	250	278	14.9737	13.1368	13.5378	58	67	39	2.9995	3.724	2.0696
AT1G19520	NFD5	pentatricopeptide (PPR) repeat-containing protein,[Source:TAIR;Acc:AT1G19520]	1118	1154	1117	51.1945	60.6396	54.3946	484	445	568	25.0306	24.734	30.1414
AT1G19530	AT1G19530	unknown protein,[Source:TAIR;Acc:AT1G19530]	130	51	43	5.9529	2.6799	2.094	376	61	229	19.4453	3.3905	12.1521
AT1G19540	AT1G19540	NmrA-like negative transcriptional regulator family protein,[Source:TAIR;Acc:AT1G19540]	30	18	20	1.3737	0.9459	0.9739	43	26	35	2.2238	1.4451	1.8573
AT1G19550	AT1G19550	Glutathione S-transferase family protein,[Source:TAIR;Acc:AT1G19550]	78	76	107	3.5717	3.9936	5.2106	101	138	99	5.2233	7.6703	5.2535
AT1G19570	DHAR1	dehydroascorbate reductase,[Source:TAIR;Acc:AT1G19570]	959	928	1311	43.9137	48.7639	63.8419	961	1049	1027	49.6993	58.3056	54.4987
AT1G19580	GAMMA CA1	gamma carbonic anhydrase 1,[Source:TAIR;Acc:AT1G19580]	309	301	231	14.1495	15.8167	11.249	323	285	337	16.7043	15.8409	17.8832
AT1G19600	AT1G19600	pfkB-like carbohydrate kinase family protein,[Source:TAIR;Acc:AT1G19600]	758	781	786	34.7097	41.0395	38.2759	898	631	1189	46.4411	35.0723	63.0953
AT1G19610	LCR78	Arabidopsis defensin-like protein,[Source:TAIR;Acc:AT1G19610]	156	127	311	7.1434	6.6735	15.1448	33	15	123	1.7066	0.8337	6.5271
AT1G19650	AT1G19650	Sec14p-like phosphatidylinositol transfer family protein,[Source:TAIR;Acc:AT1G19650]	167	146	161	7.6471	7.6719	7.8402	302	267	215	15.6183	14.8404	11.4092
AT1G19660	AT1G19660	Wound-responsive family protein,[Source:TAIR;Acc:AT1G19660]	692	532	683	31.6875	27.9552	33.2601	1395	1282	1338	72.1441	71.2563	71.0021
AT1G19670	ATCLH1	chlorophyllase 1,[Source:TAIR;Acc:AT1G19670]	514	326	499	23.5367	17.1304	24.2998	266	212	370	13.7565	11.7834	19.6344
AT1G19680	AT1G19680	RING/U-box superfamily protein,[Source:TAIR;Acc:AT1G19680]	153	125	140	7.0061	6.5684	6.8176	101	74	137	5.2233	4.1131	7.27
AT1G19680	AT1G19680	RING/U-box superfamily protein,[Source:TAIR;Acc:AT1G19680]	425	324	363	19.4613	17.0253	17.677	490	415	514	25.3409	23.0666	27.2759
AT1G19700	BEL10	BEL1-like homeodomain 10,[Source:TAIR;Acc:AT1G19700]	1166	1018	1254	53.3925	53.4932	61.0661	661	687	481	34.1844	38.1849	25.5247
AT1G19710	AT1G19710	UDP-Glycosyltransferase superfamily protein,[Source:TAIR;Acc:AT1G19710]	231	230	233	10.5778	12.0859	11.3464	208	171	189	10.757	9.5045	10.0295
AT1G19710	AT1G19710	UDP-Glycosyltransferase superfamily protein,[Source:TAIR;Acc:AT1G19710]	851	627	610	38.9683	32.9472	29.7052	868	806	730	44.8897	44.7992	38.7381
AT1G19720	AT1G19720	Pentatricopeptide repeat (PPR-like) superfamily protein,[Source:TAIR;Acc:AT1G19720]	1328	1065	1019	60.8107	55.9629	49.6223	1352	1175	1154	69.9203	65.309	61.238
AT1G19730	ATTRX4	Thioredoxin superfamily protein,[Source:TAIR;Acc:AT1G19730]	156	140	142	7.1434	7.3566	6.915	108	91	123	5.5853	5.058	6.5271
AT1G19740	AT1G19740	ATP-dependent protease La (LON) domain protein,[Source:TAIR;Acc:AT1G19740]	1140	821	1107	52.2019	43.1413	53.9077	1237	1164	1216	63.9729	64.6976	64.5281
AT1G19750	AT1G19750	Transducin/WD40 repeat-like superfamily protein,[Source:TAIR;Acc:AT1G19750]	23	15	20	1.0532	0.7882	0.9739	28	29	29	1.4481	1.6119	1.5389
AT1G19770	ATPUP14	purine permease 14,[Source:TAIR;Acc:AT1G19770]	345	302	340	15.798	15.8693	16.557	1117	1006	976	57.767	55.9156	51.7923
AT1G19800	TGD1	trigalactosyldiacylglycerol 1,[Source:TAIR;Acc:AT1G19800]	391	417	378	17.9044	21.9122	18.4075	578	530	697	29.892	29.4585	36.9869
AT1G19835	AT1G19835	Plant protein of unknown function (DUF869),[Source:TAIR;Acc:AT1G19835]	880	908	1077	40.2962	47.713	52.4468	1777	1359	1501	91.8997	75.5361	79.6519
AT1G19840	AT1G19840	SAUR-like auxin-responsive protein family,[Source:TAIR;Acc:AT1G19840]	20	24	42	0.9158	1.2611	2.0453	23	13	13	1.1895	0.7226	0.6899
AT1G19850	MP	Transcriptional factor B3 family protein / auxin-responsive factor AUX/IAA-related,[Source:TAIR;Acc:AT1G19850]	344	315	460	15.7522	16.5524	22.4007	260	272	165	13.4462	15.1183	8.7559
AT1G19860	AT1G19860	Zinc finger C-x8-C-x5-C-x3-H type family protein,[Source:TAIR;Acc:AT1G19860]	341	288	309	15.6148	15.1336	15.0474	262	211	237	13.5496	11.7278	12.5766
AT1G19870	iqd32	IQ-domain 32,[Source:TAIR;Acc:AT1G19870]	1225	1187	1031	56.0942	62.3737	50.2067	1151	997	1194	59.5253	55.4154	63.3607
AT1G19880	AT1G19880	Regulator of chromosome condensation (RCC1) family protein,[Source:TAIR;Acc:AT1G19880]	659	551	539	30.1764	28.9536	26.2477	429	412	430	22.1863	22.8998	22.8183
AT1G19900	AT1G19900	glyoxal oxidase-related protein,[Source:TAIR;Acc:AT1G19900]	166	135	50	7.6013	7.0939	2.4349	297	403	49	15.3597	22.3996	2.6002
AT1G19910	AVA-P2	ATPase, F0/V0 complex, subunit C protein,[Source:TAIR;Acc:AT1G19910]	2151	1789	2018	98.4968	94.0071	98.2707	3116	2482	3218	161.1477	137.9548	170.766
AT1G19920	APS2	Pseudouridine synthase/archaeosine transglycosylase-like family protein,[Source:TAIR;Acc:AT1G19920]	1685	1712	1806	77.1581	89.961	87.9469	1950	1793	1894	100.8466	99.6587	100.5068
AT1G19950	HVA22H	HVA22-like protein H (ATHVA22H),[Source:TAIR;Acc:AT1G19950]	79	80	70	3.6175	4.2038	3.4088	90	92	91	4.6545	5.1136	4.829
AT1G19970	AT1G19970	ER lumen protein retaining receptor family protein,[Source:TAIR;Acc:AT1G19970]	70	61	48	3.2054	3.2054	2.3375	57	42	48	2.9478	2.3344	2.5472
AT1G19980	AT1G19980	cytomatrix protein-related,[Source:TAIR;Acc:AT1G19980]	46	46	64	2.1064	2.4172	3.1166	48	56	54	2.4824	3.1126	2.8656
AT1G19990	AT1G19990	unknown protein,[Source:TAIR;Acc:AT1G19990]	170	142	148	7.7845	7.4617	7.2072	94	77	113	4.8613	4.2798	5.9964
AT1G20020	ATLFNR2	ferredoxin-NADP(+)-oxidoreductase 2,[Source:TAIR;Acc:AT1G20020]	2656	2436	2334	121.621	128.005	113.659	3907	3730	3013	202.0552	207.3213	159.8875
AT1G20030	AT1G20030	Pathogenesis-related thaumatin superfamily protein,[Source:TAIR;Acc:AT1G20030]	74	40	31	3.3886	2.1019	1.5096	22	23	10	1.1378	1.2784	0.5307
AT1G20050	HYD1	C-8,7 sterol isomerase,[Source:TAIR;Acc:AT1G20050]	426	450	431	19.507	23.6463	20.9884	526	453	446	27.2027	25.1787	23.6674
AT1G20060	AT1G20060	ATP binding microtubule motor family protein,[Source:TAIR;Acc:AT1G20060]	42	35	34	1.9232	1.8392	1.6557	32	25	26	1.6549	1.3896	1.3797
AT1G20065	AT1G20065	No description	253	189	170	11.5852	9.9314	8.2785	59	49	53	3.0513	2.7235	2.8125
AT1G20090	ARAC4	RHO-related protein from plants 2,[Source:TAIR;Acc:AT1G20090]	449	435	299	20.5602	22.8581	14.5604	932	780	687	48.1995	43.354	36.4563
AT1G20100	AT1G20100	unknown protein,[Source:TAIR;Acc:AT1G20100]	664	700	717	30.4053	36.7831	34.9158	548	445	742	28.3405	24.734	39.3749
AT1G20110	AT1G20110	RING/FYVE/PHD zinc finger superfamily protein,[Source:TAIR;Acc:AT1G20110]	1202	959	1162	55.041	50.3929	56.586	1376	1092	1313	71.1615	60.6957	69.6755
AT1G20140	ASK4	SKP1-like 4,[Source:TAIR;Acc:AT1G20140]	145	152	133	6.6397	7.9872	6.4767	120	79	122	6.2059	4.391	6.474
AT1G20160	ATSBT5,2	Subtilisin-like serine endopeptidase family protein,[Source:TAIR;Acc:AT1G20160]	275	358	333	12.5926	18.8119	16.2161	573	454	479	29.6334	25.2343	25.4186
AT1G20190	ATEXPA11	expansin 11,[Source:TAIR;Acc:AT1G20190]	225	341	222	10.303	17.9186	10.8108	295	256	387	15.2563	14.229	20.5365
AT1G20200	EMB2719	PAM domain (PCI/PINT associated module) protein,[Source:TAIR;Acc:AT1G20200]	758	833	784	34.7097	43.7719	38.1785	882	819	1034	45.6137	45.5217	54.8701
AT1G20220	AT1G20220	Alba DNA/RNA-binding protein,[Source:TAIR;Acc:AT1G20220]	2052	1654	1581	93.9635	86.9133	76.9901	1120	883	1155	57.9221	49.079	61.2911
AT1G20225	AT1G20225	Thioredoxin superfamily protein,[Source:TAIR;Acc:AT1G20225]	329	343	384	15.0653	18.0237	18.6997	593	601	603	30.6677	33.4048	31.9987
AT1G20230	AT1G20230	Pentatricopeptide repeat (PPR) superfamily protein,[Source:TAIR;Acc:AT1G20230]	66	65	54	3.0222	3.4156	2.6296	30	31	30	1.5515	1.723	1.592
AT1G20260	AT1G20260	ATPase, V1 complex, subunit B protein,[Source:TAIR;Acc:AT1G20260]	681	675	813	31.1838	35.4694	39.5907	1738	1597	1623	89.8828	88.7646	86.1259
AT1G20270	AT1G20270	2-oxoglutarate (2OG) and Fe(II)-dependent oxygenase superfamily protein,[Source:TAIR;Acc:AT1G20270]	95	97	68	4.3502	5.0971	3.3114	82	94	120	4.2407	5.2247	6.3679
AT1G20290	AT1G20290	SWI-SNF-related chromatin binding protein,[Source:TAIR;Acc:AT1G20290]	373	304	282	17.0801	15.9744	13.7326	140	145	155	7.2403	8.0594	8.2252
AT1G20330	SMT2	sterol methyltransferase 2,[Source:TAIR;Acc:AT1G20330]	1993	1772	1442	91.2618	93.1138	70.2212	2592	2268	1680	134.0484	126.0602	89.1507
AT1G20350	ATTIM17-1	translocase inner membrane subunit 17-1,[Source:TAIR;Acc:AT1G20350]	124	96	272	5.6781	5.0445	13.2456	62	41	191	3.2064	2.2789	10.1356
AT1G20370	AT1G20370	Pseudouridine synthase family protein,[Source:TAIR;Acc:AT1G20370]	696	619	704	31.8707	32.5268	34.2827	221	227	300	11.4293	12.6171	15.9198
AT1G20380	AT1G20380	Prolyl oligopeptidase family protein,[Source:TAIR;Acc:AT1G20380]	110	139	76	5.037	7.3041	3.701	108	72	83	5.5853	4.0019	4.4045
AT1G20390	AT1G20390	transposable element gene,[Source:TAIR;Acc:AT1G20390]	2149	1219	1823	98.4053	64.0552	88.7748	2984	1174	4290	154.3211	65.2534	227.6526
AT1G20400	AT1G20400	Protein of unknown function (DUF1204),[Source:TAIR;Acc:AT1G20400]	71	34	48	3.2512	1.7866	2.3375	117	69	171	6.0508	3.8352	9.0743
AT1G20410	AT1G20410	Pseudouridine synthase family protein,[Source:TAIR;Acc:AT1G20410]	38	51	71	1.7401	2.6799	3.4575	72	72	101	3.7236	4.0019	5.3597
AT1G20430	AT1G20430	unknown protein,[Source:TAIR;Acc:AT1G20430]	308	300	329	14.1037	15.7642	16.0213	221	178	305	11.4293	9.8936	16.1851
AT1G20440	COR47	cold-regulated 47,[Source:TAIR;Acc:AT1G20440]	3354	2646	1897	153.584	139.04	92.3784	3230	2824	1351	167.0433	156.9639	71.692
AT1G20450	LTI29	Dehydrin family protein,[Source:TAIR;Acc:AT1G20450]	1443	1367	1136	66.0767	71.8322	55.3199	1077	1092	617	55.6983	60.6957	32.7416
AT1G20460	AT1G20460	unknown protein,[Source:TAIR;Acc:AT1G20460]	62	65	86	2.8391	3.4156	4.188	106	77	119	5.4819	4.2798	6.3148
AT1G20470	AT1G20470	SAUR-like auxin-responsive protein family,[Source:TAIR;Acc:AT1G20470]	56	48	37	2.5643	2.5223	1.8018	47	39	66	2.4307	2.1677	3.5023
AT1G20470	AT1G20470	SAUR-like auxin-responsive protein family,[Source:TAIR;Acc:AT1G20470]	137	108	81	6.2734	5.6751	3.9445	82	85	61	4.2407	4.7245	3.237
AT1G20490	AT1G20490	AMP-dependent synthetase and ligase family protein,[Source:TAIR;Acc:AT1G20490]	64	56	58	2.9306	2.9427	2.8244	37	56	49	1.9135	3.1126	2.6002
AT1G20510	OPCL1	OPC-8:0 CoA ligase1,[Source:TAIR;Acc:AT1G20510]	203	199	249	9.2956	10.4569	12.1256	115	161	178	5.9474	8.9487	9.4457
AT1G20540	AT1G20540	Transducin/WD40 repeat-like superfamily protein,[Source:TAIR;Acc:AT1G20540]	71	72	78	3.2512	3.7834	3.7984	219	190	262	11.3258	10.5606	13.9033
AT1G20540	AT1G20540	Transducin/WD40 repeat-like superfamily protein,[Source:TAIR;Acc:AT1G20540]	57	72	76	2.6101	3.7834	3.701	60	65	62	3.103	3.6128	3.2901
AT1G20560	AAE1	acyl activating enzyme 1,[Source:TAIR;Acc:AT1G20560]	798	727	646	36.5414	38.2019	31.4583	507	497	598	26.2201	27.6243	31.7334
AT1G20575	AT1G20575	Nucleotide-diphospho-sugar transferases superfamily protein,[Source:TAIR;Acc:AT1G20575]	123	124	130	5.6323	6.5159	6.3306	156	143	167	8.0677	7.9482	8.862
AT1G20580	AT1G20580	Small nuclear ribonucleoprotein family protein,[Source:TAIR;Acc:AT1G20580]	874	658	774	40.0215	34.5761	37.6915	378	372	422	19.5487	20.6765	22.3938
AT1G20610	CYCB2;3	Cyclin B2;3,[Source:TAIR;Acc:AT1G20610]	69	61	72	3.1596	3.2054	3.5062	52	47	38	2.6892	2.6124	2.0165
AT1G20620	CAT3	catalase 3,[Source:TAIR;Acc:AT1G20620]	4716	3997	9478	215.951	210.032	461.551	6168	4654	10565	318.9855	258.6791	560.641
AT1G20630	CAT1	catalase 1,[Source:TAIR;Acc:AT1G20630]	779	680	716	35.6713	35.7322	34.8671	516	321	679	26.6856	17.8419	36.0317
AT1G20640	AT1G20640	Plant regulator RWP-RK family protein,[Source:TAIR;Acc:AT1G20640]	240	260	191	10.9899	13.6623	9.3011	312	309	260	16.1355	17.1749	13.7971
AT1G20650	AT1G20650	Protein kinase superfamily protein,[Source:TAIR;Acc:AT1G20650]	236	282	318	10.8067	14.8183	15.4857	683	619	636	35.3222	34.4053	33.7499
AT1G20670	AT1G20670	DNA-binding bromodomain-containing protein,[Source:TAIR;Acc:AT1G20670]	342	368	364	15.6606	19.3374	17.7257	440	381	505	22.7551	21.1768	26.7983
AT1G20690	AT1G20690	SWI-SNF-related chromatin binding protein,[Source:TAIR;Acc:AT1G20690]	44	31	39	2.0148	1.629	1.8992	44	42	49	2.2755	2.3344	2.6002
AT1G20690	AT1G20690	SWI-SNF-related chromatin binding protein,[Source:TAIR;Acc:AT1G20690]	43	31	39	1.969	1.629	1.8992	44	41	47	2.2755	2.2789	2.4941
AT1G20693	HMGB2	high mobility group B2,[Source:TAIR;Acc:AT1G20693]	426	405	391	19.507	21.2817	19.0406	481	398	458	24.8755	22.1217	24.3042
AT1G20696	HMGB3	high mobility group B3,[Source:TAIR;Acc:AT1G20696]	412	304	354	18.866	15.9744	17.2388	468	465	463	24.2032	25.8457	24.5695
AT1G20720	AT1G20720	RAD3-like DNA-binding helicase protein,[Source:TAIR;Acc:AT1G20720]	49	78	62	2.2438	4.0987	3.0192	53	43	65	2.741	2.39	3.4493
AT1G20760	AT1G20760	Calcium-binding EF hand family protein,[Source:TAIR;Acc:AT1G20760]	590	470	564	27.0168	24.6972	27.4652	896	802	1015	46.3377	44.5769	53.8619
AT1G20770	AT1G20770	unknown protein,[Source:TAIR;Acc:AT1G20770]	188	184	205	8.6087	9.6687	9.9829	213	188	261	11.0156	10.4494	13.8502
AT1G20780	PUB44	senescence-associated E3 ubiquitin ligase 1,[Source:TAIR;Acc:AT1G20780]	322	295	281	14.7448	15.5015	13.6839	378	368	371	19.5487	20.4542	19.6874
AT1G20810	AT1G20810	FKBP-like peptidyl-prolyl cis-trans isomerase family protein,[Source:TAIR;Acc:AT1G20810]	187	146	178	8.563	7.6719	8.6681	553	624	545	28.5991	34.6832	28.9209
AT1G20816	AT1G20816	unknown protein,[Source:TAIR;Acc:AT1G20816]	34	45	39	1.5569	2.3646	1.8992	110	107	124	5.6888	5.9473	6.5802
AT1G20823	AT1G20823	RING/U-box superfamily protein,[Source:TAIR;Acc:AT1G20823]	75	53	42	3.4343	2.785	2.0453	96	101	40	4.9648	5.6138	2.1226
AT1G20830	MCD1	multiple chloroplast division site 1,[Source:TAIR;Acc:AT1G20830]	177	233	203	8.105	12.2435	9.8855	310	318	242	16.032	17.6751	12.8419
AT1G20840	TMT1	tonoplast monosaccharide transporter1,[Source:TAIR;Acc:AT1G20840]	527	518	470	24.132	27.2195	22.8876	505	503	442	26.1167	27.9578	23.4551
AT1G20850	XCP2	xylem cysteine peptidase 2,[Source:TAIR;Acc:AT1G20850]	1005	859	608	46.0201	45.1381	29.6078	997	837	450	51.5611	46.5222	23.8796
AT1G20870	AT1G20870	HSP20-like chaperones superfamily protein,[Source:TAIR;Acc:AT1G20870]	99	91	82	4.5333	4.7818	3.9932	45	33	33	2.3272	1.8342	1.7512
AT1G20880	AT1G20880	RNA-binding (RRM/RBD/RNP motifs) family protein,[Source:TAIR;Acc:AT1G20880]	107	92	116	4.8997	4.8344	5.6489	170	139	137	8.7918	7.7259	7.27
AT1G20890	AT1G20890	unknown protein,[Source:TAIR;Acc:AT1G20890]	74	66	57	3.3886	3.4681	2.7757	72	84	77	3.7236	4.6689	4.0861
AT1G20900	ESC	Predicted AT-hook DNA-binding family protein,[Source:TAIR;Acc:AT1G20900]	385	295	294	17.6296	15.5015	14.3169	247	175	179	12.7739	9.7269	9.4988
AT1G20910	AT1G20910	ARID/BRIGHT DNA-binding domain-containing protein,[Source:TAIR;Acc:AT1G20910]	122	135	129	5.5865	7.0939	6.2819	143	141	182	7.3954	7.8371	9.658
AT1G20920	AT1G20920	P-loop containing nucleoside triphosphate hydrolases superfamily protein,[Source:TAIR;Acc:AT1G20920]	1958	1639	1676	89.6591	86.125	81.6163	986	834	1308	50.9922	46.3555	69.4102
AT1G20930	CDKB2;2	cyclin-dependent kinase B2;2,[Source:TAIR;Acc:AT1G20930]	78	58	49	3.5717	3.0477	2.3862	53	80	66	2.741	4.4466	3.5023
AT1G20950	AT1G20950	Phosphofructokinase family protein,[Source:TAIR;Acc:AT1G20950]	444	568	438	20.3313	29.8469	21.3293	1195	1255	1060	61.8009	69.7555	56.2498
AT1G20960	emb1507	U5 small nuclear ribonucleoprotein helicase, putative,[Source:TAIR;Acc:AT1G20960]	6035	5553	6401	276.35	291.795	311.71	3618	3283	4348	187.1092	182.4761	230.7305
AT1G20970	AT1G20970	No description	1185	1293	1285	54.2626	67.9437	62.5757	1647	1346	1855	85.1766	74.8135	98.4372
AT1G20980	SPL14	squamosa promoter binding protein-like 14,[Source:TAIR;Acc:AT1G20980]	1014	1017	1068	46.4323	53.4406	52.0085	1206	1025	1258	62.3697	56.9717	66.7569
AT1G21000	AT1G21000	PLATZ transcription factor family protein,[Source:TAIR;Acc:AT1G21000]	329	352	402	15.0653	18.4967	19.5762	540	408	471	27.9267	22.6775	24.994
AT1G21010	AT1G21010	unknown protein,[Source:TAIR;Acc:AT1G21010]	72	79	114	3.297	4.1512	5.5515	115	59	128	5.9474	3.2793	6.7924
AT1G21050	AT1G21050	Protein of unknown function, DUF617,[Source:TAIR;Acc:AT1G21050]	711	594	576	32.5575	31.2131	28.0495	508	479	567	26.2718	26.6238	30.0884
AT1G21060	AT1G21060	Protein of unknown function, DUF547,[Source:TAIR;Acc:AT1G21060]	108	121	122	4.9455	6.3582	5.941	314	263	343	16.2389	14.6181	18.2016
AT1G21065	AT1G21065	unknown protein,[Source:TAIR;Acc:AT1G21065]	366	286	365	16.7596	15.0285	17.7744	733	752	691	37.908	41.7977	36.6685
AT1G21070	AT1G21070	Nucleotide-sugar transporter family protein,[Source:TAIR;Acc:AT1G21070]	104	86	68	4.7623	4.5191	3.3114	129	101	140	6.6714	5.6138	7.4292
AT1G21080	AT1G21080	DNAJ heat shock N-terminal domain-containing protein,[Source:TAIR;Acc:AT1G21080]	280	312	303	12.8215	16.3948	14.7552	500	403	493	25.8581	22.3996	26.1615
AT1G21090	AT1G21090	Cupredoxin superfamily protein,[Source:TAIR;Acc:AT1G21090]	87	64	64	3.9838	3.363	3.1166	60	47	40	3.103	2.6124	2.1226
AT1G21100	AT1G21100	O-methyltransferase family protein,[Source:TAIR;Acc:AT1G21100]	283	164	140	12.9589	8.6178	6.8176	379	150	154	19.6004	8.3373	8.1721
AT1G21110	AT1G21110	O-methyltransferase family protein,[Source:TAIR;Acc:AT1G21110]	373	301	299	17.0801	15.8167	14.5604	213	141	139	11.0156	7.8371	7.3762
AT1G21120	AT1G21120	O-methyltransferase family protein,[Source:TAIR;Acc:AT1G21120]	250	210	231	11.4478	11.0349	11.249	98	44	74	5.0682	2.4456	3.9269
AT1G21130	AT1G21130	O-methyltransferase family protein,[Source:TAIR;Acc:AT1G21130]	342	326	364	15.6606	17.1304	17.7257	839	644	721	43.3899	35.7949	38.2605
AT1G21140	AT1G21140	Vacuolar iron transporter (VIT) family protein,[Source:TAIR;Acc:AT1G21140]	38	17	28	1.7401	0.8933	1.3635	11	46	7	0.5689	2.5568	0.3715
AT1G21150	AT1G21150	Mitochondrial transcription termination factor family protein,[Source:TAIR;Acc:AT1G21150]	48	32	22	2.198	1.6815	1.0713	30	40	42	1.5515	2.2233	2.2288
AT1G21160	AT1G21160	eukaryotic translation initiation factor 2 (eIF-2) family protein,[Source:TAIR;Acc:AT1G21160]	469	365	361	21.4761	19.1798	17.5796	264	275	267	13.6531	15.2851	14.1686
AT1G21170	SEC5B	Exocyst complex component SEC5,[Source:TAIR;Acc:AT1G21170]	238	247	246	10.8983	12.9792	11.9795	325	291	332	16.8078	16.1744	17.6179
AT1G21190	AT1G21190	Small nuclear ribonucleoprotein family protein,[Source:TAIR;Acc:AT1G21190]	237	227	268	10.8525	11.9282	13.0508	193	162	187	9.9812	9.0043	9.9233
AT1G21200	AT1G21200	sequence-specific DNA binding transcription factors,[Source:TAIR;Acc:AT1G21200]	229	223	201	10.4862	11.7181	9.7881	142	112	144	7.3437	6.2252	7.6415
AT1G21250	WAK1	cell wall-associated kinase,[Source:TAIR;Acc:AT1G21250]	133	135	285	6.0902	7.0939	13.8787	55	39	60	2.8444	2.1677	3.184
AT1G21260	AT1G21260	transposable element gene,[Source:TAIR;Acc:AT1G21260]	95	73	118	4.3502	3.836	5.7463	54	33	72	2.7927	1.8342	3.8207
AT1G21270	WAK2	wall-associated kinase 2,[Source:TAIR;Acc:AT1G21270]	124	95	180	5.6781	4.992	8.7655	187	228	230	9.6709	12.6727	12.2052
AT1G21270	WAK2	wall-associated kinase 2,[Source:TAIR;Acc:AT1G21270]	129	108	106	5.9071	5.6751	5.1619	93	85	80	4.8096	4.7245	4.2453
AT1G21310	ATEXT3	extensin 3,[Source:TAIR;Acc:AT1G21310]	29211	24408	20786	1337.61	1282.57	1012.22	33542	27997	16972	1734.6649	1556.1324	900.6341
AT1G21350	AT1G21350	Thioredoxin superfamily protein,[Source:TAIR;Acc:AT1G21350]	139	92	113	6.365	4.8344	5.5028	425	461	538	21.9794	25.6234	28.5494
AT1G21360	GLTP2	glycolipid transfer protein 2,[Source:TAIR;Acc:AT1G21360]	14	13	22	0.6411	0.6831	1.0713	39	47	60	2.0169	2.6124	3.184
AT1G21370	AT1G21370	unknown protein,[Source:TAIR;Acc:AT1G21370]	520	446	548	23.8114	23.4361	26.686	522	502	645	26.9959	27.9022	34.2275
AT1G21370	AT1G21370	unknown protein,[Source:TAIR;Acc:AT1G21370]	159	212	142	7.2808	11.14	6.915	210	188	231	10.8604	10.4494	12.2582
AT1G21390	emb2170	embryo defective 2170,[Source:TAIR;Acc:AT1G21390]	47	41	62	2.1522	2.1544	3.0192	39	37	50	2.0169	2.0565	2.6533
AT1G21400	AT1G21400	Thiamin diphosphate-binding fold (THDP-binding) superfamily protein,[Source:TAIR;Acc:AT1G21400]	549	460	618	25.1394	24.1718	30.0948	734	428	1006	37.9597	23.7891	53.3843
AT1G21410	SKP2A	F-box/RNI-like superfamily protein,[Source:TAIR;Acc:AT1G21410]	246	263	333	11.2646	13.8199	16.2161	490	352	410	25.3409	19.5649	21.757
AT1G21430	YUC11	Flavin-binding monooxygenase family protein,[Source:TAIR;Acc:AT1G21430]	503	479	486	23.033	25.1702	23.6668	351	435	274	18.1524	24.1782	14.5401
AT1G21450	SCL1	SCARECROW-like 1,[Source:TAIR;Acc:AT1G21450]	523	525	575	23.9488	27.5873	28.0008	609	553	644	31.4952	30.7369	34.1744
AT1G21460	AT1G21460	Nodulin MtN3 family protein,[Source:TAIR;Acc:AT1G21460]	213	282	180	9.7535	14.8183	8.7655	423	140	449	21.876	7.7815	23.8266
AT1G21480	AT1G21480	Exostosin family protein,[Source:TAIR;Acc:AT1G21480]	61	93	88	2.7933	4.8869	4.2853	199	219	244	10.2915	12.1725	12.9481
AT1G21500	AT1G21500	unknown protein,[Source:TAIR;Acc:AT1G21500]	1065	800	789	48.7676	42.0379	38.422	3303	3236	2710	170.8186	179.8637	143.8085
AT1G21520	AT1G21520	unknown protein,[Source:TAIR;Acc:AT1G21520]	196	164	280	8.9751	8.6178	13.6352	104	2	150	5.3785	0.1112	7.9599
AT1G21540	AT1G21540	AMP-dependent synthetase and ligase family protein,[Source:TAIR;Acc:AT1G21540]	106	119	90	4.8539	6.2531	4.3827	131	63	99	6.7748	3.5017	5.2535
AT1G21560	AT1G21560	unknown protein,[Source:TAIR;Acc:AT1G21560]	242	190	185	11.0815	9.984	9.009	146	117	140	7.5506	6.5031	7.4292
AT1G21580	AT1G21580	Zinc finger C-x8-C-x5-C-x3-H type family protein,[Source:TAIR;Acc:AT1G21580]	1461	1237	1457	66.9009	65.001	70.9516	1194	1160	1330	61.7491	64.4752	70.5776
AT1G21590	AT1G21590	Protein kinase protein with adenine nucleotide alpha hydrolases-like domain,[Source:TAIR;Acc:AT1G21590]	720	781	769	32.9697	41.0395	37.4481	557	556	595	28.8059	30.9037	31.5742
AT1G21600	PTAC6	plastid transcriptionally active 6,[Source:TAIR;Acc:AT1G21600]	1095	748	760	50.1413	39.3054	37.0098	696	648	819	35.9945	36.0172	43.461
AT1G21610	AT1G21610	wound-responsive family protein,[Source:TAIR;Acc:AT1G21610]	212	197	229	9.7077	10.3518	11.1516	255	242	342	13.1876	13.4509	18.1485
AT1G21630	AT1G21630	Calcium-binding EF hand family protein,[Source:TAIR;Acc:AT1G21630]	1379	1234	1244	63.146	64.8434	60.5792	1748	1612	1665	90.3999	89.5984	88.3547
AT1G21640	NADK2	NAD kinase 2,[Source:TAIR;Acc:AT1G21640]	321	316	334	14.699	16.605	16.2648	298	355	371	15.4114	19.7316	19.6874
AT1G21640	NADK2	NAD kinase 2,[Source:TAIR;Acc:AT1G21640]	1495	1379	1526	68.4578	72.4627	74.3117	1541	1696	1459	79.6947	94.2673	77.4231
AT1G21650	AT1G21650	Preprotein translocase SecA family protein,[Source:TAIR;Acc:AT1G21650]	136	117	144	6.2276	6.148	7.0124	106	107	105	5.4819	5.9473	5.5719
AT1G21660	AT1G21660	Chaperone DnaJ-domain superfamily protein,[Source:TAIR;Acc:AT1G21660]	564	510	510	25.8262	26.7991	24.8355	674	600	597	34.8567	33.3493	31.6803
AT1G21670	AT1G21670	No description	305	282	302	13.9663	14.8183	14.7065	276	273	249	14.2737	15.1739	13.2134
AT1G21680	AT1G21680	DPP6 N-terminal domain-like protein,[Source:TAIR;Acc:AT1G21680]	1267	854	1331	58.0174	44.8754	64.8158	1114	1015	1050	57.6118	56.4158	55.7192
AT1G21690	EMB1968	ATPase family associated with various cellular activities (AAA),[Source:TAIR;Acc:AT1G21690]	92	71	81	4.2128	3.7309	3.9445	167	145	166	8.6366	8.0594	8.8089
AT1G21695	AT1G21695	hydroxyproline-rich glycoprotein family protein,[Source:TAIR;Acc:AT1G21695]	23	14	23	1.0532	0.7357	1.12	8	23	6	0.4137	1.2784	0.3184
AT1G21700	ATSWI3C	SWITCH/sucrose nonfermenting 3C,[Source:TAIR;Acc:AT1G21700]	657	549	531	30.0848	28.8485	25.8581	591	497	598	30.5643	27.6243	31.7334
AT1G21710	OGG1	8-oxoguanine-DNA glycosylase 1,[Source:TAIR;Acc:AT1G21710]	213	167	211	9.7535	8.7754	10.2751	227	232	312	11.7396	12.895	16.5566
AT1G21720	PBC1	proteasome beta subunit C1,[Source:TAIR;Acc:AT1G21720]	314	310	331	14.3784	16.2897	16.1187	680	507	834	35.167	28.1801	44.2569
AT1G21730	AT1G21730	P-loop containing nucleoside triphosphate hydrolases superfamily protein,[Source:TAIR;Acc:AT1G21730]	123	109	71	5.6323	5.7277	3.4575	195	189	200	10.0847	10.505	10.6132
AT1G21740	AT1G21740	Protein of unknown function (DUF630 and DUF632),[Source:TAIR;Acc:AT1G21740]	201	186	151	9.204	9.7738	7.3533	78	98	90	4.0339	5.447	4.7759
AT1G21750	ATPDIL1-1	PDI-like 1-1,[Source:TAIR;Acc:AT1G21750]	1411	2080	1566	64.6114	109.298	76.2596	1165	973	1621	60.2494	54.0814	86.0198
AT1G21760	ATFBP7	F-box protein 7,[Source:TAIR;Acc:AT1G21760]	1128	778	1224	51.6525	40.8818	59.6052	739	736	832	38.2183	40.9084	44.1508
AT1G21760	ATFBP7	F-box protein 7,[Source:TAIR;Acc:AT1G21760]	155	165	201	7.0976	8.6703	9.7881	402	347	406	20.7899	19.287	21.5447
AT1G21770	AT1G21770	Acyl-CoA N-acyltransferases (NAT) superfamily protein,[Source:TAIR;Acc:AT1G21770]	1370	983	1404	62.7339	51.654	68.3707	1059	988	1100	54.7675	54.9151	58.3725
AT1G21790	AT1G21790	TRAM, LAG1 and CLN8 (TLC) lipid-sensing domain containing protein,[Source:TAIR;Acc:AT1G21790]	74	69	80	3.3886	3.6258	3.8958	168	116	135	8.6883	6.4475	7.1639
AT1G21810	AT1G21810	Plant protein of unknown function (DUF869),[Source:TAIR;Acc:AT1G21810]	97	75	83	4.4417	3.9411	4.0419	42	40	19	2.1721	2.2233	1.0083
AT1G21830	AT1G21830	unknown protein,[Source:TAIR;Acc:AT1G21830]	143	178	184	6.5481	9.3534	8.9603	368	330	607	19.0316	18.3421	32.211
AT1G21840	UREF	urease accessory protein F,[Source:TAIR;Acc:AT1G21840]	33	30	33	1.5111	1.5764	1.607	71	61	92	3.6719	3.3905	4.8821
AT1G21880	LYM1	lysm domain GPI-anchored protein 1 precursor,[Source:TAIR;Acc:AT1G21880]	235	238	219	10.7609	12.5063	10.6647	280	316	323	14.4805	17.5639	17.1403
AT1G21900	AT1G21900	emp24/gp25L/p24 family/GOLD family protein,[Source:TAIR;Acc:AT1G21900]	390	411	447	17.8586	21.5969	21.7676	403	325	524	20.8416	18.0642	27.8065
AT1G21910	AT1G21910	Integrase-type DNA-binding superfamily protein,[Source:TAIR;Acc:AT1G21910]	152	146	242	6.9603	7.6719	11.7847	451	259	632	23.324	14.3958	33.5376
AT1G21920	AT1G21920	Histone H3 K4-specific methyltransferase SET7/9 family protein,[Source:TAIR;Acc:AT1G21920]	924	773	960	42.3111	40.6191	46.7492	1062	949	1211	54.9226	52.7474	64.2628
AT1G21930	AT1G21930	unknown protein,[Source:TAIR;Acc:AT1G21930]	135	145	130	6.1818	7.6194	6.3306	179	149	180	9.2572	8.2817	9.5519
AT1G21980	ATPIP5K1	phosphatidylinositol-4-phosphate 5-kinase 1,[Source:TAIR;Acc:AT1G21980]	642	609	647	29.3979	32.0013	31.507	585	519	654	30.254	28.8471	34.7051
AT1G22020	SHM6	serine hydroxymethyltransferase 6,[Source:TAIR;Acc:AT1G22020]	520	468	519	23.8114	24.5921	25.2738	485	413	498	25.0824	22.9554	26.4268
AT1G22030	AT1G22030	No description	90	49	29	4.1212	2.5748	1.4122	37	49	21	1.9135	2.7235	1.1144
AT1G22040	AT1G22040	Galactose oxidase/kelch repeat superfamily protein,[Source:TAIR;Acc:AT1G22040]	276	264	278	12.6384	13.8725	13.5378	195	211	279	10.0847	11.7278	14.8054
AT1G22050	MUB6	membrane-anchored ubiquitin-fold protein 6 precursor,[Source:TAIR;Acc:AT1G22050]	660	626	764	30.2222	32.8946	37.2046	795	717	910	41.1144	39.8524	48.29
AT1G22050	MUB6	membrane-anchored ubiquitin-fold protein 6 precursor,[Source:TAIR;Acc:AT1G22050]	86	86	81	3.938	4.5191	3.9445	111	112	98	5.7405	6.2252	5.2005
AT1G22065	AT1G22065	unknown protein,[Source:TAIR;Acc:AT1G22065]	20	27	44	0.9158	1.4188	2.1427	38	26	36	1.9652	1.4451	1.9104
AT1G22070	TGA3	TGA1A-related gene 3,[Source:TAIR;Acc:AT1G22070]	60	91	102	2.7475	4.7818	4.9671	106	106	112	5.4819	5.8917	5.9434
AT1G22140	AT1G22140	unknown protein,[Source:TAIR;Acc:AT1G22140]	153	129	161	7.0061	6.7786	7.8402	301	252	258	15.5666	14.0067	13.691
AT1G22160	AT1G22160	Protein of unknown function (DUF581),[Source:TAIR;Acc:AT1G22160]	12	34	23	0.5495	1.7866	1.12	32	42	26	1.6549	2.3344	1.3797
AT1G22170	AT1G22170	Phosphoglycerate mutase family protein,[Source:TAIR;Acc:AT1G22170]	78	106	99	3.5717	5.57	4.821	98	82	77	5.0682	4.5577	4.0861
AT1G22170	AT1G22170	Phosphoglycerate mutase family protein,[Source:TAIR;Acc:AT1G22170]	77	66	61	3.5259	3.4681	2.9705	65	76	42	3.3616	4.2242	2.2288
AT1G22190	AT1G22190	Integrase-type DNA-binding superfamily protein,[Source:TAIR;Acc:AT1G22190]	650	598	808	29.7643	31.4233	39.3472	620	526	655	32.064	29.2362	34.7582
AT1G22200	AT1G22200	Endoplasmic reticulum vesicle transporter protein,[Source:TAIR;Acc:AT1G22200]	268	310	279	12.272	16.2897	13.5865	310	290	334	16.032	16.1188	17.724
AT1G22220	AT1G22220	F-box family protein,[Source:TAIR;Acc:AT1G22220]	40	31	28	1.8317	1.629	1.3635	29	40	9	1.4998	2.2233	0.4776
AT1G22230	AT1G22230	unknown protein,[Source:TAIR;Acc:AT1G22230]	176	161	125	8.0593	8.4601	6.0871	68	45	30	3.5167	2.5012	1.592
AT1G22250	AT1G22250	unknown protein,[Source:TAIR;Acc:AT1G22250]	20	21	29	0.9158	1.1035	1.4122	25	20	47	1.2929	1.1116	2.4941
AT1G22270	AT1G22270	Trm112p-like protein,[Source:TAIR;Acc:AT1G22270]	393	438	487	17.9959	23.0157	23.7155	231	246	271	11.9464	13.6732	14.3809
AT1G22280	PAPP2C	phytochrome-associated protein phosphatase type 2C,[Source:TAIR;Acc:AT1G22280]	226	223	221	10.3488	11.7181	10.7621	295	251	329	15.2563	13.9511	17.4587
AT1G22300	GRF10	general regulatory factor 10,[Source:TAIR;Acc:AT1G22300]	2012	2362	2210	92.1319	124.117	107.621	2082	1852	2323	107.6731	102.9381	123.272
AT1G22310	MBD8	methyl-CPG-binding domain 8,[Source:TAIR;Acc:AT1G22310]	160	139	135	7.3266	7.3041	6.5741	168	162	222	8.6883	9.0043	11.7806
AT1G22330	AT1G22330	RNA-binding (RRM/RBD/RNP motifs) family protein,[Source:TAIR;Acc:AT1G22330]	89	55	44	4.0754	2.8901	2.1427	343	278	187	17.7387	15.4518	9.9233
AT1G22360	AtUGT85A2	UDP-glucosyl transferase 85A2,[Source:TAIR;Acc:AT1G22360]	682	773	1138	31.2296	40.6191	55.4173	1236	940	1542	63.9212	52.2472	81.8276
AT1G22370	AtUGT85A5	UDP-glucosyl transferase 85A5,[Source:TAIR;Acc:AT1G22370]	38	23	30	1.7401	1.2086	1.4609	102	86	88	5.2751	4.7801	4.6698
AT1G22400	UGT85A1	UDP-Glycosyltransferase superfamily protein,[Source:TAIR;Acc:AT1G22400]	1144	845	672	52.3851	44.4025	32.7244	560	269	512	28.9611	14.9516	27.1697
AT1G22403	AT1G22403	No description	61	40	48	2.7933	2.1019	2.3375	36	46	61	1.8618	2.5568	3.237
AT1G22410	AT1G22410	Class-II DAHP synthetase family protein,[Source:TAIR;Acc:AT1G22410]	3001	3383	3335	137.419	177.768	162.405	3410	4315	3211	176.3522	239.8368	170.3945
AT1G22430	AT1G22430	GroES-like zinc-binding dehydrogenase family protein,[Source:TAIR;Acc:AT1G22430]	450	326	307	20.606	17.1304	14.95	725	649	805	37.4942	36.0728	42.718
AT1G22440	AT1G22440	Zinc-binding alcohol dehydrogenase family protein,[Source:TAIR;Acc:AT1G22440]	197	190	162	9.0209	9.984	7.8889	228	256	162	11.7913	14.229	8.5967
AT1G22450	COX6B	cytochrome C oxidase 6B,[Source:TAIR;Acc:AT1G22450]	628	758	646	28.7569	39.8309	31.4583	953	914	1031	49.2855	50.802	54.7109
AT1G22500	AT1G22500	RING/U-box superfamily protein,[Source:TAIR;Acc:AT1G22500]	55	53	79	2.5185	2.785	3.8471	95	91	124	4.913	5.058	6.5802
AT1G22500	AT1G22500	RING/U-box superfamily protein,[Source:TAIR;Acc:AT1G22500]	249	200	299	11.402	10.5095	14.5604	338	205	349	17.4801	11.3943	18.52
AT1G22520	AT1G22520	Domain of unknown function (DUF543),[Source:TAIR;Acc:AT1G22520]	290	318	317	13.2794	16.71	15.437	213	206	199	11.0156	11.4499	10.5601
AT1G22530	PATL2	PATELLIN 2,[Source:TAIR;Acc:AT1G22530]	1592	1404	957	72.8996	73.7764	46.6031	2570	2415	1796	132.9106	134.2308	95.3063
AT1G22540	AT1G22540	Major facilitator superfamily protein,[Source:TAIR;Acc:AT1G22540]	185	146	212	8.4714	7.6719	10.3238	206	183	235	10.6535	10.1715	12.4705
AT1G22550	AT1G22550	Major facilitator superfamily protein,[Source:TAIR;Acc:AT1G22550]	174	124	121	7.9677	6.5159	5.8924	230	209	141	11.8947	11.6167	7.4823
AT1G22570	AT1G22570	Major facilitator superfamily protein,[Source:TAIR;Acc:AT1G22570]	81	87	77	3.7091	4.5716	3.7497	66	42	98	3.4133	2.3344	5.2005
AT1G22590	AGL87	AGAMOUS-like 87,[Source:TAIR;Acc:AT1G22590]	217	235	125	9.9367	12.3486	6.0871	248	267	161	12.8256	14.8404	8.5436
AT1G22600	AT1G22600	Late embryogenesis abundant protein (LEA) family protein,[Source:TAIR;Acc:AT1G22600]	43	15	16	1.969	0.7882	0.7792	9	8	10	0.4654	0.4447	0.5307
AT1G22610	AT1G22610	C2 calcium/lipid-binding plant phosphoribosyltransferase family protein,[Source:TAIR;Acc:AT1G22610]	1413	1350	1352	64.7029	70.9389	65.8384	1605	1183	1666	83.0045	65.7536	88.4078
AT1G22620	ATSAC1	Phosphoinositide phosphatase family protein,[Source:TAIR;Acc:AT1G22620]	246	201	214	11.2646	10.562	10.4212	290	319	363	14.9977	17.7307	19.2629
AT1G22630	AT1G22630	unknown protein,[Source:TAIR;Acc:AT1G22630]	309	276	244	14.1495	14.5031	11.8821	494	499	458	25.5478	27.7355	24.3042
AT1G22640	ATMYB3	myb domain protein 3,[Source:TAIR;Acc:AT1G22640]	330	330	528	15.1111	17.3406	25.7121	428	326	374	22.1345	18.1198	19.8466
AT1G22650	AT1G22650	Plant neutral invertase family protein,[Source:TAIR;Acc:AT1G22650]	101	99	125	4.6249	5.2022	6.0871	119	152	131	6.1542	8.4485	6.9516
AT1G22660	AT1G22660	Polynucleotide adenylyltransferase family protein,[Source:TAIR;Acc:AT1G22660]	127	106	123	5.8155	5.57	5.9897	124	132	212	6.4128	7.3368	11.25
AT1G22690	AT1G22690	Gibberellin-regulated family protein,[Source:TAIR;Acc:AT1G22690]	919	951	803	42.0821	49.9725	39.1038	1478	1423	1703	76.4365	79.0933	90.3712
AT1G22690	AT1G22690	Gibberellin-regulated family protein,[Source:TAIR;Acc:AT1G22690]	205	226	194	9.3872	11.8757	9.4472	1337	954	806	69.1446	53.0253	42.7711
AT1G22710	SUC2	sucrose-proton symporter 2,[Source:TAIR;Acc:AT1G22710]	2069	1667	1375	94.742	87.5964	66.9585	2270	2424	1375	117.3958	134.731	72.9656
AT1G22730	AT1G22730	MA3 domain-containing protein,[Source:TAIR;Acc:AT1G22730]	850	752	768	38.9225	39.5156	37.3994	519	394	625	26.8407	21.8994	33.1662
AT1G22740	RAB7	RAB GTPase homolog G3B,[Source:TAIR;Acc:AT1G22740]	31	25	21	1.4195	1.3137	1.0226	90	97	58	4.6545	5.3915	3.0778
AT1G22750	AT1G22750	unknown protein,[Source:TAIR;Acc:AT1G22750]	205	191	187	9.3872	10.0365	9.1064	600	567	550	31.0297	31.5151	29.1862
AT1G22770	GI	gigantea protein (GI),[Source:TAIR;Acc:AT1G22770]	823	744	741	37.6861	39.0952	36.0845	372	284	388	19.2384	15.7853	20.5896
AT1G22780	PFL	Ribosomal protein S13/S18 family,[Source:TAIR;Acc:AT1G22780]	1656	1766	1415	75.8302	92.7986	68.9064	1628	1538	1789	84.194	85.4853	94.9349
AT1G22790	AT1G22790	unknown protein,[Source:TAIR;Acc:AT1G22790]	288	259	264	13.1879	13.6098	12.856	244	212	278	12.6188	11.7834	14.7523
AT1G22800	AT1G22800	S-adenosyl-L-methionine-dependent methyltransferases superfamily protein,[Source:TAIR;Acc:AT1G22800]	97	97	137	4.4417	5.0971	6.6715	140	133	169	7.2403	7.3924	8.9681
AT1G22830	AT1G22830	Tetratricopeptide repeat (TPR)-like superfamily protein,[Source:TAIR;Acc:AT1G22830]	70	63	62	3.2054	3.3105	3.0192	46	39	52	2.3789	2.1677	2.7594
AT1G22840	CYTC-1	CYTOCHROME C-1,[Source:TAIR;Acc:AT1G22840]	1476	1670	1586	67.5878	87.754	77.2336	1428	1263	1859	73.8507	70.2002	98.6495
AT1G22840	CYTC-1	CYTOCHROME C-1,[Source:TAIR;Acc:AT1G22840]	1680	1185	1569	76.9292	62.2686	76.4057	2938	3077	2505	151.9422	171.0262	132.93
AT1G22860	AT1G22860	Vacuolar sorting protein 39,[Source:TAIR;Acc:AT1G22860]	231	159	221	10.5778	8.355	10.7621	300	277	276	15.5149	15.3962	14.6462
AT1G22870	AT1G22870	Protein kinase family protein with ARM repeat domain,[Source:TAIR;Acc:AT1G22870]	153	113	149	7.0061	5.9379	7.2559	250	237	281	12.9291	13.173	14.9115
AT1G22880	ATGH9B4	cellulase 5,[Source:TAIR;Acc:AT1G22880]	230	169	158	10.532	8.8805	7.6941	223	182	213	11.5327	10.1159	11.303
AT1G22882	AT1G22882	Galactose-binding protein,[Source:TAIR;Acc:AT1G22882]	628	581	507	28.7569	30.53	24.6894	847	512	687	43.8036	28.458	36.4563
AT1G22885	AT1G22885	unknown protein,[Source:TAIR;Acc:AT1G22885]	102	120	106	4.6707	6.3057	5.1619	183	169	189	9.4641	9.3934	10.0295
AT1G22890	AT1G22890	unknown protein,[Source:TAIR;Acc:AT1G22890]	149	96	233	6.8229	5.0445	11.3464	231	159	235	11.9464	8.8376	12.4705
AT1G22900	AT1G22900	Disease resistance-responsive (dirigent-like protein) family protein,[Source:TAIR;Acc:AT1G22900]	126	109	181	5.7697	5.7277	8.8142	41	69	25	2.1204	3.8352	1.3266
AT1G22910	AT1G22910	RNA-binding (RRM/RBD/RNP motifs) family protein,[Source:TAIR;Acc:AT1G22910]	206	170	195	9.433	8.933	9.4959	317	351	315	16.394	19.5093	16.7158
AT1G22920	CSN5A	COP9 signalosome 5A,[Source:TAIR;Acc:AT1G22920]	286	290	293	13.0963	15.2387	14.2682	407	355	390	21.0485	19.7316	20.6957
AT1G22930	AT1G22930	T-complex protein 11,[Source:TAIR;Acc:AT1G22930]	2506	2320	2576	114.753	121.91	125.444	2834	2369	2537	146.5637	131.674	134.6281
AT1G22940	TH1	thiamin biosynthesis protein, putative,[Source:TAIR;Acc:AT1G22940]	195	184	201	8.9293	9.6687	9.7881	132	140	153	6.8265	7.7815	8.1191
AT1G22940	TH1	thiamin biosynthesis protein, putative,[Source:TAIR;Acc:AT1G22940]	348	245	290	15.9353	12.8741	14.1222	268	252	284	13.8599	14.0067	15.0707
AT1G22960	AT1G22960	Pentatricopeptide repeat (PPR) superfamily protein,[Source:TAIR;Acc:AT1G22960]	201	150	163	9.204	7.8821	7.9376	119	97	171	6.1542	5.3915	9.0743
AT1G22970	AT1G22970	unknown protein,[Source:TAIR;Acc:AT1G22970]	247	258	233	11.3104	13.5572	11.3464	165	175	158	8.5332	9.7269	8.3844
AT1G22980	AT1G22980	unknown protein,[Source:TAIR;Acc:AT1G22980]	11	18	34	0.5037	0.9459	1.6557	5	10	27	0.2586	0.5558	1.4328
AT1G22985	AT1G22985	Integrase-type DNA-binding superfamily protein,[Source:TAIR;Acc:AT1G22985]	64	32	42	2.9306	1.6815	2.0453	53	44	58	2.741	2.4456	3.0778
AT1G22990	AT1G22990	Heavy metal transport/detoxification superfamily protein,[Source:TAIR;Acc:AT1G22990]	24	8	22	1.099	0.4204	1.0713	41	24	20	2.1204	1.334	1.0613
AT1G23000	AT1G23000	Heavy metal transport/detoxification superfamily protein,[Source:TAIR;Acc:AT1G23000]	114	79	84	5.2202	4.1512	4.0906	26	32	26	1.3446	1.7786	1.3797
AT1G23010	LPR1	Cupredoxin superfamily protein,[Source:TAIR;Acc:AT1G23010]	247	168	127	11.3104	8.828	6.1845	50	56	57	2.5858	3.1126	3.0248
AT1G23020	FRO3	ferric reduction oxidase 3,[Source:TAIR;Acc:AT1G23020]	1160	1272	1805	53.1178	66.8402	87.8982	1452	1261	1065	75.0919	70.089	56.5152
AT1G23030	AT1G23030	ARM repeat superfamily protein,[Source:TAIR;Acc:AT1G23030]	769	826	1002	35.2134	43.4041	48.7945	1442	1114	1490	74.5748	61.9185	79.0682
AT1G23040	AT1G23040	hydroxyproline-rich glycoprotein family protein,[Source:TAIR;Acc:AT1G23040]	437	297	436	20.0107	15.6066	21.2319	211	197	134	10.9121	10.9497	7.1108
AT1G23052	AT1G23052	No description	74	66	106	3.3886	3.4681	5.1619	117	91	118	6.0508	5.058	6.2618
AT1G23052	AT1G23052	No description	74	66	106	3.3886	3.4681	5.1619	117	91	118	6.0508	5.058	6.2618
AT1G23060	AT1G23060	No description	12	19	21	0.5495	0.9984	1.0226	21	10	9	1.086	0.5558	0.4776
AT1G23080	PIN7	Auxin efflux carrier family protein,[Source:TAIR;Acc:AT1G23080]	568	518	643	26.0094	27.2195	31.3122	792	901	881	40.9592	50.0795	46.751
AT1G23090	AST91	sulfate transporter 91,[Source:TAIR;Acc:AT1G23090]	704	523	459	32.237	27.4822	22.352	376	223	381	19.4453	12.3948	20.2181
AT1G23100	AT1G23100	GroES-like family protein,[Source:TAIR;Acc:AT1G23100]	39	53	53	1.7859	2.785	2.581	38	43	66	1.9652	2.39	3.5023
AT1G23120	AT1G23120	Polyketide cyclase/dehydrase and lipid transport superfamily protein,[Source:TAIR;Acc:AT1G23120]	100	83	88	4.5791	4.3614	4.2853	125	61	84	6.4645	3.3905	4.4575
AT1G23130	AT1G23130	Polyketide cyclase/dehydrase and lipid transport superfamily protein,[Source:TAIR;Acc:AT1G23130]	2481	1629	2602	113.608	85.5996	126.71	907	1943	1476	46.9066	107.996	78.3252
AT1G23140	AT1G23140	Calcium-dependent lipid-binding (CaLB domain) family protein,[Source:TAIR;Acc:AT1G23140]	36	47	45	1.6485	2.4697	2.1914	36	37	37	1.8618	2.0565	1.9634
AT1G23170	AT1G23170	Protein of unknown function DUF2359, transmembrane,[Source:TAIR;Acc:AT1G23170]	536	489	470	24.5441	25.6956	22.8876	566	460	841	29.2714	25.5678	44.6284
AT1G23170	AT1G23170	Protein of unknown function DUF2359, transmembrane,[Source:TAIR;Acc:AT1G23170]	90	70	58	4.1212	3.6783	2.8244	50	59	50	2.5858	3.2793	2.6533
AT1G23190	AT1G23190	Phosphoglucomutase/phosphomannomutase family protein,[Source:TAIR;Acc:AT1G23190]	692	710	857	31.6875	37.3086	41.7334	1367	1333	1929	70.696	74.091	102.3641
AT1G23200	AT1G23200	Plant invertase/pectin methylesterase inhibitor superfamily,[Source:TAIR;Acc:AT1G23200]	28	21	21	1.2822	1.1035	1.0226	69	46	42	3.5684	2.5568	2.2288
AT1G23205	AT1G23205	Plant invertase/pectin methylesterase inhibitor superfamily protein,[Source:TAIR;Acc:AT1G23205]	640	570	536	29.3064	29.952	26.1016	443	298	264	22.9103	16.5635	14.0094
AT1G23220	AT1G23220	Dynein light chain type 1 family protein,[Source:TAIR;Acc:AT1G23220]	259	251	280	11.8599	13.1894	13.6352	217	211	218	11.2224	11.7278	11.5684
AT1G23230	AT1G23230	No description	557	480	600	25.5057	25.2227	29.2182	555	554	660	28.7025	30.7925	35.0235
AT1G23260	MMZ1	MMS ZWEI homologue 1,[Source:TAIR;Acc:AT1G23260]	143	147	155	6.5481	7.7245	7.5481	379	329	418	19.6004	18.2865	22.1815
AT1G23280	AT1G23280	MAK16 protein-related,[Source:TAIR;Acc:AT1G23280]	415	490	452	19.0033	25.7482	22.0111	262	241	368	13.5496	13.3953	19.5282
AT1G23290	RPL27A	Ribosomal protein L18e/L15 superfamily protein,[Source:TAIR;Acc:AT1G23290]	3941	4030	3630	180.463	211.766	176.77	3019	2799	3480	156.1312	155.5743	184.6693
AT1G23310	GGT1	glutamate:glyoxylate aminotransferase,[Source:TAIR;Acc:AT1G23310]	16003	12977	14935	732.796	681.907	727.291	44415	39548	36683	2296.9751	2198.1613	1946.6157
AT1G23330	AT1G23330	alpha/beta-Hydrolases superfamily protein,[Source:TAIR;Acc:AT1G23330]	275	225	244	12.5926	11.8231	11.8821	259	234	253	13.3945	13.0062	13.4257
AT1G23340	AT1G23340	Protein of Unknown Function (DUF239),[Source:TAIR;Acc:AT1G23340]	57	33	15	2.6101	1.7341	0.7305	49	72	20	2.5341	4.0019	1.0613
AT1G23360	MENG	S-adenosyl-L-methionine-dependent methyltransferases superfamily protein,[Source:TAIR;Acc:AT1G23360]	84	84	68	3.8465	4.414	3.3114	134	169	203	6.93	9.3934	10.7724
AT1G23380	KNAT6	KNOTTED1-like homeobox gene 6,[Source:TAIR;Acc:AT1G23380]	125	94	182	5.7239	4.9395	8.8629	111	79	105	5.7405	4.391	5.5719
AT1G23390	AT1G23390	Kelch repeat-containing F-box family protein,[Source:TAIR;Acc:AT1G23390]	2343	2798	6529	107.289	147.027	317.943	3725	3424	3835	192.6429	190.3131	203.5077
AT1G23400	CAF2	RNA-binding CRS1 / YhbY (CRM) domain-containing protein,[Source:TAIR;Acc:AT1G23400]	788	711	844	36.0835	37.3611	41.1003	1350	1379	1570	69.8169	76.6477	83.3134
AT1G23410	AT1G23410	Ribosomal protein S27a / Ubiquitin family protein,[Source:TAIR;Acc:AT1G23410]	260	313	209	11.9057	16.4473	10.1777	82	63	88	4.2407	3.5017	4.6698
AT1G23440	AT1G23440	Peptidase C15, pyroglutamyl peptidase I-like,[Source:TAIR;Acc:AT1G23440]	609	558	493	27.8868	29.3214	24.0077	717	614	674	37.0805	34.1274	35.7664
AT1G23460	AT1G23460	Pectin lyase-like superfamily protein,[Source:TAIR;Acc:AT1G23460]	97	110	106	4.4417	5.7802	5.1619	151	114	98	7.8091	6.3364	5.2005
AT1G23480	ATCSLA03	cellulose synthase-like A3,[Source:TAIR;Acc:AT1G23480]	182	176	146	8.334	9.2483	7.1098	795	788	616	41.1144	43.7987	32.6886
AT1G23490	ATARFA1A	ADP-ribosylation factor 1,[Source:TAIR;Acc:AT1G23490]	765	745	805	35.0303	39.1477	39.2011	1783	1708	2197	92.21	94.9342	116.5857
AT1G23530	AT1G23530	unknown protein,[Source:TAIR;Acc:AT1G23530]	84	81	78	3.8465	4.2563	3.7984	51	29	45	2.6375	1.6119	2.388
AT1G23550	SRO2	similar to RCD one 2,[Source:TAIR;Acc:AT1G23550]	126	122	147	5.7697	6.4108	7.1585	78	57	96	4.0339	3.1682	5.0943
AT1G23550	SRO2	similar to RCD one 2,[Source:TAIR;Acc:AT1G23550]	58	55	76	2.6559	2.8901	3.701	39	31	37	2.0169	1.723	1.9634
AT1G23710	AT1G23710	Protein of unknown function (DUF1645),[Source:TAIR;Acc:AT1G23710]	172	171	204	7.8761	8.9856	9.9342	241	154	230	12.4636	8.5596	12.2052
AT1G23720	AT1G23720	Proline-rich extensin-like family protein,[Source:TAIR;Acc:AT1G23720]	4642	3262	3278	212.563	171.409	159.629	6923	6301	2665	358.0313	350.2229	141.4206
AT1G23730	ATBCA3	beta carbonic anhydrase 3,[Source:TAIR;Acc:AT1G23730]	85	86	72	3.8923	4.5191	3.5062	8	23	32	0.4137	1.2784	1.6981
AT1G23730	ATBCA3	beta carbonic anhydrase 3,[Source:TAIR;Acc:AT1G23730]	3783	2848	3517	173.228	149.655	171.268	6174	5974	4990	319.2958	332.0475	264.7987
AT1G23750	AT1G23750	Nucleic acid-binding, OB-fold-like protein,[Source:TAIR;Acc:AT1G23750]	80	98	105	3.6633	5.1496	5.1132	113	124	112	5.8439	6.8922	5.9434
AT1G23760	JP630	BURP domain-containing protein,[Source:TAIR;Acc:AT1G23760]	65	55	58	2.9764	2.8901	2.8244	64	61	29	3.3098	3.3905	1.5389
AT1G23780	AT1G23780	F-box family protein,[Source:TAIR;Acc:AT1G23780]	680	655	674	31.138	34.4185	32.8218	511	473	564	26.427	26.2903	29.9292
AT1G23790	AT1G23790	Plant protein of unknown function (DUF936),[Source:TAIR;Acc:AT1G23790]	82	72	51	3.7549	3.7834	2.4836	21	52	24	1.086	2.8903	1.2736
AT1G23800	ALDH2B7	aldehyde dehydrogenase 2B7,[Source:TAIR;Acc:AT1G23800]	190	169	205	8.7003	8.8805	9.9829	328	236	193	16.9629	13.1174	10.2417
AT1G23820	SPDS1	spermidine synthase 1,[Source:TAIR;Acc:AT1G23820]	659	580	605	30.1764	30.4774	29.4617	885	804	1059	45.7688	44.688	56.1968
AT1G23820	SPDS1	spermidine synthase 1,[Source:TAIR;Acc:AT1G23820]	53	54	70	2.4269	2.8376	3.4088	58	43	52	2.9995	2.39	2.7594
AT1G23850	AT1G23850	unknown protein,[Source:TAIR;Acc:AT1G23850]	74	70	81	3.3886	3.6783	3.9445	70	46	29	3.6201	2.5568	1.5389
AT1G23860	RSZP21	RS-containing zinc finger protein 21,[Source:TAIR;Acc:AT1G23860]	491	402	414	22.4835	21.124	20.1606	384	380	435	19.859	21.1212	23.0837
AT1G23870	ATTPS9	trehalose-phosphatase/synthase 9,[Source:TAIR;Acc:AT1G23870]	1081	1018	1296	49.5003	53.4932	63.1114	2074	1735	1983	107.2594	96.435	105.2296
AT1G23880	AT1G23880	NHL domain-containing protein,[Source:TAIR;Acc:AT1G23880]	113	114	151	5.1744	5.9904	7.3533	111	99	135	5.7405	5.5026	7.1639
AT1G23890	AT1G23890	NHL domain-containing protein,[Source:TAIR;Acc:AT1G23890]	76	63	85	3.4801	3.3105	4.1393	112	90	115	5.7922	5.0024	6.1026
AT1G23900	GAMMA-ADAPTIN 1	gamma-adaptin 1,[Source:TAIR;Acc:AT1G23900]	516	496	522	23.6283	26.0635	25.4199	614	566	727	31.7537	31.4595	38.5789
AT1G23950	AT1G23950	Protein of unknown function (DUF626),[Source:TAIR;Acc:AT1G23950]	426	425	498	19.507	22.3326	24.2511	415	353	553	21.4622	19.6205	29.3454
AT1G23960	AT1G23960	Protein of unknown function (DUF626),[Source:TAIR;Acc:AT1G23960]	323	318	328	14.7906	16.71	15.9726	529	384	685	27.3579	21.3435	36.3501
AT1G23970	AT1G23970	Protein of unknown function (DUF626),[Source:TAIR;Acc:AT1G23970]	111	102	134	5.0828	5.3598	6.5254	176	157	225	9.1021	8.7264	11.9398
AT1G23980	AT1G23980	RING/U-box superfamily protein,[Source:TAIR;Acc:AT1G23980]	94	83	71	4.3044	4.3614	3.4575	56	48	42	2.8961	2.6679	2.2288
AT1G24020	MLP423	MLP-like protein 423,[Source:TAIR;Acc:AT1G24020]	921	556	467	42.1737	29.2163	22.7415	372	388	351	19.2384	21.5659	18.6261
AT1G24030	AT1G24030	Protein kinase superfamily protein,[Source:TAIR;Acc:AT1G24030]	83	89	64	3.8007	4.6767	3.1166	101	99	112	5.2233	5.5026	5.9434
AT1G24030	AT1G24030	Protein kinase superfamily protein,[Source:TAIR;Acc:AT1G24030]	378	344	337	17.3091	18.0763	16.4109	378	356	393	19.5487	19.7872	20.8549
AT1G24050	AT1G24050	RNA-processing, Lsm domain,[Source:TAIR;Acc:AT1G24050]	777	743	768	35.5797	39.0427	37.3994	551	516	639	28.4956	28.6804	33.9091
AT1G24090	AT1G24090	RNase H family protein,[Source:TAIR;Acc:AT1G24090]	20	22	14	0.9158	1.156	0.6818	11	19	26	0.5689	1.0561	1.3797
AT1G24095	AT1G24095	Putative thiol-disulphide oxidoreductase DCC,[Source:TAIR;Acc:AT1G24095]	70	100	110	3.2054	5.2547	5.3567	50	40	104	2.5858	2.2233	5.5189
AT1G24100	UGT74B1	UDP-glucosyl transferase 74B1,[Source:TAIR;Acc:AT1G24100]	1386	1338	1072	63.4666	70.3083	52.2033	650	722	532	33.6155	40.1303	28.231
AT1G24120	ARL1	ARG1-like 1,[Source:TAIR;Acc:AT1G24120]	146	161	137	6.6855	8.4601	6.6715	244	233	239	12.6188	12.9506	12.6827
AT1G24130	AT1G24130	Transducin/WD40 repeat-like superfamily protein,[Source:TAIR;Acc:AT1G24130]	15	21	6	0.6869	1.1035	0.2922	18	21	1	0.9309	1.1672	0.0531
AT1G24148	AT1G24148	unknown protein,[Source:TAIR;Acc:AT1G24148]	48	40	47	2.198	2.1019	2.2888	47	54	29	2.4307	3.0014	1.5389
AT1G24150	ATFH4	formin homologue 4,[Source:TAIR;Acc:AT1G24150]	160	130	225	7.3266	6.8312	10.9568	225	192	241	11.6361	10.6718	12.7889
AT1G24160	AT1G24160	unknown protein,[Source:TAIR;Acc:AT1G24160]	721	753	968	33.0154	39.5681	47.1388	1037	769	1195	53.6297	42.7426	63.4137
AT1G24170	GATL8	Nucleotide-diphospho-sugar transferases superfamily protein,[Source:TAIR;Acc:AT1G24170]	690	593	503	31.5959	31.1606	24.4946	1243	991	1081	64.2832	55.0819	57.3642
AT1G24180	IAR4	Thiamin diphosphate-binding fold (THDP-binding) superfamily protein,[Source:TAIR;Acc:AT1G24180]	1571	1421	1321	71.9379	74.6697	64.3288	1315	1126	1352	68.0068	62.5855	71.7451
AT1G24190	SNL3	SIN3-like 3,[Source:TAIR;Acc:AT1G24190]	573	615	595	26.2383	32.3166	28.9748	841	672	902	43.4933	37.3512	47.8654
AT1G24240	AT1G24240	Ribosomal protein L19 family protein,[Source:TAIR;Acc:AT1G24240]	54	49	44	2.4727	2.5748	2.1427	54	40	50	2.7927	2.2233	2.6533
AT1G24260	2003-09-01	K-box region and MADS-box transcription factor family protein,[Source:TAIR;Acc:AT1G24260]	66	50	53	3.0222	2.6274	2.581	16	17	14	0.8275	0.9449	0.7429
AT1G24265	AT1G24265	Protein of unknown function (DUF1664),[Source:TAIR;Acc:AT1G24265]	19	30	22	0.87	1.5764	1.0713	23	29	46	1.1895	1.6119	2.441
AT1G24267	AT1G24267	Protein of unknown function (DUF1664),[Source:TAIR;Acc:AT1G24267]	266	270	273	12.1805	14.1878	13.2943	357	349	410	18.4627	19.3982	21.757
AT1G24280	G6PD3	glucose-6-phosphate dehydrogenase 3,[Source:TAIR;Acc:AT1G24280]	279	454	289	12.7757	23.8565	14.0735	195	221	181	10.0847	12.2836	9.6049
AT1G24280	G6PD3	glucose-6-phosphate dehydrogenase 3,[Source:TAIR;Acc:AT1G24280]	114	87	104	5.2202	4.5716	5.0645	108	91	93	5.5853	5.058	4.9351
AT1G24300	AT1G24300	GYF domain-containing protein,[Source:TAIR;Acc:AT1G24300]	990	926	857	45.3333	48.6588	41.7334	827	746	838	42.7693	41.4643	44.4692
AT1G24310	AT1G24310	unknown protein,[Source:TAIR;Acc:AT1G24310]	275	272	240	12.5926	14.2929	11.6873	252	236	291	13.0325	13.1174	15.4422
AT1G24310	AT1G24310	unknown protein,[Source:TAIR;Acc:AT1G24310]	30	49	27	1.3737	2.5748	1.3148	44	75	39	2.2755	4.1687	2.0696
AT1G24330	AT1G24330	ARM repeat superfamily protein,[Source:TAIR;Acc:AT1G24330]	54	37	32	2.4727	1.9443	1.5583	32	39	29	1.6549	2.1677	1.5389
AT1G24340	EMB260	FAD/NAD(P)-binding oxidoreductase family protein,[Source:TAIR;Acc:AT1G24340]	581	461	593	26.6047	24.2243	28.8774	680	569	731	35.167	31.6262	38.7912
AT1G24340	EMB260	FAD/NAD(P)-binding oxidoreductase family protein,[Source:TAIR;Acc:AT1G24340]	434	428	469	19.8734	22.4903	22.8389	593	519	604	30.6677	28.8471	32.0518
AT1G24350	AT1G24350	Acid phosphatase/vanadium-dependent haloperoxidase-related protein,[Source:TAIR;Acc:AT1G24350]	604	659	599	27.6579	34.6287	29.1695	1234	1189	1298	63.8178	66.0871	68.8795
AT1G24400	LHT2	lysine histidine transporter 2,[Source:TAIR;Acc:AT1G24400]	25	17	25	1.1448	0.8933	1.2174	34	32	31	1.7584	1.7786	1.645
AT1G24430	AT1G24430	HXXXD-type acyl-transferase family protein,[Source:TAIR;Acc:AT1G24430]	46	44	22	2.1064	2.3121	1.0713	35	52	29	1.8101	2.8903	1.5389
AT1G24440	AT1G24440	RING/U-box superfamily protein,[Source:TAIR;Acc:AT1G24440]	174	155	173	7.9677	8.1448	8.4246	264	228	241	13.6531	12.6727	12.7889
AT1G24450	NFD2	Ribonuclease III family protein,[Source:TAIR;Acc:AT1G24450]	92	92	107	4.2128	4.8344	5.2106	98	90	124	5.0682	5.0024	6.5802
AT1G24460	AT1G24460	unknown protein,[Source:TAIR;Acc:AT1G24460]	982	929	1011	44.9669	48.8165	49.2327	883	787	911	45.6654	43.7431	48.343
AT1G24490	ALB4	OxaA/YidC-like membrane insertion protein,[Source:TAIR;Acc:AT1G24490]	622	661	599	28.4821	34.7338	29.1695	511	532	633	26.427	29.5697	33.5907
AT1G24490	ALB4	OxaA/YidC-like membrane insertion protein,[Source:TAIR;Acc:AT1G24490]	2106	2316	2078	96.4362	121.7	101.193	1965	1779	2195	101.6223	98.8806	116.4796
AT1G24530	AT1G24530	Transducin/WD40 repeat-like superfamily protein,[Source:TAIR;Acc:AT1G24530]	658	606	739	30.1306	31.8437	35.9871	439	219	659	22.7034	12.1725	34.9704
AT1G24560	AT1G24560	unknown protein,[Source:TAIR;Acc:AT1G24560]	727	625	711	33.2902	32.8421	34.6236	637	588	672	32.9432	32.6823	35.6603
AT1G24575	AT1G24575	unknown protein,[Source:TAIR;Acc:AT1G24575]	42	36	67	1.9232	1.8917	3.2627	26	29	32	1.3446	1.6119	1.6981
AT1G24577	AT1G24577	unknown protein,[Source:TAIR;Acc:AT1G24577]	19	24	18	0.87	1.2611	0.8765	38	26	26	1.9652	1.4451	1.3797
AT1G24580	AT1G24580	RING/U-box superfamily protein,[Source:TAIR;Acc:AT1G24580]	219	221	224	10.0283	11.613	10.9081	93	64	27	4.8096	3.5573	1.4328
AT1G24600	AT1G24600	unknown protein,[Source:TAIR;Acc:AT1G24600]	23	19	12	1.0532	0.9984	0.5844	19	19	27	0.9826	1.0561	1.4328
AT1G24600	AT1G24600	unknown protein,[Source:TAIR;Acc:AT1G24600]	388	413	378	17.767	21.702	18.4075	610	504	691	31.5469	28.0134	36.6685
AT1G24625	ZFP7	zinc finger protein 7,[Source:TAIR;Acc:AT1G24625]	111	139	145	5.0828	7.3041	7.0611	183	172	131	9.4641	9.5601	6.9516
AT1G24706	THO2	THO2,[Source:TAIR;Acc:AT1G24706]	829	822	797	37.9609	43.1939	38.8116	943	895	1033	48.7684	49.746	54.8171
AT1G24735	AT1G24735	S-adenosyl-L-methionine-dependent methyltransferases superfamily protein,[Source:TAIR;Acc:AT1G24735]	281	274	260	12.8673	14.398	12.6612	309	298	311	15.9803	16.5635	16.5035
AT1G24793	AT1G24793	UDP-3-O-acyl N-acetylglycosamine deacetylase family protein,[Source:TAIR;Acc:AT1G24793]	51	31	39	2.3354	1.629	1.8992	62	50	87	3.2064	2.7791	4.6167
AT1G24800	AT1G24800	F-box family protein,[Source:TAIR;Acc:AT1G24800]	505	458	445	23.1245	24.0667	21.6702	361	316	351	18.6695	17.5639	18.6261
AT1G24822	AT1G24822	unknown protein,[Source:TAIR;Acc:AT1G24822]	527	428	417	24.132	22.4903	20.3067	1064	832	1394	55.026	46.2443	73.9738
AT1G24822	AT1G24822	unknown protein,[Source:TAIR;Acc:AT1G24822]	469	379	351	21.4761	19.9154	17.0927	982	749	1273	50.7853	41.631	67.5529
AT1G25054	AT1G25054	UDP-3-O-acyl N-acetylglycosamine deacetylase family protein,[Source:TAIR;Acc:AT1G25054]	555	375	411	25.4141	19.7052	20.0145	1052	862	1287	54.4054	47.9118	68.2958
AT1G25054	AT1G25054	UDP-3-O-acyl N-acetylglycosamine deacetylase family protein,[Source:TAIR;Acc:AT1G25054]	319	202	213	14.6074	10.6146	10.3725	625	524	735	32.3226	29.125	39.0034
AT1G25097	AT1G25097	unknown protein,[Source:TAIR;Acc:AT1G25097]	448	372	314	20.5145	19.5476	15.2909	918	757	1201	47.4755	42.0757	63.7321
AT1G25097	AT1G25097	unknown protein,[Source:TAIR;Acc:AT1G25097]	427	362	300	19.5528	19.0221	14.6091	873	715	1142	45.1482	39.7412	60.6012
AT1G25145	AT1G25145	UDP-3-O-acyl N-acetylglycosamine deacetylase family protein,[Source:TAIR;Acc:AT1G25145]	45	41	41	2.0606	2.1544	1.9966	47	55	66	2.4307	3.057	3.5023
AT1G25150	AT1G25150	F-box family protein,[Source:TAIR;Acc:AT1G25150]	552	475	464	25.2767	24.96	22.5954	338	301	374	17.4801	16.7302	19.8466
AT1G25175	AT1G25175	other RNA,[Source:TAIR;Acc:AT1G25175]	499	356	312	22.8498	18.7068	15.1935	968	752	1163	50.0613	41.7977	61.7156
AT1G25210	AT1G25210	UDP-3-O-acyl N-acetylglycosamine deacetylase family protein,[Source:TAIR;Acc:AT1G25210]	49	36	30	2.2438	1.8917	1.4609	53	76	82	2.741	4.2242	4.3514
AT1G25230	AT1G25230	Calcineurin-like metallo-phosphoesterase superfamily protein,[Source:TAIR;Acc:AT1G25230]	166	177	237	7.6013	9.3009	11.5412	570	393	608	29.4782	21.8438	32.2641
AT1G25260	AT1G25260	Ribosomal protein L10 family protein,[Source:TAIR;Acc:AT1G25260]	517	537	508	23.674	28.2179	24.7381	524	460	601	27.0993	25.5678	31.8926
AT1G25275	AT1G25275	unknown protein,[Source:TAIR;Acc:AT1G25275]	728	636	890	33.336	33.4201	43.3404	570	507	974	29.4782	28.1801	51.6862
AT1G25280	AtTLP10	tubby like protein 10,[Source:TAIR;Acc:AT1G25280]	739	648	764	33.8397	34.0507	37.2046	814	717	720	42.097	39.8524	38.2074
AT1G25290	RBL10	RHOMBOID-like protein 10,[Source:TAIR;Acc:AT1G25290]	89	99	77	4.0754	5.2022	3.7497	131	151	151	6.7748	8.3929	8.0129
AT1G25320	AT1G25320	Leucine-rich repeat protein kinase family protein,[Source:TAIR;Acc:AT1G25320]	43	36	69	1.969	1.8917	3.3601	69	59	81	3.5684	3.2793	4.2983
AT1G25350	OVA9	glutamine-tRNA ligase, putative / glutaminyl-tRNA synthetase, putative / GlnRS, putative,[Source:TAIR;Acc:AT1G25350]	615	597	585	28.1616	31.3707	28.4878	886	814	1006	45.8206	45.2438	53.3843
AT1G25360	AT1G25360	Pentatricopeptide repeat (PPR) superfamily protein,[Source:TAIR;Acc:AT1G25360]	70	78	67	3.2054	4.0987	3.2627	10	20	25	0.5172	1.1116	1.3266
AT1G25370	AT1G25370	Protein of unknown function (DUF1639),[Source:TAIR;Acc:AT1G25370]	78	66	96	3.5717	3.4681	4.6749	70	47	92	3.6201	2.6124	4.8821
AT1G25375	AT1G25375	Metallo-hydrolase/oxidoreductase superfamily protein,[Source:TAIR;Acc:AT1G25375]	73	52	74	3.3428	2.7325	3.6036	72	81	116	3.7236	4.5022	6.1556
AT1G25380	ATNDT2	NAD+ transporter 2,[Source:TAIR;Acc:AT1G25380]	443	417	425	20.2855	21.9122	20.6963	294	269	325	15.2046	14.9516	17.2464
AT1G25390	AT1G25390	Protein kinase superfamily protein,[Source:TAIR;Acc:AT1G25390]	260	258	303	11.9057	13.5572	14.7552	274	263	205	14.1702	14.6181	10.8785
AT1G25400	AT1G25400	unknown protein,[Source:TAIR;Acc:AT1G25400]	124	161	217	5.6781	8.4601	10.5673	69	54	68	3.5684	3.0014	3.6085
AT1G25420	AT1G25420	Regulator of Vps4 activity in the MVB pathway protein,[Source:TAIR;Acc:AT1G25420]	305	232	287	13.9663	12.191	13.9761	329	325	368	17.0146	18.0642	19.5282
AT1G25425	CLE43	CLAVATA3/ESR-RELATED 43,[Source:TAIR;Acc:AT1G25425]	15	25	37	0.6869	1.3137	1.8018	23	26	21	1.1895	1.4451	1.1144
AT1G25440	AT1G25440	B-box type zinc finger protein with CCT domain,[Source:TAIR;Acc:AT1G25440]	1613	1705	1685	73.8612	89.5932	82.0546	2283	1941	1536	118.0681	107.8849	81.5092
AT1G25450	KCS5	3-ketoacyl-CoA synthase 5,[Source:TAIR;Acc:AT1G25450]	370	359	299	16.9427	18.8645	14.5604	622	501	552	32.1675	27.8466	29.2924
AT1G25470	AT1G25470	AP2 domain-containing transcription factor family protein,[Source:TAIR;Acc:AT1G25470]	227	177	237	10.3946	9.3009	11.5412	224	228	274	11.5844	12.6727	14.5401
AT1G25470	AT1G25470	AP2 domain-containing transcription factor family protein,[Source:TAIR;Acc:AT1G25470]	227	177	237	10.3946	9.3009	11.5412	224	228	274	11.5844	12.6727	14.5401
AT1G25480	AT1G25480	Aluminium activated malate transporter family protein,[Source:TAIR;Acc:AT1G25480]	68	57	73	3.1138	2.9952	3.5549	92	95	91	4.7579	5.2803	4.829
AT1G25490	RCN1	ARM repeat superfamily protein,[Source:TAIR;Acc:AT1G25490]	646	648	605	29.5811	34.0507	29.4617	1431	1286	1516	74.0059	71.4786	80.4479
AT1G25500	AT1G25500	Plasma-membrane choline transporter family protein,[Source:TAIR;Acc:AT1G25500]	66	64	49	3.0222	3.363	2.3862	74	44	42	3.827	2.4456	2.2288
AT1G25510	AT1G25510	Eukaryotic aspartyl protease family protein,[Source:TAIR;Acc:AT1G25510]	210	142	98	9.6162	7.4617	4.7723	56	82	21	2.8961	4.5577	1.1144
AT1G25520	AT1G25520	Uncharacterized protein family (UPF0016),[Source:TAIR;Acc:AT1G25520]	104	89	82	4.7623	4.6767	3.9932	194	168	211	10.0329	9.3378	11.1969
AT1G25520	AT1G25520	Uncharacterized protein family (UPF0016),[Source:TAIR;Acc:AT1G25520]	97	132	157	4.4417	6.9363	7.6454	159	214	116	8.2229	11.8946	6.1556
AT1G25540	PFT1	phytochrome and flowering time regulatory protein (PFT1),[Source:TAIR;Acc:AT1G25540]	348	270	317	15.9353	14.1878	15.437	592	493	655	30.616	27.402	34.7582
AT1G25550	AT1G25550	myb-like transcription factor family protein,[Source:TAIR;Acc:AT1G25550]	874	942	1520	40.0215	49.4996	74.0196	1053	1113	1566	54.4572	61.8629	83.1012
AT1G25560	TEM1	AP2/B3 transcription factor family protein,[Source:TAIR;Acc:AT1G25560]	772	1129	2699	35.3508	59.3259	131.433	800	635	1451	41.373	35.2946	76.9986
AT1G25570	AT1G25570	Di-glucose binding protein with Leucine-rich repeat domain,[Source:TAIR;Acc:AT1G25570]	411	386	480	18.8202	20.2833	23.3746	644	534	664	33.3052	29.6808	35.2357
AT1G25580	SOG1	NAC (No Apical Meristem) domain transcriptional regulator superfamily protein,[Source:TAIR;Acc:AT1G25580]	131	130	127	5.9987	6.8312	6.1845	113	91	125	5.8439	5.058	6.6332
AT1G25682	AT1G25682	Family of unknown function (DUF572),[Source:TAIR;Acc:AT1G25682]	229	243	255	10.4862	12.769	12.4178	295	296	346	15.2563	16.4523	18.3608
AT1G26090	AT1G26090	P-loop containing nucleoside triphosphate hydrolases superfamily protein,[Source:TAIR;Acc:AT1G26090]	141	149	158	6.4566	7.8296	7.6941	163	147	230	8.4297	8.1706	12.2052
AT1G26090	AT1G26090	P-loop containing nucleoside triphosphate hydrolases superfamily protein,[Source:TAIR;Acc:AT1G26090]	67	78	68	3.068	4.0987	3.3114	66	62	77	3.4133	3.4461	4.0861
AT1G26110	DCP5	decapping 5,[Source:TAIR;Acc:AT1G26110]	3106	2530	2678	142.227	132.945	130.411	2845	2368	2759	147.1326	131.6184	146.4088
AT1G26120	ICME-LIKE1	alpha/beta-Hydrolases superfamily protein,[Source:TAIR;Acc:AT1G26120]	194	200	166	8.8835	10.5095	8.0837	231	205	225	11.9464	11.3943	11.9398
AT1G26130	AT1G26130	ATPase E1-E2 type family protein / haloacid dehalogenase-like hydrolase family protein,[Source:TAIR;Acc:AT1G26130]	105	95	137	4.8081	4.992	6.6715	80	83	74	4.1373	4.6133	3.9269
AT1G26150	ATPERK10	proline-rich extensin-like receptor kinase 10,[Source:TAIR;Acc:AT1G26150]	974	800	980	44.6006	42.0379	47.7231	740	715	903	38.27	39.7412	47.9185
AT1G26160	AT1G26160	Metal-dependent phosphohydrolase,[Source:TAIR;Acc:AT1G26160]	201	180	166	9.204	9.4585	8.0837	299	250	364	15.4631	13.8955	19.316
AT1G26170	AT1G26170	ARM repeat superfamily protein,[Source:TAIR;Acc:AT1G26170]	169	149	151	7.7387	7.8296	7.3533	313	265	366	16.1872	14.7293	19.4221
AT1G26180	AT1G26180	unknown protein,[Source:TAIR;Acc:AT1G26180]	146	170	122	6.6855	8.933	5.941	346	310	420	17.8938	17.2305	22.2877
AT1G26190	AT1G26190	Phosphoribulokinase / Uridine kinase family,[Source:TAIR;Acc:AT1G26190]	126	126	126	5.7697	6.621	6.1358	137	105	146	7.0851	5.8361	7.7476
AT1G26208	AT1G26208	other RNA,[Source:TAIR;Acc:AT1G26208]	185	123	109	8.4714	6.4633	5.308	101	135	100	5.2233	7.5036	5.3066
AT1G26208	AT1G26208	other RNA,[Source:TAIR;Acc:AT1G26208]	195	124	114	8.9293	6.5159	5.5515	122	152	104	6.3094	8.4485	5.5189
AT1G26218	AT1G26218	other RNA,[Source:TAIR;Acc:AT1G26218]	137	148	139	6.2734	7.777	6.7689	255	319	297	13.1876	17.7307	15.7606
AT1G26218	AT1G26218	other RNA,[Source:TAIR;Acc:AT1G26218]	391	325	367	17.9044	17.0779	17.8718	581	592	505	30.0471	32.9046	26.7983
AT1G26218	AT1G26218	other RNA,[Source:TAIR;Acc:AT1G26218]	379	310	346	17.3549	16.2897	16.8492	554	559	479	28.6508	31.0704	25.4186
AT1G26250	AT1G26250	Proline-rich extensin-like family protein,[Source:TAIR;Acc:AT1G26250]	183	80	114	8.3798	4.2038	5.5515	90	99	50	4.6545	5.5026	2.6533
AT1G26260	CIB5	cryptochrome-interacting basic-helix-loop-helix 5,[Source:TAIR;Acc:AT1G26260]	21	32	31	0.9616	1.6815	1.5096	31	16	35	1.6032	0.8893	1.8573
AT1G26270	AT1G26270	Phosphatidylinositol 3- and 4-kinase family protein,[Source:TAIR;Acc:AT1G26270]	901	836	930	41.2579	43.9296	45.2883	1096	687	1179	56.681	38.1849	62.5647
AT1G26300	AT1G26300	BSD domain-containing protein,[Source:TAIR;Acc:AT1G26300]	146	120	146	6.6855	6.3057	7.1098	127	136	164	6.568	7.5592	8.7028
AT1G26330	AT1G26330	DNA binding,[Source:TAIR;Acc:AT1G26330]	57	46	47	2.6101	2.4172	2.2888	49	30	55	2.5341	1.6675	2.9186
AT1G26340	B5 #6	cytochrome B5 isoform A,[Source:TAIR;Acc:AT1G26340]	139	158	130	6.365	8.3025	6.3306	149	130	157	7.7057	7.2257	8.3313
AT1G26370	AT1G26370	RNA helicase family protein,[Source:TAIR;Acc:AT1G26370]	303	331	332	13.8747	17.3932	16.1674	235	237	236	12.1533	13.173	12.5235
AT1G26380	AT1G26380	FAD-binding Berberine family protein,[Source:TAIR;Acc:AT1G26380]	172	145	128	7.8761	7.6194	6.2332	2	9	20	0.1034	0.5002	1.0613
AT1G26420	AT1G26420	FAD-binding Berberine family protein,[Source:TAIR;Acc:AT1G26420]	145	174	188	6.6397	9.1432	9.1551	13	15	21	0.6723	0.8337	1.1144
AT1G26440	ATUPS5	ureide permease 5,[Source:TAIR;Acc:AT1G26440]	170	112	149	7.7845	5.8853	7.2559	223	152	156	11.5327	8.4485	8.2783
AT1G26450	AT1G26450	Carbohydrate-binding X8 domain superfamily protein,[Source:TAIR;Acc:AT1G26450]	135	121	108	6.1818	6.3582	5.2593	76	99	38	3.9304	5.5026	2.0165
AT1G26460	AT1G26460	Tetratricopeptide repeat (TPR)-like superfamily protein,[Source:TAIR;Acc:AT1G26460]	757	747	718	34.6639	39.2528	34.9645	492	485	572	25.4444	26.9573	30.3537
AT1G26470	AT1G26470	No description	113	111	126	5.1744	5.8328	6.1358	105	110	152	5.4302	6.114	8.066
AT1G26500	AT1G26500	Pentatricopeptide repeat (PPR) superfamily protein,[Source:TAIR;Acc:AT1G26500]	59	56	47	2.7017	2.9427	2.2888	23	26	13	1.1895	1.4451	0.6899
AT1G26520	AT1G26520	Cobalamin biosynthesis CobW-like protein,[Source:TAIR;Acc:AT1G26520]	24	26	22	1.099	1.3662	1.0713	17	13	26	0.8792	0.7226	1.3797
AT1G26520	AT1G26520	Cobalamin biosynthesis CobW-like protein,[Source:TAIR;Acc:AT1G26520]	115	89	94	5.266	4.6767	4.5775	75	50	95	3.8787	2.7791	5.0413
AT1G26540	AT1G26540	Agenet domain-containing protein,[Source:TAIR;Acc:AT1G26540]	109	102	139	4.9912	5.3598	6.7689	22	26	48	1.1378	1.4451	2.5472
AT1G26550	AT1G26550	FKBP-like peptidyl-prolyl cis-trans isomerase family protein,[Source:TAIR;Acc:AT1G26550]	628	660	670	28.7569	34.6812	32.627	744	719	1005	38.4769	39.9635	53.3312
AT1G26560	BGLU40	beta glucosidase 40,[Source:TAIR;Acc:AT1G26560]	438	396	533	20.0565	20.8087	25.9555	560	533	469	28.9611	29.6253	24.8879
AT1G26570	UGD1	UDP-glucose dehydrogenase 1,[Source:TAIR;Acc:AT1G26570]	151	139	151	6.9145	7.3041	7.3533	154	122	210	7.9643	6.781	11.1438
AT1G26580	AT1G26580	No description	938	787	776	42.9521	41.3547	37.7889	808	629	1047	41.7867	34.9611	55.56
AT1G26620	AT1G26620	Plant protein of unknown function (DUF863),[Source:TAIR;Acc:AT1G26620]	184	158	160	8.4256	8.3025	7.7915	183	179	295	9.4641	9.9492	15.6544
AT1G26630	FBR12	Eukaryotic translation initiation factor 5A-1 (eIF-5A 1) protein,[Source:TAIR;Acc:AT1G26630]	5717	4665	5196	261.788	245.133	253.03	7764	7010	8592	401.5246	389.6306	455.9421
AT1G26640	AT1G26640	Amino acid kinase family protein,[Source:TAIR;Acc:AT1G26640]	163	131	154	7.464	6.8837	7.4994	159	135	147	8.2229	7.5036	7.8007
AT1G26650	AT1G26650	unknown protein,[Source:TAIR;Acc:AT1G26650]	187	226	198	8.563	11.8757	9.642	234	195	263	12.1016	10.8385	13.9563
AT1G26660	AT1G26660	Prefoldin chaperone subunit family protein,[Source:TAIR;Acc:AT1G26660]	33	40	46	1.5111	2.1019	2.2401	52	52	64	2.6892	2.8903	3.3962
AT1G26665	AT1G26665	Mediator complex, subunit Med10,[Source:TAIR;Acc:AT1G26665]	134	86	110	6.136	4.5191	5.3567	110	85	117	5.6888	4.7245	6.2087
AT1G26670	VTI12	Vesicle transport v-SNARE family protein,[Source:TAIR;Acc:AT1G26670]	386	353	347	17.6754	18.5492	16.8979	688	536	692	35.5807	29.792	36.7216
AT1G26690	AT1G26690	emp24/gp25L/p24 family/GOLD family protein,[Source:TAIR;Acc:AT1G26690]	181	115	168	8.2882	6.0429	8.1811	194	174	180	10.0329	9.6713	9.5519
AT1G26740	AT1G26740	Ribosomal L32p protein family,[Source:TAIR;Acc:AT1G26740]	165	171	177	7.5556	8.9856	8.6194	141	119	165	7.292	6.6143	8.7559
AT1G26750	AT1G26750	unknown protein,[Source:TAIR;Acc:AT1G26750]	94	86	81	4.3044	4.5191	3.9445	16	31	27	0.8275	1.723	1.4328
AT1G26750	AT1G26750	unknown protein,[Source:TAIR;Acc:AT1G26750]	241	245	241	11.0357	12.8741	11.736	269	241	259	13.9117	13.3953	13.7441
AT1G26770	ATEXPA10	expansin A10,[Source:TAIR;Acc:AT1G26770]	2041	1902	1681	93.4598	99.945	81.8598	521	476	1078	26.9441	26.4571	57.205
AT1G26790	AT1G26790	Dof-type zinc finger DNA-binding family protein,[Source:TAIR;Acc:AT1G26790]	292	274	242	13.371	14.398	11.7847	66	61	13	3.4133	3.3905	0.6899
AT1G26800	AT1G26800	RING/U-box superfamily protein,[Source:TAIR;Acc:AT1G26800]	103	128	246	4.7165	6.7261	11.9795	223	154	240	11.5327	8.5596	12.7358
AT1G26810	GALT1	galactosyltransferase1,[Source:TAIR;Acc:AT1G26810]	50	45	49	2.2896	2.3646	2.3862	74	70	72	3.827	3.8907	3.8207
AT1G26820	RNS3	ribonuclease 3,[Source:TAIR;Acc:AT1G26820]	94	92	58	4.3044	4.8344	2.8244	121	104	85	6.2577	5.7805	4.5106
AT1G26830	CUL3A	cullin 3,[Source:TAIR;Acc:AT1G26830]	1344	1366	1359	61.5434	71.7796	66.1793	1209	1104	1319	62.5249	61.3627	69.9939
AT1G26840	ORC6	origin recognition complex protein 6,[Source:TAIR;Acc:AT1G26840]	23	14	20	1.0532	0.7357	0.9739	43	24	45	2.2238	1.334	2.388
AT1G26850	AT1G26850	S-adenosyl-L-methionine-dependent methyltransferases superfamily protein,[Source:TAIR;Acc:AT1G26850]	2506	2730	2820	114.753	143.454	137.326	2729	2345	3180	141.1335	130.3401	168.7495
AT1G26880	AT1G26880	Ribosomal protein L34e superfamily protein,[Source:TAIR;Acc:AT1G26880]	818	1028	825	37.4572	54.0186	40.1751	1099	1130	1155	56.8361	62.8078	61.2911
AT1G26900	AT1G26900	Pentatricopeptide repeat (PPR) superfamily protein,[Source:TAIR;Acc:AT1G26900]	112	97	106	5.1286	5.0971	5.1619	61	52	87	3.1547	2.8903	4.6167
AT1G26910	RPL10B	Ribosomal protein L16p/L10e family protein,[Source:TAIR;Acc:AT1G26910]	307	334	265	14.0579	17.5508	12.9047	254	214	244	13.1359	11.8946	12.9481
AT1G26920	AT1G26920	unknown protein,[Source:TAIR;Acc:AT1G26920]	252	308	276	11.5394	16.1846	13.4404	497	479	480	25.703	26.6238	25.4716
AT1G26930	AT1G26930	Galactose oxidase/kelch repeat superfamily protein,[Source:TAIR;Acc:AT1G26930]	390	298	425	17.8586	15.6591	20.6963	176	189	254	9.1021	10.505	13.4787
AT1G26940	AT1G26940	Cyclophilin-like peptidyl-prolyl cis-trans isomerase family protein,[Source:TAIR;Acc:AT1G26940]	33	40	31	1.5111	2.1019	1.5096	60	61	62	3.103	3.3905	3.2901
AT1G26945	KDR	basic helix-loop-helix (bHLH) DNA-binding superfamily protein,[Source:TAIR;Acc:AT1G26945]	232	161	154	10.6236	8.4601	7.4994	329	322	388	17.0146	17.8974	20.5896
AT1G26960	AtHB23	homeobox protein 23,[Source:TAIR;Acc:AT1G26960]	72	74	77	3.297	3.8885	3.7497	74	85	53	3.827	4.7245	2.8125
AT1G27000	AT1G27000	Protein of unknown function (DUF1664),[Source:TAIR;Acc:AT1G27000]	231	221	238	10.5778	11.613	11.5899	650	621	781	33.6155	34.5165	41.4445
AT1G27020	AT1G27020	unknown protein,[Source:TAIR;Acc:AT1G27020]	552	726	733	25.2767	38.1494	35.695	54	38	108	2.7927	2.1121	5.7311
AT1G27030	AT1G27030	unknown protein,[Source:TAIR;Acc:AT1G27030]	91	150	168	4.167	7.8821	8.1811	117	102	193	6.0508	5.6694	10.2417
AT1G27050	ATHB54	homeobox protein 54,[Source:TAIR;Acc:AT1G27050]	539	385	562	24.6814	20.2307	27.3678	177	162	169	9.1538	9.0043	8.9681
AT1G27060	AT1G27060	Regulator of chromosome condensation (RCC1) family protein,[Source:TAIR;Acc:AT1G27060]	152	132	128	6.9603	6.9363	6.2332	136	135	148	7.0334	7.5036	7.8538
AT1G27060	AT1G27060	Regulator of chromosome condensation (RCC1) family protein,[Source:TAIR;Acc:AT1G27060]	72	65	63	3.297	3.4156	3.0679	43	32	35	2.2238	1.7786	1.8573
AT1G27090	AT1G27090	glycine-rich protein,[Source:TAIR;Acc:AT1G27090]	3519	2735	2888	161.139	143.717	140.637	2380	2037	2599	123.0846	113.2208	137.9182
AT1G27100	AT1G27100	Actin cross-linking protein,[Source:TAIR;Acc:AT1G27100]	520	489	641	23.8114	25.6956	31.2148	1024	789	825	52.9574	43.8543	43.7794
AT1G27120	AT1G27120	Galactosyltransferase family protein,[Source:TAIR;Acc:AT1G27120]	220	187	143	10.0741	9.8264	6.9637	216	170	161	11.1707	9.449	8.5436
AT1G27130	ATGSTU13	glutathione S-transferase tau 13,[Source:TAIR;Acc:AT1G27130]	1677	1175	1188	76.7918	61.7431	57.8521	580	589	404	29.9954	32.7379	21.4386
AT1G27140	ATGSTU14	glutathione S-transferase tau 14,[Source:TAIR;Acc:AT1G27140]	24	29	14	1.099	1.5239	0.6818	6	28	4	0.3103	1.5563	0.2123
AT1G27150	AT1G27150	Tetratricopeptide repeat (TPR)-like superfamily protein,[Source:TAIR;Acc:AT1G27150]	131	110	137	5.9987	5.7802	6.6715	393	293	389	20.3245	16.2856	20.6426
AT1G27170	AT1G27170	transmembrane receptors;ATP binding,[Source:TAIR;Acc:AT1G27170]	87	70	73	3.9838	3.6783	3.5549	107	84	69	5.5336	4.6689	3.6615
AT1G27180	AT1G27180	disease resistance protein (TIR-NBS-LRR class), putative,[Source:TAIR;Acc:AT1G27180]	142	131	155	6.5024	6.8837	7.5481	128	136	132	6.6197	7.5592	7.0047
AT1G27190	AT1G27190	Leucine-rich repeat protein kinase family protein,[Source:TAIR;Acc:AT1G27190]	702	725	682	32.1454	38.0968	33.2114	980	792	880	50.6819	44.021	46.698
AT1G27200	AT1G27200	Domain of unknown function (DUF23),[Source:TAIR;Acc:AT1G27200]	297	277	295	13.6	14.5556	14.3656	348	246	290	17.9972	13.6732	15.3891
AT1G27210	AT1G27210	ARM repeat superfamily protein,[Source:TAIR;Acc:AT1G27210]	296	276	243	13.5542	14.5031	11.8334	661	576	760	34.1844	32.0153	40.3301
AT1G27285	AT1G27285	transposable element gene,[Source:TAIR;Acc:AT1G27285]	54	31	36	2.4727	1.629	1.7531	76	52	72	3.9304	2.8903	3.8207
AT1G27290	AT1G27290	unknown protein,[Source:TAIR;Acc:AT1G27290]	503	549	857	23.033	28.8485	41.7334	1427	1213	1491	73.799	67.4211	79.1212
AT1G27300	AT1G27300	unknown protein,[Source:TAIR;Acc:AT1G27300]	400	372	407	18.3165	19.5476	19.8197	229	212	316	11.843	11.7834	16.7688
AT1G27300	AT1G27300	unknown protein,[Source:TAIR;Acc:AT1G27300]	1241	1185	1098	56.8269	62.2686	53.4694	1453	1147	1502	75.1436	63.7527	79.705
AT1G27320	AHK3	histidine kinase 3,[Source:TAIR;Acc:AT1G27320]	1498	1243	1455	68.5952	65.3163	70.8542	1817	1616	1631	93.9683	89.8207	86.5505
AT1G27330	AT1G27330	Ribosome associated membrane protein RAMP4,[Source:TAIR;Acc:AT1G27330]	184	246	292	8.4256	12.9266	14.2195	284	236	398	14.6874	13.1174	21.1202
AT1G27340	AT1G27340	Galactose oxidase/kelch repeat superfamily protein,[Source:TAIR;Acc:AT1G27340]	701	752	879	32.0996	39.5156	42.8047	824	759	1002	42.6142	42.1868	53.172
AT1G27350	AT1G27350	Ribosome associated membrane protein RAMP4,[Source:TAIR;Acc:AT1G27350]	194	223	222	8.8835	11.7181	10.8108	275	223	461	14.222	12.3948	24.4634
AT1G27360	SPL11	squamosa promoter-like 11,[Source:TAIR;Acc:AT1G27360]	89	77	66	4.0754	4.0461	3.214	61	67	46	3.1547	3.724	2.441
AT1G27370	SPL10	squamosa promoter binding protein-like 10,[Source:TAIR;Acc:AT1G27370]	180	165	167	8.2424	8.6703	8.1324	113	103	138	5.8439	5.725	7.3231
AT1G27385	AT1G27385	unknown protein,[Source:TAIR;Acc:AT1G27385]	170	185	163	7.7845	9.7213	7.9376	425	422	508	21.9794	23.4557	26.9575
AT1G27390	TOM20-2	translocase outer membrane 20-2,[Source:TAIR;Acc:AT1G27390]	609	598	585	27.8868	31.4233	28.4878	368	325	366	19.0316	18.0642	19.4221
AT1G27400	AT1G27400	Ribosomal protein L22p/L17e family protein,[Source:TAIR;Acc:AT1G27400]	1186	1209	1017	54.3083	63.5297	49.5249	1549	1493	1566	80.1084	82.9841	83.1012
AT1G27410	AT1G27410	DNA repair metallo-beta-lactamase family protein,[Source:TAIR;Acc:AT1G27410]	92	97	99	4.2128	5.0971	4.821	64	65	88	3.3098	3.6128	4.6698
AT1G27420	AT1G27420	Galactose oxidase/kelch repeat superfamily protein,[Source:TAIR;Acc:AT1G27420]	56	43	46	2.5643	2.2595	2.2401	24	35	37	1.2412	1.9454	1.9634
AT1G27430	AT1G27430	GYF domain-containing protein,[Source:TAIR;Acc:AT1G27430]	895	801	872	40.9831	42.0904	42.4638	855	812	850	44.2174	45.1327	45.106
AT1G27435	AT1G27435	unknown protein,[Source:TAIR;Acc:AT1G27435]	486	432	517	22.2545	22.7004	25.1764	246	250	343	12.7222	13.8955	18.2016
AT1G27440	GUT2	Exostosin family protein,[Source:TAIR;Acc:AT1G27440]	194	146	172	8.8835	7.6719	8.3759	167	146	131	8.6366	8.115	6.9516
AT1G27450	APT1	adenine phosphoribosyl transferase 1,[Source:TAIR;Acc:AT1G27450]	1096	1125	1143	50.1871	59.1157	55.6608	1120	1077	1320	57.9221	59.8619	70.047
AT1G27460	NPGR1	no pollen germination related 1,[Source:TAIR;Acc:AT1G27460]	299	286	156	13.6916	15.0285	7.5967	493	364	435	25.4961	20.2319	23.0837
AT1G27470	AT1G27470	transducin family protein / WD-40 repeat family protein,[Source:TAIR;Acc:AT1G27470]	597	670	607	27.3373	35.2067	29.5591	241	254	345	12.4636	14.1179	18.3077
AT1G27480	AT1G27480	alpha/beta-Hydrolases superfamily protein,[Source:TAIR;Acc:AT1G27480]	634	492	543	29.0316	25.8533	26.4425	861	826	589	44.5277	45.9108	31.2558
AT1G27500	AT1G27500	Tetratricopeptide repeat (TPR)-like superfamily protein,[Source:TAIR;Acc:AT1G27500]	130	121	97	5.9529	6.3582	4.7236	172	121	154	8.8952	6.7254	8.1721
AT1G27510	AT1G27510	Protein of unknown function (DUF3506),[Source:TAIR;Acc:AT1G27510]	834	684	786	38.1898	35.9424	38.2759	1109	1066	1152	57.3533	59.2505	61.1319
AT1G27520	AT1G27520	Glycosyl hydrolase family 47 protein,[Source:TAIR;Acc:AT1G27520]	490	326	366	22.4377	17.1304	17.8231	323	292	360	16.7043	16.23	19.1037
AT1G27530	AT1G27530	No description	842	745	814	38.5562	39.1477	39.6394	628	602	711	32.4778	33.4604	37.7298
AT1G27540	AT1G27540	Protein of unknown function (DUF295),[Source:TAIR;Acc:AT1G27540]	316	294	316	14.47	15.4489	15.3883	468	390	476	24.2032	21.677	25.2594
AT1G27580	AT1G27580	Protein of unknown function (DUF295),[Source:TAIR;Acc:AT1G27580]	129	148	145	5.9071	7.777	7.0611	191	190	245	9.8778	10.5606	13.0011
AT1G27590	AT1G27590	No description	106	92	91	4.8539	4.8344	4.4314	198	154	204	10.2398	8.5596	10.8254
AT1G27595	AT1G27595	No description	406	375	396	18.5912	19.7052	19.284	348	329	450	17.9972	18.2865	23.8796
AT1G27595	AT1G27595	No description	315	302	287	14.4242	15.8693	13.9761	461	407	467	23.8412	22.6219	24.7818
AT1G27620	AT1G27620	HXXXD-type acyl-transferase family protein,[Source:TAIR;Acc:AT1G27620]	37	48	35	1.6943	2.5223	1.7044	20	27	7	1.0343	1.5007	0.3715
AT1G27630	CYCT1;3	cyclin T 1;3,[Source:TAIR;Acc:AT1G27630]	99	91	112	4.5333	4.7818	5.4541	137	103	147	7.0851	5.725	7.8007
AT1G27640	AT1G27640	No description	1855	1475	1395	84.9426	77.5073	67.9324	1020	785	1088	52.7505	43.632	57.7357
AT1G27640	AT1G27640	No description	21	23	37	0.9616	1.2086	1.8018	82	75	74	4.2407	4.1687	3.9269
AT1G27660	AT1G27660	basic helix-loop-helix (bHLH) DNA-binding superfamily protein,[Source:TAIR;Acc:AT1G27660]	42	42	25	1.9232	2.207	1.2174	40	31	15	2.0686	1.723	0.796
AT1G27670	AT1G27670	unknown protein,[Source:TAIR;Acc:AT1G27670]	38	46	26	1.7401	2.4172	1.2661	25	22	15	1.2929	1.2228	0.796
AT1G27680	APL2	ADPGLC-PPase large subunit,[Source:TAIR;Acc:AT1G27680]	85	78	114	3.8923	4.0987	5.5515	95	85	89	4.913	4.7245	4.7229
AT1G27690	AT1G27690	Protein of unknown function (DUF620),[Source:TAIR;Acc:AT1G27690]	153	147	205	7.0061	7.7245	9.9829	249	191	221	12.8773	10.6162	11.7276
AT1G27695	AT1G27695	glycine-rich protein,[Source:TAIR;Acc:AT1G27695]	370	213	331	16.9427	11.1926	16.1187	158	111	177	8.1712	6.1696	9.3927
AT1G27700	AT1G27700	Syntaxin/t-SNARE family protein,[Source:TAIR;Acc:AT1G27700]	91	80	92	4.167	4.2038	4.4801	148	119	149	7.654	6.6143	7.9068
AT1G27710	AT1G27710	Glycine-rich protein family,[Source:TAIR;Acc:AT1G27710]	14	11	39	0.6411	0.578	1.8992	22	18	40	1.1378	1.0005	2.1226
AT1G27730	STZ	salt tolerance zinc finger,[Source:TAIR;Acc:AT1G27730]	72	76	75	3.297	3.9936	3.6523	61	29	52	3.1547	1.6119	2.7594
AT1G27750	AT1G27750	nucleic acid binding,[Source:TAIR;Acc:AT1G27750]	413	328	361	18.9118	17.2355	17.5796	510	442	558	26.3753	24.5673	29.6108
AT1G27752	AT1G27752	Ubiquitin system component Cue protein,[Source:TAIR;Acc:AT1G27752]	746	658	639	34.1602	34.5761	31.1174	584	464	655	30.2023	25.7901	34.7582
AT1G27760	SAT32	interferon-related developmental regulator family protein / IFRD protein family,[Source:TAIR;Acc:AT1G27760]	232	336	855	10.6236	17.6559	41.636	150	173	565	7.7574	9.6157	29.9822
[truncated: 16,792 more rows]
