# Supplementary material for: Responses to Telomere Erosion in Plants
Source: PLoS One. 2014 Jan 21;9(1):e86220. doi: 10.1371/journal.pone.0086220 (PMC3897657; doi:10.1371/journal.pone.0086220)
Supplement: Table S2 — Lists of genes showing differential expression between tertG2, tertG7 and WT plantlets. (XLSX) [file pone.0086220.s003.xlsx]

## Sheet: tertG2 vs WT
locus	Feature	Description	G2/wt set1	G2/wt set2
AT1G05280	AT1G05280	Protein of unknown function (DUF604),[Source:TAIR;Acc:AT1G05280]	1.74865	5.15855
AT1G07410	ATRABA2B	RAB GTPase homolog A2B,[Source:TAIR;Acc:AT1G07410]	2.4589	2.08218
AT1G10070	ATBCAT-2	branched-chain amino acid transaminase 2,[Source:TAIR;Acc:AT1G10070]	0.445813	0.421242
AT1G10340	AT1G10340	Ankyrin repeat family protein,[Source:TAIR;Acc:AT1G10340]	0.367226	0.326266
AT1G11260	STP1	sugar transporter 1,[Source:TAIR;Acc:AT1G11260]	0.60733	0.420555
AT1G11810	AT1G11810	F-box associated ubiquitination effector family protein,[Source:TAIR;Acc:AT1G11810]	0.482504	0.644881
AT1G13420	ATST4B	sulfotransferase 4B,[Source:TAIR;Acc:AT1G13420]	2.04004	2.06997
AT1G14390	AT1G14390	Leucine-rich repeat protein kinase family protein,[Source:TAIR;Acc:AT1G14390]	2.83494	2.20609
AT1G14520	MIOX1	myo-inositol oxygenase 1,[Source:TAIR;Acc:AT1G14520]	0.573701	0.457317
AT1G19530	AT1G19530	unknown protein,[Source:TAIR;Acc:AT1G19530]	0.450184	0.174361
AT1G20390	AT1G20390	transposable element gene,[Source:TAIR;Acc:AT1G20390]	0.650932	0.422842
AT1G21100	AT1G21100	O-methyltransferase family protein,[Source:TAIR;Acc:AT1G21100]	0.66501	0.425364
AT1G22980	AT1G22980	unknown protein,[Source:TAIR;Acc:AT1G22980]	1.8779	2.14927
AT1G22990	AT1G22990	Heavy metal transport/detoxification superfamily protein,[Source:TAIR;Acc:AT1G22990]	0.38253	0.629127
AT1G28330	DYL1	dormancy-associated protein-like 1,[Source:TAIR;Acc:AT1G28330]	0.403119	0.612909
AT1G29560	AT1G29560	Zinc finger C-x8-C-x5-C-x3-H type family protein,[Source:TAIR;Acc:AT1G29560]	1.85369	2.25677
AT1G30160	AT1G30160	Protein of unknown function (DUF295),[Source:TAIR;Acc:AT1G30160]	0.318733	0.223896
AT1G30720	AT1G30720	FAD-binding Berberine family protein,[Source:TAIR;Acc:AT1G30720]	0.64605	0.491134
AT1G30730	AT1G30730	FAD-binding Berberine family protein,[Source:TAIR;Acc:AT1G30730]	0.657797	0.495171
AT1G31040	AT1G31040	PLATZ transcription factor family protein,[Source:TAIR;Acc:AT1G31040]	0.5871	0.204696
AT1G31258	AT1G31258	other RNA,[Source:TAIR;Acc:AT1G31258]	0.535561	0.492588
AT1G33750	AT1G33750	Terpenoid cyclases/Protein prenyltransferases superfamily protein,[Source:TAIR;Acc:AT1G33750]	2.06267	4.46438
AT1G35310	MLP168	MLP-like protein 168,[Source:TAIR;Acc:AT1G35310]	1.51476	2.37574
AT1G47980	AT1G47980	unknown protein,[Source:TAIR;Acc:AT1G47980]	0.239035	0.238828
AT1G48130	ATPER1	1-cysteine peroxiredoxin 1,[Source:TAIR;Acc:AT1G48130]	0.271766	0.231964
AT1G48670	AT1G48670	auxin-responsive GH3 family protein,[Source:TAIR;Acc:AT1G48670]	2.20679	1.95395
AT1G49570	AT1G49570	Peroxidase superfamily protein,[Source:TAIR;Acc:AT1G49570]	2.05596	1.7425
AT1G50060	AT1G50060	CAP (Cysteine-rich secretory proteins, Antigen 5, and Pathogenesis-related 1 protein) superfamily protein,[Source:TAIR;Acc:AT1G50060]	2.53257	2.01085
AT1G50950	AT1G50950	Thioredoxin protein with domain of unknown function (DUF1692),[Source:TAIR;Acc:AT1G50950]	0.474885	0.537353
AT1G52050	AT1G52050	Mannose-binding lectin superfamily protein,[Source:TAIR;Acc:AT1G52050]	2.1721	1.64893
AT1G52070	AT1G52070	Mannose-binding lectin superfamily protein,[Source:TAIR;Acc:AT1G52070]	1.79961	2.31173
AT1G52120	AT1G52120	Mannose-binding lectin superfamily protein,[Source:TAIR;Acc:AT1G52120]	2.63944	5.61777
AT1G53480	MRD1	mto 1 responding down 1,[Source:TAIR;Acc:AT1G53480]	0.490529	0.365126
AT1G53480	MRD1	mto 1 responding down 1,[Source:TAIR;Acc:AT1G53480]	0.496739	0.400898
AT1G56680	AT1G56680	Chitinase family protein,[Source:TAIR;Acc:AT1G56680]	1.54201	6.44818
AT1G63370	AT1G63370	Flavin-binding monooxygenase family protein,[Source:TAIR;Acc:AT1G63370]	0.437188	0.607482
AT1G65570	AT1G65570	Pectin lyase-like superfamily protein,[Source:TAIR;Acc:AT1G65570]	4.41357	1.66769
AT1G66100	AT1G66100	Plant thionin,[Source:TAIR;Acc:AT1G66100]	0.411389	0.632861
AT1G66270	BGLU21	Glycosyl hydrolase superfamily protein,[Source:TAIR;Acc:AT1G66270]	2.29155	2.16044
AT1G68250	AT1G68250	unknown protein,[Source:TAIR;Acc:AT1G68250]	1.77263	2.54549
AT1G69490	NAP	NAC-like, activated by AP3/PI,[Source:TAIR;Acc:AT1G69490]	2.12771	1.69215
AT1G76780	AT1G76780	HSP20-like chaperones superfamily protein,[Source:TAIR;Acc:AT1G76780]	2.89908	2.16402
AT2G01008	AT2G01008	No description	0.512137	0.358246
AT2G07213	AT2G07213	other RNA,[Source:TAIR;Acc:AT2G07213]	0.0477707	0.0597271
AT2G15810	AT2G15810	transposable element gene,[Source:TAIR;Acc:AT2G15810]	0.573794	0.26864
AT2G15880	AT2G15880	Leucine-rich repeat (LRR) family protein,[Source:TAIR;Acc:AT2G15880]	0.456779	0.657682
AT2G20515	AT2G20515	unknown protein,[Source:TAIR;Acc:AT2G20515]	2.60398	3.5825
AT2G22930	AT2G22930	UDP-Glycosyltransferase superfamily protein,[Source:TAIR;Acc:AT2G22930]	2.48653	4.72854
AT2G23050	NPY4	Phototropic-responsive NPH3 family protein,[Source:TAIR;Acc:AT2G23050]	1.69833	5.55269
AT2G23170	GH3,3	Auxin-responsive GH3 family protein,[Source:TAIR;Acc:AT2G23170]	3.01696	1.99838
AT2G23630	sks16	SKU5 similar 16,[Source:TAIR;Acc:AT2G23630]	2.84754	2.61673
AT2G25980	AT2G25980	Mannose-binding lectin superfamily protein,[Source:TAIR;Acc:AT2G25980]	1.83895	2.10066
AT2G26630	AT2G26630	transposable element gene,[Source:TAIR;Acc:AT2G26630]	0	0
AT2G27380	ATEPR1	extensin proline-rich 1,[Source:TAIR;Acc:AT2G27380]	0.104229	0.169703
AT2G28190	CSD2	copper/zinc superoxide dismutase 2,[Source:TAIR;Acc:AT2G28190]	0.586902	0.431649
AT2G28490	AT2G28490	RmlC-like cupins superfamily protein,[Source:TAIR;Acc:AT2G28490]	0.319801	0.28658
AT2G28500	LBD11	LOB domain-containing protein 11,[Source:TAIR;Acc:AT2G28500]	0.65585	0.379322
AT2G33830	AT2G33830	Dormancy/auxin associated family protein,[Source:TAIR;Acc:AT2G33830]	0.313255	0.393948
AT2G33850	AT2G33850	unknown protein,[Source:TAIR;Acc:AT2G33850]	2.6325	2.15023
AT2G37560	ORC2	origin recognition complex second largest subunit 2,[Source:TAIR;Acc:AT2G37560]	0.46678	0.512942
AT2G37900	AT2G37900	Major facilitator superfamily protein,[Source:TAIR;Acc:AT2G37900]	1.74423	2.68697
AT2G37980	AT2G37980	O-fucosyltransferase family protein,[Source:TAIR;Acc:AT2G37980]	2.39072	1.7587
AT2G38160	AT2G38160	unknown protein,[Source:TAIR;Acc:AT2G38160]	1.61703	2.14953
AT2G38240	AT2G38240	2-oxoglutarate (2OG) and Fe(II)-dependent oxygenase superfamily protein,[Source:TAIR;Acc:AT2G38240]	2.00819	1.53536
AT2G38250	AT2G38250	Homeodomain-like superfamily protein,[Source:TAIR;Acc:AT2G38250]	0.583484	0.434032
AT2G41260	M17	glycine-rich protein / late embryogenesis abundant protein (M17),[Source:TAIR;Acc:AT2G41260]	0.60009	0.460605
AT2G41800	AT2G41800	Protein of unknown function, DUF642,[Source:TAIR;Acc:AT2G41800]	1.56037	2.04352
AT2G43610	AT2G43610	Chitinase family protein,[Source:TAIR;Acc:AT2G43610]	1.55587	2.35859
AT3G03500	AT3G03500	TatD related DNase,[Source:TAIR;Acc:AT3G03500]	3.77098	2.56284
AT3G04320	AT3G04320	Kunitz family trypsin and protease inhibitor protein,[Source:TAIR;Acc:AT3G04320]	1.92882	2.24714
AT3G07070	AT3G07070	Protein kinase superfamily protein,[Source:TAIR;Acc:AT3G07070]	4.39971	1.52858
AT3G09940	MDHAR	monodehydroascorbate reductase,[Source:TAIR;Acc:AT3G09940]	1.86692	2.23904
AT3G13610	AT3G13610	2-oxoglutarate (2OG) and Fe(II)-dependent oxygenase superfamily protein,[Source:TAIR;Acc:AT3G13610]	2.05393	1.97363
AT3G13650	AT3G13650	Disease resistance-responsive (dirigent-like protein) family protein,[Source:TAIR;Acc:AT3G13650]	2.07055	1.55972
AT3G15620	UVR3	DNA photolyase family protein,[Source:TAIR;Acc:AT3G15620]	0.63232	0.442549
AT3G15670	AT3G15670	Late embryogenesis abundant protein (LEA) family protein,[Source:TAIR;Acc:AT3G15670]	0.631843	0.362287
AT3G19700	IKU2	Leucine-rich repeat protein kinase family protein,[Source:TAIR;Acc:AT3G19700]	1.69762	2.43519
AT3G19710	IKU2	Leucine-rich repeat protein kinase family protein,[Source:TAIR;Acc:AT3G19700]	1.89646	2.18583
AT3G20940	CYP705A30	cytochrome P450, family 705, subfamily A, polypeptide 30,[Source:TAIR;Acc:AT3G20940]	2.29506	3.0589
AT3G21330	AT3G21330	basic helix-loop-helix (bHLH) DNA-binding superfamily protein,[Source:TAIR;Acc:AT3G21330]	2.65133	2.05641
AT3G21360	AT3G21360	2-oxoglutarate (2OG) and Fe(II)-dependent oxygenase superfamily protein,[Source:TAIR;Acc:AT3G21360]	0.273191	0.0666577
AT3G21380	AT3G21380	Mannose-binding lectin superfamily protein,[Source:TAIR;Acc:AT3G21380]	0.153006	0.0116858
AT3G24240	AT3G24240	Leucine-rich repeat receptor-like protein kinase family protein,[Source:TAIR;Acc:AT3G24240]	1.60066	2.50773
AT3G26960	AT3G26960	Pollen Ole e 1 allergen and extensin family protein,[Source:TAIR;Acc:AT3G26960]	1.55247	3.1732
AT3G28750	AT3G28750	unknown protein,[Source:TAIR;Acc:AT3G28750]	0.264824	0.358257
AT3G29642	AT3G29642	transposable element gene,[Source:TAIR;Acc:AT3G29642]	0.127467	0.214957
AT3G47340	ASN1	glutamine-dependent asparagine synthase 1,[Source:TAIR;Acc:AT3G47340]	0.371038	0.443929
AT3G49180	RID3	Transducin/WD40 repeat-like superfamily protein,[Source:TAIR;Acc:AT3G49180]	1.53595	2.75687
AT3G49580	LSU1	response to low sulfur 1,[Source:TAIR;Acc:AT3G49580]	1.94582	3.1416
AT3G49780	ATPSK4	phytosulfokine 4 precursor,[Source:TAIR;Acc:AT3G49780]	0.522005	0.473084
AT3G52780	ATPAP20	Purple acid phosphatases superfamily protein,[Source:TAIR;Acc:AT3G52780]	0.529649	0.214943
AT3G54940	AT3G54940	Papain family cysteine protease,[Source:TAIR;Acc:AT3G54940]	0.54079	0.327093
AT3G55500	ATEXPA16	expansin A16,[Source:TAIR;Acc:AT3G55500]	0.646399	0.335635
AT3G57160	AT3G57160	unknown protein,[Source:TAIR;Acc:AT3G57160]	1.68292	2.07799
AT4G04223	AT4G04223	other RNA,[Source:TAIR;Acc:AT4G04223]	0.437188	0.659503
AT4G06701	AT4G06701	other RNA,[Source:TAIR;Acc:AT4G06701]	0.514421	0.460597
AT4G11190	AT4G11190	Disease resistance-responsive (dirigent-like protein) family protein,[Source:TAIR;Acc:AT4G11190]	3.34704	2.44261
AT4G13575	AT4G13575	unknown protein,[Source:TAIR;Acc:AT4G13575]	1.74865	2.59202
AT4G15660	AT4G15660	Thioredoxin superfamily protein,[Source:TAIR;Acc:AT4G15660]	0.599861	0.447792
AT4G15670	AT4G15670	Thioredoxin superfamily protein,[Source:TAIR;Acc:AT4G15670]	0.622386	0.47289
AT4G16745	AT4G16745	Exostosin family protein,[Source:TAIR;Acc:AT4G16745]	0.500196	0.308994
AT4G21830	ATMSRB7	methionine sulfoxide reductase B7,[Source:TAIR;Acc:AT4G21830]	1.57456	2.27449
AT4G24340	AT4G24340	Phosphorylase superfamily protein,[Source:TAIR;Acc:AT4G24340]	2.63944	1.98423
AT4G26270	PFK3	phosphofructokinase 3,[Source:TAIR;Acc:AT4G26270]	2.32788	2.08981
AT4G27400	AT4G27400	Late embryogenesis abundant (LEA) protein-related,[Source:TAIR;Acc:AT4G27400]	1.6546	2.71838
AT4G29690	AT4G29690	Alkaline-phosphatase-like family protein,[Source:TAIR;Acc:AT4G29690]	2.58583	2.17645
AT4G30110	HMA2	heavy metal atpase 2,[Source:TAIR;Acc:AT4G30110]	1.50276	2.00429
AT4G31940	CYP82C4	cytochrome P450, family 82, subfamily C, polypeptide 4,[Source:TAIR;Acc:AT4G31940]	1.97455	2.80449
AT4G32800	AT4G32800	Integrase-type DNA-binding superfamily protein,[Source:TAIR;Acc:AT4G32800]	0.401638	0.562983
AT4G36700	AT4G36700	RmlC-like cupins superfamily protein,[Source:TAIR;Acc:AT4G36700]	4.31838	1.86801
AT4G37160	AT4G37160	sks15 (SKU5 Similar 15); copper ion binding	2.16757	2.62714
AT4G37400	CYP81F3	cytochrome P450, family 81, subfamily F, polypeptide 3,[Source:TAIR;Acc:AT4G37400]	1.60653	2.2929
AT5G02780	GSTL1	glutathione transferase lambda 1,[Source:TAIR;Acc:AT5G02780]	1.85632	2.14952
AT5G04390	AT5G04390	C2H2-type zinc finger family protein,[Source:TAIR;Acc:AT5G04390]	0.518281	0.437872
AT5G05390	LAC12	laccase 12,[Source:TAIR;Acc:AT5G05390]	5.10046	6.85207
AT5G09290	AT5G09290	Inositol monophosphatase family protein,[Source:TAIR;Acc:AT5G09290]	1.70156	2.64555
AT5G09970	CYP78A7	cytochrome P450, family 78, subfamily A, polypeptide 7,[Source:TAIR;Acc:AT5G09970]	2.00811	1.80744
AT5G10130	AT5G10130	Pollen Ole e 1 allergen and extensin family protein,[Source:TAIR;Acc:AT5G10130]	1.66627	2.86605
AT5G10140	FLC	K-box region and MADS-box transcription factor family protein,[Source:TAIR;Acc:AT5G10140]	0.334668	0.158041
AT5G11920	AtcwINV6	6-&1-fructan exohydrolase,[Source:TAIR;Acc:AT5G11920]	2.10398	4.19122
AT5G13170	SAG29	senescence-associated gene 29,[Source:TAIR;Acc:AT5G13170]	1.5934	2.36694
AT5G15360	AT5G15360	unknown protein,[Source:TAIR;Acc:AT5G15360]	0	0
AT5G16490	RIC4	ROP-interactive CRIB motif-containing protein 4,[Source:TAIR;Acc:AT5G16490]	0.545067	0.496058
AT5G16840	BPA1	binding partner of acd11 1,[Source:TAIR;Acc:AT5G16840]	39.6333	34.7501
AT5G16860	AT5G16860	Tetratricopeptide repeat (TPR)-like superfamily protein,[Source:TAIR;Acc:AT5G16860]	2.83162	6.91568
AT5G18540	AT5G18540	unknown protein,[Source:TAIR;Acc:AT5G18540]	1.85369	2.14927
AT5G19890	AT5G19890	Peroxidase superfamily protein,[Source:TAIR;Acc:AT5G19890]	3.72964	1.52001
AT5G20550	AT5G20550	2-oxoglutarate (2OG) and Fe(II)-dependent oxygenase superfamily protein,[Source:TAIR;Acc:AT5G20550]	2.17644	1.62591
AT5G23660	MTN3	homolog of Medicago truncatula MTN3,[Source:TAIR;Acc:AT5G23660]	0.605061	0.448092
AT5G24660	LSU2	response to low sulfur 2,[Source:TAIR;Acc:AT5G24660]	2.52462	1.72618
AT5G25500	AT5G25500	unknown protein,[Source:TAIR;Acc:AT5G25500]	1.86885	2.20333
AT5G28145	AT5G28145	transposable element gene,[Source:TAIR;Acc:AT5G28145]	0.601082	0.268687
AT5G35935	AT5G35935	transposable element gene,[Source:TAIR;Acc:AT5G35935]	5.86557	2.84047
AT5G38020	AT5G38020	S-adenosyl-L-methionine-dependent methyltransferases superfamily protein,[Source:TAIR;Acc:AT5G38020]	2.37162	1.73426
AT5G38040	AT5G38040	UDP-Glycosyltransferase superfamily protein,[Source:TAIR;Acc:AT5G38040]	0.478162	0.358232
AT5G39160	AT5G39160	RmlC-like cupins superfamily protein,[Source:TAIR;Acc:AT5G39160]	0.365869	0.268687
AT5G39190	GLP2A	germin-like protein 2,[Source:TAIR;Acc:AT5G39190]	0.4237	0.19289
AT5G40840	SYN2	Rad21/Rec8-like family protein,[Source:TAIR;Acc:AT5G40840]	1.99459	2.20333
AT5G44120	CRA1	RmlC-like cupins superfamily protein,[Source:TAIR;Acc:AT5G44120]	0.298593	0.514672
AT5G44568	AT5G44568	unknown protein,[Source:TAIR;Acc:AT5G44568]	2.44795	1.76815
AT5G45150	RTL3	RNAse THREE-like protein 3,[Source:TAIR;Acc:AT5G45150]	0.459052	0.39599
AT5G45210	AT5G45210	Disease resistance protein (TIR-NBS-LRR class) family,[Source:TAIR;Acc:AT5G45210]	1.88992	2.24714
AT5G45990	AT5G45990	crooked neck protein, putative / cell cycle protein, putative,[Source:TAIR;Acc:AT5G45990]	0.334668	0.402949
AT5G47980	AT5G47980	HXXXD-type acyl-transferase family protein,[Source:TAIR;Acc:AT5G47980]	2.35248	1.55242
AT5G48000	CYP708A2	cytochrome P450, family 708, subfamily A, polypeptide 2,[Source:TAIR;Acc:AT5G48000]	2.582	2.06997
AT5G48010	THAS	thalianol synthase 1,[Source:TAIR;Acc:AT5G48010]	4.23694	1.5524
AT5G48940	AT5G48940	Leucine-rich repeat transmembrane protein kinase family protein,[Source:TAIR;Acc:AT5G48940]	1.95506	3.34365
AT5G50260	AT5G50260	Cysteine proteinases superfamily protein,[Source:TAIR;Acc:AT5G50260]	0.459019	0.509058
AT5G52930	AT5G52930	Protein of unknown function (DUF295),[Source:TAIR;Acc:AT5G52930]	0.645421	0.0671903
AT5G52940	AT5G52940	Protein of unknown function (DUF295),[Source:TAIR;Acc:AT5G52940]	0.218594	0.104839
AT5G53210	SPCH	basic helix-loop-helix (bHLH) DNA-binding superfamily protein,[Source:TAIR;Acc:AT5G53210]	0.632034	0.498693
AT5G53230	AT5G53230	Protein of unknown function (DUF295),[Source:TAIR;Acc:AT5G53230]	0.466184	0.302254
AT5G53240	AT5G53240	Protein of unknown function (DUF295),[Source:TAIR;Acc:AT5G53240]	0.215095	0.0895907
AT5G54370	AT5G54370	Late embryogenesis abundant (LEA) protein-related,[Source:TAIR;Acc:AT5G54370]	1.90987	2.22299
AT5G56720	AT5G56720	Lactate/malate dehydrogenase family protein,[Source:TAIR;Acc:AT5G56720]	1.53008	2.82137
AT5G60530	AT5G60530	late embryogenesis abundant protein-related	1.89594	2.51717
AT5G61740	ATATH14	ABC2 homolog 14,[Source:TAIR;Acc:AT5G61740]	0.229258	0.430008
AT5G62280	AT5G62280	Protein of unknown function (DUF1442),[Source:TAIR;Acc:AT5G62280]	2.33645	1.51778
AT5G62340	AT5G62340	Plant invertase/pectin methylesterase inhibitor superfamily protein,[Source:TAIR;Acc:AT5G62340]	1.95445	3.0226
AT5G62490	ATHVA22B	HVA22 homologue B,[Source:TAIR;Acc:AT5G62490]	0.459032	0.376196
AT5G63090	LOB	Lateral organ boundaries (LOB) domain family protein,[Source:TAIR;Acc:AT5G63090]	0.641274	0.296101
AT5G63750	ATARI13	RING/U-box superfamily protein,[Source:TAIR;Acc:AT5G63750]	0.382431	0.537458
AT5G65320	AT5G65320	basic helix-loop-helix (bHLH) DNA-binding superfamily protein,[Source:TAIR;Acc:AT5G65320]	3.44339	1.65343
AT5G66650	AT5G66650	Protein of unknown function (DUF607),[Source:TAIR;Acc:AT5G66650]	0.573768	0.381568
ATCG00290	TRNS,2	tRNA-Ser,[Source:TAIR;Acc:ATCG00290]	1.51879	3.22431
ATMG01370	ORF111D	hypothetical protein,[Source:TAIR;Acc:ATMG01370]	2.37701	1.56319
NP_191130	AT3G55710	UDP-glucoronosyl/UDP-glucosyl transferase family protein [Source:RefSeq peptide;Acc:NP_191130]	0.365123	0.27418
NP_192524	AT4G07820	pathogenesis-related protein, putative [Source:RefSeq peptide;Acc:NP_192524]	0.207745	0.313033
NP_195439	AT4G37220	stress-responsive protein, putative [Source:RefSeq peptide;Acc:NP_195439]	0.430326	0.36521
NP_197453	AT5G19520	MSL9 (MECHANOSENSITIVE CHANNEL OF SMALL CONDUCTANCE-LIKE 9); mechanically-gated ion channel [Source:RefSeq peptide;Acc:NP_197453]	1.58762	2.56885
NP_197999	AT5G26270	unknown protein [Source:RefSeq peptide;Acc:NP_197999]	0.430773	0.237952
NP_199689	AT5G48780	disease resistance protein (TIR-NBS class), putative [Source:RefSeq peptide;Acc:NP_199689]	0.518281	0.314563
NP_567394	AT4G12830	hydrolase, alpha/beta fold family protein [Source:RefSeq peptide;Acc:NP_567394]	2.11581	1.72527
Q39165	AT5G40420	Oleosin 21,2 kDa (Oleosin type 2) [Source:UniProtKB/Swiss-Prot;Acc:Q39165]	0.468402	0.449149
Q6ICW6	AT5G55560	Probable serine/threonine-protein kinase WNK11 (AtWNK11)(EC 2,7,11,1)(Protein kinase with no lysine 11) [Source:UniProtKB/Swiss-Prot;Acc:Q6ICW6]	0.472542	0.561811
Q96324	AT3G03190	Glutathione S-transferase (EC 2,5,1,18)(GST class-phi) [Source:UniProtKB/Swiss-Prot;Acc:Q96324]	1.8778	2.41821
Q9FKC8	AT5G37990	Probable S-adenosylmethionine-dependent methyltransferase At5g37990 (EC 2,1,1,-) [Source:UniProtKB/Swiss-Prot;Acc:Q9FKC8]	5.93011	33.8656
Q9LDA4	AT4G08780	Peroxidase 38 Precursor (Atperox P38)(EC 1,11,1,7) [Source:UniProtKB/Swiss-Prot;Acc:Q9LDA4]	1.72129	2.62742

## Sheet: tertG7 vs tertG2
locus	Feature	Description	G7/G2 set1	G7/G2 set2
AT1G01010	ANAC001	NAC domain containing protein 1,[Source:TAIR;Acc:AT1G01010]	0.369782	0.3728
AT1G01110	IQD18	IQ-domain 18,[Source:TAIR;Acc:AT1G01110]	0.623751	0.44245
AT1G01225	AT1G01225	NC domain-containing protein-related,[Source:TAIR;Acc:AT1G01225]	0.240273	0.489008
AT1G01390	AT1G01390	UDP-Glycosyltransferase superfamily protein,[Source:TAIR;Acc:AT1G01390]	0.558577	0.255735
AT1G01750	ADF11	actin depolymerizing factor 11,[Source:TAIR;Acc:AT1G01750]	0.608167	0.461972
AT1G02650	AT1G02650	Tetratricopeptide repeat (TPR)-like superfamily protein,[Source:TAIR;Acc:AT1G02650]	2.24205	3.28846
AT1G02800	ATCEL2	cellulase 2,[Source:TAIR;Acc:AT1G02800]	0.61789	0.0829944
AT1G02900	RALFL1	rapid alkalinization factor 1,[Source:TAIR;Acc:AT1G02900]	0.617822	0.399176
AT1G03090	MCCA	methylcrotonyl-CoA carboxylase alpha chain, mitochondrial / 3-methylcrotonyl-CoA carboxylase 1 (MCCA),[Source:TAIR;Acc:AT1G03090]	1.51383	2.12186
AT1G03106	AT1G03106	unknown protein,[Source:TAIR;Acc:AT1G03106]	0.154468	0.260386
AT1G03840	MGP	C2H2 and C2HC zinc fingers superfamily protein,[Source:TAIR;Acc:AT1G03840]	0.400761	0.232239
AT1G04560	AT1G04560	AWPM-19-like family protein,[Source:TAIR;Acc:AT1G04560]	0.105316	0
AT1G05240	AT1G05240	Peroxidase superfamily protein,[Source:TAIR;Acc:AT1G05240]	0.552988	0.416964
AT1G05260	RCI3	Peroxidase superfamily protein,[Source:TAIR;Acc:AT1G05260]	0.530647	0.294804
AT1G05280	AT1G05280	Protein of unknown function (DUF604),[Source:TAIR;Acc:AT1G05280]	0.405471	0.11934
AT1G05490	chr31	chromatin remodeling 31,[Source:TAIR;Acc:AT1G05490]	6.06609	1.75864
AT1G05640	AT1G05640	Ankyrin repeat family protein,[Source:TAIR;Acc:AT1G05640]	0.648702	0.354631
AT1G05660	AT1G05660	Pectin lyase-like superfamily protein,[Source:TAIR;Acc:AT1G05660]	0.481883	0.21038
AT1G06350	AT1G06350	Fatty acid desaturase family protein,[Source:TAIR;Acc:AT1G06350]	1.85346	2.29127
AT1G06520	ATGPAT1	glycerol-3-phosphate acyltransferase 1,[Source:TAIR;Acc:AT1G06520]	2.05206	6.80189
AT1G06830	AT1G06830	Glutaredoxin family protein,[Source:TAIR;Acc:AT1G06830]	0.213853	0.213043
AT1G07740	AT1G07740	Tetratricopeptide repeat (TPR)-like superfamily protein,[Source:TAIR;Acc:AT1G07740]	0.610016	0.336423
AT1G08340	AT1G08340	Rho GTPase activating protein with PAK-box/P21-Rho-binding domain,[Source:TAIR;Acc:AT1G08340]	0.601377	0.359204
AT1G08500	ENODL18	early nodulin-like protein 18,[Source:TAIR;Acc:AT1G08500]	0.356446	0.5183
AT1G08560	SYP111	syntaxin of plants 111,[Source:TAIR;Acc:AT1G08560]	0.610506	0.459145
AT1G09080	BIP3	Heat shock protein 70 (Hsp 70) family protein,[Source:TAIR;Acc:AT1G09080]	3.30538	8.35493
AT1G09390	AT1G09390	GDSL-like Lipase/Acylhydrolase superfamily protein,[Source:TAIR;Acc:AT1G09390]	3.24326	2.33387
AT1G09540	MYB61	myb domain protein 61,[Source:TAIR;Acc:AT1G09540]	0.38349	0.336967
AT1G09850	XBCP3	xylem bark cysteine peptidase 3,[Source:TAIR;Acc:AT1G09850]	2.26538	1.70492
AT1G09890	AT1G09890	Rhamnogalacturonate lyase family protein,[Source:TAIR;Acc:AT1G09890]	0.494291	0.565045
AT1G11080	scpl31	serine carboxypeptidase-like 31,[Source:TAIR;Acc:AT1G11080]	0.3925	0.360928
AT1G11450	AT1G11450	nodulin MtN21 /EamA-like transporter family protein,[Source:TAIR;Acc:AT1G11450]	0.651461	0.320381
AT1G11740	AT1G11740	ankyrin repeat family protein,[Source:TAIR;Acc:AT1G11740]	0.178232	0.238665
AT1G12080	AT1G12080	Vacuolar calcium-binding protein-related,[Source:TAIR;Acc:AT1G12080]	0.378426	0.391682
AT1G12320	AT1G12320	Protein of unknown function (DUF1442),[Source:TAIR;Acc:AT1G12320]	0.639447	0.460885
AT1G12740	CYP87A2	cytochrome P450, family 87, subfamily A, polypeptide 2,[Source:TAIR;Acc:AT1G12740]	0.383469	0.322854
AT1G13130	AT1G13130	Cellulase (glycosyl hydrolase family 5) protein,[Source:TAIR;Acc:AT1G13130]	0.595732	0.296296
AT1G13420	ATST4B	sulfotransferase 4B,[Source:TAIR;Acc:AT1G13420]	0.231693	0.146871
AT1G13430	ATST4C	sulfotransferase 4C,[Source:TAIR;Acc:AT1G13430]	0.331	0.136395
AT1G13690	ATE1	ATPase E1,[Source:TAIR;Acc:AT1G13690]	3.29232	1.52142
AT1G14240	AT1G14240	GDA1/CD39 nucleoside phosphatase family protein,[Source:TAIR;Acc:AT1G14240]	0.397145	0.282868
AT1G14480	AT1G14480	Ankyrin repeat family protein,[Source:TAIR;Acc:AT1G14480]	1.5446	2.1004
AT1G14520	MIOX1	myo-inositol oxygenase 1,[Source:TAIR;Acc:AT1G14520]	2.64791	1.52762
AT1G14540	AT1G14540	Peroxidase superfamily protein,[Source:TAIR;Acc:AT1G14540]	0.568661	0.365641
AT1G14640	AT1G14640	SWAP (Suppressor-of-White-APricot)/surp domain-containing protein,[Source:TAIR;Acc:AT1G14640]	2.06729	1.63096
AT1G14780	AT1G14780	MAC/Perforin domain-containing protein,[Source:TAIR;Acc:AT1G14780]	2.67994	2.51704
AT1G14780	AT1G14780	MAC/Perforin domain-containing protein,[Source:TAIR;Acc:AT1G14780]	1.97092	2.10395
AT1G15210	PDR7	pleiotropic drug resistance 7,[Source:TAIR;Acc:AT1G15210]	0.664115	0.405354
AT1G15310	ATHSRP54A	signal recognition particle 54 kDa subunit,[Source:TAIR;Acc:AT1G15310]	1.85346	2.1843
AT1G15330	AT1G15330	Cystathionine beta-synthase (CBS) protein,[Source:TAIR;Acc:AT1G15330]	0.360398	0
AT1G15405	AT1G15405	other RNA,[Source:TAIR;Acc:AT1G15405]	7.41342	2.45501
AT1G15460	ATBOR4	HCO3- transporter family,[Source:TAIR;Acc:AT1G15460]	0.4634	0.343708
AT1G16310	AT1G16310	Cation efflux family protein,[Source:TAIR;Acc:AT1G16310]	0.609701	0.260386
AT1G16330	CYCB3;1	cyclin b3;1,[Source:TAIR;Acc:AT1G16330]	0.40778	0.60754
AT1G16400	CYP79F2	cytochrome P450, family 79, subfamily F, polypeptide 2,[Source:TAIR;Acc:AT1G16400]	0.56696	0.408621
AT1G16410	CYP79F1	cytochrome p450 79f1,[Source:TAIR;Acc:AT1G16410]	0.579681	0.130594
AT1G16510	AT1G16510	SAUR-like auxin-responsive protein family,[Source:TAIR;Acc:AT1G16510]	2.80916	2.35877
AT1G17420	LOX3	lipoxygenase 3,[Source:TAIR;Acc:AT1G17420]	2.09652	2.03851
AT1G17460	TRFL3	TRF-like 3,[Source:TAIR;Acc:AT1G17460]	2.09257	2.38689
AT1G17744	AT1G17744	unknown protein,[Source:TAIR;Acc:AT1G17744]	0.583447	0.462379
AT1G17744	AT1G17744	unknown protein,[Source:TAIR;Acc:AT1G17744]	0.494456	0.474017
AT1G17830	AT1G17830	Protein of unknown function (DUF789),[Source:TAIR;Acc:AT1G17830]	1.61961	2.03469
AT1G18140	LAC1	laccase 1,[Source:TAIR;Acc:AT1G18140]	0.282062	0.260386
AT1G18180	AT1G18180	Protein of unknown function (DUF1295),[Source:TAIR;Acc:AT1G18180]	1.57536	2.13682
AT1G18590	SOT17	sulfotransferase 17,[Source:TAIR;Acc:AT1G18590]	0.615476	0.495491
AT1G18880	AT1G18880	Major facilitator superfamily protein,[Source:TAIR;Acc:AT1G18880]	0.60651	0.457194
AT1G19380	AT1G19380	Protein of unknown function (DUF1195),[Source:TAIR;Acc:AT1G19380]	2.5949	4.0345
AT1G19610	LCR78	Arabidopsis defensin-like protein,[Source:TAIR;Acc:AT1G19610]	2.26939	7.82908
AT1G19900	AT1G19900	glyoxal oxidase-related protein,[Source:TAIR;Acc:AT1G19900]	0.343239	0.116082
AT1G20350	ATTIM17-1	translocase inner membrane subunit 17-1,[Source:TAIR;Acc:AT1G20350]	2.62575	4.44758
AT1G20440	COR47	cold-regulated 47,[Source:TAIR;Acc:AT1G20440]	0.664402	0.456742
AT1G20620	CAT3	catalase 3,[Source:TAIR;Acc:AT1G20620]	2.19753	2.16732
AT1G21520	AT1G21520	unknown protein,[Source:TAIR;Acc:AT1G21520]	1.58221	71.5818
AT1G21910	AT1G21910	Integrase-type DNA-binding superfamily protein,[Source:TAIR;Acc:AT1G21910]	1.53609	2.32968
AT1G22030	AT1G22030	No description	0.54847	0.409179
AT1G22590	AGL87	AGAMOUS-like 87,[Source:TAIR;Acc:AT1G22590]	0.492938	0.575699
AT1G22980	AT1G22980	unknown protein,[Source:TAIR;Acc:AT1G22980]	1.7504	2.57791
AT1G23340	AT1G23340	Protein of Unknown Function (DUF239),[Source:TAIR;Acc:AT1G23340]	0.421256	0.265199
AT1G23790	AT1G23790	Plant protein of unknown function (DUF936),[Source:TAIR;Acc:AT1G23790]	0.656447	0.440646
AT1G24130	AT1G24130	Transducin/WD40 repeat-like superfamily protein,[Source:TAIR;Acc:AT1G24130]	0.264794	0.0454935
AT1G24310	AT1G24310	unknown protein,[Source:TAIR;Acc:AT1G24310]	0.510642	0.496462
AT1G24430	AT1G24430	HXXXD-type acyl-transferase family protein,[Source:TAIR;Acc:AT1G24430]	0.463345	0.532436
AT1G25510	AT1G25510	Eukaryotic aspartyl protease family protein,[Source:TAIR;Acc:AT1G25510]	0.639573	0.244509
AT1G25560	TEM1	AP2/B3 transcription factor family protein,[Source:TAIR;Acc:AT1G25560]	2.21544	2.1816
AT1G27140	ATGSTU14	glutathione S-transferase tau 14,[Source:TAIR;Acc:AT1G27140]	0.447405	0.136413
AT1G27660	AT1G27660	basic helix-loop-helix (bHLH) DNA-binding superfamily protein,[Source:TAIR;Acc:AT1G27660]	0.551609	0.461985
AT1G27710	AT1G27710	Glycine-rich protein family,[Source:TAIR;Acc:AT1G27710]	3.28581	2.12154
AT1G27760	SAT32	interferon-related developmental regulator family protein / IFRD protein family,[Source:TAIR;Acc:AT1G27760]	2.35819	3.11805
AT1G28260	AT1G28260	Telomerase activating protein Est1,[Source:TAIR;Acc:AT1G28260]	1.71949	2.09575
AT1G28710	AT1G28710	Nucleotide-diphospho-sugar transferase family protein,[Source:TAIR;Acc:AT1G28710]	0.584904	0.472734
AT1G28815	AT1G28815	unknown protein,[Source:TAIR;Acc:AT1G28815]	0.370709	0.517166
AT1G30040	ATGA2OX2	gibberellin 2-oxidase,[Source:TAIR;Acc:AT1G30040]	2.307	5.46811
AT1G30080	AT1G30080	Glycosyl hydrolase superfamily protein,[Source:TAIR;Acc:AT1G30080]	0.617784	0.381889
AT1G30160	AT1G30160	Protein of unknown function (DUF295),[Source:TAIR;Acc:AT1G30160]	17.2394	9.73858
AT1G30170	AT1G30170	Protein of unknown function (DUF295),[Source:TAIR;Acc:AT1G30170]	5.2956	41.9946
AT1G30280	AT1G30280	Chaperone DnaJ-domain superfamily protein,[Source:TAIR;Acc:AT1G30280]	0.643548	0.381972
AT1G30473	AT1G30473	Heavy metal transport/detoxification superfamily protein,[Source:TAIR;Acc:AT1G30473]	2.10618	2.44653
AT1G30473	AT1G30473	Heavy metal transport/detoxification superfamily protein,[Source:TAIR;Acc:AT1G30473]	1.86998	2.31149
AT1G30750	AT1G30750	unknown protein,[Source:TAIR;Acc:AT1G30750]	0.372038	0.391682
AT1G30840	PUP4	purine permease 4,[Source:TAIR;Acc:AT1G30840]	0.545573	0.154822
AT1G31950	AT1G31950	Terpenoid cyclases/Protein prenyltransferases superfamily protein,[Source:TAIR;Acc:AT1G31950]	0.374633	0.545564
AT1G32450	NRT1,5	nitrate transporter 1,5,[Source:TAIR;Acc:AT1G32450]	0.605708	0.194708
AT1G32583	AT1G32583	No description	2.31686	5.58162
AT1G33170	AT1G33170	S-adenosyl-L-methionine-dependent methyltransferases superfamily protein,[Source:TAIR;Acc:AT1G33170]	0.566833	0.132799
AT1G33750	AT1G33750	Terpenoid cyclases/Protein prenyltransferases superfamily protein,[Source:TAIR;Acc:AT1G33750]	0.3981	0.318251
AT1G33790	AT1G33790	jacalin lectin family protein,[Source:TAIR;Acc:AT1G33790]	1.84742	3.51278
AT1G34180	anac016	NAC domain containing protein 16,[Source:TAIR;Acc:AT1G34180]	1.92132	3.40978
AT1G34670	AtMYB93	myb domain protein 93,[Source:TAIR;Acc:AT1G34670]	0.453496	0.477377
AT1G35260	MLP165	MLP-like protein 165,[Source:TAIR;Acc:AT1G35260]	0.558771	0.372177
AT1G36180	ACC2	acetyl-CoA carboxylase 2,[Source:TAIR;Acc:AT1G36180]	3.94787	4.79125
AT1G43800	AT1G43800	Plant stearoyl-acyl-carrier-protein desaturase family protein,[Source:TAIR;Acc:AT1G43800]	0.448339	0.515779
AT1G43886	AT1G43886	transposable element gene,[Source:TAIR;Acc:AT1G43886]	1.65304	2.12584
AT1G44970	AT1G44970	Peroxidase superfamily protein,[Source:TAIR;Acc:AT1G44970]	0.506809	0.356702
AT1G47600	BGLU34	beta glucosidase 34,[Source:TAIR;Acc:AT1G47600]	0.655261	0.248147
AT1G48400	AT1G48400	F-box/RNI-like/FBD-like domains-containing protein,[Source:TAIR;Acc:AT1G48400]	1.51641	2.03682
AT1G48660	AT1G48660	Auxin-responsive GH3 family protein,[Source:TAIR;Acc:AT1G48660]	1.96939	2.22759
AT1G49450	AT1G49450	Transducin/WD40 repeat-like superfamily protein,[Source:TAIR;Acc:AT1G49450]	0.261915	0.155866
AT1G49570	AT1G49570	Peroxidase superfamily protein,[Source:TAIR;Acc:AT1G49570]	0.387918	0.268298
AT1G49700	AT1G49700	Plant protein 1589 of unknown function,[Source:TAIR;Acc:AT1G49700]	2.83742	3.28602
AT1G49920	AT1G49920	MuDR family transposase,[Source:TAIR;Acc:AT1G49920]	2.07582	2.74455
AT1G51470	BGLU35	beta glucosidase 35,[Source:TAIR;Acc:AT1G51470]	0.545132	0.277183
AT1G51890	AT1G51890	Leucine-rich repeat protein kinase family protein,[Source:TAIR;Acc:AT1G51890]	0.598285	0.499571
AT1G52050	AT1G52050	Mannose-binding lectin superfamily protein,[Source:TAIR;Acc:AT1G52050]	0.606164	0.230161
AT1G52060	AT1G52060	Mannose-binding lectin superfamily protein,[Source:TAIR;Acc:AT1G52060]	0.579798	0.280385
AT1G52070	AT1G52070	Mannose-binding lectin superfamily protein,[Source:TAIR;Acc:AT1G52070]	0.524836	0.299819
AT1G52270	AT1G52270	unknown protein,[Source:TAIR;Acc:AT1G52270]	1.80188	2.07789
AT1G52290	AT1G52290	Protein kinase superfamily protein,[Source:TAIR;Acc:AT1G52290]	0.452835	0.650951
AT1G52315	AT1G52315	Regulator of Vps4 activity in the MVB pathway protein,[Source:TAIR;Acc:AT1G52315]	3.9208	2.57791
AT1G52690	AT1G52690	Late embryogenesis abundant protein (LEA) family protein,[Source:TAIR;Acc:AT1G52690]	0.453507	0.238681
AT1G52740	HTA9	histone H2A protein 9,[Source:TAIR;Acc:AT1G52740]	0.480844	0.393826
AT1G53120	AT1G53120	RNA-binding S4 domain-containing protein,[Source:TAIR;Acc:AT1G53120]	0.509705	0.15912
AT1G53480	MRD1	mto 1 responding down 1,[Source:TAIR;Acc:AT1G53480]	0.0725255	0.355485
AT1G53480	MRD1	mto 1 responding down 1,[Source:TAIR;Acc:AT1G53480]	0.0421266	0.269699
AT1G53540	AT1G53540	HSP20-like chaperones superfamily protein,[Source:TAIR;Acc:AT1G53540]	2.31671	5.49906
AT1G54000	AT1G54000	GDSL-like Lipase/Acylhydrolase superfamily protein,[Source:TAIR;Acc:AT1G54000]	0.62028	0.478951
AT1G54540	AT1G54540	Late embryogenesis abundant (LEA) hydroxyproline-rich glycoprotein family,[Source:TAIR;Acc:AT1G54540]	0.423325	0.30487
AT1G54870	AT1G54870	NAD(P)-binding Rossmann-fold superfamily protein,[Source:TAIR;Acc:AT1G54870]	0.042128	0.477361
AT1G55240	AT1G55240	Family of unknown function (DUF716),[Source:TAIR;Acc:AT1G55240]	0.463368	0.445546
AT1G55740	AtSIP1	seed imbibition 1,[Source:TAIR;Acc:AT1G55740]	0.478713	0.471743
AT1G55990	AT1G55990	glycine-rich protein,[Source:TAIR;Acc:AT1G55990]	0.271531	0.12717
AT1G56150	AT1G56150	SAUR-like auxin-responsive protein family,[Source:TAIR;Acc:AT1G56150]	4.36922	1.54575
AT1G56310	AT1G56310	Polynucleotidyl transferase, ribonuclease H-like superfamily protein,[Source:TAIR;Acc:AT1G56310]	0.648699	0.448616
AT1G56600	AtGolS2	galactinol synthase 2,[Source:TAIR;Acc:AT1G56600]	0.602379	0.349291
AT1G56680	AT1G56680	Chitinase family protein,[Source:TAIR;Acc:AT1G56680]	0.431025	0.254573
AT1G58070	AT1G58070	unknown protein,[Source:TAIR;Acc:AT1G58070]	0.569635	0.337387
AT1G58889	AT1G58889	transposable element gene,[Source:TAIR;Acc:AT1G58889]	1.65031	2.0792
AT1G59265	AT1G59265	transposable element gene,[Source:TAIR;Acc:AT1G59265]	1.80789	3.16962
AT1G59660	AT1G59660	Nucleoporin autopeptidase,[Source:TAIR;Acc:AT1G59660]	1.92553	2.25779
AT1G60030	ATNAT7	nucleobase-ascorbate transporter 7,[Source:TAIR;Acc:AT1G60030]	2.36308	2.62555
AT1G60060	AT1G60060	Serine/threonine-protein kinase WNK (With No Lysine)-related,[Source:TAIR;Acc:AT1G60060]	2.10981	3.27926
AT1G61255	AT1G61255	No description	2.25507	4.51325
AT1G61470	AT1G61470	Polynucleotidyl transferase, ribonuclease H-like superfamily protein,[Source:TAIR;Acc:AT1G61470]	3.82255	2.0885
AT1G61490	AT1G61490	S-locus lectin protein kinase family protein,[Source:TAIR;Acc:AT1G61490]	2.08504	2.86405
AT1G61810	BGLU45	beta-glucosidase 45,[Source:TAIR;Acc:AT1G61810]	1.59397	2.82885
AT1G62320	AT1G62320	ERD (early-responsive to dehydration stress) family protein,[Source:TAIR;Acc:AT1G62320]	0.361678	0.424335
AT1G62360	STM	KNOX/ELK homeobox transcription factor,[Source:TAIR;Acc:AT1G62360]	2.5392	1.79712
AT1G62500	AT1G62500	Bifunctional inhibitor/lipid-transfer protein/seed storage 2S albumin superfamily protein,[Source:TAIR;Acc:AT1G62500]	0.393622	0.0856246
AT1G62560	FMO GS-OX3	flavin-monooxygenase glucosinolate S-oxygenase 3,[Source:TAIR;Acc:AT1G62560]	0.631491	0.182085
AT1G62570	FMO GS-OX4	flavin-monooxygenase glucosinolate S-oxygenase 4,[Source:TAIR;Acc:AT1G62570]	0.498747	0.555529
AT1G63100	AT1G63100	GRAS family transcription factor,[Source:TAIR;Acc:AT1G63100]	0.541784	0.307263
AT1G63295	AT1G63295	Remorin family protein,[Source:TAIR;Acc:AT1G63295]	0.566316	0.417688
AT1G63350	AT1G63350	Disease resistance protein (CC-NBS-LRR class) family,[Source:TAIR;Acc:AT1G63350]	1.59781	2.10032
AT1G63650	EGL3	basic helix-loop-helix (bHLH) DNA-binding superfamily protein,[Source:TAIR;Acc:AT1G63650]	0.463367	0.288231
AT1G63750	AT1G63750	Disease resistance protein (TIR-NBS-LRR class) family,[Source:TAIR;Acc:AT1G63750]	1.72763	3.82753
AT1G64380	AT1G64380	Integrase-type DNA-binding superfamily protein,[Source:TAIR;Acc:AT1G64380]	2.1624	1.65145
AT1G64590	AT1G64590	NAD(P)-binding Rossmann-fold superfamily protein,[Source:TAIR;Acc:AT1G64590]	0.179379	0.0577012
AT1G65310	ATXTH17	xyloglucan endotransglucosylase/hydrolase 17,[Source:TAIR;Acc:AT1G65310]	0.410009	0.250702
AT1G65500	AT1G65500	unknown protein,[Source:TAIR;Acc:AT1G65500]	1.88072	2.54618
AT1G65570	AT1G65570	Pectin lyase-like superfamily protein,[Source:TAIR;Acc:AT1G65570]	0.352135	0.551615
AT1G65860	FMO GS-OX1	flavin-monooxygenase glucosinolate S-oxygenase 1,[Source:TAIR;Acc:AT1G65860]	0.629344	0.189544
AT1G66040	VIM4	Zinc finger (C3HC4-type RING finger) family protein,[Source:TAIR;Acc:AT1G66040]	3.55233	1.51162
AT1G66270	BGLU21	Glycosyl hydrolase superfamily protein,[Source:TAIR;Acc:AT1G66270]	0.401058	0.23566
AT1G66280	BGLU22	Glycosyl hydrolase superfamily protein,[Source:TAIR;Acc:AT1G66280]	0.401514	0.210242
AT1G66500	AT1G66500	Pre-mRNA cleavage complex II,[Source:TAIR;Acc:AT1G66500]	2.35894	3.246
AT1G67105	AT1G67105	other RNA,[Source:TAIR;Acc:AT1G67105]	4.89819	5.64164
AT1G67600	AT1G67600	Acid phosphatase/vanadium-dependent haloperoxidase-related protein,[Source:TAIR;Acc:AT1G67600]	2.44325	2.0885
AT1G67970	AT-HSFA8	heat shock transcription factor A8,[Source:TAIR;Acc:AT1G67970]	2.34125	3.67188
AT1G68250	AT1G68250	unknown protein,[Source:TAIR;Acc:AT1G68250]	0	0.0424196
AT1G69080	AT1G69080	Adenine nucleotide alpha hydrolases-like superfamily protein,[Source:TAIR;Acc:AT1G69080]	0.617863	0.286434
AT1G70170	MMP	matrix metalloproteinase,[Source:TAIR;Acc:AT1G70170]	0.319575	0.182533
AT1G70260	AT1G70260	nodulin MtN21 /EamA-like transporter family protein,[Source:TAIR;Acc:AT1G70260]	1.62167	20.0432
AT1G70430	AT1G70430	Protein kinase superfamily protein,[Source:TAIR;Acc:AT1G70430]	5.90771	6.85672
AT1G70850	MLP34	MLP-like protein 34,[Source:TAIR;Acc:AT1G70850]	0.574603	0.499713
AT1G70890	MLP43	MLP-like protein 43,[Source:TAIR;Acc:AT1G70890]	2.46342	1.58702
AT1G70990	AT1G70990	proline-rich family protein,[Source:TAIR;Acc:AT1G70990]	0.370718	0.617737
AT1G71030	ATMYBL2	MYB-like 2,[Source:TAIR;Acc:AT1G71030]	2.32113	2.43147
AT1G71692	AGL12	AGAMOUS-like 12,[Source:TAIR;Acc:AT1G71692]	0.525184	0.437556
AT1G71740	AT1G71740	unknown protein,[Source:TAIR;Acc:AT1G71740]	0.315947	0.5852
AT1G72060	AT1G72060	serine-type endopeptidase inhibitors,[Source:TAIR;Acc:AT1G72060]	1.62783	2.70505
AT1G72060	AT1G72060	serine-type endopeptidase inhibitors,[Source:TAIR;Acc:AT1G72060]	1.55767	2.24785
AT1G72230	AT1G72230	Cupredoxin superfamily protein,[Source:TAIR;Acc:AT1G72230]	0.441814	0.273611
AT1G72520	AT1G72520	PLAT/LH2 domain-containing lipoxygenase family protein,[Source:TAIR;Acc:AT1G72520]	2.07153	2.7774
AT1G73330	ATDR4	drought-repressed 4,[Source:TAIR;Acc:AT1G73330]	0.308908	0.0910241
AT1G73480	AT1G73480	alpha/beta-Hydrolases superfamily protein,[Source:TAIR;Acc:AT1G73480]	2.02827	1.66455
AT1G74430	MYB95	myb domain protein 95,[Source:TAIR;Acc:AT1G74430]	2.17779	2.12168
AT1G74430	MYB95	myb domain protein 95,[Source:TAIR;Acc:AT1G74430]	1.72419	2.43469
AT1G74500	ATBS1	activation-tagged BRI1(brassinosteroid-insensitive 1)-suppressor 1,[Source:TAIR;Acc:AT1G74500]	0.611993	0.31824
AT1G75580	AT1G75580	SAUR-like auxin-responsive protein family,[Source:TAIR;Acc:AT1G75580]	1.91963	10.3114
AT1G75590	AT1G75590	SAUR-like auxin-responsive protein family,[Source:TAIR;Acc:AT1G75590]	0.60109	0.329239
AT1G76250	AT1G76250	unknown protein,[Source:TAIR;Acc:AT1G76250]	0.479362	0.392116
AT1G76620	AT1G76620	Protein of unknown function, DUF547,[Source:TAIR;Acc:AT1G76620]	0.499048	0.477347
AT1G76930	ATEXT4	extensin 4,[Source:TAIR;Acc:AT1G76930]	1.66963	2.77349
AT1G78120	AT1G78120	Tetratricopeptide repeat (TPR)-like superfamily protein,[Source:TAIR;Acc:AT1G78120]	0.508938	0.292159
AT1G78340	ATGSTU22	glutathione S-transferase TAU 22,[Source:TAIR;Acc:AT1G78340]	0.644868	0.489995
AT1G78370	ATGSTU20	glutathione S-transferase TAU 20,[Source:TAIR;Acc:AT1G78370]	0.606371	0.232352
AT1G78430	RIP2	ROP interactive partner 2,[Source:TAIR;Acc:AT1G78430]	0.663252	0.342713
AT1G79640	AT1G79640	Protein kinase superfamily protein,[Source:TAIR;Acc:AT1G79640]	1.82837	2.00896
AT1G79760	DTA4	downstream target of AGL15-4,[Source:TAIR;Acc:AT1G79760]	0.523829	0.27279
AT1G80110	ATPP2-B11	phloem protein 2-B11,[Source:TAIR;Acc:AT1G80110]	3.16619	1.90945
AT1G80120	AT1G80120	Protein of unknown function (DUF567),[Source:TAIR;Acc:AT1G80120]	0.644002	0.190945
AT1G80240	AT1G80240	Protein of unknown function, DUF642,[Source:TAIR;Acc:AT1G80240]	0.495997	0.258129
AT1G80280	AT1G80280	alpha/beta-Hydrolases superfamily protein,[Source:TAIR;Acc:AT1G80280]	0.511086	0.33088
AT1G80340	GA4H	gibberellin 3-oxidase 2,[Source:TAIR;Acc:AT1G80340]	0.545132	0.159145
AT1G80440	AT1G80440	Galactose oxidase/kelch repeat superfamily protein,[Source:TAIR;Acc:AT1G80440]	2.20076	1.77271
AT1G80960	AT1G80960	F-box and Leucine Rich Repeat domains containing protein,[Source:TAIR;Acc:AT1G80960]	0.379152	0.409184
AT2G01021	AT2G01021	unknown protein,[Source:TAIR;Acc:AT2G01021]	1.73126	2.60678
AT2G01120	ORC4	origin recognition complex subunit 4,[Source:TAIR;Acc:AT2G01120]	1.88656	2.23495
AT2G01880	PAP7	purple acid phosphatase 7,[Source:TAIR;Acc:AT2G01880]	0.401611	0.184789
AT2G02130	PDF2,3	low-molecular-weight cysteine-rich 68,[Source:TAIR;Acc:AT2G02130]	0.630818	0.480467
AT2G02610	AT2G02610	Cysteine/Histidine-rich C1 domain family protein,[Source:TAIR;Acc:AT2G02610]	0.634115	0.286421
AT2G03090	ATEXPA15	expansin A15,[Source:TAIR;Acc:AT2G03090]	0.433172	0.354168
AT2G03710	2004-09-01	K-box region and MADS-box transcription factor family protein,[Source:TAIR;Acc:AT2G03710]	0.647445	0.249828
AT2G04800	AT2G04800	unknown protein,[Source:TAIR;Acc:AT2G04800]	0.337024	0.581117
AT2G05380	GRP3S	glycine-rich protein 3 short isoform,[Source:TAIR;Acc:AT2G05380]	1.52235	2.78262
AT2G07170	AT2G07170	ARM repeat superfamily protein,[Source:TAIR;Acc:AT2G07170]	0.567822	0.477368
AT2G07213	AT2G07213	other RNA,[Source:TAIR;Acc:AT2G07213]	3.71048	3.81835
AT2G15370	FUT5	fucosyltransferase 5,[Source:TAIR;Acc:AT2G15370]	0.3641	0.177995
AT2G15810	AT2G15810	transposable element gene,[Source:TAIR;Acc:AT2G15810]	3.0888	5.96761
AT2G15880	AT2G15880	Leucine-rich repeat (LRR) family protein,[Source:TAIR;Acc:AT2G15880]	2.19254	3.42306
AT2G15890	MEE14	maternal effect embryo arrest 14,[Source:TAIR;Acc:AT2G15890]	2.27867	2.3672
AT2G16270	AT2G16270	unknown protein,[Source:TAIR;Acc:AT2G16270]	0.640289	0.472447
AT2G16570	ATASE	GLN phosphoribosyl pyrophosphate amidotransferase 1,[Source:TAIR;Acc:AT2G16570]	1.51097	2.18794
AT2G16760	AT2G16760	Calcium-dependent phosphotriesterase superfamily protein,[Source:TAIR;Acc:AT2G16760]	0.474131	0.361236
AT2G16850	PIP3B	plasma membrane intrinsic protein 2;8,[Source:TAIR;Acc:AT2G16850]	0.552334	0.464176
AT2G16980	AT2G16980	Major facilitator superfamily protein,[Source:TAIR;Acc:AT2G16980]	0.308932	0.310837
AT2G17040	anac036	NAC domain containing protein 36,[Source:TAIR;Acc:AT2G17040]	2.54833	7.08081
AT2G18000	TAF14	TBP-associated factor 14,[Source:TAIR;Acc:AT2G18000]	2.57433	2.38655
AT2G18180	AT2G18180	Sec14p-like phosphatidylinositol transfer family protein,[Source:TAIR;Acc:AT2G18180]	1.79543	29.5863
AT2G18193	AT2G18193	P-loop containing nucleoside triphosphate hydrolases superfamily protein,[Source:TAIR;Acc:AT2G18193]	1.66376	17.2896
AT2G18328	ATRL4	RAD-like 4,[Source:TAIR;Acc:AT2G18328]	0.448885	0.420082
AT2G18540	AT2G18540	RmlC-like cupins superfamily protein,[Source:TAIR;Acc:AT2G18540]	0.280195	0.636582
AT2G18600	AT2G18600	Ubiquitin-conjugating enzyme family protein,[Source:TAIR;Acc:AT2G18600]	7.87678	4.05757
AT2G18800	ATXTH21	xyloglucan endotransglucosylase/hydrolase 21,[Source:TAIR;Acc:AT2G18800]	0.209269	0.0779512
AT2G19690	PLA2-BETA	phospholipase A2-beta,[Source:TAIR;Acc:AT2G19690]	0.637131	0.488452
AT2G20515	AT2G20515	unknown protein,[Source:TAIR;Acc:AT2G20515]	0.612586	0.38191
AT2G20590	AT2G20590	Reticulon family protein,[Source:TAIR;Acc:AT2G20590]	0.661932	0.460885
AT2G20750	ATEXPB1	expansin B1,[Source:TAIR;Acc:AT2G20750]	0.451172	0.279091
AT2G21100	AT2G21100	Disease resistance-responsive (dirigent-like protein) family protein,[Source:TAIR;Acc:AT2G21100]	0.410183	0.426203
AT2G21450	CHR34	chromatin remodeling 34,[Source:TAIR;Acc:AT2G21450]	1.63727	11.4532
AT2G21880	ATRAB7A	RAB GTPase homolog 7A,[Source:TAIR;Acc:AT2G21880]	0.300571	0.647272
AT2G22122	AT2G22122	unknown protein,[Source:TAIR;Acc:AT2G22122]	0.48351	0.405434
AT2G22330	CYP79B3	cytochrome P450, family 79, subfamily B, polypeptide 3,[Source:TAIR;Acc:AT2G22330]	0.440124	0.304161
AT2G22510	AT2G22510	hydroxyproline-rich glycoprotein family protein,[Source:TAIR;Acc:AT2G22510]	0.578468	0.342114
AT2G22590	AT2G22590	UDP-Glycosyltransferase superfamily protein,[Source:TAIR;Acc:AT2G22590]	0.62618	0.0389572
AT2G22610	AT2G22610	Di-glucose binding protein with Kinesin motor domain,[Source:TAIR;Acc:AT2G22610]	0.657643	0.392116
AT2G22930	AT2G22930	UDP-Glycosyltransferase superfamily protein,[Source:TAIR;Acc:AT2G22930]	0.213867	0.0434249
AT2G23050	NPY4	Phototropic-responsive NPH3 family protein,[Source:TAIR;Acc:AT2G23050]	0.438318	0.523564
AT2G23348	AT2G23348	unknown protein,[Source:TAIR;Acc:AT2G23348]	1.66794	2.49682
AT2G23540	AT2G23540	GDSL-like Lipase/Acylhydrolase superfamily protein,[Source:TAIR;Acc:AT2G23540]	0.480245	0.486602
AT2G23630	sks16	SKU5 similar 16,[Source:TAIR;Acc:AT2G23630]	0.414946	0.187528
AT2G23910	AT2G23910	NAD(P)-binding Rossmann-fold superfamily protein,[Source:TAIR;Acc:AT2G23910]	0.665868	0.272774
AT2G24300	AT2G24300	Calmodulin-binding protein,[Source:TAIR;Acc:AT2G24300]	0.502629	0.491017
AT2G24430	ANAC039	NAC domain containing protein 38,[Source:TAIR;Acc:AT2G24430]	0.579256	0.402017
AT2G24600	AT2G24600	Ankyrin repeat family protein,[Source:TAIR;Acc:AT2G24600]	2.41274	3.57592
AT2G25090	CIPK16	CBL-interacting protein kinase 16,[Source:TAIR;Acc:AT2G25090]	2.09733	1.61317
AT2G25160	CYP82F1	cytochrome P450, family 82, subfamily F, polypeptide 1,[Source:TAIR;Acc:AT2G25160]	0.340434	0.340037
AT2G25810	TIP4;1	tonoplast intrinsic protein 4;1,[Source:TAIR;Acc:AT2G25810]	0.599323	0.363063
AT2G25980	AT2G25980	Mannose-binding lectin superfamily protein,[Source:TAIR;Acc:AT2G25980]	0.358111	0.299746
AT2G26040	PYL2	PYR1-like 2,[Source:TAIR;Acc:AT2G26040]	0.440569	0.441729
AT2G27370	AT2G27370	Uncharacterised protein family (UPF0497),[Source:TAIR;Acc:AT2G27370]	0.20389	0.220326
AT2G27740	AT2G27740	Family of unknown function (DUF662),[Source:TAIR;Acc:AT2G27740]	0.586907	0.462927
AT2G28120	AT2G28120	Major facilitator superfamily protein,[Source:TAIR;Acc:AT2G28120]	2.43118	2.36869
AT2G28140	AT2G28140	Protein of unknown function (DUF1635),[Source:TAIR;Acc:AT2G28140]	2.19491	2.9967
AT2G28160	FIT1	FER-like regulator of iron uptake,[Source:TAIR;Acc:AT2G28160]	0.644672	0.249929
AT2G28490	AT2G28490	RmlC-like cupins superfamily protein,[Source:TAIR;Acc:AT2G28490]	0.599687	0.477283
AT2G28500	LBD11	LOB domain-containing protein 11,[Source:TAIR;Acc:AT2G28500]	7.6451	6.52384
AT2G28671	AT2G28671	unknown protein,[Source:TAIR;Acc:AT2G28671]	0.513404	0.353434
AT2G28671	AT2G28671	unknown protein,[Source:TAIR;Acc:AT2G28671]	0.513105	0.346966
AT2G28760	UXS6	UDP-XYL synthase 6,[Source:TAIR;Acc:AT2G28760]	0.543498	0.468893
AT2G28780	AT2G28780	unknown protein,[Source:TAIR;Acc:AT2G28780]	0.284751	0.234432
AT2G28990	AT2G28990	Leucine-rich repeat protein kinase family protein,[Source:TAIR;Acc:AT2G28990]	0.434434	0.422275
AT2G29130	LAC2	laccase 2,[Source:TAIR;Acc:AT2G29130]	0.463368	0.0829944
AT2G30210	LAC3	laccase 3,[Source:TAIR;Acc:AT2G30210]	0.5221	0.403356
AT2G30250	WRKY25	WRKY DNA-binding protein 25,[Source:TAIR;Acc:AT2G30250]	2.04558	2.98437
AT2G30820	AT2G30820	unknown protein,[Source:TAIR;Acc:AT2G30820]	0.437649	0.500086
AT2G31300	ARPC1B	actin-related protein C1B,[Source:TAIR;Acc:AT2G31300]	1.79543	2.07793
AT2G31980	AtCYS2	PHYTOCYSTATIN 2,[Source:TAIR;Acc:AT2G31980]	2.75866	2.26749
AT2G32510	MAPKKK17	mitogen-activated protein kinase kinase kinase 17,[Source:TAIR;Acc:AT2G32510]	0.456004	0.305531
AT2G32990	AtGH9B8	glycosyl hydrolase 9B8,[Source:TAIR;Acc:AT2G32990]	0.554582	0.167621
AT2G33790	ATAGP30	arabinogalactan protein 30,[Source:TAIR;Acc:AT2G33790]	0.225335	0.067458
AT2G34150	WAVE1	SCAR family protein,[Source:TAIR;Acc:AT2G34150]	0.622433	0.343097
AT2G34190	AT2G34190	Xanthine/uracil permease family protein,[Source:TAIR;Acc:AT2G34190]	0.291552	0.338125
AT2G34910	AT2G34910	No description	0.540598	0.358026
AT2G35000	AT2G35000	RING/U-box superfamily protein,[Source:TAIR;Acc:AT2G35000]	0.569285	0.24953
AT2G35765	AT2G35765	unknown protein,[Source:TAIR;Acc:AT2G35765]	0.433146	0.203913
AT2G35980	YLS9	Late embryogenesis abundant (LEA) hydroxyproline-rich glycoprotein family,[Source:TAIR;Acc:AT2G35980]	0.19719	0.47742
AT2G36090	AT2G36090	F-box family protein,[Source:TAIR;Acc:AT2G36090]	0.525841	0.335846
AT2G36640	ATECP63	embryonic cell protein 63,[Source:TAIR;Acc:AT2G36640]	0.252737	0.254648
AT2G36780	AT2G36780	UDP-Glycosyltransferase superfamily protein,[Source:TAIR;Acc:AT2G36780]	2.34775	3.24613
AT2G37090	IRX9	Nucleotide-diphospho-sugar transferases superfamily protein,[Source:TAIR;Acc:AT2G37090]	0.446801	0.450099
AT2G37380	AT2G37380	unknown protein,[Source:TAIR;Acc:AT2G37380]	0.477847	0.565769
AT2G37420	AT2G37420	ATP binding microtubule motor family protein,[Source:TAIR;Acc:AT2G37420]	0.4413	0.626543
AT2G37460	AT2G37460	nodulin MtN21 /EamA-like transporter family protein,[Source:TAIR;Acc:AT2G37460]	0.58033	0.313693
AT2G37870	AT2G37870	Bifunctional inhibitor/lipid-transfer protein/seed storage 2S albumin superfamily protein,[Source:TAIR;Acc:AT2G37870]	0.21291	0.340037
AT2G37980	AT2G37980	O-fucosyltransferase family protein,[Source:TAIR;Acc:AT2G37980]	0.611631	0.335943
AT2G38090	AT2G38090	Duplicated homeodomain-like superfamily protein,[Source:TAIR;Acc:AT2G38090]	0.654893	0.369156
AT2G38250	AT2G38250	Homeodomain-like superfamily protein,[Source:TAIR;Acc:AT2G38250]	4.94259	4.72832
AT2G38330	AT2G38330	MATE efflux family protein,[Source:TAIR;Acc:AT2G38330]	3.19188	2.29147
AT2G38390	AT2G38390	Peroxidase superfamily protein,[Source:TAIR;Acc:AT2G38390]	0.236348	0.297574
AT2G38530	LTP2	lipid transfer protein 2,[Source:TAIR;Acc:AT2G38530]	3.59626	4.68606
AT2G38620	CDKB1;2	cyclin-dependent kinase B1;2,[Source:TAIR;Acc:AT2G38620]	0.65714	0.431931
AT2G39040	AT2G39040	Peroxidase superfamily protein,[Source:TAIR;Acc:AT2G39040]	0.409881	0.11935
AT2G39110	AT2G39110	Protein kinase superfamily protein,[Source:TAIR;Acc:AT2G39110]	0.527277	0.425883
AT2G39310	JAL22	jacalin-related lectin 22,[Source:TAIR;Acc:AT2G39310]	2.26747	2.53357
AT2G39430	AT2G39430	Disease resistance-responsive (dirigent-like protein) family protein,[Source:TAIR;Acc:AT2G39430]	0.401715	0.376199
AT2G39530	AT2G39530	Uncharacterised protein family (UPF0497),[Source:TAIR;Acc:AT2G39530]	0.581886	0.148594
AT2G39830	DAR2	DA1-related protein 2,[Source:TAIR;Acc:AT2G39830]	0.558577	0.389682
AT2G39980	AT2G39980	HXXXD-type acyl-transferase family protein,[Source:TAIR;Acc:AT2G39980]	2.44478	2.29702
AT2G40000	HSPRO2	ortholog of sugar beet HS1 PRO-1 2,[Source:TAIR;Acc:AT2G40000]	2.45303	2.02585
AT2G40080	ELF4	Protein of unknown function (DUF1313),[Source:TAIR;Acc:AT2G40080]	0.574306	0.230442
AT2G40113	AT2G40113	Pollen Ole e 1 allergen and extensin family protein,[Source:TAIR;Acc:AT2G40113]	0.429447	0.483574
AT2G40170	ATEM6	Stress induced protein,[Source:TAIR;Acc:AT2G40170]	0.644713	0.260386
AT2G40200	AT2G40200	basic helix-loop-helix (bHLH) DNA-binding superfamily protein,[Source:TAIR;Acc:AT2G40200]	2.10056	5.12087
AT2G40320	TBL33	TRICHOME BIREFRINGENCE-LIKE 33,[Source:TAIR;Acc:AT2G40320]	0.469708	0.361236
AT2G40480	AT2G40480	Plant protein of unknown function (DUF827),[Source:TAIR;Acc:AT2G40480]	0.631198	0.410085
AT2G41010	ATCAMBP25	calmodulin (CAM)-binding protein of 25 kDa,[Source:TAIR;Acc:AT2G41010]	1.9531	2.08649
AT2G41240	BHLH100	basic helix-loop-helix protein 100,[Source:TAIR;Acc:AT2G41240]	0.421942	0.565132
AT2G41260	M17	glycine-rich protein / late embryogenesis abundant protein (M17),[Source:TAIR;Acc:AT2G41260]	2.38997	10.2572
AT2G41660	MIZ1	Protein of unknown function, DUF617,[Source:TAIR;Acc:AT2G41660]	0.637953	0.278911
AT2G41800	AT2G41800	Protein of unknown function, DUF642,[Source:TAIR;Acc:AT2G41800]	0.648288	0.37482
AT2G42060	AT2G42060	Cysteine/Histidine-rich C1 domain family protein,[Source:TAIR;Acc:AT2G42060]	0.4634	0.262074
AT2G42560	AT2G42560	late embryogenesis abundant domain-containing protein / LEA domain-containing protein,[Source:TAIR;Acc:AT2G42560]	0.437622	0.198876
AT2G42900	AT2G42900	Plant basic secretory protein (BSP) family protein,[Source:TAIR;Acc:AT2G42900]	0.608454	0.429376
AT2G43050	ATPMEPCRD	Plant invertase/pectin methylesterase inhibitor superfamily,[Source:TAIR;Acc:AT2G43050]	0.389206	0.266444
AT2G43100	IPMI2	isopropylmalate isomerase 2,[Source:TAIR;Acc:AT2G43100]	0.6375	0.229224
AT2G43510	ATTI1	trypsin inhibitor protein 1,[Source:TAIR;Acc:AT2G43510]	1.79711	2.07936
AT2G44100	ATGDI1	guanosine nucleotide diphosphate dissociation inhibitor 1,[Source:TAIR;Acc:AT2G44100]	0.337024	0.666486
AT2G45480	AtGRF9	growth-regulating factor 9,[Source:TAIR;Acc:AT2G45480]	0.604377	0.141467
AT2G45900	AT2G45900	Phosphatidylinositol N-acetyglucosaminlytransferase subunit P-related,[Source:TAIR;Acc:AT2G45900]	0.548832	0.498123
AT2G46640	AT2G46640	unknown protein,[Source:TAIR;Acc:AT2G46640]	0.617804	0.377938
AT2G46660	CYP78A6	cytochrome P450, family 78, subfamily A, polypeptide 6,[Source:TAIR;Acc:AT2G46660]	0.493463	0.46927
AT2G47260	WRKY23	WRKY DNA-binding protein 23,[Source:TAIR;Acc:AT2G47260]	2.43875	1.81397
AT2G47680	AT2G47680	zinc finger (CCCH type) helicase family protein,[Source:TAIR;Acc:AT2G47680]	2.14654	2.72975
AT2G47780	AT2G47780	Rubber elongation factor protein (REF),[Source:TAIR;Acc:AT2G47780]	2.42867	3.00307
AT2G47890	AT2G47890	B-box type zinc finger protein with CCT domain,[Source:TAIR;Acc:AT2G47890]	0.651215	0.483405
AT2G48130	AT2G48130	Bifunctional inhibitor/lipid-transfer protein/seed storage 2S albumin superfamily protein,[Source:TAIR;Acc:AT2G48130]	0.44211	0.324776
AT2G48140	EDA4	Bifunctional inhibitor/lipid-transfer protein/seed storage 2S albumin superfamily protein,[Source:TAIR;Acc:AT2G48140]	0.527205	0.460027
AT3G01040	GAUT13	galacturonosyltransferase 13,[Source:TAIR;Acc:AT3G01040]	0.489452	0.638907
AT3G01050	MUB1	membrane-anchored ubiquitin-fold protein 1 precursor,[Source:TAIR;Acc:AT3G01050]	0.622529	0.456859
AT3G01190	AT3G01190	Peroxidase superfamily protein,[Source:TAIR;Acc:AT3G01190]	0.442659	0.237478
AT3G01260	AT3G01260	Galactose mutarotase-like superfamily protein,[Source:TAIR;Acc:AT3G01260]	0.199129	0.378845
AT3G01350	AT3G01350	Major facilitator superfamily protein,[Source:TAIR;Acc:AT3G01350]	0.661228	0.391284
AT3G01440	PQL1	PsbQ-like 1,[Source:TAIR;Acc:AT3G01440]	0.599375	0.426947
AT3G01600	anac044	NAC domain containing protein 44,[Source:TAIR;Acc:AT3G01600]	1.94793	9.89185
AT3G01960	AT3G01960	unknown protein,[Source:TAIR;Acc:AT3G01960]	0.463368	0.238671
AT3G01990	ACR6	ACT domain repeat 6,[Source:TAIR;Acc:AT3G01990]	0.499048	0.520772
AT3G02840	AT3G02840	ARM repeat superfamily protein,[Source:TAIR;Acc:AT3G02840]	0.534657	0.225164
AT3G03130	AT3G03130	unknown protein,[Source:TAIR;Acc:AT3G03130]	0.519418	0.466756
AT3G03500	AT3G03500	TatD related DNase,[Source:TAIR;Acc:AT3G03500]	0.564124	0.369588
AT3G04320	AT3G04320	Kunitz family trypsin and protease inhibitor protein,[Source:TAIR;Acc:AT3G04320]	0.621748	0.477355
AT3G04960	AT3G04960	Domain of unknown function (DUF3444),[Source:TAIR;Acc:AT3G04960]	0.5296	0.343696
AT3G05600	AT3G05600	alpha/beta-Hydrolases superfamily protein,[Source:TAIR;Acc:AT3G05600]	0.542805	0.172545
AT3G05727	AT3G05727	S locus-related glycoprotein 1 (SLR1) binding pollen coat protein family,[Source:TAIR;Acc:AT3G05727]	0.427062	0.00764271
AT3G05890	RCI2B	Low temperature and salt responsive protein family,[Source:TAIR;Acc:AT3G05890]	0.426692	0.287139
AT3G06035	AT3G06035	Glycoprotein membrane precursor GPI-anchored,[Source:TAIR;Acc:AT3G06035]	0.63517	0.315676
AT3G06370	NHX4	sodium hydrogen exchanger 4,[Source:TAIR;Acc:AT3G06370]	0.463341	0.418909
AT3G06990	AT3G06990	Cysteine/Histidine-rich C1 domain family protein,[Source:TAIR;Acc:AT3G06990]	0.325618	0.351766
AT3G07070	AT3G07070	Protein kinase superfamily protein,[Source:TAIR;Acc:AT3G07070]	0.483535	0.343097
AT3G07540	AT3G07540	Actin-binding FH2 (formin homology 2) family protein,[Source:TAIR;Acc:AT3G07540]	3.28102	1.73418
AT3G08570	AT3G08570	Phototropic-responsive NPH3 family protein,[Source:TAIR;Acc:AT3G08570]	0.654176	0.428004
AT3G08770	LTP6	lipid transfer protein 6,[Source:TAIR;Acc:AT3G08770]	0.598791	0.158827
AT3G09032	AT3G09032	unknown protein,[Source:TAIR;Acc:AT3G09032]	0.44485	0.636432
AT3G09940	MDHAR	monodehydroascorbate reductase,[Source:TAIR;Acc:AT3G09940]	0.603645	0.22277
AT3G10020	AT3G10020	unknown protein,[Source:TAIR;Acc:AT3G10020]	1.54172	2.58824
AT3G10190	AT3G10190	Calcium-binding EF-hand family protein,[Source:TAIR;Acc:AT3G10190]	2.15674	2.24542
AT3G10310	AT3G10310	P-loop nucleoside triphosphate hydrolases superfamily protein with CH (Calponin Homology) domain,[Source:TAIR;Acc:AT3G10310]	0.556051	0.446563
AT3G10340	PAL4	phenylalanine ammonia-lyase 4,[Source:TAIR;Acc:AT3G10340]	0.544509	0.30034
AT3G10930	AT3G10930	unknown protein,[Source:TAIR;Acc:AT3G10930]	2.24369	3.21132
AT3G11340	AT3G11340	UDP-Glycosyltransferase superfamily protein,[Source:TAIR;Acc:AT3G11340]	0.451312	0.322409
AT3G11430	ATGPAT5	glycerol-3-phosphate acyltransferase 5,[Source:TAIR;Acc:AT3G11430]	0.418818	0.24849
AT3G11550	AT3G11550	Uncharacterised protein family (UPF0497),[Source:TAIR;Acc:AT3G11550]	0.414946	0.428647
AT3G12110	ACT11	actin-11,[Source:TAIR;Acc:AT3G12110]	0.562153	0.483285
AT3G12820	AtMYB10	myb domain protein 10,[Source:TAIR;Acc:AT3G12820]	0.529588	0.175891
AT3G12955	AT3G12955	SAUR-like auxin-responsive protein family,[Source:TAIR;Acc:AT3G12955]	0.471488	0.267343
AT3G13600	AT3G13600	calmodulin-binding family protein,[Source:TAIR;Acc:AT3G13600]	0.52127	0.298381
AT3G13610	AT3G13610	2-oxoglutarate (2OG) and Fe(II)-dependent oxygenase superfamily protein,[Source:TAIR;Acc:AT3G13610]	0.611563	0.261528
AT3G13960	AtGRF5	growth-regulating factor 5,[Source:TAIR;Acc:AT3G13960]	0.308907	0.149162
AT3G14550	GGPS3	geranylgeranyl pyrophosphate synthase 3,[Source:TAIR;Acc:AT3G14550]	0.57919	0.27279
AT3G15310	AT3G15310	transposable element gene,[Source:TAIR;Acc:AT3G15310]	0.235622	0.318291
AT3G15530	AT3G15530	S-adenosyl-L-methionine-dependent methyltransferases superfamily protein,[Source:TAIR;Acc:AT3G15530]	1.51615	2.31744
AT3G15550	AT3G15550	unknown protein,[Source:TAIR;Acc:AT3G15550]	0.592428	0.473661
AT3G15620	UVR3	DNA photolyase family protein,[Source:TAIR;Acc:AT3G15620]	1.61319	2.26406
AT3G15670	AT3G15670	Late embryogenesis abundant protein (LEA) family protein,[Source:TAIR;Acc:AT3G15670]	0.279385	0.413733
AT3G15720	AT3G15720	Pectin lyase-like superfamily protein,[Source:TAIR;Acc:AT3G15720]	2.28322	2.18232
AT3G15990	SULTR3;4	sulfate transporter 3;4,[Source:TAIR;Acc:AT3G15990]	0.527283	0.301501
AT3G16360	AHP4	HPT phosphotransmitter 4,[Source:TAIR;Acc:AT3G16360]	4.35547	2.02879
AT3G16650	AT3G16650	Transducin/WD40 repeat-like superfamily protein,[Source:TAIR;Acc:AT3G16650]	2.16232	1.65239
AT3G16770	RAP2,3	ethylene-responsive element binding protein,[Source:TAIR;Acc:AT3G16770]	1.85682	3.81892
AT3G17050	AT3G17050	transposable element gene,[Source:TAIR;Acc:AT3G17050]	1.66859	4.39332
AT3G17690	ATCNGC19	cyclic nucleotide gated channel 19,[Source:TAIR;Acc:AT3G17690]	4.05423	3.00026
AT3G18610	PARLL1	nucleolin like 2,[Source:TAIR;Acc:AT3G18610]	2.27088	5.0125
AT3G19150	KRP6	KIP-related protein 6,[Source:TAIR;Acc:AT3G19150]	1.88515	2.13678
AT3G19700	IKU2	Leucine-rich repeat protein kinase family protein,[Source:TAIR;Acc:AT3G19700]	0.649298	0.265789
AT3G19700	IKU2	Leucine-rich repeat protein kinase family protein,[Source:TAIR;Acc:AT3G19700]	0.652328	0.192015
AT3G20130	CYP705A22	cytochrome P450, family 705, subfamily A, polypeptide 22,[Source:TAIR;Acc:AT3G20130]	0.630167	0.381878
AT3G20160	AT3G20160	Terpenoid synthases superfamily protein,[Source:TAIR;Acc:AT3G20160]	0.508226	0.227296
AT3G20395	AT3G20395	RING/U-box superfamily protein,[Source:TAIR;Acc:AT3G20395]	1.52902	5.05757
AT3G20470	GRP-5	glycine-rich protein 5,[Source:TAIR;Acc:AT3G20470]	2.75553	3.3651
AT3G20865	AGP40	arabinogalactan protein 40,[Source:TAIR;Acc:AT3G20865]	0.514828	0.290598
AT3G20940	CYP705A30	cytochrome P450, family 705, subfamily A, polypeptide 30,[Source:TAIR;Acc:AT3G20940]	0.321774	0.25806
AT3G21030	AT3G21030	transposable element gene,[Source:TAIR;Acc:AT3G21030]	1.78726	5.48909
AT3G21090	AT3G21090	ABC-2 type transporter family protein,[Source:TAIR;Acc:AT3G21090]	2.38302	4.39284
AT3G21180	ACA9	autoinhibited Ca(2+)-ATPase 9,[Source:TAIR;Acc:AT3G21180]	0.322356	0.235025
AT3G21310	AT3G21310	Core-2/I-branching beta-1,6-N-acetylglucosaminyltransferase family protein,[Source:TAIR;Acc:AT3G21310]	1.8976	2.2765
AT3G21330	AT3G21330	basic helix-loop-helix (bHLH) DNA-binding superfamily protein,[Source:TAIR;Acc:AT3G21330]	0.580936	0.310384
AT3G21360	AT3G21360	2-oxoglutarate (2OG) and Fe(II)-dependent oxygenase superfamily protein,[Source:TAIR;Acc:AT3G21360]	6.85877	4.17652
AT3G21380	AT3G21380	Mannose-binding lectin superfamily protein,[Source:TAIR;Acc:AT3G21380]	22.2407	11.4532
AT3G21680	AT3G21680	unknown protein,[Source:TAIR;Acc:AT3G21680]	0.480547	0.660947
AT3G21720	ICL	isocitrate lyase,[Source:TAIR;Acc:AT3G21720]	2.26131	2.78686
AT3G22142	AT3G22142	Bifunctional inhibitor/lipid-transfer protein/seed storage 2S albumin superfamily protein,[Source:TAIR;Acc:AT3G22142]	3.66341	2.20952
AT3G22540	AT3G22540	Protein of unknown function (DUF1677),[Source:TAIR;Acc:AT3G22540]	0.658454	0.400406
AT3G22550	AT3G22550	Protein of unknown function (DUF581),[Source:TAIR;Acc:AT3G22550]	2.04587	2.43403
AT3G22560	AT3G22560	Acyl-CoA N-acyltransferases (NAT) superfamily protein,[Source:TAIR;Acc:AT3G22560]	3.64048	3.34113
AT3G22570	AT3G22570	Bifunctional inhibitor/lipid-transfer protein/seed storage 2S albumin superfamily protein,[Source:TAIR;Acc:AT3G22570]	0.304488	0.213295
AT3G22600	AT3G22600	Bifunctional inhibitor/lipid-transfer protein/seed storage 2S albumin superfamily protein,[Source:TAIR;Acc:AT3G22600]	0.440597	0.337163
AT3G22620	AT3G22620	Bifunctional inhibitor/lipid-transfer protein/seed storage 2S albumin superfamily protein,[Source:TAIR;Acc:AT3G22620]	0.341168	0.245538
AT3G22640	PAP85	cupin family protein,[Source:TAIR;Acc:AT3G22640]	0.288336	0.509176
AT3G22910	AT3G22910	ATPase E1-E2 type family protein / haloacid dehalogenase-like hydrolase family protein,[Source:TAIR;Acc:AT3G22910]	4.73634	5.34653
AT3G23090	AT3G23090	TPX2 (targeting protein for Xklp2) protein family,[Source:TAIR;Acc:AT3G23090]	0.605061	0.316594
AT3G23100	XRCC4	homolog of human DNA ligase iv-binding protein XRCC4,[Source:TAIR;Acc:AT3G23100]	1.52462	2.40043
AT3G23175	AT3G23175	HR-like lesion-inducing protein-related,[Source:TAIR;Acc:AT3G23175]	0.655844	0.322823
AT3G24020	AT3G24020	Disease resistance-responsive (dirigent-like protein) family protein,[Source:TAIR;Acc:AT3G24020]	0.409095	0.358439
AT3G24300	AMT1;3	ammonium transporter 1;3,[Source:TAIR;Acc:AT3G24300]	0.500096	0.301157
AT3G24780	AT3G24780	Uncharacterised conserved protein UCP015417, vWA,[Source:TAIR;Acc:AT3G24780]	2.36829	2.95101
AT3G25190	AT3G25190	Vacuolar iron transporter (VIT) family protein,[Source:TAIR;Acc:AT3G25190]	0.645448	0.284666
AT3G25710	BHLH32	basic helix-loop-helix 32,[Source:TAIR;Acc:AT3G25710]	0.565461	0.390569
AT3G25820	TPS-CIN	terpene synthase-like sequence-1,8-cineole,[Source:TAIR;Acc:AT3G25820]	0.151792	0.180033
AT3G25830	ATTPS-CIN	terpene synthase-like sequence-1,8-cineole,[Source:TAIR;Acc:AT3G25830]	0.213864	0.177868
AT3G26610	AT3G26610	Pectin lyase-like superfamily protein,[Source:TAIR;Acc:AT3G26610]	0.427704	0.238699
AT3G26740	CCL	CCR-like,[Source:TAIR;Acc:AT3G26740]	1.58614	2.14467
AT3G26960	AT3G26960	Pollen Ole e 1 allergen and extensin family protein,[Source:TAIR;Acc:AT3G26960]	0.241767	0.477351
AT3G27025	AT3G27025	unknown protein,[Source:TAIR;Acc:AT3G27025]	5.6881	3.70653
AT3G27060	TSO2	Ferritin/ribonucleotide reductase-like family protein,[Source:TAIR;Acc:AT3G27060]	2.00832	2.04491
AT3G27150	AT3G27150	Galactose oxidase/kelch repeat superfamily protein,[Source:TAIR;Acc:AT3G27150]	0.321143	0.153227
AT3G27400	AT3G27400	Pectin lyase-like superfamily protein,[Source:TAIR;Acc:AT3G27400]	2.61738	4.49505
AT3G27620	AOX1C	alternative oxidase 1C,[Source:TAIR;Acc:AT3G27620]	3.75571	4.89251
AT3G27630	AT3G27630	unknown protein,[Source:TAIR;Acc:AT3G27630]	8.54705	7.09175
AT3G28290	AT14A	Protein of unknown function (DUF677),[Source:TAIR;Acc:AT3G28290]	2.68084	1.6067
AT3G28300	AT14A	Protein of unknown function (DUF677),[Source:TAIR;Acc:AT3G28300]	2.09518	1.78706
AT3G28540	AT3G28540	P-loop containing nucleoside triphosphate hydrolases superfamily protein,[Source:TAIR;Acc:AT3G28540]	3.39555	1.57539
AT3G28580	AT3G28580	P-loop containing nucleoside triphosphate hydrolases superfamily protein,[Source:TAIR;Acc:AT3G28580]	1.89608	20.9973
AT3G29250	AT3G29250	NAD(P)-binding Rossmann-fold superfamily protein,[Source:TAIR;Acc:AT3G29250]	0.627946	0.47737
AT3G29630	AT3G29630	UDP-Glycosyltransferase superfamily protein,[Source:TAIR;Acc:AT3G29630]	0.343248	0.184794
AT3G29642	AT3G29642	transposable element gene,[Source:TAIR;Acc:AT3G29642]	4.94416	2.8641
AT3G29780	RALFL27	ralf-like 27,[Source:TAIR;Acc:AT3G29780]	0.27032	0.238674
AT3G32920	AT3G32920	P-loop containing nucleoside triphosphate hydrolases superfamily protein,[Source:TAIR;Acc:AT3G32920]	3.93839	9.23155
AT3G42180	AT3G42180	Exostosin family protein,[Source:TAIR;Acc:AT3G42180]	0.648716	0.436466
AT3G42725	AT3G42725	Putative membrane lipoprotein,[Source:TAIR;Acc:AT3G42725]	2.44325	3.00026
AT3G43110	AT3G43110	unknown protein,[Source:TAIR;Acc:AT3G43110]	0.595732	0.181888
AT3G43190	SUS4	sucrose synthase 4,[Source:TAIR;Acc:AT3G43190]	0.292643	0.266444
AT3G44220	AT3G44220	Late embryogenesis abundant (LEA) hydroxyproline-rich glycoprotein family,[Source:TAIR;Acc:AT3G44220]	0.583486	0.196582
AT3G44300	NIT2	nitrilase 2,[Source:TAIR;Acc:AT3G44300]	1.55798	2.15559
AT3G44326	AT3G44326	F-box family protein,[Source:TAIR;Acc:AT3G44326]	0.261915	0.18538
AT3G44540	FAR4	fatty acid reductase 4,[Source:TAIR;Acc:AT3G44540]	0.490625	0.427985
AT3G44550	FAR5	fatty acid reductase 5,[Source:TAIR;Acc:AT3G44550]	0.55347	0.326896
AT3G45070	AT3G45070	P-loop containing nucleoside triphosphate hydrolases superfamily protein,[Source:TAIR;Acc:AT3G45070]	0.377537	0.163668
AT3G45160	AT3G45160	Putative membrane lipoprotein,[Source:TAIR;Acc:AT3G45160]	0.559806	0.354168
AT3G45430	AT3G45430	Concanavalin A-like lectin protein kinase family protein,[Source:TAIR;Acc:AT3G45430]	0.344226	0.294846
AT3G45680	AT3G45680	Major facilitator superfamily protein,[Source:TAIR;Acc:AT3G45680]	0.525606	0.477392
AT3G45700	AT3G45700	Major facilitator superfamily protein,[Source:TAIR;Acc:AT3G45700]	0.242388	0.0666095
AT3G45710	AT3G45710	Major facilitator superfamily protein,[Source:TAIR;Acc:AT3G45710]	0.395722	0.45024
AT3G45730	AT3G45730	unknown protein,[Source:TAIR;Acc:AT3G45730]	1.71671	3.62465
AT3G45840	AT3G45840	Cysteine/Histidine-rich C1 domain family protein,[Source:TAIR;Acc:AT3G45840]	0.534695	0.318251
AT3G46090	ZAT7	C2H2 and C2HC zinc fingers superfamily protein,[Source:TAIR;Acc:AT3G46090]	1.93772	2.86417
AT3G46220	AT3G46220	unknown protein,[Source:TAIR;Acc:AT3G46220]	3.45252	4.90785
AT3G47210	AT3G47210	Plant protein of unknown function (DUF247),[Source:TAIR;Acc:AT3G47210]	0.625006	0.347195
AT3G47380	AT3G47380	Plant invertase/pectin methylesterase inhibitor superfamily protein,[Source:TAIR;Acc:AT3G47380]	3.54338	2.01579
AT3G47980	AT3G47980	Integral membrane HPP family protein,[Source:TAIR;Acc:AT3G47980]	0.53806	0.22205
AT3G49160	AT3G49160	pyruvate kinase family protein,[Source:TAIR;Acc:AT3G49160]	0.268267	0.663455
AT3G49330	AT3G49330	Plant invertase/pectin methylesterase inhibitor superfamily protein,[Source:TAIR;Acc:AT3G49330]	0.393882	0.38785
AT3G49845	AT3G49845	unknown protein,[Source:TAIR;Acc:AT3G49845]	0.323302	0.303784
AT3G50400	AT3G50400	GDSL-like Lipase/Acylhydrolase superfamily protein,[Source:TAIR;Acc:AT3G50400]	0.287602	0.213188
AT3G50640	AT3G50640	unknown protein,[Source:TAIR;Acc:AT3G50640]	0.503641	0.308869
AT3G50930	BCS1	cytochrome BC1 synthesis,[Source:TAIR;Acc:AT3G50930]	2.62713	2.07793
AT3G50970	LTI30	dehydrin family protein,[Source:TAIR;Acc:AT3G50970]	0.483957	0.448339
AT3G51350	AT3G51350	Eukaryotic aspartyl protease family protein,[Source:TAIR;Acc:AT3G51350]	0.302209	0.207551
AT3G51710	AT3G51710	D-mannose binding lectin protein with Apple-like carbohydrate-binding domain,[Source:TAIR;Acc:AT3G51710]	0.617811	0.412886
AT3G51750	AT3G51750	unknown protein,[Source:TAIR;Acc:AT3G51750]	0.532851	0.487521
AT3G51810	ATEM1	Stress induced protein,[Source:TAIR;Acc:AT3G51810]	0.0874327	0.381792
AT3G52535	AT3G52535	other RNA,[Source:TAIR;Acc:AT3G52535]	0.447405	0.636482
AT3G52742	AT3G52742	other RNA,[Source:TAIR;Acc:AT3G52742]	0.638417	0.450825
AT3G52780	ATPAP20	Purple acid phosphatases superfamily protein,[Source:TAIR;Acc:AT3G52780]	4.47891	2.67326
AT3G53040	AT3G53040	late embryogenesis abundant protein, putative / LEA protein, putative,[Source:TAIR;Acc:AT3G53040]	2.58628	1.8227
AT3G53090	UPL7	ubiquitin-protein ligase 7,[Source:TAIR;Acc:AT3G53090]	0.564774	0.463326
AT3G53210	AT3G53210	nodulin MtN21 /EamA-like transporter family protein,[Source:TAIR;Acc:AT3G53210]	1.98582	2.22769
AT3G53240	AtRLP45	receptor like protein 45,[Source:TAIR;Acc:AT3G53240]	0.643255	0.460885
AT3G53980	AT3G53980	Bifunctional inhibitor/lipid-transfer protein/seed storage 2S albumin superfamily protein,[Source:TAIR;Acc:AT3G53980]	0.654981	0.296656
AT3G54770	AT3G54770	RNA-binding (RRM/RBD/RNP motifs) family protein,[Source:TAIR;Acc:AT3G54770]	0.523788	0.198906
AT3G54820	PIP2D	plasma membrane intrinsic protein 2;5,[Source:TAIR;Acc:AT3G54820]	2.16235	1.50281
AT3G55230	AT3G55230	Disease resistance-responsive (dirigent-like protein) family protein,[Source:TAIR;Acc:AT3G55230]	0.416815	0.397515
AT3G55660	ATROPGEF6	ROP (rho of plants) guanine nucleotide exchange factor 6,[Source:TAIR;Acc:AT3G55660]	0.513263	0.349299
AT3G56230	AT3G56230	BTB/POZ domain-containing protein,[Source:TAIR;Acc:AT3G56230]	0.602379	0.340987
AT3G56880	AT3G56880	VQ motif-containing protein,[Source:TAIR;Acc:AT3G56880]	1.81742	2.09819
AT3G56970	BHLH038	basic helix-loop-helix (bHLH) DNA-binding superfamily protein,[Source:TAIR;Acc:AT3G56970]	0.394905	0.252141
AT3G56980	BHLH039	basic helix-loop-helix (bHLH) DNA-binding superfamily protein,[Source:TAIR;Acc:AT3G56980]	0.357714	0.378778
AT3G57010	AT3G57010	Calcium-dependent phosphotriesterase superfamily protein,[Source:TAIR;Acc:AT3G57010]	0.292333	0.278881
AT3G57160	AT3G57160	unknown protein,[Source:TAIR;Acc:AT3G57160]	0.379152	0.329239
AT3G57640	AT3G57640	Protein kinase superfamily protein,[Source:TAIR;Acc:AT3G57640]	1.54453	3.69912
AT3G58270	AT3G58270	Arabidopsis phospholipase-like protein (PEARLI 4) with TRAF-like domain,[Source:TAIR;Acc:AT3G58270]	3.49064	6.93443
AT3G60328	AT3G60328	unknown protein,[Source:TAIR;Acc:AT3G60328]	0.534943	0.34405
AT3G61198	AT3G61198	other RNA,[Source:TAIR;Acc:AT3G61198]	1.70713	3.10901
AT3G61300	AT3G61300	C2 calcium/lipid-binding plant phosphoribosyltransferase family protein,[Source:TAIR;Acc:AT3G61300]	0.556063	0.40917
AT3G61630	CRF6	cytokinin response factor 6,[Source:TAIR;Acc:AT3G61630]	1.66214	2.41865
AT3G62550	AT3G62550	Adenine nucleotide alpha hydrolases-like superfamily protein,[Source:TAIR;Acc:AT3G62550]	2.34775	2.81109
AT3G62690	ATL5	AtL5,[Source:TAIR;Acc:AT3G62690]	0.640697	0.477369
AT3G63430	AT3G63430	unknown protein,[Source:TAIR;Acc:AT3G63430]	0.655844	0.326642
AT4G00080	UNE11	Plant invertase/pectin methylesterase inhibitor superfamily protein,[Source:TAIR;Acc:AT4G00080]	0.433056	0.373592
AT4G00480	ATMYC1	basic helix-loop-helix (bHLH) DNA-binding superfamily protein,[Source:TAIR;Acc:AT4G00480]	0.445544	0.666514
AT4G00910	AT4G00910	Aluminium activated malate transporter family protein,[Source:TAIR;Acc:AT4G00910]	0.413702	0.224068
AT4G01110	AT4G01110	unknown protein,[Source:TAIR;Acc:AT4G01110]	0.585337	0.303811
AT4G01440	AT4G01440	nodulin MtN21 /EamA-like transporter family protein,[Source:TAIR;Acc:AT4G01440]	0.448423	0.344767
AT4G02090	AT4G02090	unknown protein,[Source:TAIR;Acc:AT4G02090]	0.376055	0.340969
AT4G02330	ATPMEPCRB	Plant invertase/pectin methylesterase inhibitor superfamily,[Source:TAIR;Acc:AT4G02330]	2.47604	2.50664
AT4G02390	APP	poly(ADP-ribose) polymerase,[Source:TAIR;Acc:AT4G02390]	3.14849	3.06307
AT4G02810	AT4G02810	Protein of unknown function (DUF3049),[Source:TAIR;Acc:AT4G02810]	0.301748	0.190963
AT4G03420	AT4G03420	Protein of unknown function (DUF789),[Source:TAIR;Acc:AT4G03420]	1.7598	2.01267
AT4G03540	AT4G03540	Uncharacterised protein family (UPF0497),[Source:TAIR;Acc:AT4G03540]	0.386161	0.31109
AT4G04223	AT4G04223	other RNA,[Source:TAIR;Acc:AT4G04223]	4.40176	2.19238
AT4G04810	ATMSRB4	methionine sulfoxide reductase B4,[Source:TAIR;Acc:AT4G04810]	0.658454	0.351735
AT4G04830	MSRB5	methionine sulfoxide reductase B5,[Source:TAIR;Acc:AT4G04830]	0.578856	0.437471
AT4G08115	AT4G08115	transposable element gene,[Source:TAIR;Acc:AT4G08115]	2.66413	1.54221
AT4G08160	AT4G08160	glycosyl hydrolase family 10 protein / carbohydrate-binding domain-containing protein,[Source:TAIR;Acc:AT4G08160]	0.60403	0.455675
AT4G08770	AT4G08770	Peroxidase superfamily protein,[Source:TAIR;Acc:AT4G08770]	0.503322	0.396109
AT4G09990	AT4G09990	Protein of unknown function (DUF579),[Source:TAIR;Acc:AT4G09990]	0.531324	0.400993
AT4G10150	AT4G10150	RING/U-box superfamily protein,[Source:TAIR;Acc:AT4G10150]	0.4965	0.249061
AT4G10310	HKT1	high-affinity K+ transporter 1,[Source:TAIR;Acc:AT4G10310]	0.561491	0.258391
AT4G10500	AT4G10500	2-oxoglutarate (2OG) and Fe(II)-dependent oxygenase superfamily protein,[Source:TAIR;Acc:AT4G10500]	0.397191	0.290048
AT4G11190	AT4G11190	Disease resistance-responsive (dirigent-like protein) family protein,[Source:TAIR;Acc:AT4G11190]	0.185352	0.267343
AT4G11290	AT4G11290	Peroxidase superfamily protein,[Source:TAIR;Acc:AT4G11290]	0.444828	0.217171
AT4G11320	AT4G11320	Papain family cysteine protease,[Source:TAIR;Acc:AT4G11320]	0.197721	0.102033
AT4G11650	ATOSM34	osmotin 34,[Source:TAIR;Acc:AT4G11650]	2.27939	1.70448
AT4G12050	AT4G12050	Predicted AT-hook DNA-binding family protein,[Source:TAIR;Acc:AT4G12050]	0.477847	0.497245
AT4G12735	AT4G12735	unknown protein,[Source:TAIR;Acc:AT4G12735]	5.32826	6.68306
AT4G13235	EDA21	embryo sac development arrest 21,[Source:TAIR;Acc:AT4G13235]	0.581477	0.360263
AT4G13690	AT4G13690	unknown protein,[Source:TAIR;Acc:AT4G13690]	1.56585	2.12154
AT4G13710	AT4G13710	Pectin lyase-like superfamily protein,[Source:TAIR;Acc:AT4G13710]	0.456004	0.274652
AT4G14010	RALFL32	ralf-like 32,[Source:TAIR;Acc:AT4G14010]	0.629423	0.488769
AT4G14130	XTR7	xyloglucan endotransglucosylase/hydrolase 15,[Source:TAIR;Acc:AT4G14130]	0.630689	0.455751
AT4G14365	XBAT34	XB3 ortholog 4 in Arabidopsis thaliana,[Source:TAIR;Acc:AT4G14365]	1.74314	5.09236
AT4G14650	AT4G14650	unknown protein,[Source:TAIR;Acc:AT4G14650]	0.424731	0.231436
AT4G15290	ATCSLB05	Cellulose synthase family protein,[Source:TAIR;Acc:AT4G15290]	0.178225	0.103216
AT4G15340	ATPEN1	pentacyclic triterpene synthase 1,[Source:TAIR;Acc:AT4G15340]	0.623158	0.321691
AT4G16240	AT4G16240	unknown protein,[Source:TAIR;Acc:AT4G16240]	2.673	3.81856
AT4G16745	AT4G16745	Exostosin family protein,[Source:TAIR;Acc:AT4G16745]	3.43434	4.06798
AT4G16770	AT4G16770	2-oxoglutarate (2OG) and Fe(II)-dependent oxygenase superfamily protein,[Source:TAIR;Acc:AT4G16770]	3.70693	1.80502
AT4G17215	AT4G17215	Pollen Ole e 1 allergen and extensin family protein,[Source:TAIR;Acc:AT4G17215]	0.507074	0.441256
AT4G17270	AT4G17270	Mo25 family protein,[Source:TAIR;Acc:AT4G17270]	0.443731	0.329638
AT4G17710	HDG4	homeodomain GLABROUS 4,[Source:TAIR;Acc:AT4G17710]	14.8268	13.3701
AT4G18170	WRKY28	WRKY DNA-binding protein 28,[Source:TAIR;Acc:AT4G18170]	2.71388	4.61439
AT4G18210	ATPUP10	purine permease 10,[Source:TAIR;Acc:AT4G18210]	1.5971	2.09625
AT4G18770	MYB98	myb domain protein 98,[Source:TAIR;Acc:AT4G18770]	0.554926	0.434364
AT4G18770	MYB98	myb domain protein 98,[Source:TAIR;Acc:AT4G18770]	0.386171	0.212168
AT4G18910	NIP1;2	NOD26-like intrinsic protein 1;2,[Source:TAIR;Acc:AT4G18910]	1.76547	2.45162
AT4G19420	AT4G19420	Pectinacetylesterase family protein,[Source:TAIR;Acc:AT4G19420]	1.97126	2.45393
AT4G19570	AT4G19570	Chaperone DnaJ-domain superfamily protein,[Source:TAIR;Acc:AT4G19570]	8.03363	5.31894
AT4G20240	CYP71A27	cytochrome P450, family 71, subfamily A, polypeptide 27,[Source:TAIR;Acc:AT4G20240]	0.257423	0.160185
AT4G21070	ATBRCA1	breast cancer susceptibility1,[Source:TAIR;Acc:AT4G21070]	2.13451	2.17796
AT4G21326	ATSBT3,12	subtilase 3,12,[Source:TAIR;Acc:AT4G21326]	1.92663	4.21938
AT4G21650	AT4G21650	Subtilase family protein,[Source:TAIR;Acc:AT4G21650]	0.387281	0.17785
AT4G21670	CPL1	C-terminal domain phosphatase-like 1,[Source:TAIR;Acc:AT4G21670]	2.59481	3.34153
AT4G21820	AT4G21820	binding;calmodulin binding,[Source:TAIR;Acc:AT4G21820]	0.35643	0.537052
AT4G21830	ATMSRB7	methionine sulfoxide reductase B7,[Source:TAIR;Acc:AT4G21830]	0.17279	0.0839265
AT4G21850	ATMSRB9	methionine sulfoxide reductase B9,[Source:TAIR;Acc:AT4G21850]	0.589523	0.334702
AT4G21940	CPK15	calcium-dependent protein kinase 15,[Source:TAIR;Acc:AT4G21940]	1.86649	2.52548
AT4G22212	AT4G22212	Arabidopsis defensin-like protein,[Source:TAIR;Acc:AT4G22212]	0.4444	0.279921
AT4G22390	AT4G22390	F-box associated ubiquitination effector family protein,[Source:TAIR;Acc:AT4G22390]	1.80188	4.39187
AT4G22460	AT4G22460	Bifunctional inhibitor/lipid-transfer protein/seed storage 2S albumin superfamily protein,[Source:TAIR;Acc:AT4G22460]	0.193085	0.126107
AT4G22470	AT4G22470	protease inhibitor/seed storage/lipid transfer protein (LTP) family protein,[Source:TAIR;Acc:AT4G22470]	1.59118	13.0718
AT4G22485	AT4G22485	Bifunctional inhibitor/lipid-transfer protein/seed storage 2S albumin superfamily protein,[Source:TAIR;Acc:AT4G22485]	0.619547	0
AT4G22490	AT4G22490	Bifunctional inhibitor/lipid-transfer protein/seed storage 2S albumin superfamily protein,[Source:TAIR;Acc:AT4G22490]	0.40396	0.00288623
AT4G22505	AT4G22505	Bifunctional inhibitor/lipid-transfer protein/seed storage 2S albumin superfamily protein,[Source:TAIR;Acc:AT4G22505]	0.542085	0.000932042
AT4G22510	AT4G22510	unknown protein,[Source:TAIR;Acc:AT4G22510]	0.534658	0
AT4G22513	AT4G22513	Bifunctional inhibitor/lipid-transfer protein/seed storage 2S albumin superfamily protein,[Source:TAIR;Acc:AT4G22513]	0.473706	0
AT4G22513	AT4G22513	Bifunctional inhibitor/lipid-transfer protein/seed storage 2S albumin superfamily protein,[Source:TAIR;Acc:AT4G22513]	0.452396	0
AT4G22520	AT4G22520	Bifunctional inhibitor/lipid-transfer protein/seed storage 2S albumin superfamily protein,[Source:TAIR;Acc:AT4G22520]	0.517249	0.019497
AT4G22666	AT4G22666	Bifunctional inhibitor/lipid-transfer protein/seed storage 2S albumin superfamily protein,[Source:TAIR;Acc:AT4G22666]	0.312919	0.137064
AT4G22960	AT4G22960	Protein of unknown function (DUF544),[Source:TAIR;Acc:AT4G22960]	13.7175	44.8579
AT4G23170	EP1	receptor-like protein kinase-related family protein,[Source:TAIR;Acc:AT4G23170]	2.43271	1.76252
AT4G23220	CRK14	cysteine-rich RLK (RECEPTOR-like protein kinase) 14,[Source:TAIR;Acc:AT4G23220]	2.07153	2.22791
AT4G23600	CORI3	Tyrosine transaminase family protein,[Source:TAIR;Acc:AT4G23600]	1.81667	5.41001
AT4G23720	AT4G23720	Protein of unknown function (DUF1191),[Source:TAIR;Acc:AT4G23720]	6.88499	1.59115
AT4G23750	CRF2	cytokinin response factor 2,[Source:TAIR;Acc:AT4G23750]	0.528432	0.499265
AT4G24260	ATGH9A3	glycosyl hydrolase 9A3,[Source:TAIR;Acc:AT4G24260]	1.88772	2.00504
AT4G24310	AT4G24310	Protein of unknown function (DUF679),[Source:TAIR;Acc:AT4G24310]	0.502022	0.252725
AT4G24340	AT4G24340	Phosphorylase superfamily protein,[Source:TAIR;Acc:AT4G24340]	0.282062	0.358021
AT4G25090	AT4G25090	Riboflavin synthase-like superfamily protein,[Source:TAIR;Acc:AT4G25090]	0.642864	0.379776
AT4G25250	AT4G25250	Plant invertase/pectin methylesterase inhibitor superfamily protein,[Source:TAIR;Acc:AT4G25250]	0.4965	0.18282
AT4G27400	AT4G27400	Late embryogenesis abundant (LEA) protein-related,[Source:TAIR;Acc:AT4G27400]	0.612849	0.310837
AT4G28110	AT4G28110	AtMYB41 (myb domain protein 41); DNA binding	0.529524	0.224627
AT4G28410	AT4G28410	Tyrosine transaminase family protein,[Source:TAIR;Acc:AT4G28410]	0.42124	0.401993
AT4G29190	AT4G29190	Zinc finger C-x8-C-x5-C-x3-H type family protein,[Source:TAIR;Acc:AT4G29190]	1.59757	2.2707
AT4G29270	AT4G29270	HAD superfamily, subfamily IIIB acid phosphatase,[Source:TAIR;Acc:AT4G29270]	0.488634	0.449289
AT4G29360	AT4G29360	O-Glycosyl hydrolases family 17 protein,[Source:TAIR;Acc:AT4G29360]	0.587481	0.459358
AT4G29690	AT4G29690	Alkaline-phosphatase-like family protein,[Source:TAIR;Acc:AT4G29690]	0.268701	0.330016
AT4G29930	AT4G29930	basic helix-loop-helix (bHLH) DNA-binding superfamily protein,[Source:TAIR;Acc:AT4G29930]	0.33576	0.250037
AT4G31320	AT4G31320	SAUR-like auxin-responsive protein family,[Source:TAIR;Acc:AT4G31320]	0.560352	0.108263
AT4G31805	AT4G31805	WRKY family transcription factor,[Source:TAIR;Acc:AT4G31805]	0.500261	0.418509
AT4G33550	AT4G33550	Bifunctional inhibitor/lipid-transfer protein/seed storage 2S albumin superfamily protein,[Source:TAIR;Acc:AT4G33550]	0.470714	0.312558
AT4G33720	AT4G33720	CAP (Cysteine-rich secretory proteins, Antigen 5, and Pathogenesis-related 1 protein) superfamily protein,[Source:TAIR;Acc:AT4G33720]	0.571272	0.0414972
AT4G33790	CER4	Jojoba acyl CoA reductase-related male sterility protein,[Source:TAIR;Acc:AT4G33790]	0.347547	0.188252
AT4G34320	AT4G34320	Protein of unknown function (DUF677),[Source:TAIR;Acc:AT4G34320]	7.72249	2.2765
AT4G35160	AT4G35160	O-methyltransferase family protein,[Source:TAIR;Acc:AT4G35160]	0.400442	0.172902
AT4G35770	SEN1	Rhodanese/Cell cycle control phosphatase superfamily protein,[Source:TAIR;Acc:AT4G35770]	1.63104	2.24086
AT4G36230	AT4G36230	unknown protein,[Source:TAIR;Acc:AT4G36230]	0.586298	0.303811
AT4G36430	AT4G36430	Peroxidase superfamily protein,[Source:TAIR;Acc:AT4G36430]	1.70198	3.94456
AT4G36600	AT4G36600	Late embryogenesis abundant (LEA) protein,[Source:TAIR;Acc:AT4G36600]	0.165042	0
AT4G36610	AT4G36610	alpha/beta-Hydrolases superfamily protein,[Source:TAIR;Acc:AT4G36610]	0.458872	0.271601
AT4G36700	AT4G36700	RmlC-like cupins superfamily protein,[Source:TAIR;Acc:AT4G36700]	0.473087	0.156944
AT4G37160	AT4G37160	sks15 (SKU5 Similar 15); copper ion binding	0.566954	0.325482
AT4G37390	YDK1	Auxin-responsive GH3 family protein,[Source:TAIR;Acc:AT4G37390]	0.457182	0.209019
AT4G37400	CYP81F3	cytochrome P450, family 81, subfamily F, polypeptide 3,[Source:TAIR;Acc:AT4G37400]	0.410407	0.208872
AT4G37409	AT4G37409	unknown protein,[Source:TAIR;Acc:AT4G37409]	0.32372	0.158718
AT4G37409	AT4G37409	unknown protein,[Source:TAIR;Acc:AT4G37409]	0.32372	0.158718
AT4G37870	PCK1	phosphoenolpyruvate carboxykinase 1,[Source:TAIR;Acc:AT4G37870]	1.68767	2.0035
AT4G38080	AT4G38080	hydroxyproline-rich glycoprotein family protein,[Source:TAIR;Acc:AT4G38080]	0.577567	0.44554
AT4G38210	ATEXPA20	expansin A20,[Source:TAIR;Acc:AT4G38210]	1.79393	2.50895
AT4G38390	RHS17	root hair specific 17,[Source:TAIR;Acc:AT4G38390]	0.390224	0.537052
AT4G38780	AT4G38780	Pre-mRNA-processing-splicing factor,[Source:TAIR;Acc:AT4G38780]	1.9451	3.69434
AT4G39830	AT4G39830	Cupredoxin superfamily protein,[Source:TAIR;Acc:AT4G39830]	1.79895	2.98313
AT4G39950	CYP79B2	cytochrome P450, family 79, subfamily B, polypeptide 2,[Source:TAIR;Acc:AT4G39950]	0.542421	0.285094
AT5G01010	AT5G01010	No description	0.488893	0.495459
AT5G01015	AT5G01015	unknown protein,[Source:TAIR;Acc:AT5G01015]	0.267723	0.0799507
AT5G01050	AT5G01050	Laccase/Diphenol oxidase family protein,[Source:TAIR;Acc:AT5G01050]	0.585337	0.463709
AT5G01335	AT5G01335	transposable element gene,[Source:TAIR;Acc:AT5G01335]	2.50995	6.68281
AT5G01540	LECRKA4,1	lectin receptor kinase a4,1,[Source:TAIR;Acc:AT5G01540]	2.36979	1.82984
AT5G01540	LECRKA4,1	lectin receptor kinase a4,1,[Source:TAIR;Acc:AT5G01540]	2.34943	1.82984
AT5G01595	AT5G01595	other RNA,[Source:TAIR;Acc:AT5G01595]	0.565691	0.419371
AT5G01595	AT5G01595	other RNA,[Source:TAIR;Acc:AT5G01595]	0.5601	0.415315
AT5G02550	AT5G02550	unknown protein,[Source:TAIR;Acc:AT5G02550]	0.529542	0.31058
AT5G02780	GSTL1	glutathione transferase lambda 1,[Source:TAIR;Acc:AT5G02780]	0.505484	0.120599
AT5G03495	AT5G03495	RNA-binding (RRM/RBD/RNP motifs) family protein,[Source:TAIR;Acc:AT5G03495]	1.93077	4.20097
AT5G03780	TRFL10	TRF-like 10,[Source:TAIR;Acc:AT5G03780]	2.87428	2.33979
AT5G03860	MLS	malate synthase,[Source:TAIR;Acc:AT5G03860]	1.8657	3.76465
AT5G03870	AT5G03870	Glutaredoxin family protein,[Source:TAIR;Acc:AT5G03870]	0.658836	0.417707
AT5G03960	IQD12	IQ-domain 12,[Source:TAIR;Acc:AT5G03960]	0.381619	0.168483
AT5G04970	AT5G04970	Plant invertase/pectin methylesterase inhibitor superfamily,[Source:TAIR;Acc:AT5G04970]	0.498409	0.119337
AT5G05340	AT5G05340	Peroxidase superfamily protein,[Source:TAIR;Acc:AT5G05340]	4.86513	2.86405
AT5G05390	LAC12	laccase 12,[Source:TAIR;Acc:AT5G05390]	0.532851	0.374396
AT5G05420	AT5G05420	FKBP-like peptidyl-prolyl cis-trans isomerase family protein,[Source:TAIR;Acc:AT5G05420]	2.1624	2.60722
AT5G05510	AT5G05510	Mad3/BUB1 homology region 1,[Source:TAIR;Acc:AT5G05510]	0.523159	0.413733
AT5G06090	ATGPAT7	glycerol-3-phosphate acyltransferase 7,[Source:TAIR;Acc:AT5G06090]	0.280195	0.329833
AT5G06200	AT5G06200	Uncharacterised protein family (UPF0497),[Source:TAIR;Acc:AT5G06200]	0.280837	0.312113
AT5G06610	AT5G06610	Protein of unknown function (DUF620),[Source:TAIR;Acc:AT5G06610]	0.599659	0.459685
AT5G06720	ATPA2	peroxidase 2,[Source:TAIR;Acc:AT5G06720]	4.27727	3.81894
AT5G06760	LEA4-5	Late Embryogenesis Abundant 4-5,[Source:TAIR;Acc:AT5G06760]	0.607162	0.489597
AT5G06870	PGIP2	polygalacturonase inhibiting protein 2,[Source:TAIR;Acc:AT5G06870]	2.47125	2.9737
AT5G07030	AT5G07030	Eukaryotic aspartyl protease family protein,[Source:TAIR;Acc:AT5G07030]	0.389673	0.237131
AT5G07330	AT5G07330	unknown protein,[Source:TAIR;Acc:AT5G07330]	0.353058	0.272844
AT5G07475	AT5G07475	Cupredoxin superfamily protein,[Source:TAIR;Acc:AT5G07475]	0.500136	0.31083
AT5G07610	AT5G07610	F-box family protein,[Source:TAIR;Acc:AT5G07610]	3.45407	3.14713
AT5G07620	AT5G07620	Protein kinase superfamily protein,[Source:TAIR;Acc:AT5G07620]	1.97704	2.7583
AT5G07690	MYB29	myb domain protein 29,[Source:TAIR;Acc:AT5G07690]	0.542047	0.129962
AT5G07790	AT5G07790	unknown protein,[Source:TAIR;Acc:AT5G07790]	1.52639	2.39356
AT5G08250	AT5G08250	Cytochrome P450 superfamily protein,[Source:TAIR;Acc:AT5G08250]	0.098595	0.30498
AT5G08260	scpl35	serine carboxypeptidase-like 35,[Source:TAIR;Acc:AT5G08260]	1.78073	2.85005
AT5G09220	AAP2	amino acid permease 2,[Source:TAIR;Acc:AT5G09220]	0.570016	0.249362
AT5G09290	AT5G09290	Inositol monophosphatase family protein,[Source:TAIR;Acc:AT5G09290]	0.431025	0.268526
AT5G09520	AT5G09520	hydroxyproline-rich glycoprotein family protein,[Source:TAIR;Acc:AT5G09520]	0.236407	0.213043
AT5G09530	AT5G09530	hydroxyproline-rich glycoprotein family protein,[Source:TAIR;Acc:AT5G09530]	0.579962	0.297462
AT5G09978	PEP7	elicitor peptide 7 precursor,[Source:TAIR;Acc:AT5G09978]	0.42128	0.464478
AT5G10120	AT5G10120	Ethylene insensitive 3 family protein,[Source:TAIR;Acc:AT5G10120]	2.35251	3.34083
AT5G10140	FLC	K-box region and MADS-box transcription factor family protein,[Source:TAIR;Acc:AT5G10140]	2.25095	1.90968
AT5G10230	ANNAT7	annexin 7,[Source:TAIR;Acc:AT5G10230]	0.2979	0.24319
AT5G10430	AGP4	arabinogalactan protein 4,[Source:TAIR;Acc:AT5G10430]	0.427726	0.27278
AT5G11920	AtcwINV6	6-&1-fructan exohydrolase,[Source:TAIR;Acc:AT5G11920]	0.22467	0.293768
AT5G12020	HSP17,6II	17,6 kDa class II heat shock protein,[Source:TAIR;Acc:AT5G12020]	2.67994	3.20747
AT5G12030	AT-HSP17,6A	heat shock protein 17,6A,[Source:TAIR;Acc:AT5G12030]	2.2306	8.76619
AT5G12420	AT5G12420	O-acyltransferase (WSD1-like) family protein,[Source:TAIR;Acc:AT5G12420]	0.556772	0.353694
AT5G13330	Rap2,6L	related to AP2 6l,[Source:TAIR;Acc:AT5G13330]	2.26785	3.69382
AT5G13580	AT5G13580	ABC-2 type transporter family protein,[Source:TAIR;Acc:AT5G13580]	0.307923	0.250541
AT5G13870	EXGT-A4	xyloglucan endotransglucosylase/hydrolase 5,[Source:TAIR;Acc:AT5G13870]	0.360399	0.455158
AT5G13900	AT5G13900	Bifunctional inhibitor/lipid-transfer protein/seed storage 2S albumin superfamily protein,[Source:TAIR;Acc:AT5G13900]	0.298254	0.229839
AT5G14120	AT5G14120	Major facilitator superfamily protein,[Source:TAIR;Acc:AT5G14120]	0.614451	0.474632
AT5G14150	AT5G14150	Protein of unknown function, DUF642,[Source:TAIR;Acc:AT5G14150]	0.546501	0.390579
AT5G14180	MPL1	Myzus persicae-induced lipase 1,[Source:TAIR;Acc:AT5G14180]	2.83801	2.95093
AT5G14200	ATIMD1	isopropylmalate dehydrogenase 1,[Source:TAIR;Acc:AT5G14200]	0.664688	0.386849
AT5G14330	AT5G14330	unknown protein,[Source:TAIR;Acc:AT5G14330]	0.409038	0.389492
AT5G14650	AT5G14650	Pectin lyase-like superfamily protein,[Source:TAIR;Acc:AT5G14650]	1.5569	2.65981
AT5G14810	AT5G14810	transposable element gene,[Source:TAIR;Acc:AT5G14810]	1.75591	2.19593
AT5G14920	AT5G14920	Gibberellin-regulated family protein,[Source:TAIR;Acc:AT5G14920]	2.16285	1.96822
AT5G14930	SAG101	senescence-associated gene 101,[Source:TAIR;Acc:AT5G14930]	2.4029	4.02533
AT5G15180	AT5G15180	Peroxidase superfamily protein,[Source:TAIR;Acc:AT5G15180]	0.552461	0.160912
AT5G15265	AT5G15265	unknown protein,[Source:TAIR;Acc:AT5G15265]	0.278021	0.190945
AT5G15290	AT5G15290	Uncharacterised protein family (UPF0497),[Source:TAIR;Acc:AT5G15290]	0.0712926	0.216165
AT5G15530	BCCP2	biotin carboxyl carrier protein 2,[Source:TAIR;Acc:AT5G15530]	0.359106	0.59802
AT5G16080	AtCXE17	carboxyesterase 17,[Source:TAIR;Acc:AT5G16080]	3.97951	9.49673
AT5G16530	PIN5	Auxin efflux carrier family protein,[Source:TAIR;Acc:AT5G16530]	0.585337	0.190918
AT5G18270	ANAC087	Arabidopsis NAC domain containing protein 87,[Source:TAIR;Acc:AT5G18270]	4.04394	2.58813
AT5G18860	AT5G18860	inosine-uridine preferring nucleoside hydrolase family protein,[Source:TAIR;Acc:AT5G18860]	0.469847	0.408166
AT5G18930	BUD2	Adenosylmethionine decarboxylase family protein,[Source:TAIR;Acc:AT5G18930]	0.617776	0.372183
AT5G19040	ATIPT5	isopentenyltransferase 5,[Source:TAIR;Acc:AT5G19040]	0.586029	0.27109
AT5G19410	AT5G19410	ABC-2 type transporter family protein,[Source:TAIR;Acc:AT5G19410]	0.539185	0.455675
AT5G19530	ACL5	S-adenosyl-L-methionine-dependent methyltransferases superfamily protein,[Source:TAIR;Acc:AT5G19530]	0.660136	0.347931
AT5G19800	AT5G19800	hydroxyproline-rich glycoprotein family protein,[Source:TAIR;Acc:AT5G19800]	0.282062	0.456586
AT5G19890	AT5G19890	Peroxidase superfamily protein,[Source:TAIR;Acc:AT5G19890]	0.128323	0.135009
AT5G20850	ATRAD51	RAS associated with diabetes protein 51,[Source:TAIR;Acc:AT5G20850]	2.78028	2.12647
AT5G22140	AT5G22140	FAD/NAD(P)-binding oxidoreductase family protein,[Source:TAIR;Acc:AT5G22140]	0.52609	0.429025
AT5G22270	AT5G22270	unknown protein,[Source:TAIR;Acc:AT5G22270]	1.52636	4.20063
AT5G22390	AT5G22390	Protein of unknown function (DUF3049),[Source:TAIR;Acc:AT5G22390]	0.560002	0.439677
AT5G22410	RHS18	root hair specific 18,[Source:TAIR;Acc:AT5G22410]	0.405424	0.337449
AT5G23190	CYP86B1	cytochrome P450, family 86, subfamily B, polypeptide 1,[Source:TAIR;Acc:AT5G23190]	0.34625	0.359684
AT5G23360	AT5G23360	GRAM domain-containing protein / ABA-responsive protein-related,[Source:TAIR;Acc:AT5G23360]	0.661939	0.381882
AT5G23370	AT5G23370	GRAM domain-containing protein / ABA-responsive protein-related,[Source:TAIR;Acc:AT5G23370]	0.599649	0.278459
AT5G23830	AT5G23830	MD-2-related lipid recognition domain-containing protein,[Source:TAIR;Acc:AT5G23830]	0.428493	0.217616
AT5G23840	AT5G23840	MD-2-related lipid recognition domain-containing protein,[Source:TAIR;Acc:AT5G23840]	0.0772342	0.106084
AT5G23940	EMB3009	HXXXD-type acyl-transferase family protein,[Source:TAIR;Acc:AT5G23940]	0.627723	0.270149
AT5G23990	ATFRO5	ferric reduction oxidase 5,[Source:TAIR;Acc:AT5G23990]	0.227881	0.141467
AT5G24280	GMI1	gamma-irradiation and mitomycin c induced 1,[Source:TAIR;Acc:AT5G24280]	1.92221	3.3677
AT5G24410	PGL4	6-phosphogluconolactonase 4,[Source:TAIR;Acc:AT5G24410]	0.529564	0.182533
AT5G24420	PGL5	6-phosphogluconolactonase 5,[Source:TAIR;Acc:AT5G24420]	0.500939	0.270685
AT5G24580	AT5G24580	Heavy metal transport/detoxification superfamily protein,[Source:TAIR;Acc:AT5G24580]	0.642965	0.393829
AT5G25010	AT5G25010	Protein of unknown function (DUF1336),[Source:TAIR;Acc:AT5G25010]	0.635439	0.358021
AT5G25190	AT5G25190	Integrase-type DNA-binding superfamily protein,[Source:TAIR;Acc:AT5G25190]	1.86519	3.07635
AT5G26190	AT5G26190	Cysteine/Histidine-rich C1 domain family protein,[Source:TAIR;Acc:AT5G26190]	2.54829	6.68506
AT5G26920	CBP60G	Cam-binding protein 60-like G,[Source:TAIR;Acc:AT5G26920]	1.96939	5.36991
AT5G28145	AT5G28145	transposable element gene,[Source:TAIR;Acc:AT5G28145]	1.51644	2.80457
AT5G35580	AT5G35580	Protein kinase superfamily protein,[Source:TAIR;Acc:AT5G35580]	0.457651	0.445531
AT5G35935	AT5G35935	transposable element gene,[Source:TAIR;Acc:AT5G35935]	3.20321	8.43788
AT5G35940	AT5G35940	Mannose-binding lectin superfamily protein,[Source:TAIR;Acc:AT5G35940]	0.313266	0.215022
AT5G36180	scpl1	serine carboxypeptidase-like 1,[Source:TAIR;Acc:AT5G36180]	0.480547	0.456586
AT5G38030	AT5G38030	MATE efflux family protein,[Source:TAIR;Acc:AT5G38030]	0.596878	0.337951
AT5G38420	AT5G38420	Ribulose bisphosphate carboxylase (small chain) family protein,[Source:TAIR;Acc:AT5G38420]	0.65712	0.402457
AT5G38550	AT5G38550	Mannose-binding lectin superfamily protein,[Source:TAIR;Acc:AT5G38550]	0.417926	0.356418
AT5G38565	AT5G38565	F-box/FBD-like domains containing protein,[Source:TAIR;Acc:AT5G38565]	2.19048	12.8849
AT5G38930	AT5G38930	RmlC-like cupins superfamily protein,[Source:TAIR;Acc:AT5G38930]	0.589792	0.130193
AT5G38940	AT5G38940	RmlC-like cupins superfamily protein,[Source:TAIR;Acc:AT5G38940]	0.596274	0.334358
AT5G39670	AT5G39670	Calcium-binding EF-hand family protein,[Source:TAIR;Acc:AT5G39670]	1.6117	6.30155
AT5G40730	AGP24	arabinogalactan protein 24,[Source:TAIR;Acc:AT5G40730]	0.632932	0.493514
AT5G41040	AT5G41040	HXXXD-type acyl-transferase family protein,[Source:TAIR;Acc:AT5G41040]	0.56271	0.470255
AT5G41750	AT5G41750	Disease resistance protein (TIR-NBS-LRR class) family,[Source:TAIR;Acc:AT5G41750]	3.10438	3.0006
AT5G41850	AT5G41850	alpha/beta-Hydrolases superfamily protein,[Source:TAIR;Acc:AT5G41850]	1.64751	2.73405
AT5G42180	AT5G42180	Peroxidase superfamily protein,[Source:TAIR;Acc:AT5G42180]	0.476004	0.362475
AT5G42460	AT5G42460	F-box and associated interaction domains-containing protein,[Source:TAIR;Acc:AT5G42460]	2.48122	1.74731
AT5G42500	AT5G42500	Disease resistance-responsive (dirigent-like protein) family protein,[Source:TAIR;Acc:AT5G42500]	0.365089	0.241699
AT5G42530	AT5G42530	unknown protein,[Source:TAIR;Acc:AT5G42530]	3.72848	1.79375
AT5G42590	CYP71A16	cytochrome P450, family 71, subfamily A, polypeptide 16,[Source:TAIR;Acc:AT5G42590]	0.543935	0.23869
AT5G42860	AT5G42860	unknown protein,[Source:TAIR;Acc:AT5G42860]	0.659934	0.287936
AT5G43040	AT5G43040	Cysteine/Histidine-rich C1 domain family protein,[Source:TAIR;Acc:AT5G43040]	0.231695	0.492803
AT5G43211	AT5G43211	unknown protein,[Source:TAIR;Acc:AT5G43211]	0.4303	0.280823
AT5G43980	PDLP1	plasmodesmata-located protein 1,[Source:TAIR;Acc:AT5G43980]	2.36472	3.819
AT5G44120	CRA1	RmlC-like cupins superfamily protein,[Source:TAIR;Acc:AT5G44120]	0.218068	0.294846
AT5G44310	AT5G44310	Late embryogenesis abundant protein (LEA) family protein,[Source:TAIR;Acc:AT5G44310]	0.120884	0.477361
AT5G44350	AT5G44350	ethylene-responsive nuclear protein -related,[Source:TAIR;Acc:AT5G44350]	0.317747	0.254648
AT5G44480	DUR	NAD(P)-binding Rossmann-fold superfamily protein,[Source:TAIR;Acc:AT5G44480]	0.591517	0.41482
AT5G44572	AT5G44572	unknown protein,[Source:TAIR;Acc:AT5G44572]	2.75121	3.4239
AT5G44980	AT5G44980	F-box/RNI-like/FBD-like domains-containing protein,[Source:TAIR;Acc:AT5G44980]	1.77609	2.7774
AT5G45150	RTL3	RNAse THREE-like protein 3,[Source:TAIR;Acc:AT5G45150]	2.66413	2.72758
AT5G45210	AT5G45210	Disease resistance protein (TIR-NBS-LRR class) family,[Source:TAIR;Acc:AT5G45210]	0.3972	0.249061
AT5G45700	AT5G45700	Haloacid dehalogenase-like hydrolase (HAD) superfamily protein,[Source:TAIR;Acc:AT5G45700]	0.620911	0.436923
AT5G45990	AT5G45990	crooked neck protein, putative / cell cycle protein, putative,[Source:TAIR;Acc:AT5G45990]	15.8883	16.5531
AT5G46700	TET1	Tetraspanin family protein,[Source:TAIR;Acc:AT5G46700]	2.11412	2.52804
AT5G46890	AT5G46890	Bifunctional inhibitor/lipid-transfer protein/seed storage 2S albumin superfamily protein,[Source:TAIR;Acc:AT5G46890]	0.150689	0.0173941
AT5G46900	AT5G46900	Bifunctional inhibitor/lipid-transfer protein/seed storage 2S albumin superfamily protein,[Source:TAIR;Acc:AT5G46900]	0.201261	0.0312718
AT5G47000	AT5G47000	Peroxidase superfamily protein,[Source:TAIR;Acc:AT5G47000]	4.26342	2.12967
AT5G47530	AT5G47530	Auxin-responsive family protein,[Source:TAIR;Acc:AT5G47530]	0.388625	0.472904
AT5G47630	mtACP3	mitochondrial acyl carrier protein 3,[Source:TAIR;Acc:AT5G47630]	0.637131	0.342713
AT5G47980	AT5G47980	HXXXD-type acyl-transferase family protein,[Source:TAIR;Acc:AT5G47980]	0.226049	0.110162
AT5G47990	CYP705A5	cytochrome P450, family 705, subfamily A, polypeptide 5,[Source:TAIR;Acc:AT5G47990]	0.273718	0.248762
AT5G48000	CYP708A2	cytochrome P450, family 708, subfamily A, polypeptide 2,[Source:TAIR;Acc:AT5G48000]	0.435638	0.477355
AT5G48010	THAS	thalianol synthase 1,[Source:TAIR;Acc:AT5G48010]	0.415106	0.348845
AT5G48430	AT5G48430	Eukaryotic aspartyl protease family protein,[Source:TAIR;Acc:AT5G48430]	0.560103	0.238682
AT5G48720	XRI	x-ray induced transcript 1,[Source:TAIR;Acc:AT5G48720]	2.43264	2.83289
AT5G48940	AT5G48940	Leucine-rich repeat transmembrane protein kinase family protein,[Source:TAIR;Acc:AT5G48940]	0.45665	0.613763
AT5G49360	BXL1	beta-xylosidase 1,[Source:TAIR;Acc:AT5G49360]	2.0327	1.58211
AT5G49520	WRKY48	WRKY DNA-binding protein 48,[Source:TAIR;Acc:AT5G49520]	4.08521	4.22811
AT5G49690	AT5G49690	UDP-Glycosyltransferase superfamily protein,[Source:TAIR;Acc:AT5G49690]	1.65493	3.18231
AT5G50010	AT5G50010	sequence-specific DNA binding transcription factors;transcription regulators,[Source:TAIR;Acc:AT5G50010]	0.38304	0.36454
AT5G50010	AT5G50010	sequence-specific DNA binding transcription factors;transcription regulators,[Source:TAIR;Acc:AT5G50010]	0.38304	0.36454
AT5G50120	AT5G50120	Transducin/WD40 repeat-like superfamily protein,[Source:TAIR;Acc:AT5G50120]	0.585286	0.429651
AT5G50260	AT5G50260	Cysteine proteinases superfamily protein,[Source:TAIR;Acc:AT5G50260]	5.86901	2.22791
AT5G50740	AT5G50740	Heavy metal transport/detoxification superfamily protein,[Source:TAIR;Acc:AT5G50740]	0.503817	0.42798
AT5G50820	anac097	NAC domain containing protein 97,[Source:TAIR;Acc:AT5G50820]	0.489084	0.289336
AT5G50930	AT5G50930	Histone superfamily protein,[Source:TAIR;Acc:AT5G50930]	4.07804	2.43978
AT5G51580	AT5G51580	unknown protein,[Source:TAIR;Acc:AT5G51580]	2.27474	2.0218
AT5G51780	AT5G51780	basic helix-loop-helix (bHLH) DNA-binding superfamily protein,[Source:TAIR;Acc:AT5G51780]	0.44934	0.355272
AT5G51890	AT5G51890	Peroxidase superfamily protein,[Source:TAIR;Acc:AT5G51890]	0.616845	0.466324
AT5G51920	AT5G51920	Pyridoxal phosphate (PLP)-dependent transferases superfamily protein,[Source:TAIR;Acc:AT5G51920]	2.6008	1.95727
AT5G52930	AT5G52930	Protein of unknown function (DUF295),[Source:TAIR;Acc:AT5G52930]	2.05942	27.6781
AT5G52940	AT5G52940	Protein of unknown function (DUF295),[Source:TAIR;Acc:AT5G52940]	3.24358	23.1552
AT5G53230	AT5G53230	Protein of unknown function (DUF295),[Source:TAIR;Acc:AT5G53230]	7.84175	9.86625
AT5G53240	AT5G53240	Protein of unknown function (DUF295),[Source:TAIR;Acc:AT5G53240]	7.72462	36.268
AT5G53250	AGP22	arabinogalactan protein 22,[Source:TAIR;Acc:AT5G53250]	0.308894	0.130192
AT5G53486	AT5G53486	unknown protein,[Source:TAIR;Acc:AT5G53486]	0.582952	0.143211
AT5G53740	AT5G53740	unknown protein,[Source:TAIR;Acc:AT5G53740]	2.00801	4.47036
AT5G53830	AT5G53830	VQ motif-containing protein,[Source:TAIR;Acc:AT5G53830]	2.72106	1.69986
AT5G53902	U3B	U3BsnoRNA,[Source:TAIR;Acc:AT5G53902]	1.79168	3.21299
AT5G53902	U3B	U3BsnoRNA,[Source:TAIR;Acc:AT5G53902]	1.67959	3.24973
AT5G54070	AT-HSFA9	heat shock transcription factor A9,[Source:TAIR;Acc:AT5G54070]	1.93772	3.38833
AT5G54070	AT-HSFA9	heat shock transcription factor A9,[Source:TAIR;Acc:AT5G54070]	1.93772	3.38833
AT5G54370	AT5G54370	Late embryogenesis abundant (LEA) protein-related,[Source:TAIR;Acc:AT5G54370]	0.57453	0.355067
AT5G54680	ILR3	basic helix-loop-helix (bHLH) DNA-binding superfamily protein,[Source:TAIR;Acc:AT5G54680]	0.585303	0.498123
AT5G55490	ATGEX1	gamete expressed protein 1,[Source:TAIR;Acc:AT5G55490]	3.02404	2.33387
AT5G56370	AT5G56370	F-box/RNI-like/FBD-like domains-containing protein,[Source:TAIR;Acc:AT5G56370]	2.15136	5.15569
AT5G56530	AT5G56530	Protein of Unknown Function (DUF239),[Source:TAIR;Acc:AT5G56530]	0.563128	0.494062
AT5G56540	AGP14	arabinogalactan protein 14,[Source:TAIR;Acc:AT5G56540]	0.418103	0.133711
AT5G56810	AT5G56810	F-box/RNI-like/FBD-like domains-containing protein,[Source:TAIR;Acc:AT5G56810]	1.80188	13.9395
AT5G57090	EIR1	Auxin efflux carrier family protein,[Source:TAIR;Acc:AT5G57090]	0.6089	0.416851
AT5G57240	ORP4C	OSBP(oxysterol binding protein)-related protein 4C,[Source:TAIR;Acc:AT5G57240]	2.26739	3.89563
AT5G57340	AT5G57340	unknown protein,[Source:TAIR;Acc:AT5G57340]	3.36212	2.81305
AT5G57540	XTH13	xyloglucan endotransglucosylase/hydrolase 13,[Source:TAIR;Acc:AT5G57540]	0.190809	0.585154
AT5G58010	LRL3	LJRHL1-like 3,[Source:TAIR;Acc:AT5G58010]	0.393535	0.508014
AT5G59070	AT5G59070	UDP-Glycosyltransferase superfamily protein,[Source:TAIR;Acc:AT5G59070]	2.03863	2.46627
AT5G59090	ATSBT4,12	subtilase 4,12,[Source:TAIR;Acc:AT5G59090]	0.358874	0.342283
AT5G59390	AT5G59390	XH/XS domain-containing protein,[Source:TAIR;Acc:AT5G59390]	3.11119	13.5578
AT5G59680	AT5G59680	Leucine-rich repeat protein kinase family protein,[Source:TAIR;Acc:AT5G59680]	0.521261	0.205912
AT5G59845	AT5G59845	Gibberellin-regulated family protein,[Source:TAIR;Acc:AT5G59845]	0.483535	0.565803
AT5G60022	AT5G60022	other RNA,[Source:TAIR;Acc:AT5G60022]	0.607308	0.403002
AT5G60022	AT5G60022	other RNA,[Source:TAIR;Acc:AT5G60022]	0.610284	0.408183
AT5G60490	FLA12	FASCICLIN-like arabinogalactan-protein 12,[Source:TAIR;Acc:AT5G60490]	0.612586	0.363074
AT5G60510	AT5G60510	Undecaprenyl pyrophosphate synthetase family protein,[Source:TAIR;Acc:AT5G60510]	0.42521	0.503886
AT5G60530	AT5G60530	late embryogenesis abundant protein-related	0.611432	0.343272
AT5G60610	AT5G60610	F-box/RNI-like superfamily protein,[Source:TAIR;Acc:AT5G60610]	2.64776	4.77361
AT5G60660	PIP2F	plasma membrane intrinsic protein 2;4,[Source:TAIR;Acc:AT5G60660]	0.391713	0.164094
AT5G60720	AT5G60720	Protein of unknown function, DUF547,[Source:TAIR;Acc:AT5G60720]	0.545132	0.405422
AT5G61070	HDA18	histone deacetylase of the RPD3/HDA1 superfamily 18,[Source:TAIR;Acc:AT5G61070]	2.99092	2.62549
AT5G61740	ATATH14	ABC2 homolog 14,[Source:TAIR;Acc:AT5G61740]	64.0019	16.7023
AT5G62340	AT5G62340	Plant invertase/pectin methylesterase inhibitor superfamily protein,[Source:TAIR;Acc:AT5G62340]	0.119036	0.190948
AT5G62960	AT5G62960	unknown protein,[Source:TAIR;Acc:AT5G62960]	2.04299	2.81119
AT5G63090	LOB	Lateral organ boundaries (LOB) domain family protein,[Source:TAIR;Acc:AT5G63090]	4.38977	7.77937
AT5G63750	ATARI13	RING/U-box superfamily protein,[Source:TAIR;Acc:AT5G63750]	8.03363	10.4982
AT5G63850	AAP4	amino acid permease 4,[Source:TAIR;Acc:AT5G63850]	0.598841	0.327045
AT5G64060	anac103	NAC domain containing protein 103,[Source:TAIR;Acc:AT5G64060]	2.36979	4.35357
AT5G64750	ABR1	Integrase-type DNA-binding superfamily protein,[Source:TAIR;Acc:AT5G64750]	1.92475	2.25662
AT5G64870	AT5G64870	SPFH/Band 7/PHB domain-containing membrane-associated protein family,[Source:TAIR;Acc:AT5G64870]	2.85156	3.28868
AT5G64910	AT5G64910	unknown protein,[Source:TAIR;Acc:AT5G64910]	2.67994	6.04718
AT5G65140	AT5G65140	Haloacid dehalogenase-like hydrolase (HAD) superfamily protein,[Source:TAIR;Acc:AT5G65140]	0.374633	0.251247
AT5G65170	AT5G65170	VQ motif-containing protein,[Source:TAIR;Acc:AT5G65170]	2.07294	2.03966
AT5G65510	AIL7	AINTEGUMENTA-like 7,[Source:TAIR;Acc:AT5G65510]	3.20506	3.10254
AT5G65530	AT5G65530	Protein kinase superfamily protein,[Source:TAIR;Acc:AT5G65530]	0.46787	0.551615
AT5G65690	PCK2	phosphoenolpyruvate carboxykinase 2,[Source:TAIR;Acc:AT5G65690]	0.539185	0.20348
AT5G66070	AT5G66070	RING/U-box superfamily protein,[Source:TAIR;Acc:AT5G66070]	2.09523	1.57067
AT5G66130	ATRAD17	RADIATION SENSITIVE 17,[Source:TAIR;Acc:AT5G66130]	2.14835	3.38708
AT5G66280	GMD1	GDP-D-mannose 4,6-dehydratase 1,[Source:TAIR;Acc:AT5G66280]	0.542547	0.456275
AT5G66390	AT5G66390	Peroxidase superfamily protein,[Source:TAIR;Acc:AT5G66390]	0.422272	0.424722
AT5G66400	RAB18	Dehydrin family protein,[Source:TAIR;Acc:AT5G66400]	0.288145	0.53507
AT5G66650	AT5G66650	Protein of unknown function (DUF607),[Source:TAIR;Acc:AT5G66650]	1.57331	2.10042
AT5G66800	AT5G66800	unknown protein,[Source:TAIR;Acc:AT5G66800]	0.200381	0.424335
AT5G66985	AT5G66985	unknown protein,[Source:TAIR;Acc:AT5G66985]	0.624126	0.378288
AT5G67430	AT5G67430	Acyl-CoA N-acyltransferases (NAT) superfamily protein,[Source:TAIR;Acc:AT5G67430]	0.512119	0.238677
AT5G67620	AT5G67620	unknown protein,[Source:TAIR;Acc:AT5G67620]	0.534695	0.409184
ATCG00640	RPL33	ribosomal protein L33,[Source:TAIR;Acc:ATCG00640]	0.241447	0.591521
ATCG00960	RRN4,5S,1	Chloroplast-encoded 4,5S ribosomal RNA, which is a constituent of the 50S large subunit of plastidic ribosome,,[Source:TAIR;Acc:ATCG00960]	3.12159	2.24822
ATMG01360	COX1	cytochrome oxidase,[Source:TAIR;Acc:ATMG01360]	1.54454	2.26751
C0LGP2	AT3G46330	Probable LRR receptor-like serine/threonine-protein kinase MEE39 Precursor (EC 2,7,11,1)(Protein MATERNAL EFFECT EMBRYO ARREST 39) [Source:UniProtKB/Swiss-Prot;Acc:C0LGP2]	0.641634	0.492283
NP_001119353	AT5G41761	unknown protein [Source:RefSeq peptide;Acc:NP_001119353]	2.87287	16.23
NP_001119400	AT5G49110	unknown protein [Source:RefSeq peptide;Acc:NP_001119400]	2.38751	2.80802
NP_171905	AT1G04090	unknown protein [Source:RefSeq peptide;Acc:NP_171905]	3.39772	1.96919
NP_174326	AT1G30370	lipase class 3 family protein [Source:RefSeq peptide;Acc:NP_174326]	0.543277	0.0382124
NP_178020	AT1G78990	transferase family protein [Source:RefSeq peptide;Acc:NP_178020]	0.487747	0.213419
NP_180789	AT2G32300	UCC1 (UCLACYANIN 1); copper ion binding / electron carrier [Source:RefSeq peptide;Acc:NP_180789]	0.621586	0.437861
NP_181741	AT2G42110	unknown protein [Source:RefSeq peptide;Acc:NP_181741]	0.627747	0.443295
NP_187437	AT3G07800	thymidine kinase, putative [Source:RefSeq peptide;Acc:NP_187437]	1.90301	2.1076
NP_191496	AT3G59370	unknown protein [Source:RefSeq peptide;Acc:NP_191496]	0.247145	0.0636494
NP_192447	AT4G05380	AAA-type ATPase family protein [Source:RefSeq peptide;Acc:NP_192447]	12.51	7.64007
NP_192992	AT4G12550	AIR1; lipid binding [Source:RefSeq peptide;Acc:NP_192992]	0.172216	0.0702014
NP_193880	AT4G21490	NDB3; NADH dehydrogenase [Source:RefSeq peptide;Acc:NP_193880]	2.00782	7.64007
NP_194012	AT4G22810	DNA-binding protein-related [Source:RefSeq peptide;Acc:NP_194012]	0.369126	0.275085
NP_194288	AT4G25580	stress-responsive protein-related [Source:RefSeq peptide;Acc:NP_194288]	2.0538	1.77309
NP_194623	AT4G28940	catalytic [Source:RefSeq peptide;Acc:NP_194623]	0.356414	0.201708
NP_195087	AT4G33610	glycine-rich protein [Source:RefSeq peptide;Acc:NP_195087]	0.151368	0.151973
NP_195453	AT4G37370	CYP81D8; electron carrier/ heme binding / iron ion binding / monooxygenase/ oxygen binding [Source:RefSeq peptide;Acc:NP_195453]	2.87598	2.7123
NP_195660	AT4G39500	CYP96A11; electron carrier/ heme binding / iron ion binding / monooxygenase/ oxygen binding [Source:RefSeq peptide;Acc:NP_195660]	3.50116	12.4074
NP_196702	AT5G11410	protein kinase family protein [Source:RefSeq peptide;Acc:NP_196702]	4.49626	7.71724
NP_196707	AT5G11460	senescence-associated protein-related [Source:RefSeq peptide;Acc:NP_196707]	2.15936	2.56465
NP_196715	AT5G11540	FAD-binding domain-containing protein [Source:RefSeq peptide;Acc:NP_196715]	0.617804	0.311327
NP_197453	AT5G19520	MSL9 (MECHANOSENSITIVE CHANNEL OF SMALL CONDUCTANCE-LIKE 9); mechanically-gated ion channel [Source:RefSeq peptide;Acc:NP_197453]	0.409709	0.545566
NP_198398	AT5G35480	unknown protein [Source:RefSeq peptide;Acc:NP_198398]	0.285157	0.370222
NP_199066	AT5G42510	disease resistance-responsive family protein [Source:RefSeq peptide;Acc:NP_199066]	0.447405	0.241874
NP_199165	AT5G43520	DC1 domain-containing protein [Source:RefSeq peptide;Acc:NP_199165]	0.63185	0.132335
NP_199606	AT5G47950	transferase family protein [Source:RefSeq peptide;Acc:NP_199606]	0.532875	0.490263
NP_199689	AT5G48780	disease resistance protein (TIR-NBS class), putative [Source:RefSeq peptide;Acc:NP_199689]	2.31671	3.58021
NP_200087	AT5G52750	heavy-metal-associated domain-containing protein [Source:RefSeq peptide;Acc:NP_200087]	1.60632	4.77418
NP_200833	AT5G60250	zinc finger (C3HC4-type RING finger) family protein [Source:RefSeq peptide;Acc:NP_200833]	4.43708	5.24005
NP_567392	AT4G12520	protease inhibitor/seed storage/lipid transfer protein (LTP) family protein [Source:RefSeq peptide;Acc:NP_567392]	0.335836	0.0851271
NP_567392	AT4G12510	protease inhibitor/seed storage/lipid transfer protein (LTP) family protein [Source:RefSeq peptide;Acc:NP_567392]	0.240554	0.0615483
NP_567449	AT4G14930	acid phosphatase survival protein SurE, putative [Source:RefSeq peptide;Acc:NP_567449]	0.523159	0.458278
NP_567576	AT4G19130	DNA binding / nucleic acid binding / zinc ion binding [Source:RefSeq peptide;Acc:NP_567576]	1.95341	2.36696
NP_568057	AT4G39320	microtubule-associated protein-related [Source:RefSeq peptide;Acc:NP_568057]	1.77288	3.40978
NP_568231	AT5G10520	RBK1 (Rop Binding protein Kinases 1); ATP binding / kinase/ protein kinase/ protein serine/threonine kinase [Source:RefSeq peptide;Acc:NP_568231]	0.568004	0.436923
NP_568933	AT5G61340	unknown protein [Source:RefSeq peptide;Acc:NP_568933]	0.610464	0.381333
NP_849366	AT4G12545	protease inhibitor/seed storage/lipid transfer protein (LTP) family protein [Source:RefSeq peptide;Acc:NP_849366]	0.388901	0.126872
NP_974233	AT3G05937	unknown protein [Source:RefSeq peptide;Acc:NP_974233]	1.57818	2.04873
NR_023038	AT4G31877	(MIR156C) otherRNA [Source:RefSeq DNA;Acc:NR_023038]	2.40195	4.96101
O23547	AT4G17030	Expansin-like B1 Precursor (AtEXLB1)(At-EXPR1)(AtEXPR1)(Ath-ExpBeta-3,1) [Source:UniProtKB/Swiss-Prot;Acc:O23547]	0.504254	0.39311
P30183	AT4G37490	Cyclin-B1-1 (G2/mitotic-specific cyclin-B1-1)(CycB1;1)(Cyc1-At) [Source:UniProtKB/Swiss-Prot;Acc:P30183]	2.61837	1.55378
P42813	AT2G02990	Ribonuclease 1 Precursor (EC 3,1,27,1) [Source:UniProtKB/Swiss-Prot;Acc:P42813]	1.93766	6.80189
Q3E8R5	AT5G33355	Defensin-like protein 207 Precursor [Source:UniProtKB/Swiss-Prot;Acc:Q3E8R5]	0.324373	0.477349
Q8LD23	AT1G20120	GDSL esterase/lipase At1g20120 Precursor (EC 3,1,1,-)(Extracellular lipase At1g20120) [Source:UniProtKB/Swiss-Prot;Acc:Q8LD23]	6.88499	5.34653
Q8LPF3	AT5G47500	Probable pectinesterase 68 Precursor (PE 68)(EC 3,1,1,11)(Pectin methylesterase 68)(AtPME68) [Source:UniProtKB/Swiss-Prot;Acc:Q8LPF3]	0.563078	0.240861
Q8LPH6	AT5G26660	Transcription factor MYB86 (Myb-related protein 86)(AtMYB86)(Myb homolog 4)(AtMyb4) [Source:UniProtKB/Swiss-Prot;Acc:Q8LPH6]	0.607126	0.365641
Q8VZW1	AT4G19030	Aquaporin NIP1-1 (NOD26-like intrinsic protein 1-1)(AtNIP1;1)(Nodulin-26-like major intrinsic protein 1)(NodLikeMip1)(Protein NLM1) [Source:UniProtKB/Swiss-Prot;Acc:Q8VZW1]	0.45993	0.531409
Q96324	AT3G03190	Glutathione S-transferase (EC 2,5,1,18)(GST class-phi) [Source:UniProtKB/Swiss-Prot;Acc:Q96324]	0.514854	0.0795622
Q9CA68	AT1G74460	GDSL esterase/lipase At1g74460 Precursor (EC 3,1,1,-)(Extracellular lipase At1g74460) [Source:UniProtKB/Swiss-Prot;Acc:Q9CA68]	0.306783	0.230086
Q9FGL2	AT5G47450	Aquaporin TIP2-3 (Tonoplast intrinsic protein 2-3)(AtTIP2;3) [Source:UniProtKB/Swiss-Prot;Acc:Q9FGL2]	0.226208	0.0888118
Q9FIF5	AT5G59220	Probable protein phosphatase 2C 78 (AtPP2C78)(EC 3,1,3,16) [Source:UniProtKB/Swiss-Prot;Acc:Q9FIF5]	0.645583	0.321939
Q9FKC8	AT5G37990	Probable S-adenosylmethionine-dependent methyltransferase At5g37990 (EC 2,1,1,-) [Source:UniProtKB/Swiss-Prot;Acc:Q9FKC8]	0.0597913	0.0454636
Q9FMA0	AT5G56320	Expansin-A14 Precursor 14)(Alpha-expansin-14)(At-EXP14)(AtEx14)(Ath-ExpAlpha-1,5) [Source:UniProtKB/Swiss-Prot;Acc:Q9FMA0]	0.581658	0.451325
Q9LDA4	AT4G08780	Peroxidase 38 Precursor (Atperox P38)(EC 1,11,1,7) [Source:UniProtKB/Swiss-Prot;Acc:Q9LDA4]	0.46334	0.260386
Q9LND9	AT1G06090	Delta-9 desaturase-like 1 protein (EC 1,14,19,-) [Source:UniProtKB/Swiss-Prot;Acc:Q9LND9]	0.556036	0.331727
Q9LZX4	AT3G60900	Fasciclin-like arabinogalactan protein 10 Precursor [Source:UniProtKB/Swiss-Prot;Acc:Q9LZX4]	0.506809	0.144328
Q9SKD9	AT2G46400	Probable WRKY transcription factor 46 (WRKY DNA-binding protein 46) [Source:UniProtKB/Swiss-Prot;Acc:Q9SKD9]	3.28581	20.9973
Q9STQ3	AT4G26320	Arabinogalactan peptide 13 Precursor (AG-peptide 13) [Source:UniProtKB/Swiss-Prot;Acc:Q9STQ3]	0.275523	0.0842417
Q9SUP0	AT4G20390	UPF0497 membrane protein At4g20390 [Source:UniProtKB/Swiss-Prot;Acc:Q9SUP0]	0.601891	0.345848
Q9SUU1	AT4G32510	Putative boron transporter 7 [Source:UniProtKB/Swiss-Prot;Acc:Q9SUU1]	2.3166	2.07407
Q9SVQ0	AT4G13620	Ethylene-responsive transcription factor ERF062 [Source:UniProtKB/Swiss-Prot;Acc:Q9SVQ0]	0.661943	0.206438
Q9ZT17	AT4G40090	Classical arabinogalactan protein 3 Precursor [Source:UniProtKB/Swiss-Prot;Acc:Q9ZT17]	0.582172	0.490883
Q9ZVF3	AT2G01520	MLP-like protein 328 [Source:UniProtKB/Swiss-Prot;Acc:Q9ZVF3]	0.167828	0.12881

## Sheet: absence of tase + genome damag 
locus	Feature	Description	G7/wt set1	G7/wt set2
AT1G01010	ANAC001	NAC domain containing protein 1,[Source:TAIR;Acc:AT1G01010]	0.34875	0.256523
AT1G01225	AT1G01225	NC domain-containing protein-related,[Source:TAIR;Acc:AT1G01225]	0.338396	0.478859
AT1G01390	AT1G01390	UDP-Glycosyltransferase superfamily protein,[Source:TAIR;Acc:AT1G01390]	0.563765	0.252322
AT1G02300	AT1G02300	Cysteine proteinases superfamily protein,[Source:TAIR;Acc:AT1G02300]	2.12691	1.68281
AT1G02650	AT1G02650	Tetratricopeptide repeat (TPR)-like superfamily protein,[Source:TAIR;Acc:AT1G02650]	4.19805	2.3563
AT1G02800	ATCEL2	cellulase 2,[Source:TAIR;Acc:AT1G02800]	0.27744	0.256466
AT1G02900	RALFL1	rapid alkalinization factor 1,[Source:TAIR;Acc:AT1G02900]	0.659221	0.431807
AT1G03106	AT1G03106	unknown protein,[Source:TAIR;Acc:AT1G03106]	0.354504	0.307841
AT1G04560	AT1G04560	AWPM-19-like family protein,[Source:TAIR;Acc:AT1G04560]	0.0830888	0
AT1G05260	RCI3	Peroxidase superfamily protein,[Source:TAIR;Acc:AT1G05260]	0.57137	0.370348
AT1G05650	AT1G05650	Pectin lyase-like superfamily protein,[Source:TAIR;Acc:AT1G05650]	0.580068	0.10263
AT1G05660	AT1G05660	Pectin lyase-like superfamily protein,[Source:TAIR;Acc:AT1G05660]	0.512031	0.222333
AT1G06360	AT1G06360	Fatty acid desaturase family protein,[Source:TAIR;Acc:AT1G06360]	0.204764	0.477135
AT1G06520	ATGPAT1	glycerol-3-phosphate acyltransferase 1,[Source:TAIR;Acc:AT1G06520]	4.3954	2.437
AT1G06830	AT1G06830	Glutaredoxin family protein,[Source:TAIR;Acc:AT1G06830]	0.305911	0.314832
AT1G07400	AT1G07400	HSP20-like chaperones superfamily protein,[Source:TAIR;Acc:AT1G07400]	2.25256	2.0142
AT1G07740	AT1G07740	Tetratricopeptide repeat (TPR)-like superfamily protein,[Source:TAIR;Acc:AT1G07740]	0.526674	0.499542
AT1G08260	EMB142	DNA polymerase epsilon catalytic subunit,[Source:TAIR;Acc:AT1G08260]	2.02876	1.68695
AT1G08340	AT1G08340	Rho GTPase activating protein with PAK-box/P21-Rho-binding domain,[Source:TAIR;Acc:AT1G08340]	0.52315	0.374919
AT1G08430	ALMT1	aluminum-activated malate transporter 1,[Source:TAIR;Acc:AT1G08430]	2.16364	3.07831
AT1G08500	ENODL18	early nodulin-like protein 18,[Source:TAIR;Acc:AT1G08500]	0.469202	0.382294
AT1G08990	PGSIP5	plant glycogenin-like starch initiation protein 5,[Source:TAIR;Acc:AT1G08990]	0.630205	0.497734
AT1G09080	BIP3	Heat shock protein 70 (Hsp 70) family protein,[Source:TAIR;Acc:AT1G09080]	3.79311	2.99275
AT1G09540	MYB61	myb domain protein 61,[Source:TAIR;Acc:AT1G09540]	0.510482	0.351804
AT1G09850	XBCP3	xylem bark cysteine peptidase 3,[Source:TAIR;Acc:AT1G09850]	1.7996	3.66464
AT1G10300	AT1G10300	Nucleolar GTP-binding protein,[Source:TAIR;Acc:AT1G10300]	1.87375	4.2511
AT1G11600	CYP77B1	cytochrome P450, family 77, subfamily B, polypeptide 1,[Source:TAIR;Acc:AT1G11600]	0.471939	0.42125
AT1G11740	AT1G11740	ankyrin repeat family protein,[Source:TAIR;Acc:AT1G11740]	0.204519	0.205198
AT1G12080	AT1G12080	Vacuolar calcium-binding protein-related,[Source:TAIR;Acc:AT1G12080]	0.397471	0.45394
AT1G12200	AT1G12200	Flavin-binding monooxygenase family protein,[Source:TAIR;Acc:AT1G12200]	1.73973	2.21698
AT1G13330	AHP2	Arabidopsis Hop2 homolog,[Source:TAIR;Acc:AT1G13330]	2.35352	1.90293
AT1G13420	ATST4B	sulfotransferase 4B,[Source:TAIR;Acc:AT1G13420]	0.472663	0.304018
AT1G13430	ATST4C	sulfotransferase 4C,[Source:TAIR;Acc:AT1G13430]	0.531775	0.146593
AT1G14190	AT1G14190	Glucose-methanol-choline (GMC) oxidoreductase family protein,[Source:TAIR;Acc:AT1G14190]	0.522057	0.250283
AT1G14430	AT1G14430	glyoxal oxidase-related protein,[Source:TAIR;Acc:AT1G14430]	0.439667	0.610768
AT1G14540	AT1G14540	Peroxidase superfamily protein,[Source:TAIR;Acc:AT1G14540]	0.58597	0.450481
AT1G14730	AT1G14730	Cytochrome b561/ferric reductase transmembrane protein family,[Source:TAIR;Acc:AT1G14730]	0.613533	0.342032
AT1G14780	AT1G14780	MAC/Perforin domain-containing protein,[Source:TAIR;Acc:AT1G14780]	3.25114	2.58757
AT1G15330	AT1G15330	Cystathionine beta-synthase (CBS) protein,[Source:TAIR;Acc:AT1G15330]	0.218961	0
AT1G15405	AT1G15405	other RNA,[Source:TAIR;Acc:AT1G15405]	1.57066	3.95778
AT1G16390	ATOCT3	organic cation/carnitine transporter 3,[Source:TAIR;Acc:AT1G16390]	0.468455	0.545455
AT1G16410	CYP79F1	cytochrome p450 79f1,[Source:TAIR;Acc:AT1G16410]	0.625323	0.289557
AT1G16510	AT1G16510	SAUR-like auxin-responsive protein family,[Source:TAIR;Acc:AT1G16510]	2.57881	2.53503
AT1G17460	TRFL3	TRF-like 3,[Source:TAIR;Acc:AT1G17460]	2.06782	2.38195
AT1G17700	PRA1,F1	prenylated RAB acceptor 1,F1,[Source:TAIR;Acc:AT1G17700]	0.465264	0.24874
AT1G17830	AT1G17830	Protein of unknown function (DUF789),[Source:TAIR;Acc:AT1G17830]	2.18536	1.71016
AT1G18140	LAC1	laccase 1,[Source:TAIR;Acc:AT1G18140]	0.391817	0.513052
AT1G18265	AT1G18265	Protein of unknown function, DUF593,[Source:TAIR;Acc:AT1G18265]	2.00874	1.53916
AT1G19380	AT1G19380	Protein of unknown function (DUF1195),[Source:TAIR;Acc:AT1G19380]	2.0775	1.6595
AT1G19530	AT1G19530	unknown protein,[Source:TAIR;Acc:AT1G19530]	0.351761	0.624938
AT1G19610	LCR78	Arabidopsis defensin-like protein,[Source:TAIR;Acc:AT1G19610]	2.12011	3.82462
AT1G19900	AT1G19900	glyoxal oxidase-related protein,[Source:TAIR;Acc:AT1G19900]	0.320327	0.169287
AT1G20030	AT1G20030	Pathogenesis-related thaumatin superfamily protein,[Source:TAIR;Acc:AT1G20030]	0.445494	0.466426
AT1G20350	ATTIM17-1	translocase inner membrane subunit 17-1,[Source:TAIR;Acc:AT1G20350]	2.33275	3.16105
AT1G20440	COR47	cold-regulated 47,[Source:TAIR;Acc:AT1G20440]	0.601485	0.429182
AT1G20620	CAT3	catalase 3,[Source:TAIR;Acc:AT1G20620]	2.1373	1.75758
AT1G20823	AT1G20823	RING/U-box superfamily protein,[Source:TAIR;Acc:AT1G20823]	0.595551	0.42753
AT1G20850	XCP2	xylem cysteine peptidase 2,[Source:TAIR;Acc:AT1G20850]	0.643367	0.463132
AT1G21100	AT1G21100	O-methyltransferase family protein,[Source:TAIR;Acc:AT1G21100]	0.526094	0.416935
AT1G22030	AT1G22030	No description	0.342667	0.582388
AT1G22980	AT1G22980	unknown protein,[Source:TAIR;Acc:AT1G22980]	3.28708	5.5406
AT1G23340	AT1G23340	Protein of Unknown Function (DUF239),[Source:TAIR;Acc:AT1G23340]	0.279874	0.418807
AT1G24095	AT1G24095	Putative thiol-disulphide oxidoreductase DCC,[Source:TAIR;Acc:AT1G24095]	1.67115	2.13431
AT1G24130	AT1G24130	Transducin/WD40 repeat-like superfamily protein,[Source:TAIR;Acc:AT1G24130]	0.425389	0.0570416
AT1G25510	AT1G25510	Eukaryotic aspartyl protease family protein,[Source:TAIR;Acc:AT1G25510]	0.496277	0.384793
AT1G25560	TEM1	AP2/B3 transcription factor family protein,[Source:TAIR;Acc:AT1G25560]	3.71796	1.86108
AT1G27660	AT1G27660	basic helix-loop-helix (bHLH) DNA-binding superfamily protein,[Source:TAIR;Acc:AT1G27660]	0.633007	0.384801
AT1G27710	AT1G27710	Glycine-rich protein family,[Source:TAIR;Acc:AT1G27710]	2.96241	1.86553
AT1G27760	SAT32	interferon-related developmental regulator family protein / IFRD protein family,[Source:TAIR;Acc:AT1G27760]	3.9192	3.86498
AT1G27940	PGP13	P-glycoprotein 13,[Source:TAIR;Acc:AT1G27940]	2.04756	2.97544
AT1G28710	AT1G28710	Nucleotide-diphospho-sugar transferase family protein,[Source:TAIR;Acc:AT1G28710]	0.38265	0.575071
AT1G29590	eIF4E3	Eukaryotic initiation factor 4E protein,[Source:TAIR;Acc:AT1G29590]	1.71779	2.99275
AT1G30080	AT1G30080	Glycosyl hydrolase superfamily protein,[Source:TAIR;Acc:AT1G30080]	0.477449	0.559677
AT1G30160	AT1G30160	Protein of unknown function (DUF295),[Source:TAIR;Acc:AT1G30160]	5.49478	2.18043
AT1G30170	AT1G30170	Protein of unknown function (DUF295),[Source:TAIR;Acc:AT1G30170]	4.9082	2.37625
AT1G30473	AT1G30473	Heavy metal transport/detoxification superfamily protein,[Source:TAIR;Acc:AT1G30473]	1.97	2.14551
AT1G30473	AT1G30473	Heavy metal transport/detoxification superfamily protein,[Source:TAIR;Acc:AT1G30473]	2.21551	2.47464
AT1G30750	AT1G30750	unknown protein,[Source:TAIR;Acc:AT1G30750]	0.443104	0.449792
AT1G30840	PUP4	purine permease 4,[Source:TAIR;Acc:AT1G30840]	0.448743	0.192398
AT1G31050	AT1G31050	basic helix-loop-helix (bHLH) DNA-binding superfamily protein,[Source:TAIR;Acc:AT1G31050]	0.616133	0.475872
AT1G31280	AGO2	Argonaute family protein,[Source:TAIR;Acc:AT1G31280]	2.00793	1.6323
AT1G31310	AT1G31310	hydroxyproline-rich glycoprotein family protein,[Source:TAIR;Acc:AT1G31310]	0.582937	0.468452
AT1G31710	AT1G31710	Copper amine oxidase family protein,[Source:TAIR;Acc:AT1G31710]	0.633468	0.395146
AT1G32450	NRT1,5	nitrate transporter 1,5,[Source:TAIR;Acc:AT1G32450]	0.501054	0.139012
AT1G32583	AT1G32583	No description	3.10173	5.37805
AT1G33170	AT1G33170	S-adenosyl-L-methionine-dependent methyltransferases superfamily protein,[Source:TAIR;Acc:AT1G33170]	0.538134	0.144353
AT1G33340	AT1G33340	ENTH/ANTH/VHS superfamily protein,[Source:TAIR;Acc:AT1G33340]	0.580041	0.403112
AT1G33790	AT1G33790	jacalin lectin family protein,[Source:TAIR;Acc:AT1G33790]	2.75779	1.72374
AT1G34180	anac016	NAC domain containing protein 16,[Source:TAIR;Acc:AT1G34180]	3.01325	2.07991
AT1G36060	AT1G36060	Integrase-type DNA-binding superfamily protein,[Source:TAIR;Acc:AT1G36060]	2.11458	3.45523
AT1G36180	ACC2	acetyl-CoA carboxylase 2,[Source:TAIR;Acc:AT1G36180]	4.47661	2.48315
AT1G43160	RAP2,6	related to AP2 6,[Source:TAIR;Acc:AT1G43160]	0.56539	0.402396
AT1G49450	AT1G49450	Transducin/WD40 repeat-like superfamily protein,[Source:TAIR;Acc:AT1G49450]	0.271088	0.0864034
AT1G49700	AT1G49700	Plant protein 1589 of unknown function,[Source:TAIR;Acc:AT1G49700]	2.19784	2.09467
AT1G49920	AT1G49920	MuDR family transposase,[Source:TAIR;Acc:AT1G49920]	1.65423	3.37155
AT1G52000	AT1G52000	Mannose-binding lectin superfamily protein,[Source:TAIR;Acc:AT1G52000]	3.28583	1.75226
AT1G52690	AT1G52690	Late embryogenesis abundant protein (LEA) family protein,[Source:TAIR;Acc:AT1G52690]	0.589391	0.0972115
AT1G52740	HTA9	histone H2A protein 9,[Source:TAIR;Acc:AT1G52740]	0.635753	0.357375
AT1G53480	MRD1	mto 1 responding down 1,[Source:TAIR;Acc:AT1G53480]	0.0206643	0.0984742
AT1G53480	MRD1	mto 1 responding down 1,[Source:TAIR;Acc:AT1G53480]	0.0360263	0.142513
AT1G53540	AT1G53540	HSP20-like chaperones superfamily protein,[Source:TAIR;Acc:AT1G53540]	2.86309	6.42413
AT1G53680	ATGSTU28	glutathione S-transferase TAU 28,[Source:TAIR;Acc:AT1G53680]	0.558759	0.423851
AT1G54540	AT1G54540	Late embryogenesis abundant (LEA) hydroxyproline-rich glycoprotein family,[Source:TAIR;Acc:AT1G54540]	0.531724	0.30226
AT1G54870	AT1G54870	NAD(P)-binding Rossmann-fold superfamily protein,[Source:TAIR;Acc:AT1G54870]	0.0759632	0.192387
AT1G55990	AT1G55990	glycine-rich protein,[Source:TAIR;Acc:AT1G55990]	0.277952	0.137222
AT1G56150	AT1G56150	SAUR-like auxin-responsive protein family,[Source:TAIR;Acc:AT1G56150]	3.5095	1.66133
AT1G56600	AtGolS2	galactinol synthase 2,[Source:TAIR;Acc:AT1G56600]	0.476768	0.301801
AT1G58070	AT1G58070	unknown protein,[Source:TAIR;Acc:AT1G58070]	0.488026	0.497179
AT1G60030	ATNAT7	nucleobase-ascorbate transporter 7,[Source:TAIR;Acc:AT1G60030]	3.19024	2.37625
AT1G60060	AT1G60060	Serine/threonine-protein kinase WNK (With No Lysine)-related,[Source:TAIR;Acc:AT1G60060]	2.77543	1.62124
AT1G60360	AT1G60360	RING/U-box superfamily protein,[Source:TAIR;Acc:AT1G60360]	1.59524	2.14537
AT1G61255	AT1G61255	No description	2.21807	1.90553
AT1G61800	GPT2	glucose-6-phosphate/phosphate translocator 2,[Source:TAIR;Acc:AT1G61800]	3.23946	3.54732
AT1G62290	AT1G62290	Saposin-like aspartyl protease family protein,[Source:TAIR;Acc:AT1G62290]	2.00947	1.51303
AT1G62320	AT1G62320	ERD (early-responsive to dehydration stress) family protein,[Source:TAIR;Acc:AT1G62320]	0.607706	0.286357
AT1G62360	STM	KNOX/ELK homeobox transcription factor,[Source:TAIR;Acc:AT1G62360]	2.91383	1.60168
AT1G62500	AT1G62500	Bifunctional inhibitor/lipid-transfer protein/seed storage 2S albumin superfamily protein,[Source:TAIR;Acc:AT1G62500]	0.340839	0.112757
AT1G62560	FMO GS-OX3	flavin-monooxygenase glucosinolate S-oxygenase 3,[Source:TAIR;Acc:AT1G62560]	0.599904	0.375893
AT1G62570	FMO GS-OX4	flavin-monooxygenase glucosinolate S-oxygenase 4,[Source:TAIR;Acc:AT1G62570]	0.56514	0.456809
AT1G63750	AT1G63750	Disease resistance protein (TIR-NBS-LRR class) family,[Source:TAIR;Acc:AT1G63750]	2.81725	1.89466
AT1G63930	ROH1	from the Czech 'roh' meaning 'corner',[Source:TAIR;Acc:AT1G63930]	0.593075	0.478859
AT1G64590	AT1G64590	NAD(P)-binding Rossmann-fold superfamily protein,[Source:TAIR;Acc:AT1G64590]	0.209215	0.0701032
AT1G65370	AT1G65370	TRAF-like family protein,[Source:TAIR;Acc:AT1G65370]	2.67453	2.12298
AT1G65500	AT1G65500	unknown protein,[Source:TAIR;Acc:AT1G65500]	3.05742	3.07856
AT1G65710	AT1G65710	unknown protein,[Source:TAIR;Acc:AT1G65710]	0.556267	0.416883
AT1G65860	FMO GS-OX1	flavin-monooxygenase glucosinolate S-oxygenase 1,[Source:TAIR;Acc:AT1G65860]	0.562639	0.35519
AT1G66040	VIM4	Zinc finger (C3HC4-type RING finger) family protein,[Source:TAIR;Acc:AT1G66040]	2.32955	1.55967
AT1G66100	AT1G66100	Plant thionin,[Source:TAIR;Acc:AT1G66100]	0.441427	0.0911604
AT1G66280	BGLU22	Glycosyl hydrolase superfamily protein,[Source:TAIR;Acc:AT1G66280]	0.598195	0.358396
AT1G66920	AT1G66920	Protein kinase superfamily protein,[Source:TAIR;Acc:AT1G66920]	2.05464	2.33955
AT1G67030	ZFP6	zinc finger protein 6,[Source:TAIR;Acc:AT1G67030]	0.497092	0.464815
AT1G67865	AT1G67865	unknown protein,[Source:TAIR;Acc:AT1G67865]	0.493745	0.367367
AT1G68250	AT1G68250	unknown protein,[Source:TAIR;Acc:AT1G68250]	0	0.107979
AT1G68810	AT1G68810	basic helix-loop-helix (bHLH) DNA-binding superfamily protein,[Source:TAIR;Acc:AT1G68810]	0.589213	0.395941
AT1G69080	AT1G69080	Adenine nucleotide alpha hydrolases-like superfamily protein,[Source:TAIR;Acc:AT1G69080]	0.303862	0.267675
AT1G69230	SP1L2	SPIRAL1-like2,[Source:TAIR;Acc:AT1G69230]	0.386698	0.459995
AT1G69600	ZFHD1	zinc finger homeodomain 1,[Source:TAIR;Acc:AT1G69600]	0.495601	0.448377
AT1G69880	ATH8	thioredoxin H-type 8,[Source:TAIR;Acc:AT1G69880]	2.3228	3.473
AT1G70170	MMP	matrix metalloproteinase,[Source:TAIR;Acc:AT1G70170]	0.29542	0.202121
AT1G70260	AT1G70260	nodulin MtN21 /EamA-like transporter family protein,[Source:TAIR;Acc:AT1G70260]	14.8854	1.79568
AT1G70430	AT1G70430	Protein kinase superfamily protein,[Source:TAIR;Acc:AT1G70430]	5.42389	1.80139
AT1G70850	MLP34	MLP-like protein 34,[Source:TAIR;Acc:AT1G70850]	0.388978	0.395305
AT1G70890	MLP43	MLP-like protein 43,[Source:TAIR;Acc:AT1G70890]	2.3068	1.55395
AT1G70990	AT1G70990	proline-rich family protein,[Source:TAIR;Acc:AT1G70990]	0.510482	0.451466
AT1G71030	ATMYBL2	MYB-like 2,[Source:TAIR;Acc:AT1G71030]	2.79419	2.40557
AT1G71050	AT1G71050	Heavy metal transport/detoxification superfamily protein,[Source:TAIR;Acc:AT1G71050]	1.51335	2.05221
AT1G71380	ATGH9B3	cellulase 3,[Source:TAIR;Acc:AT1G71380]	2.79146	2.23871
AT1G71740	AT1G71740	unknown protein,[Source:TAIR;Acc:AT1G71740]	0.306791	0.367858
AT1G71760	AT1G71760	unknown protein,[Source:TAIR;Acc:AT1G71760]	3.19049	1.68995
AT1G72230	AT1G72230	Cupredoxin superfamily protein,[Source:TAIR;Acc:AT1G72230]	0.605581	0.415746
AT1G72520	AT1G72520	PLAT/LH2 domain-containing lipoxygenase family protein,[Source:TAIR;Acc:AT1G72520]	4.32967	1.60168
AT1G73330	ATDR4	drought-repressed 4,[Source:TAIR;Acc:AT1G73330]	0.204432	0.0936614
AT1G74430	MYB95	myb domain protein 95,[Source:TAIR;Acc:AT1G74430]	2.12689	1.5016
AT1G74940	AT1G74940	Protein of unknown function (DUF581),[Source:TAIR;Acc:AT1G74940]	2.63064	1.96597
AT1G75030	ATLP-3	thaumatin-like protein 3,[Source:TAIR;Acc:AT1G75030]	0.398826	0.319225
AT1G75550	AT1G75550	glycine-rich protein,[Source:TAIR;Acc:AT1G75550]	0.48481	0.448943
AT1G76250	AT1G76250	unknown protein,[Source:TAIR;Acc:AT1G76250]	0.455793	0.536366
AT1G78120	AT1G78120	Tetratricopeptide repeat (TPR)-like superfamily protein,[Source:TAIR;Acc:AT1G78120]	0.619578	0.401831
AT1G79640	AT1G79640	Protein kinase superfamily protein,[Source:TAIR;Acc:AT1G79640]	2.04293	1.64504
AT1G79760	DTA4	downstream target of AGL15-4,[Source:TAIR;Acc:AT1G79760]	0.418966	0.324038
AT1G80130	AT1G80130	Tetratricopeptide repeat (TPR)-like superfamily protein,[Source:TAIR;Acc:AT1G80130]	3.59986	2.66087
AT1G80280	AT1G80280	alpha/beta-Hydrolases superfamily protein,[Source:TAIR;Acc:AT1G80280]	0.454984	0.611832
AT1G80340	GA4H	gibberellin 3-oxidase 2,[Source:TAIR;Acc:AT1G80340]	0.587178	0.315782
AT1G80960	AT1G80960	F-box and Leucine Rich Repeat domains containing protein,[Source:TAIR;Acc:AT1G80960]	0.531788	0.267683
AT2G01210	AT2G01210	Leucine-rich repeat protein kinase family protein,[Source:TAIR;Acc:AT2G01210]	0.612066	0.334608
AT2G01880	PAP7	purple acid phosphatase 7,[Source:TAIR;Acc:AT2G01880]	0.512051	0.307841
AT2G03090	ATEXPA15	expansin A15,[Source:TAIR;Acc:AT2G03090]	0.497083	0.575613
AT2G04800	AT2G04800	unknown protein,[Source:TAIR;Acc:AT2G04800]	0.293396	0.416377
AT2G05765	AT2G05765	snoRNA,[Source:TAIR;Acc:AT2G05765]	1.56724	2.56526
AT2G05910	AT2G05910	Protein of unknown function (DUF567),[Source:TAIR;Acc:AT2G05910]	2.27891	1.79553
AT2G07213	AT2G07213	other RNA,[Source:TAIR;Acc:AT2G07213]	0.177252	0.228059
AT2G15080	AtRLP19	receptor like protein 19,[Source:TAIR;Acc:AT2G15080]	2.92448	1.74819
AT2G15370	FUT5	fucosyltransferase 5,[Source:TAIR;Acc:AT2G15370]	0.433274	0.256515
AT2G15890	MEE14	maternal effect embryo arrest 14,[Source:TAIR;Acc:AT2G15890]	2.4696	1.79155
AT2G16760	AT2G16760	Calcium-dependent phosphotriesterase superfamily protein,[Source:TAIR;Acc:AT2G16760]	0.519897	0.359123
AT2G16980	AT2G16980	Major facilitator superfamily protein,[Source:TAIR;Acc:AT2G16980]	0.212701	0.388241
AT2G17040	anac036	NAC domain containing protein 36,[Source:TAIR;Acc:AT2G17040]	3.44033	1.60218
AT2G17300	AT2G17300	unknown protein,[Source:TAIR;Acc:AT2G17300]	0.525707	0.447012
AT2G18000	TAF14	TBP-associated factor 14,[Source:TAIR;Acc:AT2G18000]	3.32351	2.2804
AT2G18193	AT2G18193	P-loop containing nucleoside triphosphate hydrolases superfamily protein,[Source:TAIR;Acc:AT2G18193]	2.06391	3.32656
AT2G18540	AT2G18540	RmlC-like cupins superfamily protein,[Source:TAIR;Acc:AT2G18540]	0.553022	0.164205
AT2G18600	AT2G18600	Ubiquitin-conjugating enzyme family protein,[Source:TAIR;Acc:AT2G18600]	6.02621	2.6545
AT2G18800	ATXTH21	xyloglucan endotransglucosylase/hydrolase 21,[Source:TAIR;Acc:AT2G18800]	0.195908	0.0892429
AT2G20722	AT2G20722	snoRNA,[Source:TAIR;Acc:AT2G20722]	2.12679	2.22317
AT2G20750	ATEXPB1	expansin B1,[Source:TAIR;Acc:AT2G20750]	0.655796	0.319618
AT2G22122	AT2G22122	unknown protein,[Source:TAIR;Acc:AT2G22122]	0.569707	0.289173
AT2G22330	CYP79B3	cytochrome P450, family 79, subfamily B, polypeptide 3,[Source:TAIR;Acc:AT2G22330]	0.612974	0.378589
AT2G22510	AT2G22510	hydroxyproline-rich glycoprotein family protein,[Source:TAIR;Acc:AT2G22510]	0.537209	0.360183
AT2G22590	AT2G22590	UDP-Glycosyltransferase superfamily protein,[Source:TAIR;Acc:AT2G22590]	0.640645	0.128218
AT2G22930	AT2G22930	UDP-Glycosyltransferase superfamily protein,[Source:TAIR;Acc:AT2G22930]	0.531788	0.205336
AT2G23540	AT2G23540	GDSL-like Lipase/Acylhydrolase superfamily protein,[Source:TAIR;Acc:AT2G23540]	0.50792	0.486857
AT2G24430	ANAC039	NAC domain containing protein 38,[Source:TAIR;Acc:AT2G24430]	0.514618	0.497539
AT2G25000	WRKY60	WRKY DNA-binding protein 60,[Source:TAIR;Acc:AT2G25000]	2.21474	1.89933
AT2G25160	CYP82F1	cytochrome P450, family 82, subfamily F, polypeptide 1,[Source:TAIR;Acc:AT2G25160]	0.638071	0.231984
AT2G26040	PYL2	PYR1-like 2,[Source:TAIR;Acc:AT2G26040]	0.560731	0.474747
AT2G27370	AT2G27370	Uncharacterised protein family (UPF0497),[Source:TAIR;Acc:AT2G27370]	0.272067	0.230877
AT2G28120	AT2G28120	Major facilitator superfamily protein,[Source:TAIR;Acc:AT2G28120]	2.98356	1.77977
AT2G28140	AT2G28140	Protein of unknown function (DUF1635),[Source:TAIR;Acc:AT2G28140]	3.19028	1.65642
AT2G28490	AT2G28490	RmlC-like cupins superfamily protein,[Source:TAIR;Acc:AT2G28490]	0.19178	0.13678
AT2G28500	LBD11	LOB domain-containing protein 11,[Source:TAIR;Acc:AT2G28500]	5.01404	2.47464
AT2G28671	AT2G28671	unknown protein,[Source:TAIR;Acc:AT2G28671]	0.445382	0.370229
AT2G28671	AT2G28671	unknown protein,[Source:TAIR;Acc:AT2G28671]	0.447354	0.377134
AT2G28780	AT2G28780	unknown protein,[Source:TAIR;Acc:AT2G28780]	0.397895	0.217845
AT2G28990	AT2G28990	Leucine-rich repeat protein kinase family protein,[Source:TAIR;Acc:AT2G28990]	0.39881	0.429089
AT2G29130	LAC2	laccase 2,[Source:TAIR;Acc:AT2G29130]	0.18496	0.0891971
AT2G29670	AT2G29670	Tetratricopeptide repeat (TPR)-like superfamily protein,[Source:TAIR;Acc:AT2G29670]	2.8048	1.70133
AT2G30250	WRKY25	WRKY DNA-binding protein 25,[Source:TAIR;Acc:AT2G30250]	1.8688	2.27061
AT2G30360	CIPK11	SOS3-interacting protein 4,[Source:TAIR;Acc:AT2G30360]	2.29914	1.82374
AT2G30360	CIPK11	SOS3-interacting protein 4,[Source:TAIR;Acc:AT2G30360]	2.27608	1.90181
AT2G30790	PSBP-2	photosystem II subunit P-2,[Source:TAIR;Acc:AT2G30790]	2.02064	1.65313
AT2G31230	ATERF15	ethylene-responsive element binding factor 15,[Source:TAIR;Acc:AT2G31230]	0.652004	0.486057
AT2G32280	AT2G32280	Protein of unknown function (DUF1218),[Source:TAIR;Acc:AT2G32280]	1.61831	2.05221
AT2G32510	MAPKKK17	mitogen-activated protein kinase kinase kinase 17,[Source:TAIR;Acc:AT2G32510]	0.451597	0.390912
AT2G32990	AtGH9B8	glycosyl hydrolase 9B8,[Source:TAIR;Acc:AT2G32990]	0.589951	0.274418
AT2G33790	ATAGP30	arabinogalactan protein 30,[Source:TAIR;Acc:AT2G33790]	0.37195	0.101062
AT2G33830	AT2G33830	Dormancy/auxin associated family protein,[Source:TAIR;Acc:AT2G33830]	0.334741	0.657286
AT2G33850	AT2G33850	unknown protein,[Source:TAIR;Acc:AT2G33850]	1.56378	2.05287
AT2G34190	AT2G34190	Xanthine/uracil permease family protein,[Source:TAIR;Acc:AT2G34190]	0.316769	0.553758
AT2G34610	AT2G34610	unknown protein,[Source:TAIR;Acc:AT2G34610]	0.461846	0.385961
AT2G35380	AT2G35380	Peroxidase superfamily protein,[Source:TAIR;Acc:AT2G35380]	0.484471	0.53914
AT2G35765	AT2G35765	unknown protein,[Source:TAIR;Acc:AT2G35765]	0.653273	0.207092
AT2G35980	YLS9	Late embryogenesis abundant (LEA) hydroxyproline-rich glycoprotein family,[Source:TAIR;Acc:AT2G35980]	0.366744	0.488674
AT2G36080	AT2G36080	AP2/B3-like transcriptional factor family protein,[Source:TAIR;Acc:AT2G36080]	1.64431	2.49725
AT2G36090	AT2G36090	F-box family protein,[Source:TAIR;Acc:AT2G36090]	0.449411	0.356223
AT2G36640	ATECP63	embryonic cell protein 63,[Source:TAIR;Acc:AT2G36640]	0.38503	0.152045
AT2G37440	AT2G37440	DNAse I-like superfamily protein,[Source:TAIR;Acc:AT2G37440]	0.531749	0.281117
AT2G37870	AT2G37870	Bifunctional inhibitor/lipid-transfer protein/seed storage 2S albumin superfamily protein,[Source:TAIR;Acc:AT2G37870]	0.347696	0.286864
AT2G38060	PHT4;2	phosphate transporter 4;2,[Source:TAIR;Acc:AT2G38060]	0.66104	0.459037
AT2G38080	IRX12	Laccase/Diphenol oxidase family protein,[Source:TAIR;Acc:AT2G38080]	0.51876	0.395625
AT2G38250	AT2G38250	Homeodomain-like superfamily protein,[Source:TAIR;Acc:AT2G38250]	2.88392	2.05225
AT2G38390	AT2G38390	Peroxidase superfamily protein,[Source:TAIR;Acc:AT2G38390]	0.287628	0.516632
AT2G38530	LTP2	lipid transfer protein 2,[Source:TAIR;Acc:AT2G38530]	3.64855	1.90695
AT2G39040	AT2G39040	Peroxidase superfamily protein,[Source:TAIR;Acc:AT2G39040]	0.298277	0.126689
AT2G39110	AT2G39110	Protein kinase superfamily protein,[Source:TAIR;Acc:AT2G39110]	0.60161	0.407751
AT2G39310	JAL22	jacalin-related lectin 22,[Source:TAIR;Acc:AT2G39310]	2.04956	1.63418
AT2G39400	AT2G39400	alpha/beta-Hydrolases superfamily protein,[Source:TAIR;Acc:AT2G39400]	2.48147	2.91007
AT2G39430	AT2G39430	Disease resistance-responsive (dirigent-like protein) family protein,[Source:TAIR;Acc:AT2G39430]	0.453204	0.361257
AT2G39530	AT2G39530	Uncharacterised protein family (UPF0497),[Source:TAIR;Acc:AT2G39530]	0.452171	0.297416
AT2G39980	AT2G39980	HXXXD-type acyl-transferase family protein,[Source:TAIR;Acc:AT2G39980]	2.15762	1.79381
AT2G40000	HSPRO2	ortholog of sugar beet HS1 PRO-1 2,[Source:TAIR;Acc:AT2G40000]	3.43231	1.51456
AT2G40080	ELF4	Protein of unknown function (DUF1313),[Source:TAIR;Acc:AT2G40080]	0.484889	0.312287
AT2G40113	AT2G40113	Pollen Ole e 1 allergen and extensin family protein,[Source:TAIR;Acc:AT2G40113]	0.651779	0.370544
AT2G40170	ATEM6	Stress induced protein,[Source:TAIR;Acc:AT2G40170]	0.586791	0.0603602
AT2G40200	AT2G40200	basic helix-loop-helix (bHLH) DNA-binding superfamily protein,[Source:TAIR;Acc:AT2G40200]	2.44304	4.32445
AT2G40320	TBL33	TRICHOME BIREFRINGENCE-LIKE 33,[Source:TAIR;Acc:AT2G40320]	0.614823	0.354691
AT2G40670	RR16	response regulator 16,[Source:TAIR;Acc:AT2G40670]	0.478598	0.615662
AT2G41480	AT2G41480	Peroxidase superfamily protein,[Source:TAIR;Acc:AT2G41480]	4.9082	2.05221
AT2G41660	MIZ1	Protein of unknown function, DUF617,[Source:TAIR;Acc:AT2G41660]	0.530504	0.299199
AT2G42560	AT2G42560	late embryogenesis abundant domain-containing protein / LEA domain-containing protein,[Source:TAIR;Acc:AT2G42560]	0.393017	0.104692
AT2G42840	PDF1	protodermal factor 1,[Source:TAIR;Acc:AT2G42840]	0.42347	0.470143
AT2G43050	ATPMEPCRD	Plant invertase/pectin methylesterase inhibitor superfamily,[Source:TAIR;Acc:AT2G43050]	0.36609	0.279851
AT2G43620	AT2G43620	Chitinase family protein,[Source:TAIR;Acc:AT2G43620]	2.01932	3.28947
AT2G43670	AT2G43670	Carbohydrate-binding X8 domain superfamily protein,[Source:TAIR;Acc:AT2G43670]	0.476768	0.263127
AT2G44100	ATGDI1	guanosine nucleotide diphosphate dissociation inhibitor 1,[Source:TAIR;Acc:AT2G44100]	0.283614	0.395464
AT2G44940	AT2G44940	Integrase-type DNA-binding superfamily protein,[Source:TAIR;Acc:AT2G44940]	0.159515	0.584492
AT2G45460	AT2G45460	SMAD/FHA domain-containing protein,[Source:TAIR;Acc:AT2G45460]	2.05929	1.98453
AT2G45480	AtGRF9	growth-regulating factor 9,[Source:TAIR;Acc:AT2G45480]	0.393869	0.256556
AT2G46660	CYP78A6	cytochrome P450, family 78, subfamily A, polypeptide 6,[Source:TAIR;Acc:AT2G46660]	0.531732	0.47233
AT2G47010	AT2G47010	unknown protein,[Source:TAIR;Acc:AT2G47010]	2.43285	1.73565
AT2G47460	MYB12	myb domain protein 12,[Source:TAIR;Acc:AT2G47460]	0.508609	0.399022
AT2G47680	AT2G47680	zinc finger (CCCH type) helicase family protein,[Source:TAIR;Acc:AT2G47680]	2.9111	1.94673
AT2G47780	AT2G47780	Rubber elongation factor protein (REF),[Source:TAIR;Acc:AT2G47780]	5.38819	1.86859
AT2G47890	AT2G47890	B-box type zinc finger protein with CCT domain,[Source:TAIR;Acc:AT2G47890]	0.487224	0.618753
AT2G48090	AT2G48090	unknown protein,[Source:TAIR;Acc:AT2G48090]	1.57478	2.71611
AT2G48130	AT2G48130	Bifunctional inhibitor/lipid-transfer protein/seed storage 2S albumin superfamily protein,[Source:TAIR;Acc:AT2G48130]	0.417357	0.286814
AT2G48140	EDA4	Bifunctional inhibitor/lipid-transfer protein/seed storage 2S albumin superfamily protein,[Source:TAIR;Acc:AT2G48140]	0.399185	0.438182
AT3G01050	MUB1	membrane-anchored ubiquitin-fold protein 1 precursor,[Source:TAIR;Acc:AT3G01050]	0.508605	0.470791
AT3G01190	AT3G01190	Peroxidase superfamily protein,[Source:TAIR;Acc:AT3G01190]	0.405003	0.284306
AT3G01260	AT3G01260	Galactose mutarotase-like superfamily protein,[Source:TAIR;Acc:AT3G01260]	0.345617	0.253977
AT3G01570	AT3G01570	Oleosin family protein,[Source:TAIR;Acc:AT3G01570]	0.191431	0.399076
AT3G01600	anac044	NAC domain containing protein 44,[Source:TAIR;Acc:AT3G01600]	2.37359	2.15019
AT3G01960	AT3G01960	unknown protein,[Source:TAIR;Acc:AT3G01960]	0.319065	0.304018
AT3G02840	AT3G02840	ARM repeat superfamily protein,[Source:TAIR;Acc:AT3G02840]	0.455773	0.219244
AT3G02885	GASA5	GAST1 protein homolog 5,[Source:TAIR;Acc:AT3G02885]	1.7724	2.59959
AT3G04440	AT3G04440	Plasma-membrane choline transporter family protein,[Source:TAIR;Acc:AT3G04440]	0.531718	0.48138
AT3G05470	AT3G05470	Actin-binding FH2 (formin homology 2) family protein,[Source:TAIR;Acc:AT3G05470]	0.449926	0.665055
AT3G05600	AT3G05600	alpha/beta-Hydrolases superfamily protein,[Source:TAIR;Acc:AT3G05600]	0.415258	0.334608
AT3G05650	AtRLP32	receptor like protein 32,[Source:TAIR;Acc:AT3G05650]	1.67489	2.30864
AT3G05727	AT3G05727	S locus-related glycoprotein 1 (SLR1) binding pollen coat protein family,[Source:TAIR;Acc:AT3G05727]	0.266531	0.0133347
AT3G05890	RCI2B	Low temperature and salt responsive protein family,[Source:TAIR;Acc:AT3G05890]	0.540167	0.343465
AT3G06390	AT3G06390	Uncharacterised protein family (UPF0497),[Source:TAIR;Acc:AT3G06390]	0.393181	0.43257
AT3G07350	AT3G07350	Protein of unknown function (DUF506),[Source:TAIR;Acc:AT3G07350]	3.33558	1.58208
AT3G08770	LTP6	lipid transfer protein 6,[Source:TAIR;Acc:AT3G08770]	0.474521	0.251631
AT3G08860	PYD4	PYRIMIDINE 4,[Source:TAIR;Acc:AT3G08860]	1.9244	3.07831
AT3G09922	IPS1	induced by phosphate starvation1,[Source:TAIR;Acc:AT3G09922]	0.478598	0.093338
AT3G10190	AT3G10190	Calcium-binding EF-hand family protein,[Source:TAIR;Acc:AT3G10190]	1.64001	2.06851
AT3G10340	PAL4	phenylalanine ammonia-lyase 4,[Source:TAIR;Acc:AT3G10340]	0.517525	0.276185
AT3G10930	AT3G10930	unknown protein,[Source:TAIR;Acc:AT3G10930]	2.57483	2.23317
AT3G11340	AT3G11340	UDP-Glycosyltransferase superfamily protein,[Source:TAIR;Acc:AT3G11340]	0.600269	0.435416
AT3G11430	ATGPAT5	glycerol-3-phosphate acyltransferase 5,[Source:TAIR;Acc:AT3G11430]	0.427206	0.243698
AT3G11550	AT3G11550	Uncharacterised protein family (UPF0497),[Source:TAIR;Acc:AT3G11550]	0.335824	0.467048
AT3G12955	AT3G12955	SAUR-like auxin-responsive protein family,[Source:TAIR;Acc:AT3G12955]	0.354486	0.231724
AT3G13435	AT3G13435	unknown protein,[Source:TAIR;Acc:AT3G13435]	0.531765	0.306497
AT3G13590	AT3G13590	Cysteine/Histidine-rich C1 domain family protein,[Source:TAIR;Acc:AT3G13590]	2.48156	1.60314
AT3G13600	AT3G13600	calmodulin-binding family protein,[Source:TAIR;Acc:AT3G13600]	0.562987	0.320684
AT3G13960	AtGRF5	growth-regulating factor 5,[Source:TAIR;Acc:AT3G13960]	0.275358	0.244291
AT3G14550	GGPS3	geranylgeranyl pyrophosphate synthase 3,[Source:TAIR;Acc:AT3G14550]	0.428798	0.384773
AT3G14620	CYP72A8	cytochrome P450, family 72, subfamily A, polypeptide 8,[Source:TAIR;Acc:AT3G14620]	1.53011	2.22461
AT3G15670	AT3G15670	Late embryogenesis abundant protein (LEA) family protein,[Source:TAIR;Acc:AT3G15670]	0.176528	0.14989
AT3G15720	AT3G15720	Pectin lyase-like superfamily protein,[Source:TAIR;Acc:AT3G15720]	3.6895	2.59231
AT3G16360	AHP4	HPT phosphotransmitter 4,[Source:TAIR;Acc:AT3G16360]	5.55399	3.48898
AT3G16920	CTL2	chitinase-like protein 2,[Source:TAIR;Acc:AT3G16920]	0.597684	0.486897
AT3G17690	ATCNGC19	cyclic nucleotide gated channel 19,[Source:TAIR;Acc:AT3G17690]	5.31794	3.22486
AT3G18610	PARLL1	nucleolin like 2,[Source:TAIR;Acc:AT3G18610]	2.06614	1.71017
AT3G19210	RAD54	homolog of RAD54,[Source:TAIR;Acc:AT3G19210]	2.38475	1.5071
AT3G20395	AT3G20395	RING/U-box superfamily protein,[Source:TAIR;Acc:AT3G20395]	3.19039	2.25974
AT3G20470	GRP-5	glycine-rich protein 5,[Source:TAIR;Acc:AT3G20470]	2.57878	3.44663
AT3G20865	AGP40	arabinogalactan protein 40,[Source:TAIR;Acc:AT3G20865]	0.518749	0.422543
AT3G21020	AT3G21020	transposable element gene,[Source:TAIR;Acc:AT3G21020]	1.99399	2.67675
AT3G21030	AT3G21030	transposable element gene,[Source:TAIR;Acc:AT3G21030]	3.58892	2.94985
AT3G21040	AT3G21040	transposable element gene,[Source:TAIR;Acc:AT3G21040]	17.1694	4.10424
AT3G21090	AT3G21090	ABC-2 type transporter family protein,[Source:TAIR;Acc:AT3G21090]	2.25203	2.24699
AT3G21180	ACA9	autoinhibited Ca(2+)-ATPase 9,[Source:TAIR;Acc:AT3G21180]	0.531732	0.264814
AT3G21310	AT3G21310	Core-2/I-branching beta-1,6-N-acetylglucosaminyltransferase family protein,[Source:TAIR;Acc:AT3G21310]	3.26626	2.65066
AT3G22142	AT3G22142	Bifunctional inhibitor/lipid-transfer protein/seed storage 2S albumin superfamily protein,[Source:TAIR;Acc:AT3G22142]	2.62848	1.79937
AT3G22550	AT3G22550	Protein of unknown function (DUF581),[Source:TAIR;Acc:AT3G22550]	2.82694	1.81722
AT3G22560	AT3G22560	Acyl-CoA N-acyltransferases (NAT) superfamily protein,[Source:TAIR;Acc:AT3G22560]	2.01694	2.61171
AT3G22570	AT3G22570	Bifunctional inhibitor/lipid-transfer protein/seed storage 2S albumin superfamily protein,[Source:TAIR;Acc:AT3G22570]	0.394491	0.331509
AT3G22600	AT3G22600	Bifunctional inhibitor/lipid-transfer protein/seed storage 2S albumin superfamily protein,[Source:TAIR;Acc:AT3G22600]	0.524554	0.286366
AT3G22620	AT3G22620	Bifunctional inhibitor/lipid-transfer protein/seed storage 2S albumin superfamily protein,[Source:TAIR;Acc:AT3G22620]	0.347798	0.206583
AT3G22640	PAP85	cupin family protein,[Source:TAIR;Acc:AT3G22640]	0.117238	0.586326
AT3G22910	AT3G22910	ATPase E1-E2 type family protein / haloacid dehalogenase-like hydrolase family protein,[Source:TAIR;Acc:AT3G22910]	5.14954	2.39413
AT3G23175	AT3G23175	HR-like lesion-inducing protein-related,[Source:TAIR;Acc:AT3G23175]	0.643688	0.41936
AT3G23800	SBP3	selenium-binding protein 3,[Source:TAIR;Acc:AT3G23800]	0.621003	0.43975
AT3G24020	AT3G24020	Disease resistance-responsive (dirigent-like protein) family protein,[Source:TAIR;Acc:AT3G24020]	0.420237	0.448128
AT3G24300	AMT1;3	ammonium transporter 1;3,[Source:TAIR;Acc:AT3G24300]	0.570402	0.419361
AT3G25190	AT3G25190	Vacuolar iron transporter (VIT) family protein,[Source:TAIR;Acc:AT3G25190]	0.491863	0.623328
AT3G25250	AGC2-1	AGC (cAMP-dependent, cGMP-dependent and protein kinase C) kinase family protein,[Source:TAIR;Acc:AT3G25250]	1.70911	3.07845
AT3G25620	AT3G25620	ABC-2 type transporter family protein,[Source:TAIR;Acc:AT3G25620]	0.485473	0.634566
AT3G25710	BHLH32	basic helix-loop-helix 32,[Source:TAIR;Acc:AT3G25710]	0.601331	0.428623
AT3G25730	EDF3	ethylene response DNA binding factor 3,[Source:TAIR;Acc:AT3G25730]	2.14559	1.63096
AT3G25760	AOC1	allene oxide cyclase 1,[Source:TAIR;Acc:AT3G25760]	2.16238	1.8767
AT3G25820	TPS-CIN	terpene synthase-like sequence-1,8-cineole,[Source:TAIR;Acc:AT3G25820]	0.19713	0.281002
AT3G25830	ATTPS-CIN	terpene synthase-like sequence-1,8-cineole,[Source:TAIR;Acc:AT3G25830]	0.225738	0.267338
AT3G26610	AT3G26610	Pectin lyase-like superfamily protein,[Source:TAIR;Acc:AT3G26610]	0.481561	0.270049
AT3G27025	AT3G27025	unknown protein,[Source:TAIR;Acc:AT3G27025]	5.91558	2.05221
AT3G27150	AT3G27150	Galactose oxidase/kelch repeat superfamily protein,[Source:TAIR;Acc:AT3G27150]	0.453914	0.26155
AT3G27400	AT3G27400	Pectin lyase-like superfamily protein,[Source:TAIR;Acc:AT3G27400]	4.11603	1.68042
AT3G27620	AOX1C	alternative oxidase 1C,[Source:TAIR;Acc:AT3G27620]	5.11765	2.3372
AT3G27630	AT3G27630	unknown protein,[Source:TAIR;Acc:AT3G27630]	12.6112	4.44634
AT3G28290	AT14A	Protein of unknown function (DUF677),[Source:TAIR;Acc:AT3G28290]	2.46113	1.86317
AT3G28300	AT14A	Protein of unknown function (DUF677),[Source:TAIR;Acc:AT3G28300]	2.02314	1.6284
AT3G28500	AT3G28500	60S acidic ribosomal protein family,[Source:TAIR;Acc:AT3G28500]	12.9716	4.27532
AT3G28540	AT3G28540	P-loop containing nucleoside triphosphate hydrolases superfamily protein,[Source:TAIR;Acc:AT3G28540]	4.77515	1.69313
AT3G28580	AT3G28580	P-loop containing nucleoside triphosphate hydrolases superfamily protein,[Source:TAIR;Acc:AT3G28580]	3.20839	11.2852
AT3G29630	AT3G29630	UDP-Glycosyltransferase superfamily protein,[Source:TAIR;Acc:AT3G29630]	0.483423	0.228031
AT3G29780	RALFL27	ralf-like 27,[Source:TAIR;Acc:AT3G29780]	0.225597	0.217053
AT3G32920	AT3G32920	P-loop containing nucleoside triphosphate hydrolases superfamily protein,[Source:TAIR;Acc:AT3G32920]	7.23013	4.2511
AT3G43190	SUS4	sucrose synthase 4,[Source:TAIR;Acc:AT3G43190]	0.543026	0.410442
AT3G44326	AT3G44326	F-box family protein,[Source:TAIR;Acc:AT3G44326]	0.203321	0.164174
AT3G45070	AT3G45070	P-loop containing nucleoside triphosphate hydrolases superfamily protein,[Source:TAIR;Acc:AT3G45070]	0.544083	0.324038
AT3G45140	LOX2	lipoxygenase 2,[Source:TAIR;Acc:AT3G45140]	2.07129	2.71202
AT3G45160	AT3G45160	Putative membrane lipoprotein,[Source:TAIR;Acc:AT3G45160]	0.659129	0.441123
AT3G45700	AT3G45700	Major facilitator superfamily protein,[Source:TAIR;Acc:AT3G45700]	0.301328	0.0597732
AT3G45710	AT3G45710	Major facilitator superfamily protein,[Source:TAIR;Acc:AT3G45710]	0.403979	0.377675
AT3G45730	AT3G45730	unknown protein,[Source:TAIR;Acc:AT3G45730]	1.75431	2.68016
AT3G45840	AT3G45840	Cysteine/Histidine-rich C1 domain family protein,[Source:TAIR;Acc:AT3G45840]	0.613556	0.439779
AT3G46110	AT3G46110	Domain of unknown function (DUF966),[Source:TAIR;Acc:AT3G46110]	1.75703	2.56526
AT3G46220	AT3G46220	unknown protein,[Source:TAIR;Acc:AT3G46220]	2.19626	4.50117
AT3G47040	AT3G47040	Glycosyl hydrolase family protein,[Source:TAIR;Acc:AT3G47040]	0.48031	0.622954
AT3G47380	AT3G47380	Plant invertase/pectin methylesterase inhibitor superfamily protein,[Source:TAIR;Acc:AT3G47380]	3.45632	3.24944
AT3G49330	AT3G49330	Plant invertase/pectin methylesterase inhibitor superfamily protein,[Source:TAIR;Acc:AT3G49330]	0.583234	0.259011
AT3G49760	AtbZIP5	basic leucine-zipper 5,[Source:TAIR;Acc:AT3G49760]	0.463576	0.5746
AT3G49845	AT3G49845	unknown protein,[Source:TAIR;Acc:AT3G49845]	0.325564	0.303494
AT3G49970	AT3G49970	Phototropic-responsive NPH3 family protein,[Source:TAIR;Acc:AT3G49970]	1.62053	4.92498
AT3G50400	AT3G50400	GDSL-like Lipase/Acylhydrolase superfamily protein,[Source:TAIR;Acc:AT3G50400]	0.410183	0.259339
AT3G50760	GATL2	galacturonosyltransferase-like 2,[Source:TAIR;Acc:AT3G50760]	2.09564	1.77228
AT3G50930	BCS1	cytochrome BC1 synthesis,[Source:TAIR;Acc:AT3G50930]	3.12959	1.86715
AT3G50970	LTI30	dehydrin family protein,[Source:TAIR;Acc:AT3G50970]	0.562866	0.408676
AT3G50980	XERO1	dehydrin xero 1,[Source:TAIR;Acc:AT3G50980]	0.27744	0.287339
AT3G51350	AT3G51350	Eukaryotic aspartyl protease family protein,[Source:TAIR;Acc:AT3G51350]	0.332348	0.314115
AT3G51750	AT3G51750	unknown protein,[Source:TAIR;Acc:AT3G51750]	0.414554	0.559701
AT3G51810	ATEM1	Stress induced protein,[Source:TAIR;Acc:AT3G51810]	0.0728431	0.102581
AT3G51930	AT3G51930	Transducin/WD40 repeat-like superfamily protein,[Source:TAIR;Acc:AT3G51930]	0.657187	0.491661
AT3G52115	ATGR1	gamma response gene 1,[Source:TAIR;Acc:AT3G52115]	2.16634	1.56356
AT3G52535	AT3G52535	other RNA,[Source:TAIR;Acc:AT3G52535]	0.372223	0.535351
AT3G53090	UPL7	ubiquitin-protein ligase 7,[Source:TAIR;Acc:AT3G53090]	0.597784	0.41044
AT3G53210	AT3G53210	nodulin MtN21 /EamA-like transporter family protein,[Source:TAIR;Acc:AT3G53210]	1.80588	2.44865
AT3G54940	AT3G54940	Papain family cysteine protease,[Source:TAIR;Acc:AT3G54940]	0.464506	0.0892277
AT3G55230	AT3G55230	Disease resistance-responsive (dirigent-like protein) family protein,[Source:TAIR;Acc:AT3G55230]	0.522445	0.43115
AT3G56230	AT3G56230	BTB/POZ domain-containing protein,[Source:TAIR;Acc:AT3G56230]	0.493761	0.452684
AT3G57010	AT3G57010	Calcium-dependent phosphotriesterase superfamily protein,[Source:TAIR;Acc:AT3G57010]	0.439894	0.309501
AT3G57640	AT3G57640	Protein kinase superfamily protein,[Source:TAIR;Acc:AT3G57640]	1.89892	2.12067
AT3G58270	AT3G58270	Arabidopsis phospholipase-like protein (PEARLI 4) with TRAF-like domain,[Source:TAIR;Acc:AT3G58270]	4.0057	2.74953
AT3G59690	IQD13	IQ-domain 13,[Source:TAIR;Acc:AT3G59690]	0.525752	0.452095
AT3G59690	IQD13	IQ-domain 13,[Source:TAIR;Acc:AT3G59690]	0.537569	0.459173
AT3G59930	AT3G59930	Encodes a defensin-like (DEFL) family protein,,[Source:TAIR;Acc:AT3G59930]	0.491556	0.416533
AT3G59940	AT3G59940	Galactose oxidase/kelch repeat superfamily protein,[Source:TAIR;Acc:AT3G59940]	3.7213	1.50306
AT3G61410	AT3G61410	No description	0.598171	0.419776
AT3G63470	scpl40	serine carboxypeptidase-like 40,[Source:TAIR;Acc:AT3G63470]	0.641096	0.4416
AT4G00910	AT4G00910	Aluminium activated malate transporter family protein,[Source:TAIR;Acc:AT4G00910]	0.577953	0.233665
AT4G01110	AT4G01110	unknown protein,[Source:TAIR;Acc:AT4G01110]	0.55488	0.231724
AT4G02090	AT4G02090	unknown protein,[Source:TAIR;Acc:AT4G02090]	0.367609	0.387194
AT4G02330	ATPMEPCRB	Plant invertase/pectin methylesterase inhibitor superfamily,[Source:TAIR;Acc:AT4G02330]	4.69541	1.62444
AT4G02390	APP	poly(ADP-ribose) polymerase,[Source:TAIR;Acc:AT4G02390]	5.12396	3.1604
AT4G02810	AT4G02810	Protein of unknown function (DUF3049),[Source:TAIR;Acc:AT4G02810]	0.620382	0.27629
AT4G03505	AT4G03505	No description	2.00489	1.56791
AT4G03540	AT4G03540	Uncharacterised protein family (UPF0497),[Source:TAIR;Acc:AT4G03540]	0.638103	0.457788
AT4G04410	AT4G04410	No description	2.22551	3.22081
AT4G08555	AT4G08555	unknown protein,[Source:TAIR;Acc:AT4G08555]	1.59506	4.48894
AT4G08910	AT4G08910	unknown protein,[Source:TAIR;Acc:AT4G08910]	0.449941	0.459995
AT4G09160	AT4G09160	SEC14 cytosolic factor family protein / phosphoglyceride transfer family protein,[Source:TAIR;Acc:AT4G09160]	0.403476	0.61033
AT4G09990	AT4G09990	Protein of unknown function (DUF579),[Source:TAIR;Acc:AT4G09990]	0.662742	0.406574
AT4G10310	HKT1	high-affinity K+ transporter 1,[Source:TAIR;Acc:AT4G10310]	0.52916	0.373705
AT4G11290	AT4G11290	Peroxidase superfamily protein,[Source:TAIR;Acc:AT4G11290]	0.538135	0.270564
AT4G11320	AT4G11320	Papain family cysteine protease,[Source:TAIR;Acc:AT4G11320]	0.133698	0.0763103
AT4G12735	AT4G12735	unknown protein,[Source:TAIR;Acc:AT4G12735]	3.49454	3.91774
AT4G12980	AT4G12980	Auxin-responsive family protein,[Source:TAIR;Acc:AT4G12980]	0.576509	0.442505
AT4G13310	CYP71A20	cytochrome P450, family 71, subfamily A, polypeptide 20,[Source:TAIR;Acc:AT4G13310]	0.393885	0.183781
AT4G13575	AT4G13575	unknown protein,[Source:TAIR;Acc:AT4G13575]	1.56988	4.46645
AT4G13710	AT4G13710	Pectin lyase-like superfamily protein,[Source:TAIR;Acc:AT4G13710]	0.515116	0.439762
AT4G14010	RALFL32	ralf-like 32,[Source:TAIR;Acc:AT4G14010]	0.528357	0.405039
AT4G14130	XTR7	xyloglucan endotransglucosylase/hydrolase 15,[Source:TAIR;Acc:AT4G14130]	0.545649	0.380276
AT4G14650	AT4G14650	unknown protein,[Source:TAIR;Acc:AT4G14650]	0.57063	0.328332
AT4G15290	ATCSLB05	Cellulose synthase family protein,[Source:TAIR;Acc:AT4G15290]	0.221565	0.124377
AT4G15340	ATPEN1	pentacyclic triterpene synthase 1,[Source:TAIR;Acc:AT4G15340]	0.42322	0.305847
AT4G15400	AT4G15400	HXXXD-type acyl-transferase family protein,[Source:TAIR;Acc:AT4G15400]	0.64099	0.493165
AT4G16240	AT4G16240	unknown protein,[Source:TAIR;Acc:AT4G16240]	2.68398	1.59609
AT4G17215	AT4G17215	Pollen Ole e 1 allergen and extensin family protein,[Source:TAIR;Acc:AT4G17215]	0.541052	0.466401
AT4G17220	ATMAP70-5	microtubule-associated proteins 70-5,[Source:TAIR;Acc:AT4G17220]	0.466869	0.322468
AT4G17270	AT4G17270	Mo25 family protein,[Source:TAIR;Acc:AT4G17270]	0.591979	0.448296
AT4G17710	HDG4	homeodomain GLABROUS 4,[Source:TAIR;Acc:AT4G17710]	34.024	14.3701
AT4G18170	WRKY28	WRKY DNA-binding protein 28,[Source:TAIR;Acc:AT4G18170]	2.56468	1.80342
AT4G18770	MYB98	myb domain protein 98,[Source:TAIR;Acc:AT4G18770]	0.409037	0.219874
AT4G18770	MYB98	myb domain protein 98,[Source:TAIR;Acc:AT4G18770]	0.587546	0.398603
AT4G19420	AT4G19420	Pectinacetylesterase family protein,[Source:TAIR;Acc:AT4G19420]	2.75187	2.59567
AT4G19570	AT4G19570	Chaperone DnaJ-domain superfamily protein,[Source:TAIR;Acc:AT4G19570]	3.95039	4.44693
AT4G19820	AT4G19820	Glycosyl hydrolase family protein with chitinase insertion domain,[Source:TAIR;Acc:AT4G19820]	0.531718	0.240137
AT4G20240	CYP71A27	cytochrome P450, family 71, subfamily A, polypeptide 27,[Source:TAIR;Acc:AT4G20240]	0.375973	0.231095
AT4G21070	ATBRCA1	breast cancer susceptibility1,[Source:TAIR;Acc:AT4G21070]	2.76694	1.50816
AT4G21650	AT4G21650	Subtilase family protein,[Source:TAIR;Acc:AT4G21650]	0.244071	0.423851
AT4G21820	AT4G21820	binding;calmodulin binding,[Source:TAIR;Acc:AT4G21820]	0.398793	0.554103
AT4G21830	ATMSRB7	methionine sulfoxide reductase B7,[Source:TAIR;Acc:AT4G21830]	0.272067	0.190889
AT4G22212	AT4G22212	Arabidopsis defensin-like protein,[Source:TAIR;Acc:AT4G22212]	0.593229	0.410439
AT4G22460	AT4G22460	Bifunctional inhibitor/lipid-transfer protein/seed storage 2S albumin superfamily protein,[Source:TAIR;Acc:AT4G22460]	0.279885	0.175203
AT4G22470	AT4G22470	protease inhibitor/seed storage/lipid transfer protein (LTP) family protein,[Source:TAIR;Acc:AT4G22470]	2.48141	1.8449
AT4G22485	AT4G22485	Bifunctional inhibitor/lipid-transfer protein/seed storage 2S albumin superfamily protein,[Source:TAIR;Acc:AT4G22485]	0.269044	0
AT4G22490	AT4G22490	Bifunctional inhibitor/lipid-transfer protein/seed storage 2S albumin superfamily protein,[Source:TAIR;Acc:AT4G22490]	0.228322	0.00407443
AT4G22505	AT4G22505	Bifunctional inhibitor/lipid-transfer protein/seed storage 2S albumin superfamily protein,[Source:TAIR;Acc:AT4G22505]	0.242217	0.0014668
AT4G22510	AT4G22510	unknown protein,[Source:TAIR;Acc:AT4G22510]	0.229526	0
AT4G22513	AT4G22513	Bifunctional inhibitor/lipid-transfer protein/seed storage 2S albumin superfamily protein,[Source:TAIR;Acc:AT4G22513]	0.231714	0
AT4G22513	AT4G22513	Bifunctional inhibitor/lipid-transfer protein/seed storage 2S albumin superfamily protein,[Source:TAIR;Acc:AT4G22513]	0.253937	0
AT4G22520	AT4G22520	Bifunctional inhibitor/lipid-transfer protein/seed storage 2S albumin superfamily protein,[Source:TAIR;Acc:AT4G22520]	0.362033	0.0233355
AT4G22666	AT4G22666	Bifunctional inhibitor/lipid-transfer protein/seed storage 2S albumin superfamily protein,[Source:TAIR;Acc:AT4G22666]	0.445951	0.184824
AT4G22960	AT4G22960	Protein of unknown function (DUF544),[Source:TAIR;Acc:AT4G22960]	39.3406	48.2418
AT4G23220	CRK14	cysteine-rich RLK (RECEPTOR-like protein kinase) 14,[Source:TAIR;Acc:AT4G23220]	2.69399	4.30936
AT4G23600	CORI3	Tyrosine transaminase family protein,[Source:TAIR;Acc:AT4G23600]	3.09026	4.98381
AT4G23680	AT4G23680	Polyketide cyclase/dehydrase and lipid transport superfamily protein,[Source:TAIR;Acc:AT4G23680]	3.00872	1.57767
AT4G23720	AT4G23720	Protein of unknown function (DUF1191),[Source:TAIR;Acc:AT4G23720]	9.21842	2.56539
AT4G23750	CRF2	cytokinin response factor 2,[Source:TAIR;Acc:AT4G23750]	0.420364	0.508592
AT4G24310	AT4G24310	Protein of unknown function (DUF679),[Source:TAIR;Acc:AT4G24310]	0.493761	0.279855
AT4G25200	ATHSP23,6-MITO	mitochondrion-localized small heat shock protein 23,6,[Source:TAIR;Acc:AT4G25200]	1.65825	2.8135
AT4G25250	AT4G25250	Plant invertase/pectin methylesterase inhibitor superfamily protein,[Source:TAIR;Acc:AT4G25250]	0.371001	0.167909
AT4G26220	AT4G26220	S-adenosyl-L-methionine-dependent methyltransferases superfamily protein,[Source:TAIR;Acc:AT4G26220]	0.664665	0.427081
AT4G26580	AT4G26580	RING/U-box superfamily protein,[Source:TAIR;Acc:AT4G26580]	0.658382	0.482882
AT4G27657	AT4G27657	unknown protein,[Source:TAIR;Acc:AT4G27657]	0.418046	0.46909
AT4G28040	AT4G28040	nodulin MtN21 /EamA-like transporter family protein,[Source:TAIR;Acc:AT4G28040]	0.556732	0.465544
AT4G28110	AT4G28110	AtMYB41 (myb domain protein 41); DNA binding	0.644497	0.144006
AT4G28410	AT4G28410	Tyrosine transaminase family protein,[Source:TAIR;Acc:AT4G28410]	0.545371	0.415631
AT4G28680	TYRDC	L-tyrosine decarboxylase,[Source:TAIR;Acc:AT4G28680]	0.649864	0.488674
AT4G29030	AT4G29030	Putative membrane lipoprotein,[Source:TAIR;Acc:AT4G29030]	0.477657	0.171974
AT4G29930	AT4G29930	basic helix-loop-helix (bHLH) DNA-binding superfamily protein,[Source:TAIR;Acc:AT4G29930]	0.443094	0.268726
AT4G30110	HMA2	heavy metal atpase 2,[Source:TAIR;Acc:AT4G30110]	1.67117	2.3018
AT4G30140	CDEF1	GDSL-like Lipase/Acylhydrolase superfamily protein,[Source:TAIR;Acc:AT4G30140]	0.515829	0.411568
AT4G30290	ATXTH19	xyloglucan endotransglucosylase/hydrolase 19,[Source:TAIR;Acc:AT4G30290]	1.7836	2.90804
AT4G30450	AT4G30450	glycine-rich protein,[Source:TAIR;Acc:AT4G30450]	0.660767	0.48332
AT4G31330	AT4G31330	Protein of unknown function, DUF599,[Source:TAIR;Acc:AT4G31330]	1.58202	2.71617
AT4G31800	WRKY18	WRKY DNA-binding protein 18,[Source:TAIR;Acc:AT4G31800]	3.21456	1.51684
AT4G31805	AT4G31805	WRKY family transcription factor,[Source:TAIR;Acc:AT4G31805]	0.324354	0.529597
AT4G32860	AT4G32860	unknown protein,[Source:TAIR;Acc:AT4G32860]	0.450605	0.309475
AT4G33720	AT4G33720	CAP (Cysteine-rich secretory proteins, Antigen 5, and Pathogenesis-related 1 protein) superfamily protein,[Source:TAIR;Acc:AT4G33720]	0.339405	0.0366355
AT4G33790	CER4	Jojoba acyl CoA reductase-related male sterility protein,[Source:TAIR;Acc:AT4G33790]	0.490845	0.312287
AT4G34320	AT4G34320	Protein of unknown function (DUF677),[Source:TAIR;Acc:AT4G34320]	4.09021	2.44682
AT4G35160	AT4G35160	O-methyltransferase family protein,[Source:TAIR;Acc:AT4G35160]	0.555541	0.243297
AT4G35720	AT4G35720	Arabidopsis protein of unknown function (DUF241),[Source:TAIR;Acc:AT4G35720]	1.9031	3.07811
AT4G35740	RecQl3	DEAD/DEAH box RNA helicase family protein,[Source:TAIR;Acc:AT4G35740]	2.02261	1.81236
AT4G36430	AT4G36430	Peroxidase superfamily protein,[Source:TAIR;Acc:AT4G36430]	2.82114	3.74643
AT4G36600	AT4G36600	Late embryogenesis abundant (LEA) protein,[Source:TAIR;Acc:AT4G36600]	0.230428	0
AT4G37010	CEN2	centrin 2,[Source:TAIR;Acc:AT4G37010]	0.437029	0.526669
AT4G37390	YDK1	Auxin-responsive GH3 family protein,[Source:TAIR;Acc:AT4G37390]	0.605362	0.35153
AT4G37400	CYP81F3	cytochrome P450, family 81, subfamily F, polypeptide 3,[Source:TAIR;Acc:AT4G37400]	0.659329	0.478922
AT4G37409	AT4G37409	unknown protein,[Source:TAIR;Acc:AT4G37409]	0.307637	0.237348
AT4G37409	AT4G37409	unknown protein,[Source:TAIR;Acc:AT4G37409]	0.307637	0.237348
AT4G38080	AT4G38080	hydroxyproline-rich glycoprotein family protein,[Source:TAIR;Acc:AT4G38080]	0.453414	0.349872
AT4G38390	RHS17	root hair specific 17,[Source:TAIR;Acc:AT4G38390]	0.283614	0.450481
AT4G38780	AT4G38780	Pre-mRNA-processing-splicing factor,[Source:TAIR;Acc:AT4G38780]	2.23209	2.22739
AT4G39675	AT4G39675	unknown protein,[Source:TAIR;Acc:AT4G39675]	0.401943	0.378822
AT4G39830	AT4G39830	Cupredoxin superfamily protein,[Source:TAIR;Acc:AT4G39830]	2.19326	1.7102
AT4G40065	AT4G40065	other RNA,[Source:TAIR;Acc:AT4G40065]	0.425389	0.627028
AT5G01010	AT5G01010	No description	0.437001	0.385328
AT5G01015	AT5G01015	unknown protein,[Source:TAIR;Acc:AT5G01015]	0.180327	0.077526
AT5G01020	AT5G01020	Protein kinase superfamily protein,[Source:TAIR;Acc:AT5G01020]	0.529166	0.452535
AT5G01050	AT5G01050	Laccase/Diphenol oxidase family protein,[Source:TAIR;Acc:AT5G01050]	0.607737	0.415312
AT5G01335	AT5G01335	transposable element gene,[Source:TAIR;Acc:AT5G01335]	1.77238	4.24416
AT5G01490	CAX4	cation exchanger 4,[Source:TAIR;Acc:AT5G01490]	0.425402	0.380076
AT5G02550	AT5G02550	unknown protein,[Source:TAIR;Acc:AT5G02550]	0.59355	0.454179
AT5G03160	ATP58IPK	homolog of mamallian P58IPK,[Source:TAIR;Acc:AT5G03160]	0.614714	0.301276
AT5G03495	AT5G03495	RNA-binding (RRM/RBD/RNP motifs) family protein,[Source:TAIR;Acc:AT5G03495]	1.66171	3.01006
AT5G03780	TRFL10	TRF-like 10,[Source:TAIR;Acc:AT5G03780]	3.70344	2.17735
AT5G03960	IQD12	IQ-domain 12,[Source:TAIR;Acc:AT5G03960]	0.437922	0.192387
AT5G05390	LAC12	laccase 12,[Source:TAIR;Acc:AT5G05390]	2.71779	2.56539
AT5G05420	AT5G05420	FKBP-like peptidyl-prolyl cis-trans isomerase family protein,[Source:TAIR;Acc:AT5G05420]	1.86096	3.16747
AT5G06090	ATGPAT7	glycerol-3-phosphate acyltransferase 7,[Source:TAIR;Acc:AT5G06090]	0.460872	0.397893
AT5G06200	AT5G06200	Uncharacterised protein family (UPF0497),[Source:TAIR;Acc:AT5G06200]	0.425402	0.295644
AT5G06300	AT5G06300	Putative lysine decarboxylase family protein,[Source:TAIR;Acc:AT5G06300]	0.558899	0.495359
AT5G06720	ATPA2	peroxidase 2,[Source:TAIR;Acc:AT5G06720]	5.80068	2.82163
AT5G06760	LEA4-5	Late Embryogenesis Abundant 4-5,[Source:TAIR;Acc:AT5G06760]	0.481082	0.207289
AT5G06870	PGIP2	polygalacturonase inhibiting protein 2,[Source:TAIR;Acc:AT5G06870]	2.07505	2.7865
AT5G07030	AT5G07030	Eukaryotic aspartyl protease family protein,[Source:TAIR;Acc:AT5G07030]	0.505651	0.378349
AT5G07130	LAC13	laccase 13,[Source:TAIR;Acc:AT5G07130]	0.64099	0.464953
AT5G07330	AT5G07330	unknown protein,[Source:TAIR;Acc:AT5G07330]	0.405158	0.146606
AT5G07475	AT5G07475	Cupredoxin superfamily protein,[Source:TAIR;Acc:AT5G07475]	0.583178	0.410431
AT5G07610	AT5G07610	F-box family protein,[Source:TAIR;Acc:AT5G07610]	3.63342	2.76743
AT5G07690	MYB29	myb domain protein 29,[Source:TAIR;Acc:AT5G07690]	0.629945	0.306648
AT5G08250	AT5G08250	Cytochrome P450 superfamily protein,[Source:TAIR;Acc:AT5G08250]	0.177258	0.513052
AT5G09220	AAP2	amino acid permease 2,[Source:TAIR;Acc:AT5G09220]	0.528101	0.410616
AT5G09520	AT5G09520	hydroxyproline-rich glycoprotein family protein,[Source:TAIR;Acc:AT5G09520]	0.501628	0.277052
AT5G09970	CYP78A7	cytochrome P450, family 78, subfamily A, polypeptide 7,[Source:TAIR;Acc:AT5G09970]	1.97496	2.56513
AT5G09978	PEP7	elicitor peptide 7 precursor,[Source:TAIR;Acc:AT5G09978]	0.483423	0.543221
AT5G10230	ANNAT7	annexin 7,[Source:TAIR;Acc:AT5G10230]	0.251882	0.218149
AT5G10380	RING1	RING/U-box superfamily protein,[Source:TAIR;Acc:AT5G10380]	1.66546	2.03477
AT5G10430	AGP4	arabinogalactan protein 4,[Source:TAIR;Acc:AT5G10430]	0.393531	0.325938
AT5G12020	HSP17,6II	17,6 kDa class II heat shock protein,[Source:TAIR;Acc:AT5G12020]	2.10725	4.14599
AT5G12030	AT-HSP17,6A	heat shock protein 17,6A,[Source:TAIR;Acc:AT5G12030]	4.0025	3.00395
AT5G12420	AT5G12420	O-acyltransferase (WSD1-like) family protein,[Source:TAIR;Acc:AT5G12420]	0.52999	0.328995
AT5G13580	AT5G13580	ABC-2 type transporter family protein,[Source:TAIR;Acc:AT5G13580]	0.435431	0.25464
AT5G13900	AT5G13900	Bifunctional inhibitor/lipid-transfer protein/seed storage 2S albumin superfamily protein,[Source:TAIR;Acc:AT5G13900]	0.391799	0.189207
AT5G14070	ROXY2	Thioredoxin superfamily protein,[Source:TAIR;Acc:AT5G14070]	0.457871	0.235135
AT5G14550	AT5G14550	Core-2/I-branching beta-1,6-N-acetylglucosaminyltransferase family protein,[Source:TAIR;Acc:AT5G14550]	1.5952	3.61151
AT5G14550	AT5G14550	Core-2/I-branching beta-1,6-N-acetylglucosaminyltransferase family protein,[Source:TAIR;Acc:AT5G14550]	2.32619	9.57778
AT5G14930	SAG101	senescence-associated gene 101,[Source:TAIR;Acc:AT5G14930]	3.14742	2.19275
AT5G15180	AT5G15180	Peroxidase superfamily protein,[Source:TAIR;Acc:AT5G15180]	0.445494	0.147997
AT5G15265	AT5G15265	unknown protein,[Source:TAIR;Acc:AT5G15265]	0.290054	0.513052
AT5G15290	AT5G15290	Uncharacterised protein family (UPF0497),[Source:TAIR;Acc:AT5G15290]	0.0483423	0.162019
AT5G15530	BCCP2	biotin carboxyl carrier protein 2,[Source:TAIR;Acc:AT5G15530]	0.392466	0.642724
AT5G16080	AtCXE17	carboxyesterase 17,[Source:TAIR;Acc:AT5G16080]	3.16864	3.07833
AT5G16490	RIC4	ROP-interactive CRIB motif-containing protein 4,[Source:TAIR;Acc:AT5G16490]	0.505105	0.473598
AT5G16530	PIN5	Auxin efflux carrier family protein,[Source:TAIR;Acc:AT5G16530]	0.354504	0.213745
AT5G16840	BPA1	binding partner of acd11 1,[Source:TAIR;Acc:AT5G16840]	45.5641	61.3087
AT5G16860	AT5G16860	Tetratricopeptide repeat (TPR)-like superfamily protein,[Source:TAIR;Acc:AT5G16860]	3.36995	12.8928
AT5G18860	AT5G18860	inosine-uridine preferring nucleoside hydrolase family protein,[Source:TAIR;Acc:AT5G18860]	0.524497	0.436533
AT5G18930	BUD2	Adenosylmethionine decarboxylase family protein,[Source:TAIR;Acc:AT5G18930]	0.341809	0.34203
AT5G19530	ACL5	S-adenosyl-L-methionine-dependent methyltransferases superfamily protein,[Source:TAIR;Acc:AT5G19530]	0.542156	0.423306
AT5G19890	AT5G19890	Peroxidase superfamily protein,[Source:TAIR;Acc:AT5G19890]	0.478598	0.205215
AT5G20630	GLP3	germin 3,[Source:TAIR;Acc:AT5G20630]	0.373236	0.51449
AT5G20850	ATRAD51	RAS associated with diabetes protein 51,[Source:TAIR;Acc:AT5G20850]	2.33967	2.13951
AT5G22940	F8H	FRA8 homolog,[Source:TAIR;Acc:AT5G22940]	0.372842	0.599439
AT5G23190	CYP86B1	cytochrome P450, family 86, subfamily B, polypeptide 1,[Source:TAIR;Acc:AT5G23190]	0.535669	0.359799
AT5G23840	AT5G23840	MD-2-related lipid recognition domain-containing protein,[Source:TAIR;Acc:AT5G23840]	0.141796	0.109937
AT5G23940	EMB3009	HXXXD-type acyl-transferase family protein,[Source:TAIR;Acc:AT5G23940]	0.453278	0.387538
AT5G23980	ATFRO4	ferric reduction oxidase 4,[Source:TAIR;Acc:AT5G23980]	0.510887	0.259474
AT5G23990	ATFRO5	ferric reduction oxidase 5,[Source:TAIR;Acc:AT5G23990]	0.282332	0.0461251
AT5G24280	GMI1	gamma-irradiation and mitomycin c induced 1,[Source:TAIR;Acc:AT5G24280]	2.13688	2.1927
AT5G24410	PGL4	6-phosphogluconolactonase 4,[Source:TAIR;Acc:AT5G24410]	0.42542	0.325363
AT5G24420	PGL5	6-phosphogluconolactonase 5,[Source:TAIR;Acc:AT5G24420]	0.488955	0.372626
AT5G24580	AT5G24580	Heavy metal transport/detoxification superfamily protein,[Source:TAIR;Acc:AT5G24580]	0.585724	0.423271
AT5G24910	CYP714A1	cytochrome P450, family 714, subfamily A, polypeptide 1,[Source:TAIR;Acc:AT5G24910]	0.319051	0.27629
AT5G25190	AT5G25190	Integrase-type DNA-binding superfamily protein,[Source:TAIR;Acc:AT5G25190]	2.89867	2.69378
AT5G25210	AT5G25210	unknown protein,[Source:TAIR;Acc:AT5G25210]	1.8814	2.3198
AT5G25440	AT5G25440	Protein kinase superfamily protein,[Source:TAIR;Acc:AT5G25440]	1.69749	2.41437
AT5G26190	AT5G26190	Cysteine/Histidine-rich C1 domain family protein,[Source:TAIR;Acc:AT5G26190]	3.89989	2.69374
AT5G35935	AT5G35935	transposable element gene,[Source:TAIR;Acc:AT5G35935]	18.7886	23.9675
AT5G35940	AT5G35940	Mannose-binding lectin superfamily protein,[Source:TAIR;Acc:AT5G35940]	0.415017	0.46639
AT5G36870	ATGSL09	glucan synthase-like 9,[Source:TAIR;Acc:AT5G36870]	0.389969	0.404254
AT5G38030	AT5G38030	MATE efflux family protein,[Source:TAIR;Acc:AT5G38030]	0.518101	0.477246
AT5G38565	AT5G38565	F-box/FBD-like domains containing protein,[Source:TAIR;Acc:AT5G38565]	2.12683	2.13119
AT5G38930	AT5G38930	RmlC-like cupins superfamily protein,[Source:TAIR;Acc:AT5G38930]	0.513442	0.0810096
AT5G38940	AT5G38940	RmlC-like cupins superfamily protein,[Source:TAIR;Acc:AT5G38940]	0.507286	0.375183
AT5G39160	AT5G39160	RmlC-like cupins superfamily protein,[Source:TAIR;Acc:AT5G39160]	0.631915	0.432896
AT5G39190	GLP2A	germin-like protein 2,[Source:TAIR;Acc:AT5G39190]	0.523552	0.447259
AT5G40020	AT5G40020	Pathogenesis-related thaumatin superfamily protein,[Source:TAIR;Acc:AT5G40020]	0.540734	0.449792
AT5G40840	SYN2	Rad21/Rec8-like family protein,[Source:TAIR;Acc:AT5G40840]	2.68402	2.82181
AT5G41040	AT5G41040	HXXXD-type acyl-transferase family protein,[Source:TAIR;Acc:AT5G41040]	0.607924	0.395244
AT5G42180	AT5G42180	Peroxidase superfamily protein,[Source:TAIR;Acc:AT5G42180]	0.548727	0.325562
AT5G42250	AT5G42250	Zinc-binding alcohol dehydrogenase family protein,[Source:TAIR;Acc:AT5G42250]	0.63668	0.400177
AT5G42450	AT5G42450	Pentatricopeptide repeat (PPR) superfamily protein,[Source:TAIR;Acc:AT5G42450]	2.12695	2.22317
AT5G42500	AT5G42500	Disease resistance-responsive (dirigent-like protein) family protein,[Source:TAIR;Acc:AT5G42500]	0.476768	0.250265
AT5G43980	PDLP1	plasmodesmata-located protein 1,[Source:TAIR;Acc:AT5G43980]	2.45929	2.2804
AT5G44005	AT5G44005	unknown protein,[Source:TAIR;Acc:AT5G44005]	2.70697	1.75034
AT5G44120	CRA1	RmlC-like cupins superfamily protein,[Source:TAIR;Acc:AT5G44120]	0.0651135	0.151749
AT5G44310	AT5G44310	Late embryogenesis abundant protein (LEA) family protein,[Source:TAIR;Acc:AT5G44310]	0.163615	0.307841
AT5G44350	AT5G44350	ethylene-responsive nuclear protein -related,[Source:TAIR;Acc:AT5G44350]	0.411694	0.152045
AT5G44480	DUR	NAD(P)-binding Rossmann-fold superfamily protein,[Source:TAIR;Acc:AT5G44480]	0.596322	0.46507
AT5G44550	AT5G44550	Uncharacterised protein family (UPF0497),[Source:TAIR;Acc:AT5G44550]	0.483771	0.43751
AT5G44568	AT5G44568	unknown protein,[Source:TAIR;Acc:AT5G44568]	3.40297	1.52258
AT5G44572	AT5G44572	unknown protein,[Source:TAIR;Acc:AT5G44572]	3.06145	2.19275
AT5G44610	MAP18	microtubule-associated protein 18,[Source:TAIR;Acc:AT5G44610]	0.431334	0.414617
AT5G45990	AT5G45990	crooked neck protein, putative / cell cycle protein, putative,[Source:TAIR;Acc:AT5G45990]	5.31729	6.67005
AT5G46050	ATPTR3	peptide transporter 3,[Source:TAIR;Acc:AT5G46050]	2.23331	2.17288
AT5G46330	FLS2	Leucine-rich receptor-like protein kinase family protein,[Source:TAIR;Acc:AT5G46330]	1.5952	3.04765
AT5G46700	TET1	Tetraspanin family protein,[Source:TAIR;Acc:AT5G46700]	3.23467	2.35254
AT5G46890	AT5G46890	Bifunctional inhibitor/lipid-transfer protein/seed storage 2S albumin superfamily protein,[Source:TAIR;Acc:AT5G46890]	0.118163	0.0184332
AT5G46900	AT5G46900	Bifunctional inhibitor/lipid-transfer protein/seed storage 2S albumin superfamily protein,[Source:TAIR;Acc:AT5G46900]	0.135696	0.0358915
AT5G47000	AT5G47000	Peroxidase superfamily protein,[Source:TAIR;Acc:AT5G47000]	4.07718	2.12555
AT5G47630	mtACP3	mitochondrial acyl carrier protein 3,[Source:TAIR;Acc:AT5G47630]	0.557092	0.410419
AT5G47980	AT5G47980	HXXXD-type acyl-transferase family protein,[Source:TAIR;Acc:AT5G47980]	0.531775	0.171017
AT5G48430	AT5G48430	Eukaryotic aspartyl protease family protein,[Source:TAIR;Acc:AT5G48430]	0.635753	0.342031
AT5G48570	ROF2	FKBP-type peptidyl-prolyl cis-trans isomerase family protein,[Source:TAIR;Acc:AT5G48570]	2.65142	1.70671
AT5G48720	XRI	x-ray induced transcript 1,[Source:TAIR;Acc:AT5G48720]	3.83846	2.54414
AT5G49350	AT5G49350	Glycine-rich protein family,[Source:TAIR;Acc:AT5G49350]	0.508617	0.403715
AT5G49520	WRKY48	WRKY DNA-binding protein 48,[Source:TAIR;Acc:AT5G49520]	4.41754	2.15652
AT5G50010	AT5G50010	sequence-specific DNA binding transcription factors;transcription regulators,[Source:TAIR;Acc:AT5G50010]	0.48481	0.422521
AT5G50010	AT5G50010	sequence-specific DNA binding transcription factors;transcription regulators,[Source:TAIR;Acc:AT5G50010]	0.48481	0.422521
AT5G50330	AT5G50330	Protein kinase superfamily protein,[Source:TAIR;Acc:AT5G50330]	1.55426	2.29649
AT5G50560	AT5G50560	Protein of unknown function (DUF 3339),[Source:TAIR;Acc:AT5G50560]	0.604693	0.378045
AT5G50740	AT5G50740	Heavy metal transport/detoxification superfamily protein,[Source:TAIR;Acc:AT5G50740]	0.444189	0.389465
AT5G50820	anac097	NAC domain containing protein 97,[Source:TAIR;Acc:AT5G50820]	0.612269	0.293188
AT5G50930	AT5G50930	Histone superfamily protein,[Source:TAIR;Acc:AT5G50930]	3.34259	1.74819
AT5G51720	AT5G51720	2 iron, 2 sulfur cluster binding,[Source:TAIR;Acc:AT5G51720]	0.305205	0.584746
AT5G51780	AT5G51780	basic helix-loop-helix (bHLH) DNA-binding superfamily protein,[Source:TAIR;Acc:AT5G51780]	0.395734	0.221871
AT5G51920	AT5G51920	Pyridoxal phosphate (PLP)-dependent transferases superfamily protein,[Source:TAIR;Acc:AT5G51920]	4.20558	1.6181
AT5G52070	AT5G52070	Agenet domain-containing protein,[Source:TAIR;Acc:AT5G52070]	0.488452	0.536366
AT5G53230	AT5G53230	Protein of unknown function (DUF295),[Source:TAIR;Acc:AT5G53230]	3.6557	2.98211
AT5G53240	AT5G53240	Protein of unknown function (DUF295),[Source:TAIR;Acc:AT5G53240]	1.66153	3.24927
AT5G53250	AGP22	arabinogalactan protein 22,[Source:TAIR;Acc:AT5G53250]	0.284572	0.174657
AT5G53420	AT5G53420	CCT motif family protein,[Source:TAIR;Acc:AT5G53420]	2.23991	1.78616
AT5G53730	AT5G53730	Late embryogenesis abundant (LEA) hydroxyproline-rich glycoprotein family,[Source:TAIR;Acc:AT5G53730]	3.07243	3.16371
AT5G53740	AT5G53740	unknown protein,[Source:TAIR;Acc:AT5G53740]	1.97496	3.09385
AT5G53810	AT5G53810	O-methyltransferase family protein,[Source:TAIR;Acc:AT5G53810]	3.03869	2.43727
AT5G53902	U3B	U3BsnoRNA,[Source:TAIR;Acc:AT5G53902]	2.0559	2.1367
AT5G53902	U3B	U3BsnoRNA,[Source:TAIR;Acc:AT5G53902]	2.20278	2.13768
AT5G54070	AT-HSFA9	heat shock transcription factor A9,[Source:TAIR;Acc:AT5G54070]	1.63051	2.44375
AT5G54070	AT-HSFA9	heat shock transcription factor A9,[Source:TAIR;Acc:AT5G54070]	1.63051	2.44375
AT5G55250	IAMT1	IAA carboxylmethyltransferase 1,[Source:TAIR;Acc:AT5G55250]	0.645673	0.212724
AT5G55490	ATGEX1	gamete expressed protein 1,[Source:TAIR;Acc:AT5G55490]	4.70941	1.61243
AT5G56080	ATNAS2	nicotianamine synthase 2,[Source:TAIR;Acc:AT5G56080]	2.40194	1.51584
AT5G56370	AT5G56370	F-box/RNI-like/FBD-like domains-containing protein,[Source:TAIR;Acc:AT5G56370]	1.57102	2.68108
AT5G56540	AGP14	arabinogalactan protein 14,[Source:TAIR;Acc:AT5G56540]	0.456439	0.13827
AT5G56810	AT5G56810	F-box/RNI-like/FBD-like domains-containing protein,[Source:TAIR;Acc:AT5G56810]	1.77246	2.49681
AT5G57240	ORP4C	OSBP(oxysterol binding protein)-related protein 4C,[Source:TAIR;Acc:AT5G57240]	2.84882	2.09343
AT5G57340	AT5G57340	unknown protein,[Source:TAIR;Acc:AT5G57340]	4.60825	2.19881
AT5G58010	LRL3	LJRHL1-like 3,[Source:TAIR;Acc:AT5G58010]	0.646399	0.396757
AT5G58610	AT5G58610	PHD finger transcription factor, putative,[Source:TAIR;Acc:AT5G58610]	1.86821	2.66788
AT5G58860	CYP86A1	cytochrome P450, family 86, subfamily A, polypeptide 1,[Source:TAIR;Acc:AT5G58860]	0.645675	0.419244
AT5G59070	AT5G59070	UDP-Glycosyltransferase superfamily protein,[Source:TAIR;Acc:AT5G59070]	3.89989	2.2721
AT5G59090	ATSBT4,12	subtilase 4,12,[Source:TAIR;Acc:AT5G59090]	0.440979	0.276399
AT5G59390	AT5G59390	XH/XS domain-containing protein,[Source:TAIR;Acc:AT5G59390]	2.17314	1.96901
AT5G59680	AT5G59680	Leucine-rich repeat protein kinase family protein,[Source:TAIR;Acc:AT5G59680]	0.354471	0.40308
AT5G60490	FLA12	FASCICLIN-like arabinogalactan-protein 12,[Source:TAIR;Acc:AT5G60490]	0.628416	0.41977
AT5G60610	AT5G60610	F-box/RNI-like superfamily protein,[Source:TAIR;Acc:AT5G60610]	5.3172	5.59677
AT5G60660	PIP2F	plasma membrane intrinsic protein 2;4,[Source:TAIR;Acc:AT5G60660]	0.343324	0.204291
AT5G60890	ATMYB34	myb domain protein 34,[Source:TAIR;Acc:AT5G60890]	0.482806	0.511068
AT5G61070	HDA18	histone deacetylase of the RPD3/HDA1 superfamily 18,[Source:TAIR;Acc:AT5G61070]	4.44123	3.38592
AT5G61740	ATATH14	ABC2 homolog 14,[Source:TAIR;Acc:AT5G61740]	14.6729	7.18213
AT5G62340	AT5G62340	Plant invertase/pectin methylesterase inhibitor superfamily protein,[Source:TAIR;Acc:AT5G62340]	0.232649	0.57716
AT5G63090	LOB	Lateral organ boundaries (LOB) domain family protein,[Source:TAIR;Acc:AT5G63090]	2.81505	2.30348
AT5G63180	AT5G63180	Pectin lyase-like superfamily protein,[Source:TAIR;Acc:AT5G63180]	2.01156	1.54021
AT5G63750	ATARI13	RING/U-box superfamily protein,[Source:TAIR;Acc:AT5G63750]	3.07231	5.64234
AT5G64060	anac103	NAC domain containing protein 103,[Source:TAIR;Acc:AT5G64060]	3.59174	3.9652
AT5G64750	ABR1	Integrase-type DNA-binding superfamily protein,[Source:TAIR;Acc:AT5G64750]	1.51126	2.66763
AT5G64910	AT5G64910	unknown protein,[Source:TAIR;Acc:AT5G64910]	3.79311	7.31158
AT5G65140	AT5G65140	Haloacid dehalogenase-like hydrolase (HAD) superfamily protein,[Source:TAIR;Acc:AT5G65140]	0.524831	0.405048
AT5G65320	AT5G65320	basic helix-loop-helix (bHLH) DNA-binding superfamily protein,[Source:TAIR;Acc:AT5G65320]	4.60903	1.65759
AT5G65790	ATMYB68	myb domain protein 68,[Source:TAIR;Acc:AT5G65790]	0.549163	0.390079
AT5G66130	ATRAD17	RADIATION SENSITIVE 17,[Source:TAIR;Acc:AT5G66130]	2.08604	2.03852
AT5G66390	AT5G66390	Peroxidase superfamily protein,[Source:TAIR;Acc:AT5G66390]	0.45016	0.433
AT5G66400	RAB18	Dehydrin family protein,[Source:TAIR;Acc:AT5G66400]	0.157393	0.329127
AT5G66800	AT5G66800	unknown protein,[Source:TAIR;Acc:AT5G66800]	0.202579	0.513052
AT5G67430	AT5G67430	Acyl-CoA N-acyltransferases (NAT) superfamily protein,[Source:TAIR;Acc:AT5G67430]	0.603553	0.336419
AT5G67620	AT5G67620	unknown protein,[Source:TAIR;Acc:AT5G67620]	0.498533	0.401513
ATCG00290	TRNS,2	tRNA-Ser,[Source:TAIR;Acc:ATCG00290]	1.50138	2.2721
ATCG00560	PSBL	photosystem II reaction center protein L,[Source:TAIR;Acc:ATCG00560]	1.79446	2.49199
ATCG00960	RRN4,5S,1	Chloroplast-encoded 4,5S ribosomal RNA, which is a constituent of the 50S large subunit of plastidic ribosome,,[Source:TAIR;Acc:ATCG00960]	1.54685	2.45589
C0LGP2	AT3G46330	Probable LRR receptor-like serine/threonine-protein kinase MEE39 Precursor (EC 2,7,11,1)(Protein MATERNAL EFFECT EMBRYO ARREST 39) [Source:UniProtKB/Swiss-Prot;Acc:C0LGP2]	0.29912	0.513052
NP_001119353	AT5G41761	unknown protein [Source:RefSeq peptide;Acc:NP_001119353]	2.82573	4.36086
NP_001119400	AT5G49110	unknown protein [Source:RefSeq peptide;Acc:NP_001119400]	2.4869	1.9733
NP_174326	AT1G30370	lipase class 3 family protein [Source:RefSeq peptide;Acc:NP_174326]	0.602679	0.0366687
NP_178020	AT1G78990	transferase family protein [Source:RefSeq peptide;Acc:NP_178020]	0.384377	0.267078
NP_180789	AT2G32300	UCC1 (UCLACYANIN 1); copper ion binding / electron carrier [Source:RefSeq peptide;Acc:NP_180789]	0.581997	0.478849
NP_180997	AT2G34500	CYP710A1 (cytochrome P450, family 710, subfamily A, polypeptide 1); C-22 sterol desaturase/ oxygen binding [Source:RefSeq peptide;Acc:NP_180997]	0.404263	0.523515
NP_181924	AT2G43960	SWAP (Suppressor-of-White-APricot)/surp domain-containing protein [Source:RefSeq peptide;Acc:NP_181924]	2.33959	7.52676
NP_187437	AT3G07800	thymidine kinase, putative [Source:RefSeq peptide;Acc:NP_187437]	2.72245	2.07704
NP_188752	AT3G21150	zinc finger (B-box type) family protein [Source:RefSeq peptide;Acc:NP_188752]	0.5194	0.407427
NP_191130	AT3G55710	UDP-glucoronosyl/UDP-glucosyl transferase family protein [Source:RefSeq peptide;Acc:NP_191130]	0.435056	0.125646
NP_191496	AT3G59370	unknown protein [Source:RefSeq peptide;Acc:NP_191496]	0.182317	0.0732931
NP_192447	AT4G05380	AAA-type ATPase family protein [Source:RefSeq peptide;Acc:NP_192447]	5.74148	8.21148
NP_192524	AT4G07820	pathogenesis-related protein, putative [Source:RefSeq peptide;Acc:NP_192524]	0.403385	0.393504
NP_192992	AT4G12550	AIR1; lipid binding [Source:RefSeq peptide;Acc:NP_192992]	0.156167	0.0805847
NP_193880	AT4G21490	NDB3; NADH dehydrogenase [Source:RefSeq peptide;Acc:NP_193880]	2.59206	2.05221
NP_194012	AT4G22810	DNA-binding protein-related [Source:RefSeq peptide;Acc:NP_194012]	0.657682	0.355984
NP_194623	AT4G28940	catalytic [Source:RefSeq peptide;Acc:NP_194623]	0.393861	0.452684
NP_195087	AT4G33610	glycine-rich protein [Source:RefSeq peptide;Acc:NP_195087]	0.184136	0.139821
NP_195338	AT4G36150	disease resistance protein (TIR-NBS-LRR class), putative [Source:RefSeq peptide;Acc:NP_195338]	2.05754	1.53921
NP_195453	AT4G37370	CYP81D8; electron carrier/ heme binding / iron ion binding / monooxygenase/ oxygen binding [Source:RefSeq peptide;Acc:NP_195453]	2.22585	2.29039
NP_195660	AT4G39500	CYP96A11; electron carrier/ heme binding / iron ion binding / monooxygenase/ oxygen binding [Source:RefSeq peptide;Acc:NP_195660]	4.52007	2.22317
NP_195884	AT5G02640	unknown protein [Source:RefSeq peptide;Acc:NP_195884]	0.483423	0.307841
NP_196702	AT5G11410	protein kinase family protein [Source:RefSeq peptide;Acc:NP_196702]	7.33253	4.14712
NP_196707	AT5G11460	senescence-associated protein-related [Source:RefSeq peptide;Acc:NP_196707]	1.83618	2.3045
NP_197064	AT5G15600	SP1L4 (SPIRAL1-LIKE4) [Source:RefSeq peptide;Acc:NP_197064]	0.595533	0.313997
NP_197999	AT5G26270	unknown protein [Source:RefSeq peptide;Acc:NP_197999]	0.651165	0.463827
NP_198398	AT5G35480	unknown protein [Source:RefSeq peptide;Acc:NP_198398]	0.55488	0.433267
NP_198777	AT5G39610	ATNAC6 (ARABIDOPSIS NAC DOMAIN CONTAINING PROTEIN 6); protein heterodimerization/ protein homodimerization/ transcription factor [Source:RefSeq peptide;Acc:NP_198777]	2.69191	1.98965
NP_199066	AT5G42510	disease resistance-responsive family protein [Source:RefSeq peptide;Acc:NP_199066]	0.48031	0.314465
NP_199165	AT5G43520	DC1 domain-containing protein [Source:RefSeq peptide;Acc:NP_199165]	0.514564	0.23549
NP_199606	AT5G47950	transferase family protein [Source:RefSeq peptide;Acc:NP_199606]	0.520421	0.367847
NP_200833	AT5G60250	zinc finger (C3HC4-type RING finger) family protein [Source:RefSeq peptide;Acc:NP_200833]	6.28973	3.6165
NP_565145	AT1G76960	unknown protein [Source:RefSeq peptide;Acc:NP_565145]	3.68117	5.1325
NP_567392	AT4G12510	protease inhibitor/seed storage/lipid transfer protein (LTP) family protein [Source:RefSeq peptide;Acc:NP_567392]	0.311877	0.0846864
NP_567392	AT4G12520	protease inhibitor/seed storage/lipid transfer protein (LTP) family protein [Source:RefSeq peptide;Acc:NP_567392]	0.363696	0.111907
NP_567449	AT4G14930	acid phosphatase survival protein SurE, putative [Source:RefSeq peptide;Acc:NP_567449]	0.630862	0.439764
NP_849366	AT4G12545	protease inhibitor/seed storage/lipid transfer protein (LTP) family protein [Source:RefSeq peptide;Acc:NP_849366]	0.413089	0.229292
NP_850758	AT5G03545	unknown protein [Source:RefSeq peptide;Acc:NP_850758]	0.525616	0.281422
NR_023038	AT4G31877	(MIR156C) otherRNA [Source:RefSeq DNA;Acc:NR_023038]	2.57255	4.01768
O80338	AT5G47220	Ethylene-responsive transcription factor 2 (AtERF2)(Ethylene-responsive element-binding factor 2)(EREBP-2) [Source:UniProtKB/Swiss-Prot;Acc:O80338]	1.74226	5.13041
P30183	AT4G37490	Cyclin-B1-1 (G2/mitotic-specific cyclin-B1-1)(CycB1;1)(Cyc1-At) [Source:UniProtKB/Swiss-Prot;Acc:P30183]	2.45841	1.6069
Q39165	AT5G40420	Oleosin 21,2 kDa (Oleosin type 2) [Source:UniProtKB/Swiss-Prot;Acc:Q39165]	0.412336	0.107215
Q3E8R5	AT5G33355	Defensin-like protein 207 Precursor [Source:UniProtKB/Swiss-Prot;Acc:Q3E8R5]	0.240147	0.377229
Q84R27	AT3G18960	B3 domain-containing protein At3g18960 [Source:UniProtKB/Swiss-Prot;Acc:Q84R27]	0.645043	0.429535
Q8LD23	AT1G20120	GDSL esterase/lipase At1g20120 Precursor (EC 3,1,1,-)(Extracellular lipase At1g20120) [Source:UniProtKB/Swiss-Prot;Acc:Q8LD23]	4.60837	1.79553
Q8LPF3	AT5G47500	Probable pectinesterase 68 Precursor (PE 68)(EC 3,1,1,11)(Pectin methylesterase 68)(AtPME68) [Source:UniProtKB/Swiss-Prot;Acc:Q8LPF3]	0.275429	0.46539
Q9CA68	AT1G74460	GDSL esterase/lipase At1g74460 Precursor (EC 3,1,1,-)(Extracellular lipase At1g74460) [Source:UniProtKB/Swiss-Prot;Acc:Q9CA68]	0.440058	0.330629
Q9FGL2	AT5G47450	Aquaporin TIP2-3 (Tonoplast intrinsic protein 2-3)(AtTIP2;3) [Source:UniProtKB/Swiss-Prot;Acc:Q9FGL2]	0.151922	0.0632659
Q9FHA7	AT5G67060	Transcription factor HEC1 (Protein HECATE 1)(Transcription factor EN 118)(bHLH transcription factor bHLH088)(Basic helix-loop-helix protein 88)(bHLH 88)(AtbHLH88) [Source:UniProtKB/Swiss-Prot;Acc:Q9FHA7]	3.14942	1.66912
Q9FIF5	AT5G59220	Probable protein phosphatase 2C 78 (AtPP2C78)(EC 3,1,3,16) [Source:UniProtKB/Swiss-Prot;Acc:Q9FIF5]	0.527473	0.258752
Q9FLX5	AT5G52860	ABC transporter G family member 8 (ABC transporter ABCG,8)(AtABCG8)(Probable white-brown complex homolog protein 8)(AtWBC8) [Source:UniProtKB/Swiss-Prot;Acc:Q9FLX5]	0.38355	0.342035
Q9LZX4	AT3G60900	Fasciclin-like arabinogalactan protein 10 Precursor [Source:UniProtKB/Swiss-Prot;Acc:Q9LZX4]	0.496287	0.370555
Q9STQ3	AT4G26320	Arabinogalactan peptide 13 Precursor (AG-peptide 13) [Source:UniProtKB/Swiss-Prot;Acc:Q9STQ3]	0.35451	0.107072
Q9SUP0	AT4G20390	UPF0497 membrane protein At4g20390 [Source:UniProtKB/Swiss-Prot;Acc:Q9SUP0]	0.475157	0.244475
Q9ZT17	AT4G40090	Classical arabinogalactan protein 3 Precursor [Source:UniProtKB/Swiss-Prot;Acc:Q9ZT17]	0.61668	0.30927
Q9ZVF2	AT2G01530	MLP-like protein 329 [Source:UniProtKB/Swiss-Prot;Acc:Q9ZVF2]	0.475576	0.447165
Q9ZVF3	AT2G01520	MLP-like protein 328 [Source:UniProtKB/Swiss-Prot;Acc:Q9ZVF3]	0.0922973	0.103215
