# Supplementary material for: Responses to Telomere Erosion in Plants
Source: PLoS One. 2014 Jan 21;9(1):e86220. doi: 10.1371/journal.pone.0086220 (PMC3897657; doi:10.1371/journal.pone.0086220)
Supplement: Table S3 — Lists of “Telomere damage” and “telomerase” genes. (XLSX) [file pone.0086220.s004.xlsx]

## Sheet: intro
	Supplemental Table 2. List of “Telomere damage” genes.
	Supplemental Table 3. List of “Absence of telomerase” genes.
	Supplemental Table 4. List of “stress” genes.
	Supplemental Table 5. List of “DNA repair and recombination” genes.
	Supplemental Table 6. List of “Cell cycle” genes.
	Supplemental Table 7. List of “PCD- Senescence” genes.
	Supplemental Table 8. List of “mitochondrial” genes.

## Sheet: supl table 3 - Telomere damage
locus	Feature	Description	G7/wt set1	G7/wt set2
AT1G01010	ANAC001	NAC domain containing protein 1,[Source:TAIR;Acc:AT1G01010]	-3.04938	-4
AT1G01225	AT1G01225	NC domain-containing protein-related,[Source:TAIR;Acc:AT1G01225]	-3.14286	-2.14286
AT1G01390	AT1G01390	UDP-Glycosyltransferase superfamily protein,[Source:TAIR;Acc:AT1G01390]	-1.88636	-4.06667
AT1G02650	AT1G02650	Tetratricopeptide repeat (TPR)-like superfamily protein,[Source:TAIR;Acc:AT1G02650]	3.94737	2.2963
AT1G02800	ATCEL2	cellulase 2,[Source:TAIR;Acc:AT1G02800]	-3.83333	-4
AT1G02900	RALFL1	rapid alkalinization factor 1,[Source:TAIR;Acc:AT1G02900]	-1.61321	-2.37629
AT1G03106	AT1G03106	unknown protein,[Source:TAIR;Acc:AT1G03106]	-3	-3.33333
AT1G04560	AT1G04560	AWPM-19-like family protein,[Source:TAIR;Acc:AT1G04560]	-12.8	-11
AT1G05260	RCI3	Peroxidase superfamily protein,[Source:TAIR;Acc:AT1G05260]	-1.86124	-2.77064
AT1G05660	AT1G05660	Pectin lyase-like superfamily protein,[Source:TAIR;Acc:AT1G05660]	-2.07692	-4.61538
AT1G06520	ATGPAT1	glycerol-3-phosphate acyltransferase 1,[Source:TAIR;Acc:AT1G06520]	4.13333	2.375
AT1G06830	AT1G06830	Glutaredoxin family protein,[Source:TAIR;Acc:AT1G06830]	-3.47619	-3.25926
AT1G07740	AT1G07740	Tetratricopeptide repeat (TPR)-like superfamily protein,[Source:TAIR;Acc:AT1G07740]	-2.01923	-2.05405
AT1G08340	AT1G08340	Rho GTPase activating protein with PAK-box/P21-Rho-binding domain,[Source:TAIR;Acc:AT1G08340]	-2.03279	-2.73684
AT1G08500	ENODL18	early nodulin-like protein 18,[Source:TAIR;Acc:AT1G08500]	-2.26667	-2.68421
AT1G09080	BIP3	Heat shock protein 70 (Hsp 70) family protein,[Source:TAIR;Acc:AT1G09080]	3.56667	2.91667
AT1G09540	MYB61	myb domain protein 61,[Source:TAIR;Acc:AT1G09540]	-2.08333	-2.91667
AT1G09850	XBCP3	xylem bark cysteine peptidase 3,[Source:TAIR;Acc:AT1G09850]	1.69231	3.57143
AT1G11740	AT1G11740	ankyrin repeat family protein,[Source:TAIR;Acc:AT1G11740]	-5.2	-5
AT1G12080	AT1G12080	Vacuolar calcium-binding protein-related,[Source:TAIR;Acc:AT1G12080]	-2.67556	-2.26042
AT1G13430	ATST4C	sulfotransferase 4C,[Source:TAIR;Acc:AT1G13430]	-2	-7
AT1G14540	AT1G14540	Peroxidase superfamily protein,[Source:TAIR;Acc:AT1G14540]	-1.81481	-2.27778
AT1G14780	AT1G14780	MAC/Perforin domain-containing protein,[Source:TAIR;Acc:AT1G14780]	3.05714	2.52174
AT1G15330	AT1G15330	Cystathionine beta-synthase (CBS) protein,[Source:TAIR;Acc:AT1G15330]	-4.85714	-6
AT1G15405	AT1G15405	other RNA,[Source:TAIR;Acc:AT1G15405]	1.47692	3.85714
AT1G16410	CYP79F1	cytochrome p450 79f1,[Source:TAIR;Acc:AT1G16410]	-1.70066	-3.54369
AT1G16510	AT1G16510	SAUR-like auxin-responsive protein family,[Source:TAIR;Acc:AT1G16510]	2.425	2.47059
AT1G17460	TRFL3	TRF-like 3,[Source:TAIR;Acc:AT1G17460]	1.94444	2.32143
AT1G17830	AT1G17830	Protein of unknown function (DUF789),[Source:TAIR;Acc:AT1G17830]	2.05495	1.66667
AT1G18140	LAC1	laccase 1,[Source:TAIR;Acc:AT1G18140]	-2.71429	-2
AT1G19380	AT1G19380	Protein of unknown function (DUF1195),[Source:TAIR;Acc:AT1G19380]	1.95349	1.61728
AT1G19610	LCR78	Arabidopsis defensin-like protein,[Source:TAIR;Acc:AT1G19610]	1.99359	3.72727
AT1G19900	AT1G19900	glyoxal oxidase-related protein,[Source:TAIR;Acc:AT1G19900]	-3.32	-6.06122
AT1G20120	AT1G20120	GDSL esterase/lipase At1g20120 Precursor (EC 3,1,1,-)(Extracellular lipase At1g20120) [Source:UniProtKB/Swiss-Prot;Acc:Q8LD23]	4.33333	1.75
AT1G20350	ATTIM17-1	translocase inner membrane subunit 17-1,[Source:TAIR;Acc:AT1G20350]	2.19355	3.08065
AT1G20440	COR47	cold-regulated 47,[Source:TAIR;Acc:AT1G20440]	-1.76805	-2.39082
AT1G20620	CAT3	catalase 3,[Source:TAIR;Acc:AT1G20620]	2.00975	1.71287
AT1G22030	AT1G22030	No description	-3.10345	-1.7619
AT1G23340	AT1G23340	Protein of Unknown Function (DUF239),[Source:TAIR;Acc:AT1G23340]	-3.8	-2.45
AT1G24130	AT1G24130	Transducin/WD40 repeat-like superfamily protein,[Source:TAIR;Acc:AT1G24130]	-2.5	-18
AT1G25510	AT1G25510	Eukaryotic aspartyl protease family protein,[Source:TAIR;Acc:AT1G25510]	-2.14286	-2.66667
AT1G25560	TEM1	AP2/B3 transcription factor family protein,[Source:TAIR;Acc:AT1G25560]	3.49611	1.81375
AT1G27660	AT1G27660	basic helix-loop-helix (bHLH) DNA-binding superfamily protein,[Source:TAIR;Acc:AT1G27660]	-1.68	-2.66667
AT1G27710	AT1G27710	Glycine-rich protein family,[Source:TAIR;Acc:AT1G27710]	2.78571	1.81818
AT1G27760	SAT32	interferon-related developmental regulator family protein / IFRD protein family,[Source:TAIR;Acc:AT1G27760]	3.68534	3.76667
AT1G28710	AT1G28710	Nucleotide-diphospho-sugar transferase family protein,[Source:TAIR;Acc:AT1G28710]	-2.77922	-1.78431
AT1G30080	AT1G30080	Glycosyl hydrolase superfamily protein,[Source:TAIR;Acc:AT1G30080]	-2.22727	-1.83333
AT1G30170	AT1G30170	Protein of unknown function (DUF295),[Source:TAIR;Acc:AT1G30170]	4.61538	2.31579
AT1G30370	AT1G30370	lipase class 3 family protein [Source:RefSeq peptide;Acc:NP_174326]	-1.76471	-28
AT1G30473	AT1G30473	Heavy metal transport/detoxification superfamily protein,[Source:TAIR;Acc:AT1G30473]	2.08333	2.41176
AT1G30475	AT1G30475	No description	2.1	1.85
AT1G30750	AT1G30750	unknown protein,[Source:TAIR;Acc:AT1G30750]	-2.4	-2.28125
AT1G30840	PUP4	purine permease 4,[Source:TAIR;Acc:AT1G30840]	-2.36986	-5.33333
AT1G32450	NRT1,5	nitrate transporter 1,5,[Source:TAIR;Acc:AT1G32450]	-2.12245	-7.38136
AT1G32583	AT1G32583	No description	2.91667	5.24138
AT1G33170	AT1G33170	S-adenosyl-L-methionine-dependent methyltransferases superfamily protein,[Source:TAIR;Acc:AT1G33170]	-1.97619	-7.10811
AT1G33790	AT1G33790	jacalin lectin family protein,[Source:TAIR;Acc:AT1G33790]	2.59322	1.6799
AT1G34180	anac016	NAC domain containing protein 16,[Source:TAIR;Acc:AT1G34180]	2.83333	2.02703
AT1G36180	ACC2	acetyl-CoA carboxylase 2,[Source:TAIR;Acc:AT1G36180]	4.20949	2.42
AT1G49450	AT1G49450	Transducin/WD40 repeat-like superfamily protein,[Source:TAIR;Acc:AT1G49450]	-3.92308	-11.875
AT1G49700	AT1G49700	Plant protein 1589 of unknown function,[Source:TAIR;Acc:AT1G49700]	2.06667	2.04138
AT1G49920	AT1G49920	MuDR family transposase,[Source:TAIR;Acc:AT1G49920]	1.55556	3.28571
AT1G52690	AT1G52690	Late embryogenesis abundant protein (LEA) family protein,[Source:TAIR;Acc:AT1G52690]	-1.80435	-10.5556
AT1G52750	AT1G52750	alpha/beta-Hydrolases superfamily protein	-1.67273	-2.87121
AT1G53540	AT1G53540	HSP20-like chaperones superfamily protein,[Source:TAIR;Acc:AT1G53540]	2.69231	6.26087
AT1G54540	AT1G54540	Late embryogenesis abundant (LEA) hydroxyproline-rich glycoprotein family,[Source:TAIR;Acc:AT1G54540]	-2	-3.39474
AT1G54870	AT1G54870	NAD(P)-binding Rossmann-fold superfamily protein,[Source:TAIR;Acc:AT1G54870]	-14	-5.33333
AT1G55990	AT1G55990	glycine-rich protein,[Source:TAIR;Acc:AT1G55990]	-3.82609	-7.47761
AT1G56150	AT1G56150	SAUR-like auxin-responsive protein family,[Source:TAIR;Acc:AT1G56150]	3.3	1.61905
AT1G56600	AtGolS2	galactinol synthase 2,[Source:TAIR;Acc:AT1G56600]	-2.23077	-3.4
AT1G58070	AT1G58070	unknown protein,[Source:TAIR;Acc:AT1G58070]	-2.1791	-2.06383
AT1G60030	ATNAT7	nucleobase-ascorbate transporter 7,[Source:TAIR;Acc:AT1G60030]	3	2.31579
AT1G60060	AT1G60060	Serine/threonine-protein kinase WNK (With No Lysine)-related,[Source:TAIR;Acc:AT1G60060]	2.60976	1.58
AT1G61255	AT1G61255	No description	2.08571	1.85714
AT1G62320	AT1G62320	ERD (early-responsive to dehydration stress) family protein,[Source:TAIR;Acc:AT1G62320]	-1.75	-3.58333
AT1G62360	STM	KNOX/ELK homeobox transcription factor,[Source:TAIR;Acc:AT1G62360]	2.74	1.56098
AT1G62500	AT1G62500	Bifunctional inhibitor/lipid-transfer protein/seed storage 2S albumin superfamily protein,[Source:TAIR;Acc:AT1G62500]	-3.12012	-9.1
AT1G62560	FMO GS-OX3	flavin-monooxygenase glucosinolate S-oxygenase 3,[Source:TAIR;Acc:AT1G62560]	-1.77273	-2.72973
AT1G62570	FMO GS-OX4	flavin-monooxygenase glucosinolate S-oxygenase 4,[Source:TAIR;Acc:AT1G62570]	-1.88176	-2.24623
AT1G63750	AT1G63750	Disease resistance protein (TIR-NBS-LRR class) family,[Source:TAIR;Acc:AT1G63750]	2.64912	1.84647
AT1G64590	AT1G64590	NAD(P)-binding Rossmann-fold superfamily protein,[Source:TAIR;Acc:AT1G64590]	-5.08333	-14.6364
AT1G65500	AT1G65500	unknown protein,[Source:TAIR;Acc:AT1G65500]	2.875	3
AT1G65860	FMO GS-OX1	flavin-monooxygenase glucosinolate S-oxygenase 1,[Source:TAIR;Acc:AT1G65860]	-1.89011	-2.88889
AT1G66040	VIM4	Zinc finger (C3HC4-type RING finger) family protein,[Source:TAIR;Acc:AT1G66040]	2.19048	1.52
AT1G66280	BGLU22	Glycosyl hydrolase superfamily protein,[Source:TAIR;Acc:AT1G66280]	-1.77778	-2.86301
AT1G69080	AT1G69080	Adenine nucleotide alpha hydrolases-like superfamily protein,[Source:TAIR;Acc:AT1G69080]	-3.5	-3.83333
AT1G70170	MMP	matrix metalloproteinase,[Source:TAIR;Acc:AT1G70170]	-3.6	-5.07692
AT1G70260	AT1G70260	nodulin MtN21 /EamA-like transporter family protein,[Source:TAIR;Acc:AT1G70260]	14	1.75
AT1G70430	AT1G70430	Protein kinase superfamily protein,[Source:TAIR;Acc:AT1G70430]	5.1	1.75556
AT1G70850	MLP34	MLP-like protein 34,[Source:TAIR;Acc:AT1G70850]	-2.73398	-2.59571
AT1G70890	MLP43	MLP-like protein 43,[Source:TAIR;Acc:AT1G70890]	2.16914	1.51442
AT1G70990	AT1G70990	proline-rich family protein,[Source:TAIR;Acc:AT1G70990]	-2.08333	-2.27273
AT1G71030	ATMYBL2	MYB-like 2,[Source:TAIR;Acc:AT1G71030]	2.62745	2.34437
AT1G71740	AT1G71740	unknown protein,[Source:TAIR;Acc:AT1G71740]	-3.46667	-2.78947
AT1G72230	AT1G72230	Cupredoxin superfamily protein,[Source:TAIR;Acc:AT1G72230]	-1.7561	-2.46809
AT1G72520	AT1G72520	PLAT/LH2 domain-containing lipoxygenase family protein,[Source:TAIR;Acc:AT1G72520]	4.07143	1.56098
AT1G73330	ATDR4	drought-repressed 4,[Source:TAIR;Acc:AT1G73330]	-5.20202	-10.9556
AT1G74430	MYB95	myb domain protein 95,[Source:TAIR;Acc:AT1G74430]	2	1.46341
AT1G74460	AT1G74460	GDSL esterase/lipase At1g74460 Precursor (EC 3,1,1,-)(Extracellular lipase At1g74460) [Source:UniProtKB/Swiss-Prot;Acc:Q9CA68]	-2.41667	-3.10345
AT1G76250	AT1G76250	unknown protein,[Source:TAIR;Acc:AT1G76250]	-2.33333	-1.91304
AT1G78120	AT1G78120	Tetratricopeptide repeat (TPR)-like superfamily protein,[Source:TAIR;Acc:AT1G78120]	-1.71642	-2.55357
AT1G78990	AT1G78990	transferase family protein [Source:RefSeq peptide;Acc:NP_178020]	-2.76667	-3.84211
AT1G79640	AT1G79640	Protein kinase superfamily protein,[Source:TAIR;Acc:AT1G79640]	1.92105	1.60317
AT1G79760	DTA4	downstream target of AGL15-4,[Source:TAIR;Acc:AT1G79760]	-2.53846	-3.16667
AT1G80280	AT1G80280	alpha/beta-Hydrolases superfamily protein,[Source:TAIR;Acc:AT1G80280]	-2.33735	-1.67708
AT1G80340	GA4H	gibberellin 3-oxidase 2,[Source:TAIR;Acc:AT1G80340]	-1.81111	-3.25
AT1G80960	AT1G80960	F-box and Leucine Rich Repeat domains containing protein,[Source:TAIR;Acc:AT1G80960]	-2	-3.83333
AT2G01520	AT2G01520	MLP-like protein 328 [Source:UniProtKB/Swiss-Prot;Acc:Q9ZVF3]	-11.5217	-9.94118
AT2G01880	PAP7	purple acid phosphatase 7,[Source:TAIR;Acc:AT2G01880]	-2.07692	-3.33333
AT2G03090	ATEXPA15	expansin A15,[Source:TAIR;Acc:AT2G03090]	-2.13939	-1.78261
AT2G04800	AT2G04800	unknown protein,[Source:TAIR;Acc:AT2G04800]	-3.625	-2.46429
AT2G15370	FUT5	fucosyltransferase 5,[Source:TAIR;Acc:AT2G15370]	-2.45455	-4
AT2G15890	MEE14	maternal effect embryo arrest 14,[Source:TAIR;Acc:AT2G15890]	2.32222	1.74598
AT2G16760	AT2G16760	Calcium-dependent phosphotriesterase superfamily protein,[Source:TAIR;Acc:AT2G16760]	-2.04545	-2.85714
AT2G16980	AT2G16980	Major facilitator superfamily protein,[Source:TAIR;Acc:AT2G16980]	-5	-2.64286
AT2G17040	anac036	NAC domain containing protein 36,[Source:TAIR;Acc:AT2G17040]	3.23529	1.5614
AT2G18000	TAF14	TBP-associated factor 14,[Source:TAIR;Acc:AT2G18000]	3.125	2.22222
AT2G18193	AT2G18193	P-loop containing nucleoside triphosphate hydrolases superfamily protein,[Source:TAIR;Acc:AT2G18193]	1.94075	3.24196
AT2G18540	AT2G18540	RmlC-like cupins superfamily protein,[Source:TAIR;Acc:AT2G18540]	-1.92308	-6.25
AT2G18600	AT2G18600	Ubiquitin-conjugating enzyme family protein,[Source:TAIR;Acc:AT2G18600]	5.66667	2.58696
AT2G18800	ATXTH21	xyloglucan endotransglucosylase/hydrolase 21,[Source:TAIR;Acc:AT2G18800]	-5.42857	-11.5
AT2G20750	ATEXPB1	expansin B1,[Source:TAIR;Acc:AT2G20750]	-1.62162	-3.21053
AT2G22122	AT2G22122	unknown protein,[Source:TAIR;Acc:AT2G22122]	-1.86667	-3.54839
AT2G22330	CYP79B3	cytochrome P450, family 79, subfamily B, polypeptide 3,[Source:TAIR;Acc:AT2G22330]	-1.73491	-2.71032
AT2G22510	AT2G22510	hydroxyproline-rich glycoprotein family protein,[Source:TAIR;Acc:AT2G22510]	-1.97959	-2.84884
AT2G22590	AT2G22590	UDP-Glycosyltransferase superfamily protein,[Source:TAIR;Acc:AT2G22590]	-1.66	-8
AT2G23540	AT2G23540	GDSL-like Lipase/Acylhydrolase superfamily protein,[Source:TAIR;Acc:AT2G23540]	-2.09375	-2.10759
AT2G24430	ANAC039	NAC domain containing protein 38,[Source:TAIR;Acc:AT2G24430]	-2.06667	-2.0625
AT2G25160	CYP82F1	cytochrome P450, family 82, subfamily F, polypeptide 1,[Source:TAIR;Acc:AT2G25160]	-1.66667	-4.42308
AT2G26040	PYL2	PYR1-like 2,[Source:TAIR;Acc:AT2G26040]	-1.89655	-2.16129
AT2G27370	AT2G27370	Uncharacterised protein family (UPF0497),[Source:TAIR;Acc:AT2G27370]	-3.90909	-4.44444
AT2G28120	AT2G28120	Major facilitator superfamily protein,[Source:TAIR;Acc:AT2G28120]	2.80556	1.73451
AT2G28140	AT2G28140	Protein of unknown function (DUF1635),[Source:TAIR;Acc:AT2G28140]	3	1.61429
AT2G28671	AT2G28671	unknown protein,[Source:TAIR;Acc:AT2G28671]	-2.37722	-2.72078
AT2G28780	AT2G28780	unknown protein,[Source:TAIR;Acc:AT2G28780]	-2.67273	-4.71014
AT2G28990	AT2G28990	Leucine-rich repeat protein kinase family protein,[Source:TAIR;Acc:AT2G28990]	-2.66667	-2.3913
AT2G29130	LAC2	laccase 2,[Source:TAIR;Acc:AT2G29130]	-5.75	-11.5
AT2G30250	WRKY25	WRKY DNA-binding protein 25,[Source:TAIR;Acc:AT2G30250]	1.75728	2.21287
AT2G32300	AT2G32300	UCC1 (UCLACYANIN 1); copper ion binding / electron carrier [Source:RefSeq peptide;Acc:NP_180789]	-1.82727	-2.14286
AT2G32510	MAPKKK17	mitogen-activated protein kinase kinase kinase 17,[Source:TAIR;Acc:AT2G32510]	-2.35484	-2.625
AT2G32990	AtGH9B8	glycosyl hydrolase 9B8,[Source:TAIR;Acc:AT2G32990]	-1.80263	-3.73913
AT2G33790	ATAGP30	arabinogalactan protein 30,[Source:TAIR;Acc:AT2G33790]	-2.85915	-10.1538
AT2G34190	AT2G34190	Xanthine/uracil permease family protein,[Source:TAIR;Acc:AT2G34190]	-3.35714	-1.85294
AT2G35765	AT2G35765	unknown protein,[Source:TAIR;Acc:AT2G35765]	-1.62791	-4.95455
AT2G35980	YLS9	Late embryogenesis abundant (LEA) hydroxyproline-rich glycoprotein family,[Source:TAIR;Acc:AT2G35980]	-2.9	-2.1
AT2G36100	AT2G36100	CASP1, CASPARIAN STRIP MEMBRANE DOMAIN PROTEIN 1	-2.36634	-2.8805
AT2G36640	ATECP63	embryonic cell protein 63,[Source:TAIR;Acc:AT2G36640]	-2.7619	-6.75
AT2G37870	AT2G37870	Bifunctional inhibitor/lipid-transfer protein/seed storage 2S albumin superfamily protein,[Source:TAIR;Acc:AT2G37870]	-3.05882	-3.57692
AT2G38390	AT2G38390	Peroxidase superfamily protein,[Source:TAIR;Acc:AT2G38390]	-3.69737	-1.98611
AT2G38530	LTP2	lipid transfer protein 2,[Source:TAIR;Acc:AT2G38530]	3.43082	1.85845
AT2G39040	AT2G39040	Peroxidase superfamily protein,[Source:TAIR;Acc:AT2G39040]	-3.56522	-8.1
AT2G39110	AT2G39110	Protein kinase superfamily protein,[Source:TAIR;Acc:AT2G39110]	-1.76768	-2.51648
AT2G39310	JAL22	jacalin-related lectin 22,[Source:TAIR;Acc:AT2G39310]	1.92726	1.59262
AT2G39430	AT2G39430	Disease resistance-responsive (dirigent-like protein) family protein,[Source:TAIR;Acc:AT2G39430]	-2.34653	-2.84034
AT2G39530	AT2G39530	Uncharacterised protein family (UPF0497),[Source:TAIR;Acc:AT2G39530]	-2.35185	-3.45
AT2G39980	AT2G39980	HXXXD-type acyl-transferase family protein,[Source:TAIR;Acc:AT2G39980]	2.02887	1.7482
AT2G40000	HSPRO2	ortholog of sugar beet HS1 PRO-1 2,[Source:TAIR;Acc:AT2G40000]	3.2275	1.47603
AT2G40080	ELF4	Protein of unknown function (DUF1313),[Source:TAIR;Acc:AT2G40080]	-2.19318	-3.28571
AT2G40113	AT2G40113	Pollen Ole e 1 allergen and extensin family protein,[Source:TAIR;Acc:AT2G40113]	-1.63158	-2.76923
AT2G40170	ATEM6	Stress induced protein,[Source:TAIR;Acc:AT2G40170]	-1.8125	-17
AT2G40200	AT2G40200	basic helix-loop-helix (bHLH) DNA-binding superfamily protein,[Source:TAIR;Acc:AT2G40200]	2.2973	4.21429
AT2G40320	TBL33	TRICHOME BIREFRINGENCE-LIKE 33,[Source:TAIR;Acc:AT2G40320]	-1.72973	-2.89286
AT2G41660	MIZ1	Protein of unknown function, DUF617,[Source:TAIR;Acc:AT2G41660]	-2.00462	-3.42949
AT2G42560	AT2G42560	late embryogenesis abundant domain-containing protein / LEA domain-containing protein,[Source:TAIR;Acc:AT2G42560]	-2.70588	-9.8
AT2G43050	ATPMEPCRD	Plant invertase/pectin methylesterase inhibitor superfamily,[Source:TAIR;Acc:AT2G43050]	-2.90476	-3.66667
AT2G44100	ATGDI1	guanosine nucleotide diphosphate dissociation inhibitor 1,[Source:TAIR;Acc:AT2G44100]	-3.75	-2.59459
AT2G45480	AtGRF9	growth-regulating factor 9,[Source:TAIR;Acc:AT2G45480]	-2.7	-4
AT2G46660	CYP78A6	cytochrome P450, family 78, subfamily A, polypeptide 6,[Source:TAIR;Acc:AT2G46660]	-2	-2.17241
AT2G47680	AT2G47680	zinc finger (CCCH type) helicase family protein,[Source:TAIR;Acc:AT2G47680]	2.73737	1.8972
AT2G47780	AT2G47780	Rubber elongation factor protein (REF),[Source:TAIR;Acc:AT2G47780]	5.06667	1.82105
AT2G47890	AT2G47890	B-box type zinc finger protein with CCT domain,[Source:TAIR;Acc:AT2G47890]	-2.18269	-1.65833
AT2G48130	AT2G48130	Bifunctional inhibitor/lipid-transfer protein/seed storage 2S albumin superfamily protein,[Source:TAIR;Acc:AT2G48130]	-2.54808	-3.57759
AT2G48140	EDA4	Bifunctional inhibitor/lipid-transfer protein/seed storage 2S albumin superfamily protein,[Source:TAIR;Acc:AT2G48140]	-2.66406	-2.34171
AT3G01050	MUB1	membrane-anchored ubiquitin-fold protein 1 precursor,[Source:TAIR;Acc:AT3G01050]	-2.09091	-2.17949
AT3G01190	AT3G01190	Peroxidase superfamily protein,[Source:TAIR;Acc:AT3G01190]	-2.62581	-3.60914
AT3G01260	AT3G01260	Galactose mutarotase-like superfamily protein,[Source:TAIR;Acc:AT3G01260]	-3.07692	-4.04
AT3G01600	anac044	NAC domain containing protein 44,[Source:TAIR;Acc:AT3G01600]	2.23196	2.09551
AT3G01960	AT3G01960	unknown protein,[Source:TAIR;Acc:AT3G01960]	-3.33333	-3.375
AT3G02840	AT3G02840	ARM repeat superfamily protein,[Source:TAIR;Acc:AT3G02840]	-2.33333	-4.68
AT3G05600	AT3G05600	alpha/beta-Hydrolases superfamily protein,[Source:TAIR;Acc:AT3G05600]	-2.56098	-3.06667
AT3G05727	AT3G05727	S locus-related glycoprotein 1 (SLR1) binding pollen coat protein family,[Source:TAIR;Acc:AT3G05727]	-3.99	-77
AT3G05890	RCI2B	Low temperature and salt responsive protein family,[Source:TAIR;Acc:AT3G05890]	-1.96875	-2.9875
AT3G07800	AT3G07800	thymidine kinase, putative [Source:RefSeq peptide;Acc:NP_187437]	2.56	2.02422
AT3G08770	LTP6	lipid transfer protein 6,[Source:TAIR;Acc:AT3G08770]	-2.24112	-4.07778
AT3G10190	AT3G10190	Calcium-binding EF-hand family protein,[Source:TAIR;Acc:AT3G10190]	1.54217	2.01587
AT3G10340	PAL4	phenylalanine ammonia-lyase 4,[Source:TAIR;Acc:AT3G10340]	-2.0549	-3.71523
AT3G10930	AT3G10930	unknown protein,[Source:TAIR;Acc:AT3G10930]	2.42105	2.17647
AT3G11340	AT3G11340	UDP-Glycosyltransferase superfamily protein,[Source:TAIR;Acc:AT3G11340]	-1.77164	-2.35659
AT3G11430	ATGPAT5	glycerol-3-phosphate acyltransferase 5,[Source:TAIR;Acc:AT3G11430]	-2.48936	-4.21053
AT3G11550	AT3G11550	Uncharacterised protein family (UPF0497),[Source:TAIR;Acc:AT3G11550]	-3.16667	-2.19697
AT3G12955	AT3G12955	SAUR-like auxin-responsive protein family,[Source:TAIR;Acc:AT3G12955]	-3	-4.42857
AT3G13600	AT3G13600	calmodulin-binding family protein,[Source:TAIR;Acc:AT3G13600]	-1.88889	-3.2
AT3G13960	AtGRF5	growth-regulating factor 5,[Source:TAIR;Acc:AT3G13960]	-3.86207	-4.2
AT3G14550	GGPS3	geranylgeranyl pyrophosphate synthase 3,[Source:TAIR;Acc:AT3G14550]	-2.48	-2.66667
AT3G15720	AT3G15720	Pectin lyase-like superfamily protein,[Source:TAIR;Acc:AT3G15720]	3.46939	2.52632
AT3G16360	AHP4	HPT phosphotransmitter 4,[Source:TAIR;Acc:AT3G16360]	5.22222	3.4
AT3G17690	ATCNGC19	cyclic nucleotide gated channel 19,[Source:TAIR;Acc:AT3G17690]	5	3.14286
AT3G18610	PARLL1	nucleolin like 2,[Source:TAIR;Acc:AT3G18610]	1.94286	1.66667
AT3G20395	AT3G20395	RING/U-box superfamily protein,[Source:TAIR;Acc:AT3G20395]	3	2.20225
AT3G20470	GRP-5	glycine-rich protein 5,[Source:TAIR;Acc:AT3G20470]	2.4249	3.35897
AT3G20865	AGP40	arabinogalactan protein 40,[Source:TAIR;Acc:AT3G20865]	-2.05	-2.42857
AT3G21030	AT3G21030	transposable element gene,[Source:TAIR;Acc:AT3G21030]	3.375	2.875
AT3G21090	AT3G21090	ABC-2 type transporter family protein,[Source:TAIR;Acc:AT3G21090]	2.11765	2.18984
AT3G21180	ACA9	autoinhibited Ca(2+)-ATPase 9,[Source:TAIR;Acc:AT3G21180]	-2	-3.875
AT3G21310	AT3G21310	Core-2/I-branching beta-1,6-N-acetylglucosaminyltransferase family protein,[Source:TAIR;Acc:AT3G21310]	3.07143	2.58333
AT3G22142	AT3G22142	Bifunctional inhibitor/lipid-transfer protein/seed storage 2S albumin superfamily protein,[Source:TAIR;Acc:AT3G22142]	2.47162	1.75361
AT3G22550	AT3G22550	Protein of unknown function (DUF581),[Source:TAIR;Acc:AT3G22550]	2.65826	1.77099
AT3G22560	AT3G22560	Acyl-CoA N-acyltransferases (NAT) superfamily protein,[Source:TAIR;Acc:AT3G22560]	1.89655	2.54545
AT3G22570	AT3G22570	Bifunctional inhibitor/lipid-transfer protein/seed storage 2S albumin superfamily protein,[Source:TAIR;Acc:AT3G22570]	-2.69565	-3.09524
AT3G22600	AT3G22600	Bifunctional inhibitor/lipid-transfer protein/seed storage 2S albumin superfamily protein,[Source:TAIR;Acc:AT3G22600]	-2.02736	-3.58317
AT3G22620	AT3G22620	Bifunctional inhibitor/lipid-transfer protein/seed storage 2S albumin superfamily protein,[Source:TAIR;Acc:AT3G22620]	-3.05769	-4.96701
AT3G22640	PAP85	cupin family protein,[Source:TAIR;Acc:AT3G22640]	-9.07143	-1.75
AT3G22910	AT3G22910	ATPase E1-E2 type family protein / haloacid dehalogenase-like hydrolase family protein,[Source:TAIR;Acc:AT3G22910]	4.84211	2.33333
AT3G23175	AT3G23175	HR-like lesion-inducing protein-related,[Source:TAIR;Acc:AT3G23175]	-1.65217	-2.44681
AT3G24020	AT3G24020	Disease resistance-responsive (dirigent-like protein) family protein,[Source:TAIR;Acc:AT3G24020]	-2.53061	-2.28972
AT3G24300	AMT1;3	ammonium transporter 1;3,[Source:TAIR;Acc:AT3G24300]	-1.86441	-2.44681
AT3G25190	AT3G25190	Vacuolar iron transporter (VIT) family protein,[Source:TAIR;Acc:AT3G25190]	-2.16211	-1.64615
AT3G25710	BHLH32	basic helix-loop-helix 32,[Source:TAIR;Acc:AT3G25710]	-1.76852	-2.39394
AT3G25820	TPS-CIN	terpene synthase-like sequence-1,8-cineole,[Source:TAIR;Acc:AT3G25820]	-5.39474	-3.65152
AT3G25830	ATTPS-CIN	terpene synthase-like sequence-1,8-cineole,[Source:TAIR;Acc:AT3G25830]	-4.71111	-3.83824
AT3G26610	AT3G26610	Pectin lyase-like superfamily protein,[Source:TAIR;Acc:AT3G26610]	-2.20833	-3.8
AT3G27025	AT3G27025	unknown protein,[Source:TAIR;Acc:AT3G27025]	5.5625	2
AT3G27150	AT3G27150	Galactose oxidase/kelch repeat superfamily protein,[Source:TAIR;Acc:AT3G27150]	-2.34286	-3.92308
AT3G27400	AT3G27400	Pectin lyase-like superfamily protein,[Source:TAIR;Acc:AT3G27400]	3.87037	1.63768
AT3G27620	AOX1C	alternative oxidase 1C,[Source:TAIR;Acc:AT3G27620]	4.8125	2.27778
AT3G27630	AT3G27630	unknown protein,[Source:TAIR;Acc:AT3G27630]	11.8571	4.33333
AT3G28300	AT14A	Protein of unknown function (DUF677),[Source:TAIR;Acc:AT3G28300]	1.90244	1.58696
AT3G28540	AT3G28540	P-loop containing nucleoside triphosphate hydrolases superfamily protein,[Source:TAIR;Acc:AT3G28540]	4.4902	1.65
AT3G28580	AT3G28580	P-loop containing nucleoside triphosphate hydrolases superfamily protein,[Source:TAIR;Acc:AT3G28580]	3.01695	11
AT3G29630	AT3G29630	UDP-Glycosyltransferase superfamily protein,[Source:TAIR;Acc:AT3G29630]	-2.2	-4.5
AT3G29780	RALFL27	ralf-like 27,[Source:TAIR;Acc:AT3G29780]	-4.71429	-4.72727
AT3G32920	AT3G32920	P-loop containing nucleoside triphosphate hydrolases superfamily protein,[Source:TAIR;Acc:AT3G32920]	6.8	4.14286
AT3G43190	SUS4	sucrose synthase 4,[Source:TAIR;Acc:AT3G43190]	-1.95833	-2.5
AT3G44326	AT3G44326	F-box family protein,[Source:TAIR;Acc:AT3G44326]	-5.23077	-6.25
AT3G45070	AT3G45070	P-loop containing nucleoside triphosphate hydrolases superfamily protein,[Source:TAIR;Acc:AT3G45070]	-1.95455	-3.16667
AT3G45160	AT3G45160	Putative membrane lipoprotein,[Source:TAIR;Acc:AT3G45160]	-1.61345	-2.32609
AT3G45700	AT3G45700	Major facilitator superfamily protein,[Source:TAIR;Acc:AT3G45700]	-3.52941	-17.1667
AT3G45710	AT3G45710	Major facilitator superfamily protein,[Source:TAIR;Acc:AT3G45710]	-2.63248	-2.71687
AT3G45730	AT3G45730	unknown protein,[Source:TAIR;Acc:AT3G45730]	1.64964	2.612
AT3G45840	AT3G45840	Cysteine/Histidine-rich C1 domain family protein,[Source:TAIR;Acc:AT3G45840]	-1.73333	-2.33333
AT3G46230	AT3G46230	HEAT SHOCK PROTEIN 17.4, ATHSP17.4	2.06522	4.38667
AT3G46330	AT3G46330	Probable LRR receptor-like serine/threonine-protein kinase MEE39 Precursor (EC 2,7,11,1)(Protein MATERNAL EFFECT EMBRYO ARREST 39) [Source:UniProtKB/Swiss-Prot;Acc:C0LGP2]	-3.55556	-2
AT3G47380	AT3G47380	Plant invertase/pectin methylesterase inhibitor superfamily protein,[Source:TAIR;Acc:AT3G47380]	3.25	3.16667
AT3G49330	AT3G49330	Plant invertase/pectin methylesterase inhibitor superfamily protein,[Source:TAIR;Acc:AT3G49330]	-1.82353	-3.96154
AT3G49845	AT3G49845	unknown protein,[Source:TAIR;Acc:AT3G49845]	-3.26667	-3.38095
AT3G50400	AT3G50400	GDSL-like Lipase/Acylhydrolase superfamily protein,[Source:TAIR;Acc:AT3G50400]	-2.59259	-3.95652
AT3G50930	BCS1	cytochrome BC1 synthesis,[Source:TAIR;Acc:AT3G50930]	2.94286	1.81967
AT3G50970	LTI30	dehydrin family protein,[Source:TAIR;Acc:AT3G50970]	-1.88936	-2.51079
AT3G51350	AT3G51350	Eukaryotic aspartyl protease family protein,[Source:TAIR;Acc:AT3G51350]	-3.2	-3.26667
AT3G51750	AT3G51750	unknown protein,[Source:TAIR;Acc:AT3G51750]	-2.56522	-1.83333
AT3G51810	ATEM1	Stress induced protein,[Source:TAIR;Acc:AT3G51810]	-14.6	-10
AT3G52535	AT3G52535	other RNA,[Source:TAIR;Acc:AT3G52535]	-2.85714	-1.91667
AT3G53090	UPL7	ubiquitin-protein ligase 7,[Source:TAIR;Acc:AT3G53090]	-1.77901	-2.5
AT3G53210	AT3G53210	nodulin MtN21 /EamA-like transporter family protein,[Source:TAIR;Acc:AT3G53210]	1.69811	2.38636
AT3G55230	AT3G55230	Disease resistance-responsive (dirigent-like protein) family protein,[Source:TAIR;Acc:AT3G55230]	-2.03553	-2.37991
AT3G56230	AT3G56230	BTB/POZ domain-containing protein,[Source:TAIR;Acc:AT3G56230]	-2.15385	-2.26667
AT3G57010	AT3G57010	Calcium-dependent phosphotriesterase superfamily protein,[Source:TAIR;Acc:AT3G57010]	-2.41753	-3.31532
AT3G57640	AT3G57640	Protein kinase superfamily protein,[Source:TAIR;Acc:AT3G57640]	1.78571	2.06667
AT3G58270	AT3G58270	Arabidopsis phospholipase-like protein (PEARLI 4) with TRAF-like domain,[Source:TAIR;Acc:AT3G58270]	3.76667	2.67961
AT3G59370	AT3G59370	unknown protein [Source:RefSeq peptide;Acc:NP_191496]	-5.83333	-14
AT3G60900	AT3G60900	Fasciclin-like arabinogalactan protein 10 Precursor [Source:UniProtKB/Swiss-Prot;Acc:Q9LZX4]	-2.14286	-2.76923
AT4G00910	AT4G00910	Aluminium activated malate transporter family protein,[Source:TAIR;Acc:AT4G00910]	-1.84	-4.3913
AT4G01110	AT4G01110	unknown protein,[Source:TAIR;Acc:AT4G01110]	-1.91667	-4.42857
AT4G02090	AT4G02090	unknown protein,[Source:TAIR;Acc:AT4G02090]	-2.89286	-2.65
AT4G02330	ATPMEPCRB	Plant invertase/pectin methylesterase inhibitor superfamily,[Source:TAIR;Acc:AT4G02330]	4.41525	1.58313
AT4G02390	APP	poly(ADP-ribose) polymerase,[Source:TAIR;Acc:AT4G02390]	4.81818	3.08
AT4G02810	AT4G02810	Protein of unknown function (DUF3049),[Source:TAIR;Acc:AT4G02810]	-1.71429	-3.71429
AT4G03540	AT4G03540	Uncharacterised protein family (UPF0497),[Source:TAIR;Acc:AT4G03540]	-1.66667	-2.24138
AT4G05380	AT4G05380	AAA-type ATPase family protein [Source:RefSeq peptide;Acc:NP_192447]	5.4	8
AT4G09990	AT4G09990	Protein of unknown function (DUF579),[Source:TAIR;Acc:AT4G09990]	-1.60465	-2.52381
AT4G10310	HKT1	high-affinity K+ transporter 1,[Source:TAIR;Acc:AT4G10310]	-2.00971	-2.74576
AT4G11290	AT4G11290	Peroxidase superfamily protein,[Source:TAIR;Acc:AT4G11290]	-1.97619	-3.79245
AT4G11320	AT4G11320	Papain family cysteine protease,[Source:TAIR;Acc:AT4G11320]	-7.9542	-13.4464
AT4G12510	AT4G12510	protease inhibitor/seed storage/lipid transfer protein (LTP) family protein [Source:RefSeq peptide;Acc:NP_567392]	-3.40984	-12.1163
AT4G12520	AT4G12520	protease inhibitor/seed storage/lipid transfer protein (LTP) family protein [Source:RefSeq peptide;Acc:NP_567392]	-2.92405	-9.16923
AT4G12545	AT4G12545	protease inhibitor/seed storage/lipid transfer protein (LTP) family protein [Source:RefSeq peptide;Acc:NP_849366]	-2.57447	-4.475
AT4G12550	AT4G12550	AIR1; lipid binding [Source:RefSeq peptide;Acc:NP_192992]	-6.80952	-12.7333
AT4G12735	AT4G12735	unknown protein,[Source:TAIR;Acc:AT4G12735]	3.28571	3.81818
AT4G13710	AT4G13710	Pectin lyase-like superfamily protein,[Source:TAIR;Acc:AT4G13710]	-2.06452	-2.33333
AT4G14010	RALFL32	ralf-like 32,[Source:TAIR;Acc:AT4G14010]	-2.01277	-2.53333
AT4G14130	XTR7	xyloglucan endotransglucosylase/hydrolase 15,[Source:TAIR;Acc:AT4G14130]	-1.94898	-2.69828
AT4G14650	AT4G14650	unknown protein,[Source:TAIR;Acc:AT4G14650]	-1.86364	-3.125
AT4G14940	AT4G14930	acid phosphatase survival protein SurE, putative [Source:RefSeq peptide;Acc:NP_567449]	-1.68571	-2.33333
AT4G15290	ATCSLB05	Cellulose synthase family protein,[Source:TAIR;Acc:AT4G15290]	-4.8	-8.25
AT4G15340	ATPEN1	pentacyclic triterpene synthase 1,[Source:TAIR;Acc:AT4G15340]	-2.51282	-3.35484
AT4G16240	AT4G16240	unknown protein,[Source:TAIR;Acc:AT4G16240]	2.52381	1.55556
AT4G17215	AT4G17215	Pollen Ole e 1 allergen and extensin family protein,[Source:TAIR;Acc:AT4G17215]	-1.96552	-2.2
AT4G17270	AT4G17270	Mo25 family protein,[Source:TAIR;Acc:AT4G17270]	-1.79646	-2.28889
AT4G17710	HDG4	homeodomain GLABROUS 4,[Source:TAIR;Acc:AT4G17710]	32	14
AT4G18170	WRKY28	WRKY DNA-binding protein 28,[Source:TAIR;Acc:AT4G18170]	2.41176	1.75758
AT4G18770	MYB98	myb domain protein 98,[Source:TAIR;Acc:AT4G18770]	-2.6	-4.66667
AT4G19420	AT4G19420	Pectinacetylesterase family protein,[Source:TAIR;Acc:AT4G19420]	2.58763	2.52964
AT4G19570	AT4G19570	Chaperone DnaJ-domain superfamily protein,[Source:TAIR;Acc:AT4G19570]	3.71429	4.33333
AT4G20240	CYP71A27	cytochrome P450, family 71, subfamily A, polypeptide 27,[Source:TAIR;Acc:AT4G20240]	-2.82857	-4.44
AT4G20390	AT4G20390	UPF0497 membrane protein At4g20390 [Source:UniProtKB/Swiss-Prot;Acc:Q9SUP0]	-2.2381	-4.19718
AT4G21070	ATBRCA1	breast cancer susceptibility1,[Source:TAIR;Acc:AT4G21070]	2.60185	1.4698
AT4G21490	AT4G21490	NDB3; NADH dehydrogenase [Source:RefSeq peptide;Acc:NP_193880]	2.4375	2
AT4G21650	AT4G21650	Subtilase family protein,[Source:TAIR;Acc:AT4G21650]	-4.35714	-2.42105
AT4G21820	AT4G21820	binding;calmodulin binding,[Source:TAIR;Acc:AT4G21820]	-2.66667	-1.85185
AT4G22212	AT4G22212	Arabidopsis defensin-like protein,[Source:TAIR;Acc:AT4G22212]	-1.79268	-2.5
AT4G22460	AT4G22460	Bifunctional inhibitor/lipid-transfer protein/seed storage 2S albumin superfamily protein,[Source:TAIR;Acc:AT4G22460]	-3.8	-5.85714
AT4G22470	AT4G22470	protease inhibitor/seed storage/lipid transfer protein (LTP) family protein,[Source:TAIR;Acc:AT4G22470]	2.33333	1.79798
AT4G22485	AT4G22485	Bifunctional inhibitor/lipid-transfer protein/seed storage 2S albumin superfamily protein,[Source:TAIR;Acc:AT4G22485]	-3.95273	-1061
AT4G22490	AT4G22490	Bifunctional inhibitor/lipid-transfer protein/seed storage 2S albumin superfamily protein,[Source:TAIR;Acc:AT4G22490]	-4.65775	-252
AT4G22505	AT4G22505	Bifunctional inhibitor/lipid-transfer protein/seed storage 2S albumin superfamily protein,[Source:TAIR;Acc:AT4G22505]	-4.39053	-700
AT4G22510	AT4G22510	unknown protein,[Source:TAIR;Acc:AT4G22510]	-4.63333	-148
AT4G22513	AT4G22513	Bifunctional inhibitor/lipid-transfer protein/seed storage 2S albumin superfamily protein,[Source:TAIR;Acc:AT4G22513]	-4.18788	-124
AT4G22520	AT4G22520	Bifunctional inhibitor/lipid-transfer protein/seed storage 2S albumin superfamily protein,[Source:TAIR;Acc:AT4G22520]	-2.9375	-44
AT4G22666	AT4G22666	Bifunctional inhibitor/lipid-transfer protein/seed storage 2S albumin superfamily protein,[Source:TAIR;Acc:AT4G22666]	-2.38462	-5.55172
AT4G22810	AT4G22810	DNA-binding protein-related [Source:RefSeq peptide;Acc:NP_194012]	-1.61702	-2.88235
AT4G22960	AT4G22960	Protein of unknown function (DUF544),[Source:TAIR;Acc:AT4G22960]	37	47
AT4G23220	CRK14	cysteine-rich RLK (RECEPTOR-like protein kinase) 14,[Source:TAIR;Acc:AT4G23220]	2.53333	4.2
AT4G23600	CORI3	Tyrosine transaminase family protein,[Source:TAIR;Acc:AT4G23600]	2.90588	4.85714
AT4G23720	AT4G23720	Protein of unknown function (DUF1191),[Source:TAIR;Acc:AT4G23720]	8.66667	2.5
AT4G23750	CRF2	cytokinin response factor 2,[Source:TAIR;Acc:AT4G23750]	-2.52985	-2.01754
AT4G24310	AT4G24310	Protein of unknown function (DUF679),[Source:TAIR;Acc:AT4G24310]	-2.15385	-3.66667
AT4G25250	AT4G25250	Plant invertase/pectin methylesterase inhibitor superfamily protein,[Source:TAIR;Acc:AT4G25250]	-2.86667	-6.11111
AT4G26320	AT4G26320	Arabinogalactan peptide 13 Precursor (AG-peptide 13) [Source:UniProtKB/Swiss-Prot;Acc:Q9STQ3]	-3	-9.58333
AT4G28110	AT4G28110	AtMYB41 (myb domain protein 41); DNA binding	-1.65	-7.125
AT4G28410	AT4G28410	Tyrosine transaminase family protein,[Source:TAIR;Acc:AT4G28410]	-1.95	-2.46875
AT4G28940	AT4G28940	catalytic [Source:RefSeq peptide;Acc:NP_194623]	-2.7	-2.26667
AT4G29930	AT4G29930	basic helix-loop-helix (bHLH) DNA-binding superfamily protein,[Source:TAIR;Acc:AT4G29930]	-2.4	-3.81818
AT4G31805	AT4G31805	WRKY family transcription factor,[Source:TAIR;Acc:AT4G31805]	-3.27869	-1.9375
AT4G31877	AT4G31877	(MIR156C) otherRNA [Source:RefSeq DNA;Acc:NR_023038]	2.41905	3.91549
AT4G33610	AT4G33610	glycine-rich protein [Source:RefSeq peptide;Acc:NP_195087]	-5.77551	-7.33871
AT4G33720	AT4G33720	CAP (Cysteine-rich secretory proteins, Antigen 5, and Pathogenesis-related 1 protein) superfamily protein,[Source:TAIR;Acc:AT4G33720]	-3.13333	-28
AT4G33790	CER4	Jojoba acyl CoA reductase-related male sterility protein,[Source:TAIR;Acc:AT4G33790]	-2.16667	-3.28571
AT4G34320	AT4G34320	Protein of unknown function (DUF677),[Source:TAIR;Acc:AT4G34320]	3.84615	2.38462
AT4G35160	AT4G35160	O-methyltransferase family protein,[Source:TAIR;Acc:AT4G35160]	-1.91429	-4.21739
AT4G36430	AT4G36430	Peroxidase superfamily protein,[Source:TAIR;Acc:AT4G36430]	2.65278	3.65116
AT4G36600	AT4G36600	Late embryogenesis abundant (LEA) protein,[Source:TAIR;Acc:AT4G36600]	-4.61538	-8
AT4G37370	AT4G37370	CYP81D8; electron carrier/ heme binding / iron ion binding / monooxygenase/ oxygen binding [Source:RefSeq peptide;Acc:NP_195453]	2.09302	2.23214
AT4G37390	YDK1	Auxin-responsive GH3 family protein,[Source:TAIR;Acc:AT4G37390]	-1.75676	-2.91892
AT4G37409	AT4G37409	unknown protein,[Source:TAIR;Acc:AT4G37409]	-3.45686	-4.32317
AT4G37490	AT4G37490	Cyclin-B1-1 (G2/mitotic-specific cyclin-B1-1)(CycB1;1)(Cyc1-At) [Source:UniProtKB/Swiss-Prot;Acc:P30183]	2.31169	1.56604
AT4G38080	AT4G38080	hydroxyproline-rich glycoprotein family protein,[Source:TAIR;Acc:AT4G38080]	-2.34545	-2.93277
AT4G38390	RHS17	root hair specific 17,[Source:TAIR;Acc:AT4G38390]	-3.75	-2.27778
AT4G38780	AT4G38780	Pre-mRNA-processing-splicing factor,[Source:TAIR;Acc:AT4G38780]	2.0989	2.17073
AT4G39500	AT4G39500	CYP96A11; electron carrier/ heme binding / iron ion binding / monooxygenase/ oxygen binding [Source:RefSeq peptide;Acc:NP_195660]	4.25	2.16667
AT4G39830	AT4G39830	Cupredoxin superfamily protein,[Source:TAIR;Acc:AT4G39830]	2.0625	1.66667
AT4G40090	AT4G40090	Classical arabinogalactan protein 3 Precursor [Source:UniProtKB/Swiss-Prot;Acc:Q9ZT17]	-1.72449	-3.3178
AT5G01010	AT5G01010	No description	-2.43354	-2.66292
AT5G01015	AT5G01015	unknown protein,[Source:TAIR;Acc:AT5G01015]	-5.89744	-13.2353
AT5G01050	AT5G01050	Laccase/Diphenol oxidase family protein,[Source:TAIR;Acc:AT5G01050]	-1.75	-2.47059
AT5G01335	AT5G01335	transposable element gene,[Source:TAIR;Acc:AT5G01335]	1.66667	4.13636
AT5G02550	AT5G02550	unknown protein,[Source:TAIR;Acc:AT5G02550]	-1.79167	-2.25926
AT5G03495	AT5G03495	RNA-binding (RRM/RBD/RNP motifs) family protein,[Source:TAIR;Acc:AT5G03495]	1.5625	2.93333
AT5G03780	TRFL10	TRF-like 10,[Source:TAIR;Acc:AT5G03780]	3.48246	2.12195
AT5G03960	IQD12	IQ-domain 12,[Source:TAIR;Acc:AT5G03960]	-2.42857	-5.33333
AT5G05420	AT5G05420	FKBP-like peptidyl-prolyl cis-trans isomerase family protein,[Source:TAIR;Acc:AT5G05420]	1.75	3.08696
AT5G06090	ATGPAT7	glycerol-3-phosphate acyltransferase 7,[Source:TAIR;Acc:AT5G06090]	-2.30769	-2.57895
AT5G06200	AT5G06200	Uncharacterised protein family (UPF0497),[Source:TAIR;Acc:AT5G06200]	-2.5	-3.47059
AT5G06720	ATPA2	peroxidase 2,[Source:TAIR;Acc:AT5G06720]	5.45455	2.75
AT5G06760	LEA4-5	Late Embryogenesis Abundant 4-5,[Source:TAIR;Acc:AT5G06760]	-2.21053	-4.95
AT5G06870	PGIP2	polygalacturonase inhibiting protein 2,[Source:TAIR;Acc:AT5G06870]	1.95122	2.71563
AT5G07030	AT5G07030	Eukaryotic aspartyl protease family protein,[Source:TAIR;Acc:AT5G07030]	-2.10315	-2.71204
AT5G07330	AT5G07330	unknown protein,[Source:TAIR;Acc:AT5G07330]	-2.625	-7
AT5G07475	AT5G07475	Cupredoxin superfamily protein,[Source:TAIR;Acc:AT5G07475]	-1.82353	-2.5
AT5G07610	AT5G07610	F-box family protein,[Source:TAIR;Acc:AT5G07610]	3.41667	2.69697
AT5G07690	MYB29	myb domain protein 29,[Source:TAIR;Acc:AT5G07690]	-1.68817	-3.34615
AT5G08250	AT5G08250	Cytochrome P450 superfamily protein,[Source:TAIR;Acc:AT5G08250]	-6	-2
AT5G09220	AAP2	amino acid permease 2,[Source:TAIR;Acc:AT5G09220]	-2.01374	-2.49893
AT5G09520	AT5G09520	hydroxyproline-rich glycoprotein family protein,[Source:TAIR;Acc:AT5G09520]	-2.12	-3.7037
AT5G09978	PEP7	elicitor peptide 7 precursor,[Source:TAIR;Acc:AT5G09978]	-2.2	-1.88889
AT5G10230	ANNAT7	annexin 7,[Source:TAIR;Acc:AT5G10230]	-4.22222	-4.7037
AT5G10430	AGP4	arabinogalactan protein 4,[Source:TAIR;Acc:AT5G10430]	-2.70238	-3.14815
AT5G11410	AT5G11410	protein kinase family protein [Source:RefSeq peptide;Acc:NP_196702]	6.89474	4.04167
AT5G11460	AT5G11460	senescence-associated protein-related [Source:RefSeq peptide;Acc:NP_196707]	1.72662	2.2459
AT5G12020	HSP17,6II	17,6 kDa class II heat shock protein,[Source:TAIR;Acc:AT5G12020]	1.98148	4.04054
AT5G12030	AT-HSP17,6A	heat shock protein 17,6A,[Source:TAIR;Acc:AT5G12030]	3.76364	2.92754
AT5G12420	AT5G12420	O-acyltransferase (WSD1-like) family protein,[Source:TAIR;Acc:AT5G12420]	-2.00658	-3.11888
AT5G13580	AT5G13580	ABC-2 type transporter family protein,[Source:TAIR;Acc:AT5G13580]	-2.44231	-4.02959
AT5G13900	AT5G13900	Bifunctional inhibitor/lipid-transfer protein/seed storage 2S albumin superfamily protein,[Source:TAIR;Acc:AT5G13900]	-2.71429	-5.42308
AT5G14930	SAG101	senescence-associated gene 101,[Source:TAIR;Acc:AT5G14930]	2.9596	2.13699
AT5G15180	AT5G15180	Peroxidase superfamily protein,[Source:TAIR;Acc:AT5G15180]	-2.3871	-6.93333
AT5G15265	AT5G15265	unknown protein,[Source:TAIR;Acc:AT5G15265]	-3.66667	-2
AT5G15290	AT5G15290	Uncharacterised protein family (UPF0497),[Source:TAIR;Acc:AT5G15290]	-22	-6.33333
AT5G15530	BCCP2	biotin carboxyl carrier protein 2,[Source:TAIR;Acc:AT5G15530]	-2.70968	-1.59649
AT5G16080	AtCXE17	carboxyesterase 17,[Source:TAIR;Acc:AT5G16080]	2.97959	3
AT5G16530	PIN5	Auxin efflux carrier family protein,[Source:TAIR;Acc:AT5G16530]	-3	-4.8
AT5G18860	AT5G18860	inosine-uridine preferring nucleoside hydrolase family protein,[Source:TAIR;Acc:AT5G18860]	-2.02759	-2.35057
AT5G18930	BUD2	Adenosylmethionine decarboxylase family protein,[Source:TAIR;Acc:AT5G18930]	-3.11111	-3
AT5G19530	ACL5	S-adenosyl-L-methionine-dependent methyltransferases superfamily protein,[Source:TAIR;Acc:AT5G19530]	-1.96154	-2.424
AT5G20850	ATRAD51	RAS associated with diabetes protein 51,[Source:TAIR;Acc:AT5G20850]	2.2	2.08511
AT5G23190	CYP86B1	cytochrome P450, family 86, subfamily B, polypeptide 1,[Source:TAIR;Acc:AT5G23190]	-1.98529	-2.85185
AT5G23840	AT5G23840	MD-2-related lipid recognition domain-containing protein,[Source:TAIR;Acc:AT5G23840]	-7.5	-9.33333
AT5G23940	EMB3009	HXXXD-type acyl-transferase family protein,[Source:TAIR;Acc:AT5G23940]	-2.34615	-2.64773
AT5G23990	ATFRO5	ferric reduction oxidase 5,[Source:TAIR;Acc:AT5G23990]	-3.76667	-22.25
AT5G24280	GMI1	gamma-irradiation and mitomycin c induced 1,[Source:TAIR;Acc:AT5G24280]	2.00937	2.13693
AT5G24410	PGL4	6-phosphogluconolactonase 4,[Source:TAIR;Acc:AT5G24410]	-2.5	-3.15385
AT5G24420	PGL5	6-phosphogluconolactonase 5,[Source:TAIR;Acc:AT5G24420]	-2.175	-2.75369
AT5G24580	AT5G24580	Heavy metal transport/detoxification superfamily protein,[Source:TAIR;Acc:AT5G24580]	-1.81564	-2.42424
AT5G25190	AT5G25190	Integrase-type DNA-binding superfamily protein,[Source:TAIR;Acc:AT5G25190]	2.72571	2.62526
AT5G26190	AT5G26190	Cysteine/Histidine-rich C1 domain family protein,[Source:TAIR;Acc:AT5G26190]	3.66667	2.625
AT5G33355	AT5G33355	Defensin-like protein 207 Precursor [Source:UniProtKB/Swiss-Prot;Acc:Q3E8R5]	-4.42857	-2.72
AT5G35480	AT5G35480	unknown protein [Source:RefSeq peptide;Acc:NP_198398]	-1.91667	-2.36842
AT5G35940	AT5G35940	Mannose-binding lectin superfamily protein,[Source:TAIR;Acc:AT5G35940]	-2.5625	-2.2
AT5G38030	AT5G38030	MATE efflux family protein,[Source:TAIR;Acc:AT5G38030]	-2.05263	-2.15
AT5G38565	AT5G38565	F-box/FBD-like domains containing protein,[Source:TAIR;Acc:AT5G38565]	2	2.07692
AT5G38930	AT5G38930	RmlC-like cupins superfamily protein,[Source:TAIR;Acc:AT5G38930]	-2.07143	-12.6667
AT5G38940	AT5G38940	RmlC-like cupins superfamily protein,[Source:TAIR;Acc:AT5G38940]	-2.09639	-2.73494
AT5G41040	AT5G41040	HXXXD-type acyl-transferase family protein,[Source:TAIR;Acc:AT5G41040]	-1.74933	-2.59611
AT5G41761	AT5G41761	unknown protein [Source:RefSeq peptide;Acc:NP_001119353]	2.65714	4.25
AT5G42180	AT5G42180	Peroxidase superfamily protein,[Source:TAIR;Acc:AT5G42180]	-1.93805	-3.15179
AT5G42500	AT5G42500	Disease resistance-responsive (dirigent-like protein) family protein,[Source:TAIR;Acc:AT5G42500]	-2.23077	-4.1
AT5G42510	AT5G42510	disease resistance-responsive family protein [Source:RefSeq peptide;Acc:NP_199066]	-2.21429	-3.26316
AT5G43520	AT5G43520	DC1 domain-containing protein [Source:RefSeq peptide;Acc:NP_199165]	-2.06667	-4.35714
AT5G43980	PDLP1	plasmodesmata-located protein 1,[Source:TAIR;Acc:AT5G43980]	2.3125	2.22222
AT5G44310	AT5G44310	Late embryogenesis abundant protein (LEA) family protein,[Source:TAIR;Acc:AT5G44310]	-6.5	-3.33333
AT5G44350	AT5G44350	ethylene-responsive nuclear protein -related,[Source:TAIR;Acc:AT5G44350]	-2.58333	-6.75
AT5G44480	DUR	NAD(P)-binding Rossmann-fold superfamily protein,[Source:TAIR;Acc:AT5G44480]	-1.78333	-2.20635
AT5G44572	AT5G44572	unknown protein,[Source:TAIR;Acc:AT5G44572]	2.87879	2.13699
AT5G46710	AT5G46710	PLATZ transcription factor family protein	3.04167	2.29268
AT5G46890	AT5G46890	Bifunctional inhibitor/lipid-transfer protein/seed storage 2S albumin superfamily protein,[Source:TAIR;Acc:AT5G46890]	-9	-55.6667
AT5G46900	AT5G46900	Bifunctional inhibitor/lipid-transfer protein/seed storage 2S albumin superfamily protein,[Source:TAIR;Acc:AT5G46900]	-7.83721	-28.5882
AT5G47000	AT5G47000	Peroxidase superfamily protein,[Source:TAIR;Acc:AT5G47000]	3.83333	2.07143
AT5G47450	AT5G47450	Aquaporin TIP2-3 (Tonoplast intrinsic protein 2-3)(AtTIP2;3) [Source:UniProtKB/Swiss-Prot;Acc:Q9FGL2]	-7	-16.2188
AT5G47500	AT5G47500	Probable pectinesterase 68 Precursor (PE 68)(EC 3,1,1,11)(Pectin methylesterase 68)(AtPME68) [Source:UniProtKB/Swiss-Prot;Acc:Q8LPF3]	-3.86111	-2.20482
AT5G47630	mtACP3	mitochondrial acyl carrier protein 3,[Source:TAIR;Acc:AT5G47630]	-1.90909	-2.5
AT5G47950	AT5G47950	transferase family protein [Source:RefSeq peptide;Acc:NP_199606]	-2.04348	-2.78947
AT5G48430	AT5G48430	Eukaryotic aspartyl protease family protein,[Source:TAIR;Acc:AT5G48430]	-1.67273	-3
AT5G48720	XRI	x-ray induced transcript 1,[Source:TAIR;Acc:AT5G48720]	3.60938	2.47945
AT5G49110	AT5G49110	unknown protein [Source:RefSeq peptide;Acc:NP_001119400]	2.33846	1.92308
AT5G49520	WRKY48	WRKY DNA-binding protein 48,[Source:TAIR;Acc:AT5G49520]	4.15385	2.10169
AT5G50010	AT5G50010	sequence-specific DNA binding transcription factors;transcription regulators,[Source:TAIR;Acc:AT5G50010]	-2.19355	-2.42857
AT5G50740	AT5G50740	Heavy metal transport/detoxification superfamily protein,[Source:TAIR;Acc:AT5G50740]	-2.39416	-2.63462
AT5G50820	anac097	NAC domain containing protein 97,[Source:TAIR;Acc:AT5G50820]	-1.73684	-3.5
AT5G50930	AT5G50930	Histone superfamily protein,[Source:TAIR;Acc:AT5G50930]	3.14286	1.7037
AT5G51780	AT5G51780	basic helix-loop-helix (bHLH) DNA-binding superfamily protein,[Source:TAIR;Acc:AT5G51780]	-2.6875	-4.625
AT5G51920	AT5G51920	Pyridoxal phosphate (PLP)-dependent transferases superfamily protein,[Source:TAIR;Acc:AT5G51920]	3.95455	1.57692
AT5G53250	AGP22	arabinogalactan protein 22,[Source:TAIR;Acc:AT5G53250]	-3.73684	-5.875
AT5G53740	AT5G53740	unknown protein,[Source:TAIR;Acc:AT5G53740]	1.85714	3.01515
AT5G53902	U3B	U3BsnoRNA,[Source:TAIR;Acc:AT5G53902]	2.07143	2.08333
AT5G54070	AT-HSFA9	heat shock transcription factor A9,[Source:TAIR;Acc:AT5G54070]	1.53333	2.38158
AT5G55490	ATGEX1	gamete expressed protein 1,[Source:TAIR;Acc:AT5G55490]	4.42857	1.57143
AT5G56370	AT5G56370	F-box/RNI-like/FBD-like domains-containing protein,[Source:TAIR;Acc:AT5G56370]	1.47727	2.6129
AT5G56540	AGP14	arabinogalactan protein 14,[Source:TAIR;Acc:AT5G56540]	-2.3299	-7.42105
AT5G56810	AT5G56810	F-box/RNI-like/FBD-like domains-containing protein,[Source:TAIR;Acc:AT5G56810]	1.66667	2.43333
AT5G57240	ORP4C	OSBP(oxysterol binding protein)-related protein 4C,[Source:TAIR;Acc:AT5G57240]	2.67883	2.04018
AT5G57340	AT5G57340	unknown protein,[Source:TAIR;Acc:AT5G57340]	4.33333	2.14286
AT5G58010	LRL3	LJRHL1-like 3,[Source:TAIR;Acc:AT5G58010]	-1.64516	-2.58621
AT5G59070	AT5G59070	UDP-Glycosyltransferase superfamily protein,[Source:TAIR;Acc:AT5G59070]	3.66667	2.21429
AT5G59090	ATSBT4,12	subtilase 4,12,[Source:TAIR;Acc:AT5G59090]	-2.41159	-3.71237
AT5G59220	AT5G59220	Probable protein phosphatase 2C 78 (AtPP2C78)(EC 3,1,3,16) [Source:UniProtKB/Swiss-Prot;Acc:Q9FIF5]	-2.01613	-3.96552
AT5G59390	AT5G59390	XH/XS domain-containing protein,[Source:TAIR;Acc:AT5G59390]	2.04348	1.91892
AT5G59680	AT5G59680	Leucine-rich repeat protein kinase family protein,[Source:TAIR;Acc:AT5G59680]	-3	-2.54545
AT5G60250	AT5G60250	zinc finger (C3HC4-type RING finger) family protein [Source:RefSeq peptide;Acc:NP_200833]	5.91444	3.52451
AT5G60490	FLA12	FASCICLIN-like arabinogalactan-protein 12,[Source:TAIR;Acc:AT5G60490]	-1.69231	-2.44444
AT5G60610	AT5G60610	F-box/RNI-like superfamily protein,[Source:TAIR;Acc:AT5G60610]	5	5.45455
AT5G60660	PIP2F	plasma membrane intrinsic protein 2;4,[Source:TAIR;Acc:AT5G60660]	-3.09756	-5.02273
AT5G61070	HDA18	histone deacetylase of the RPD3/HDA1 superfamily 18,[Source:TAIR;Acc:AT5G61070]	4.17647	3.3
AT5G64060	anac103	NAC domain containing protein 103,[Source:TAIR;Acc:AT5G64060]	3.37736	3.86441
AT5G64750	ABR1	Integrase-type DNA-binding superfamily protein,[Source:TAIR;Acc:AT5G64750]	1.42105	2.6
AT5G64910	AT5G64910	unknown protein,[Source:TAIR;Acc:AT5G64910]	3.56667	7.125
AT5G65140	AT5G65140	Haloacid dehalogenase-like hydrolase (HAD) superfamily protein,[Source:TAIR;Acc:AT5G65140]	-2.02632	-2.53333
AT5G66130	ATRAD17	RADIATION SENSITIVE 17,[Source:TAIR;Acc:AT5G66130]	1.96154	1.98667
AT5G66390	AT5G66390	Peroxidase superfamily protein,[Source:TAIR;Acc:AT5G66390]	-2.36242	-2.36975
AT5G66400	RAB18	Dehydrin family protein,[Source:TAIR;Acc:AT5G66400]	-6.75676	-3.11765
AT5G66800	AT5G66800	unknown protein,[Source:TAIR;Acc:AT5G66800]	-5.25	-2
AT5G67430	AT5G67430	Acyl-CoA N-acyltransferases (NAT) superfamily protein,[Source:TAIR;Acc:AT5G67430]	-1.7619	-3.05
AT5G67620	AT5G67620	unknown protein,[Source:TAIR;Acc:AT5G67620]	-2.13333	-2.55556
ATCG00960	RRN4,5S,1	Chloroplast-encoded 4,5S ribosomal RNA, which is a constituent of the 50S large subunit of plastidic ribosome,,[Source:TAIR;Acc:ATCG00960]	1.45455	2.39344

## Sheet: supl table 3 - telomerase
locus	Feature	Description	G2/wt set1	G2/wt set2
AT1G19530	AT1G19530	unknown protein,[Source:TAIR;Acc:AT1G19530]	-2.54902	-6.16393
AT1G21100	AT1G21100	O-methyltransferase family protein,[Source:TAIR;Acc:AT1G21100]	-1.72561	-2.52667
AT1G66100	AT1G66100	Plant thionin,[Source:TAIR;Acc:AT1G66100]	-2.78947	-1.69825
AT2G33830	AT2G33830	Dormancy/auxin associated family protein,[Source:TAIR;Acc:AT2G33830]	-3.66327	-2.72816
AT2G33850	AT2G33850	unknown protein,[Source:TAIR;Acc:AT2G33850]	2.29412	2
AT3G54940	AT3G54940	Papain family cysteine protease,[Source:TAIR;Acc:AT3G54940]	-2.12195	-3.28571
AT3G55710	AT3G55710	UDP-glucoronosyl/UDP-glucosyl transferase family protein [Source:RefSeq peptide;Acc:NP_191130]	-3.14286	-3.92
AT4G07820	AT4G07820	pathogenesis-related protein, putative [Source:RefSeq peptide;Acc:NP_192524]	-5.52381	-3.43333
AT4G13575	AT4G13575	unknown protein,[Source:TAIR;Acc:AT4G13575]	1.52381	2.41176
AT4G30110	HMA2	heavy metal atpase 2,[Source:TAIR;Acc:AT4G30110]	1.30952	1.86486
AT5G09970	CYP78A7	cytochrome P450, family 78, subfamily A, polypeptide 7,[Source:TAIR;Acc:AT5G09970]	1.75	1.68182
AT5G16490	RIC4	ROP-interactive CRIB motif-containing protein 4,[Source:TAIR;Acc:AT5G16490]	-2.10526	-2.16667
AT5G16850	ATTERT	catalytic subunit of telomerase reverse transcriptase	34.5385	32.3333
AT5G16860	AT5G16860	Tetratricopeptide repeat (TPR)-like superfamily protein,[Source:TAIR;Acc:AT5G16860]	2.46753	6.43478
AT5G26270	AT5G26270	unknown protein [Source:RefSeq peptide;Acc:NP_197999]	-2.66393	-4.51667
AT5G39160	AT5G39160	RmlC-like cupins superfamily protein,[Source:TAIR;Acc:AT5G39160]	-3.13636	-4
AT5G39190	GLP2A	germin-like protein 2,[Source:TAIR;Acc:AT5G39190]	-2.70833	-5.57143
AT5G40420	AT5G40420	Oleosin 21,2 kDa (Oleosin type 2) [Source:UniProtKB/Swiss-Prot;Acc:Q39165]	-2.45	-2.39286
AT5G40840	SYN2	Rad21/Rec8-like family protein,[Source:TAIR;Acc:AT5G40840]	1.7381	2.05
AT5G44568	AT5G44568	unknown protein,[Source:TAIR;Acc:AT5G44568]	2.13333	1.64516
AT5G65320	AT5G65320	basic helix-loop-helix (bHLH) DNA-binding superfamily protein,[Source:TAIR;Acc:AT5G65320]	3	1.53846
ATCG00290	TRNS,2	tRNA-Ser,[Source:TAIR;Acc:ATCG00290]	1.32353	3
