# Supplementary material for: Responses to Telomere Erosion in Plants
Source: PLoS One. 2014 Jan 21;9(1):e86220. doi: 10.1371/journal.pone.0086220 (PMC3897657; doi:10.1371/journal.pone.0086220)
Supplement: Table S4 — Lists of genes belonging to the “stress” category. The relative induction is indicated for both RNA-seq experiments. (XLSX) [file pone.0086220.s005.xlsx]

## Sheet: intro
	Supplemental Table 2. List of “Telomere damage” genes.
	Supplemental Table 3. List of “Absence of telomerase” genes.
	Supplemental Table 4. List of “stress” genes.
	Supplemental Table 5. List of “DNA repair and recombination” genes.
	Supplemental Table 6. List of “Cell cycle” genes.
	Supplemental Table 7. List of “PCD- Senescence” genes.
	Supplemental Table 8. List of “mitochondrial” genes.

## Sheet: supl table 4-1 - stress
locus	Feature	Description	G7/wt set1	G7/wt set2
AT4G23220	CRK14	cysteine-rich RLK (RECEPTOR-like protein kinase) 14,[Source:TAIR;Acc:AT4G23220]	4.30936	2.69399
AT1G27760	SAT32	interferon-related developmental regulator family protein / IFRD protein family,[Source:TAIR;Acc:AT1G27760]	3.86498	3.9192
AT5G20230	ATBCB	blue-copper-binding protein,[Source:TAIR;Acc:AT5G20230]	3.50474	0.790955
AT2G30250	WRKY25	WRKY DNA-binding protein 25,[Source:TAIR;Acc:AT2G30250]	2.27061	1.8688
AT3G10930	AT3G10930	unknown protein,[Source:TAIR;Acc:AT3G10930]	2.23317	2.57483
AT1G73500	ATMKK9	MAP kinase kinase 9,[Source:TAIR;Acc:AT1G73500]	2.19329	1.25962
AT4G17490	ATERF6	ethylene responsive element binding factor 6,[Source:TAIR;Acc:AT4G17490]	2.07923	1.12511
AT1G02930	GSTF6	glutathione S-transferase 6,[Source:TAIR;Acc:AT1G02930]	1.89799	1.12866
AT3G50930	BCS1	cytochrome BC1 synthesis,[Source:TAIR;Acc:AT3G50930]	1.86715	3.12959
AT1G25560	TEM1	AP2/B3 transcription factor family protein,[Source:TAIR;Acc:AT1G25560]	1.86108	3.71796
AT1G02920	ATGSTF7	glutathione S-transferase 7,[Source:TAIR;Acc:AT1G02920]	1.85689	1.10974
AT1G61340	AT1G61340	F-box family protein,[Source:TAIR;Acc:AT1G61340]	1.84711	1.66153
AT5G17760	AT5G17760	P-loop containing nucleoside triphosphate hydrolases superfamily protein,[Source:TAIR;Acc:AT5G17760]	1.82743	1.45068
AT2G30360	CIPK11	SOS3-interacting protein 4,[Source:TAIR;Acc:AT2G30360]	1.82374	2.29914
AT3G50760	GATL2	galacturonosyltransferase-like 2,[Source:TAIR;Acc:AT3G50760]	1.77228	2.09564
AT1G67970	AT-HSFA8	heat shock transcription factor A8,[Source:TAIR;Acc:AT1G67970]	1.7691	1.64671
AT3G06500	AT3G06500	Plant neutral invertase family protein,[Source:TAIR;Acc:AT3G06500]	1.70633	0.877354
AT2G36220	AT2G36220	unknown protein,[Source:TAIR;Acc:AT2G36220]	1.68425	0.88804
AT3G57760	AT3G57760	Protein kinase superfamily protein,[Source:TAIR;Acc:AT3G57760]	1.67676	1.57207
AT1G19380	AT1G19380	Protein of unknown function (DUF1195),[Source:TAIR;Acc:AT1G19380]	1.6595	2.0775
AT5G43620	AT5G43620	Pre-mRNA cleavage complex II,[Source:TAIR;Acc:AT5G43620]	1.64177	1.78506
AT2G27830	AT2G27830	unknown protein,[Source:TAIR;Acc:AT2G27830]	1.58029	1.48284
AT1G19180	TIFY10A	jasmonate-zim-domain protein 1,[Source:TAIR;Acc:AT1G19180]	1.55054	1.43992
AT5G62520	SRO5	similar to RCD one 5,[Source:TAIR;Acc:AT5G62520]	1.5227	1.23186
AT4G31800	WRKY18	WRKY DNA-binding protein 18,[Source:TAIR;Acc:AT4G31800]	1.51684	3.21456
AT1G19020	AT1G19020	unknown protein,[Source:TAIR;Acc:AT1G19020]	1.51423	1.16636
AT5G27520	PNC2	peroxisomal adenine nucleotide carrier 2,[Source:TAIR;Acc:AT5G27520]	1.49567	1.16512
AT5G35735	AT5G35735	Auxin-responsive family protein,[Source:TAIR;Acc:AT5G35735]	1.48107	2.26735
AT2G41410	AT2G41410	Calcium-binding EF-hand family protein,[Source:TAIR;Acc:AT2G41410]	1.4731	1.2976
AT5G62520	SRO5	similar to RCD one 5,[Source:TAIR;Acc:AT5G62520]	1.45311	1.35275
AT3G02150	PTF1	plastid transcription factor 1,[Source:TAIR;Acc:AT3G02150]	1.44387	1.00038
AT2G46600	AT2G46600	Calcium-binding EF-hand family protein,[Source:TAIR;Acc:AT2G46600]	1.43829	1.70477
AT2G34930	AT2G34930	disease resistance family protein / LRR family protein,[Source:TAIR;Acc:AT2G34930]	1.43195	1.55265
AT4G18010	IP5PII	myo-inositol polyphosphate 5-phosphatase 2,[Source:TAIR;Acc:AT4G18010]	1.4223	0.95405
AT3G10300	AT3G10300	Calcium-binding EF-hand family protein,[Source:TAIR;Acc:AT3G10300]	1.42221	1.14092
AT4G34710	ADC2	arginine decarboxylase 2,[Source:TAIR;Acc:AT4G34710]	1.4149	1.01852
AT4G14365	XBAT34	XB3 ortholog 4 in Arabidopsis thaliana,[Source:TAIR;Acc:AT4G14365]	1.40722	2.71018
AT1G20100	AT1G20100	unknown protein,[Source:TAIR;Acc:AT1G20100]	1.38935	1.14835
AT2G46600	AT2G46600	Calcium-binding EF-hand family protein,[Source:TAIR;Acc:AT2G46600]	1.34687	1.34168
AT4G17230	AT4G17230	Scarecrow-like protein 13 (AtSCL13)(GRAS family protein 24)(AtGRAS-24) [Source:UniProtKB/Swiss-Prot;Acc:Q9M0M5]	1.34364	1.25213
AT5G51190	AT5G51190	Integrase-type DNA-binding superfamily protein,[Source:TAIR;Acc:AT5G51190]	1.33393	1.59521
AT1G34260	FAB1D	FORMS APLOID AND BINUCLEATE CELLS 1A,[Source:TAIR;Acc:AT1G34260]	1.31113	1.19248
AT2G06530	VPS2,1	SNF7 family protein,[Source:TAIR;Acc:AT2G06530]	1.30991	1.1232
AT5G22250	AT5G22250	Polynucleotidyl transferase, ribonuclease H-like superfamily protein,[Source:TAIR;Acc:AT5G22250]	1.27567	1.61041
AT1G09070	SRC2	soybean gene regulated by cold-2,[Source:TAIR;Acc:AT1G09070]	1.27064	1.17146
AT5G12010	AT5G12010	unknown protein,[Source:TAIR;Acc:AT5G12010]	1.25953	1.23681
AT3G16720	ATL2	TOXICOS EN LEVADURA 2,[Source:TAIR;Acc:AT3G16720]	1.25086	0.80858
AT5G59820	RHL41	C2H2-type zinc finger family protein,[Source:TAIR;Acc:AT5G59820]	1.24996	0.990621
AT1G73030	VPS46,2	SNF7 family protein,[Source:TAIR;Acc:AT1G73030]	1.24609	1.04788
AT4G20830	AT4G20830	FAD-binding Berberine family protein,[Source:TAIR;Acc:AT4G20830]	1.24494	0.966141
AT5G42050	AT5G42050	DCD (Development and Cell Death) domain protein,[Source:TAIR;Acc:AT5G42050]	1.23933	1.6683
AT5G06320	AtPOT1b	Nucleic acid-binding, OB-fold-like protein,[Source:TAIR;Acc:AT5G06310]	1.23874	1.66899
AT3G12400	ELC	Ubiquitin-conjugating enzyme/RWD-like protein,[Source:TAIR;Acc:AT3G12400]	1.22562	1.02207
AT2G38470	WRKY33	WRKY DNA-binding protein 33,[Source:TAIR;Acc:AT2G38470]	1.22022	2.09088
AT2G30040	MAPKKK14	mitogen-activated protein kinase kinase kinase 14,[Source:TAIR;Acc:AT2G30040]	1.21881	0.474426
AT3G04640	AT3G04640	glycine-rich protein,[Source:TAIR;Acc:AT3G04640]	1.21668	0.787748
AT5G52750	AT5G52750	heavy-metal-associated domain-containing protein [Source:RefSeq peptide;Acc:NP_200087]	1.20712	2.5136
AT1G25682	AT1G25682	Family of unknown function (DUF572),[Source:TAIR;Acc:AT1G25682]	1.20349	1.1842
AT1G01650	SPPL4	SIGNAL PEPTIDE PEPTIDASE-LIKE 4,[Source:TAIR;Acc:AT1G01650]	1.20345	1.13532
AT3G06760	AT3G06760	Drought-responsive family protein,[Source:TAIR;Acc:AT3G06760]	1.20301	0.955771
AT5G66070	AT5G66070	RING/U-box superfamily protein,[Source:TAIR;Acc:AT5G66070]	1.20301	1.58002
AT2G24100	AT2G24100	unknown protein,[Source:TAIR;Acc:AT2G24100]	1.19436	1.20511
AT5G47230	AT5G47230	Ethylene-responsive transcription factor 5 (AtERF5)(Ethylene-responsive element-binding factor 5)(EREBP-5) [Source:UniProtKB/Swiss-Prot;Acc:O80341]	1.18812	1.77692
AT5G22000	RHF2A	RING-H2 group F2A,[Source:TAIR;Acc:AT5G22000]	1.1782	1.14216
AT3G56880	AT3G56880	VQ motif-containing protein,[Source:TAIR;Acc:AT3G56880]	1.17535	1.93506
AT1G32920	AT1G32920	unknown protein,[Source:TAIR;Acc:AT1G32920]	1.1723	1.52583
AT3G07790	AT3G07790	DGCR14-related [Source:RefSeq peptide;Acc:NP_187436]	1.16955	1.0377
AT5G19070	AT5G19070	SNARE associated Golgi protein family,[Source:TAIR;Acc:AT5G19070]	1.16202	0.986143
AT5G53570	AT5G53570	Ypt/Rab-GAP domain of gyp1p superfamily protein,[Source:TAIR;Acc:AT5G53570]	1.16099	1.06346
AT5G16200	AT5G16200	50S ribosomal protein-related,[Source:TAIR;Acc:AT5G16200]	1.15173	1.14437
AT4G12040	AT4G12040	A20/AN1-like zinc finger family protein,[Source:TAIR;Acc:AT4G12040]	1.15104	0.930529
AT4G11280	ACS6	1-aminocyclopropane-1-carboxylic acid (acc) synthase 6,[Source:TAIR;Acc:AT4G11280]	1.14898	1.30334
AT4G21560	VPS28-1	vacuolar protein sorting-associated protein 28 homolog 1,[Source:TAIR;Acc:AT4G21560]	1.13654	1.108
AT4G29950	AT4G29950	Ypt/Rab-GAP domain of gyp1p superfamily protein,[Source:TAIR;Acc:AT4G29950]	1.13411	1.00622
AT3G49530	ANAC062	NAC domain containing protein 62,[Source:TAIR;Acc:AT3G49530]	1.13245	1.27616
AT2G22500	UCP5	uncoupling protein 5,[Source:TAIR;Acc:AT2G22500]	1.12683	1.10303
AT5G49280	AT5G49280	hydroxyproline-rich glycoprotein family protein,[Source:TAIR;Acc:AT5G49280]	1.12175	1.19029
AT5G54940	AT5G54940	Translation initiation factor SUI1 family protein,[Source:TAIR;Acc:AT5G54940]	1.12086	1.50789
AT3G60420	AT3G60420	Phosphoglycerate mutase family protein,[Source:TAIR;Acc:AT3G60420]	1.11935	0.786356
AT5G58620	AT5G58620	zinc finger (CCCH-type) family protein,[Source:TAIR;Acc:AT5G58620]	1.11052	1.04673
AT2G36220	AT2G36220	unknown protein,[Source:TAIR;Acc:AT2G36220]	1.10986	1.07146
AT5G13160	PBS1	Protein kinase superfamily protein,[Source:TAIR;Acc:AT5G13160]	1.10737	1.09621
AT5G26030	FC1	ferrochelatase 1,[Source:TAIR;Acc:AT5G26030]	1.10306	1.1774
AT5G48655	AT5G48655	RING/U-box superfamily protein,[Source:TAIR;Acc:AT5G48655]	1.09967	1.17765
AT1G01550	BPS1	Protein of unknown function (DUF793),[Source:TAIR;Acc:AT1G01550]	1.09623	1.08972
AT5G13200	AT5G13200	GRAM domain family protein,[Source:TAIR;Acc:AT5G13200]	1.08921	1.16215
AT3G47420	ATPS3	phosphate starvation-induced gene 3,[Source:TAIR;Acc:AT3G47420]	1.08782	1.27581
AT4G35985	AT4G35985	Senescence/dehydration-associated protein-related,[Source:TAIR;Acc:AT4G35985]	1.08648	1.43161
AT5G16910	ATCSLD2	cellulose-synthase like D2,[Source:TAIR;Acc:AT5G16910]	1.0723	0.94809
AT3G62260	AT3G62260	Protein phosphatase 2C family protein,[Source:TAIR;Acc:AT3G62260]	1.06931	1.04827
AT3G55430	AT3G55430	O-Glycosyl hydrolases family 17 protein,[Source:TAIR;Acc:AT3G55430]	1.0663	0.897222
AT3G01820	AT3G01820	P-loop containing nucleoside triphosphate hydrolases superfamily protein,[Source:TAIR;Acc:AT3G01820]	1.06612	0.99671
AT4G02880	AT4G02880	unknown protein,[Source:TAIR;Acc:AT4G02880]	1.05632	1.11912
AT4G27652	AT4G27652	unknown protein,[Source:TAIR;Acc:AT4G27652]	1.04944	0.907851
AT2G28400	AT2G28400	Protein of unknown function, DUF584,[Source:TAIR;Acc:AT2G28400]	1.04318	2.03447
AT4G29950	AT4G29950	Ypt/Rab-GAP domain of gyp1p superfamily protein,[Source:TAIR;Acc:AT4G29950]	1.04274	1.57085
AT3G27880	AT3G27880	Protein of unknown function (DUF1645),[Source:TAIR;Acc:AT3G27880]	1.04097	0.825876
AT5G64260	EXL2	EXORDIUM like 2,[Source:TAIR;Acc:AT5G64260]	1.03571	0.876184
AT4G27940	ATMTM1	manganese tracking factor for mitochondrial SOD2,[Source:TAIR;Acc:AT4G27940]	1.03393	0.918438
AT1G55110	AtIDD7	indeterminate(ID)-domain 7,[Source:TAIR;Acc:AT1G55110]	1.03378	1.20257
AT4G11300	AT4G11300	Protein of unknown function (DUF793),[Source:TAIR;Acc:AT4G11300]	1.03312	0.994595
AT4G24570	DIC2	dicarboxylate carrier 2,[Source:TAIR;Acc:AT4G24570]	1.0261	1.13531
AT2G27080	AT2G27080	Late embryogenesis abundant (LEA) hydroxyproline-rich glycoprotein family,[Source:TAIR;Acc:AT2G27080]	1.0261	1.098
AT5G10695	AT5G10695	unknown protein [Source:RefSeq peptide;Acc:NP_568234]	1.02609	1.31034
AT1G02660	AT1G02660	alpha/beta-Hydrolases superfamily protein,[Source:TAIR;Acc:AT1G02660]	1.02152	3.55053
AT1G29340	PUB17	plant U-box 17,[Source:TAIR;Acc:AT1G29340]	1.01454	1.14339
AT3G63490	AT3G63490	Ribosomal protein L1p/L10e family,[Source:TAIR;Acc:AT3G63490]	1.01344	0.881868
AT1G25400	AT1G25400	unknown protein,[Source:TAIR;Acc:AT1G25400]	1.01124	1.86106
AT2G46620	AT2G46620	P-loop containing nucleoside triphosphate hydrolases superfamily protein,[Source:TAIR;Acc:AT2G46620]	1.00901	1.158
AT4G30350	AT4G30350	Double Clp-N motif-containing P-loop nucleoside triphosphate hydrolases superfamily protein,[Source:TAIR;Acc:AT4G30350]	1.00761	0.974013
AT4G37260	AT4G37260	MYB73 (MYB DOMAIN PROTEIN 73); DNA binding / transcription factor [Source:RefSeq peptide;Acc:NP_195443]	1.00707	1.38024
AT5G26030	FC1	ferrochelatase 1,[Source:TAIR;Acc:AT5G26030]	1.00457	1.03666
AT1G74450	AT1G74450	Protein of unknown function (DUF793),[Source:TAIR;Acc:AT1G74450]	0.999336	1.41473
AT4G22592	CPuORF27	conserved peptide upstream open reading frame 27,[Source:TAIR;Acc:AT4G22592]	0.998172	1.12467
AT5G24590	ANAC091	TCV-interacting protein,[Source:TAIR;Acc:AT5G24590]	0.99158	1.34006
AT3G05580	AT3G05580	Calcineurin-like metallo-phosphoesterase superfamily protein,[Source:TAIR;Acc:AT3G05580]	0.989004	1.13182
AT3G05500	AT3G05500	Rubber elongation factor protein (REF),[Source:TAIR;Acc:AT3G05500]	0.98647	1.12778
AT5G41810	AT5G41810	unknown protein,[Source:TAIR;Acc:AT5G41810]	0.982614	1.08459
AT5G62460	AT5G62460	RING/FYVE/PHD zinc finger superfamily protein,[Source:TAIR;Acc:AT5G62460]	0.981847	0.945682
AT1G23710	AT1G23710	Protein of unknown function (DUF1645),[Source:TAIR;Acc:AT1G23710]	0.979268	1.26131
AT4G30210	ATR2	P450 reductase 2,[Source:TAIR;Acc:AT4G30210]	0.974945	0.949893
AT4G27350	AT4G27350	unknown protein [Source:RefSeq peptide;Acc:NP_194465]	0.97004	1.28099
AT3G14050	RSH2	RELA/SPOT homolog 2,[Source:TAIR;Acc:AT3G14050]	0.967463	1.52367
AT2G27260	AT2G27260	Late embryogenesis abundant (LEA) hydroxyproline-rich glycoprotein family,[Source:TAIR;Acc:AT2G27260]	0.961739	0.985837
AT5G62570	AT5G62570	Calmodulin binding protein-like,[Source:TAIR;Acc:AT5G62570]	0.960915	1.10918
AT5G23850	AT5G23850	Arabidopsis thaliana protein of unknown function (DUF821),[Source:TAIR;Acc:AT5G23850]	0.955326	1.35198
AT5G67300	ATMYBR1	myb domain protein r1,[Source:TAIR;Acc:AT5G67300]	0.951214	1.2049
AT5G59550	AT5G59550	zinc finger (C3HC4-type RING finger) family protein,[Source:TAIR;Acc:AT5G59550]	0.95079	0.975964
AT4G02410	AT4G02410	Concanavalin A-like lectin protein kinase family protein,[Source:TAIR;Acc:AT4G02410]	0.94717	1.55938
AT3G08710	ATH9	thioredoxin H-type 9,[Source:TAIR;Acc:AT3G08710]	0.930897	0.808944
AT1G28200	FIP1	FH interacting protein 1,[Source:TAIR;Acc:AT1G28200]	0.930753	1.09838
AT5G67250	SKIP2	SKP1/ASK1-interacting protein 2,[Source:TAIR;Acc:AT5G67250]	0.927704	0.955366
AT1G30640	AT1G30640	Protein kinase family protein,[Source:TAIR;Acc:AT1G30640]	0.925844	1.34706
AT3G52800	AT3G52800	A20/AN1-like zinc finger family protein,[Source:TAIR;Acc:AT3G52800]	0.918136	1.04113
AT2G33700	AT2G33700	Protein phosphatase 2C family protein,[Source:TAIR;Acc:AT2G33700]	0.912797	1.19412
AT4G33920	AT4G33920	Protein phosphatase 2C family protein,[Source:TAIR;Acc:AT4G33920]	0.907897	1.17928
AT5G66210	CPK28	calcium-dependent protein kinase 28,[Source:TAIR;Acc:AT5G66210]	0.903993	1.03278
AT3G19580	AZF2	zinc-finger protein 2,[Source:TAIR;Acc:AT3G19580]	0.903947	1.52583
AT3G57530	CPK32	calcium-dependent protein kinase 32,[Source:TAIR;Acc:AT3G57530]	0.901476	1.25343
AT3G55980	SZF1	salt-inducible zinc finger 1,[Source:TAIR;Acc:AT3G55980]	0.890652	1.62593
AT3G02140	TMAC2	AFP2 (ABI five-binding protein 2) family protein,[Source:TAIR;Acc:AT3G02140]	0.888087	0.79691
AT5G16830	HSF3	heat shock factor 3,[Source:TAIR;Acc:AT5G16820]	0.887536	0.956671
AT2G40140	CZF1	zinc finger (CCCH-type) family protein,[Source:TAIR;Acc:AT2G40140]	0.886857	1.15838
AT4G35480	RHA3B	RING-H2 finger A3B,[Source:TAIR;Acc:AT4G35480]	0.883554	1.5739
AT5G62020	AT-HSFB2A	heat shock transcription factor B2A,[Source:TAIR;Acc:AT5G62020]	0.876456	1.12529
AT1G27730	STZ	salt tolerance zinc finger,[Source:TAIR;Acc:AT1G27730]	0.874695	1.10776
AT3G55640	AT3G55640	Mitochondrial substrate carrier family protein,[Source:TAIR;Acc:AT3G55640]	0.873272	1.05546
AT2G27500	AT2G27500	Glycosyl hydrolase superfamily protein,[Source:TAIR;Acc:AT2G27500]	0.868236	1.20653
AT4G32020	AT4G32020	unknown protein,[Source:TAIR;Acc:AT4G32020]	0.865723	0.933409
AT5G11650	AT5G11650	hydrolase, alpha/beta fold family protein [Source:RefSeq peptide;Acc:NP_196726]	0.864807	0.823963
AT4G37790	HAT22	Homeobox-leucine zipper protein family,[Source:TAIR;Acc:AT4G37790]	0.862318	0.979557
AT4G18880	AT-HSFA4A	heat shock transcription factor A4A,[Source:TAIR;Acc:AT4G18880]	0.850906	2.06247
AT3G50260	CEJ1	cooperatively regulated by ethylene and jasmonate 1,[Source:TAIR;Acc:AT3G50260]	0.849208	0.98323
AT4G11330	ATMPK5	MAP kinase 5,[Source:TAIR;Acc:AT4G11330]	0.845841	0.923984
AT1G27100	AT1G27100	Actin cross-linking protein,[Source:TAIR;Acc:AT1G27100]	0.826691	1.31092
AT5G04340	AT5G04340	ZAT6 (ZINC FINGER OF ARABIDOPSIS THALIANA 6); nucleic acid binding / transcription factor/ zinc ion binding [Source:RefSeq peptide;Acc:NP_196054]	0.825343	0.957109
AT3G61190	BAP1	BON association protein 1,[Source:TAIR;Acc:AT3G61190]	0.820868	0.957123
AT5G63790	SHA1	RING/FYVE/PHD zinc finger superfamily protein,[Source:TAIR;Acc:AT5G63780]	0.81226	1.19094
AT2G03240	AT2G03240	EXS (ERD1/XPR1/SYG1) family protein,[Source:TAIR;Acc:AT2G03240]	0.80682	0.920474
AT3G46620	AT3G46620	zinc finger (C3HC4-type RING finger) family protein,[Source:TAIR;Acc:AT3G46620]	0.80579	0.894656
AT3G15210	ATERF-4	ethylene responsive element binding factor 4,[Source:TAIR;Acc:AT3G15210]	0.805771	0.777831
AT5G47120	ATBI-1	BAX inhibitor 1,[Source:TAIR;Acc:AT5G47120]	0.803442	1.3315
AT5G64310	AGP1	arabinogalactan protein 1,[Source:TAIR;Acc:AT5G64310]	0.802889	0.928996
AT5G66650	AT5G66650	Protein of unknown function (DUF607),[Source:TAIR;Acc:AT5G66650]	0.801453	0.902717
AT1G18740	AT1G18740	Protein of unknown function (DUF793),[Source:TAIR;Acc:AT1G18740]	0.794068	0.979346
AT4G05050	UBQ11	ubiquitin 11,[Source:TAIR;Acc:AT4G05050]	0.790043	0.994319
AT1G80840	WRKY40	WRKY DNA-binding protein 40,[Source:TAIR;Acc:AT1G80840]	0.781805	2.12701
AT5G26340	AT5G26340	Sugar transport protein 13 (Hexose transporter 13)(Multicopy suppressor of snf4 deficiency protein 1) [Source:UniProtKB/Swiss-Prot;Acc:Q94AZ2]	0.774086	1.25186
AT4G02880	AT4G02880	unknown protein,[Source:TAIR;Acc:AT4G02880]	0.757522	1.0527
AT4G05020	NDB2	NAD(P)H dehydrogenase B2,[Source:TAIR;Acc:AT4G05020]	0.750619	0.884272
AT4G34150	AT4G34150	Calcium-dependent lipid-binding (CaLB domain) family protein,[Source:TAIR;Acc:AT4G34150]	0.738467	1.13255
AT4G31550	WRKY11	WRKY DNA-binding protein 11,[Source:TAIR;Acc:AT4G31550]	0.737751	1.65234
AT3G03440	AT3G03440	ARM repeat superfamily protein,[Source:TAIR;Acc:AT3G03440]	0.719798	1.0271
AT1G76130	ATAMY2	alpha-amylase-like 2,[Source:TAIR;Acc:AT1G76130]	0.706864	0.716936
AT4G29780	AT4G29780	unknown protein,[Source:TAIR;Acc:AT4G29780]	0.696874	1.429
AT1G73540	atnudt21	nudix hydrolase homolog 21,[Source:TAIR;Acc:AT1G73540]	0.66728	0.970087
AT1G80840	WRKY40	WRKY DNA-binding protein 40,[Source:TAIR;Acc:AT1G80840]	0.644438	1.24282
AT1G02400	ATGA2OX4	gibberellin 2-oxidase 6,[Source:TAIR;Acc:AT1G02400]	0.637836	0.937299
AT2G16720	MYB7	myb domain protein 7,[Source:TAIR;Acc:AT2G16720]	0.598926	1.0378
AT2G38470	WRKY33	WRKY DNA-binding protein 33,[Source:TAIR;Acc:AT2G38470]	0.576523	1.12696
AT5G45340	CYP707A3	cytochrome P450, family 707, subfamily A, polypeptide 3,[Source:TAIR;Acc:AT5G45340]	0.561899	2.0559
AT3G04010	AT3G04010	O-Glycosyl hydrolases family 17 protein,[Source:TAIR;Acc:AT3G04010]	0.544842	0.50106
AT5G22630	ADT5	arogenate dehydratase 5,[Source:TAIR;Acc:AT5G22630]	0.537903	0.819629
AT3G48520	CYP94B3	cytochrome P450, family 94, subfamily B, polypeptide 3,[Source:TAIR;Acc:AT3G48520]	0.523975	0.658347
AT5G65140	AT5G65140	Haloacid dehalogenase-like hydrolase (HAD) superfamily protein,[Source:TAIR;Acc:AT5G65140]	0.405048	0.524831
AT2G22860	ATPSK2	phytosulfokine 2 precursor,[Source:TAIR;Acc:AT2G22860]	0.391685	1.63598

## Sheet: supl table 4-2 - stress
Locus	Gene Model(s)	GO term (GO ID)		GO Slim
AT1G05260	AT1G05260	cellular response to iron ion starvation	GO:0010106	other cellular processes | response to stress
	AT1G05260	hyperosmotic salinity response	GO:0042538	response to abiotic or biotic stimulus | response to stress
	AT1G05260.1	response to oxidative stress	GO:0006979	response to stress
	AT1G05260	response to cold	GO:0009409	response to stress | response to abiotic or biotic stimulus
	AT1G05260	response to desiccation	GO:0009269	response to stress | response to abiotic or biotic stimulus
AT1G09080	AT1G09080	response to heat	GO:0009408	response to abiotic or biotic stimulus | response to stress
	AT1G09080	response to hydrogen peroxide	GO:0042542	response to stress
	AT1G09080	response to endoplasmic reticulum stress	GO:0034976	response to stress | other cellular processes
	AT1G09080	response to heat	GO:0009408	response to stress | response to abiotic or biotic stimulus
AT1G14540	AT1G14540	cellular response to hypoxia	GO:0071456	other cellular processes | response to abiotic or biotic stimulus | response to stress
	AT1G14540.1	response to oxidative stress	GO:0006979	response to stress
AT1G19380	AT1G19380	response to wounding	GO:0009611	response to stress
AT1G19610	AT1G19610.1	defense response	GO:0006952	response to stress
	AT1G19610	defense response	GO:0006952	response to stress
	AT1G19610	defense response	GO:0006952	response to stress
AT1G20440	AT1G20440	hyperosmotic response	GO:0006972	response to abiotic or biotic stimulus | response to stress
	AT1G20440	response to cold	GO:0009409	response to abiotic or biotic stimulus | response to stress
	AT1G20440	cold acclimation	GO:0009631	response to abiotic or biotic stimulus | response to stress
	AT1G20440	heat acclimation	GO:0010286	response to abiotic or biotic stimulus | response to stress
	AT1G20440	response to water deprivation	GO:0009414	response to stress | response to abiotic or biotic stimulus
	AT1G20440	response to salt stress	GO:0009651	response to stress | response to abiotic or biotic stimulus
	AT1G20440	response to osmotic stress	GO:0006970	response to stress | response to abiotic or biotic stimulus
	AT1G20440	cold acclimation	GO:0009631	response to stress | response to abiotic or biotic stimulus
	AT1G20440	heat acclimation	GO:0010286	response to stress | response to abiotic or biotic stimulus
	AT1G20440	defense response to fungus	GO:0050832	response to stress | response to abiotic or biotic stimulus
	AT1G20440	response to cold	GO:0009409	response to stress | response to abiotic or biotic stimulus
AT1G20620	AT1G20620	cellular response to nitrogen starvation	GO:0006995	other cellular processes | response to stress
	AT1G20620	cellular response to phosphate starvation	GO:0016036	other cellular processes | response to stress
	AT1G20620	hydrogen peroxide catabolic process	GO:0042744	other metabolic processes | other cellular processes | response to stress
	AT1G20620	response to cold	GO:0009409	response to abiotic or biotic stimulus | response to stress
	AT1G20620	regulation of defense response	GO:0031347	response to stress
	AT1G20620	cellular response to nitrogen starvation	GO:0006995	response to stress | other cellular processes
	AT1G20620	cellular response to sulfate starvation	GO:0009970	response to stress | other cellular processes
	AT1G20620	hydrogen peroxide catabolic process	GO:0042744	response to stress | other cellular processes | other metabolic processes
	AT1G20620	systemic acquired resistance	GO:0009627	response to stress | response to abiotic or biotic stimulus
AT1G27760	AT1G27760	response to salt stress	GO:0009651	response to abiotic or biotic stimulus | response to stress
AT1G32450	AT1G32450	cellular response to iron ion starvation	GO:0010106	other cellular processes | response to stress
AT1G32583	AT1G32583	response to heat	GO:0009408	response to stress | response to abiotic or biotic stimulus
AT1G53540	AT1G53540	response to heat	GO:0009408	response to abiotic or biotic stimulus | response to stress
	AT1G53540	response to hydrogen peroxide	GO:0042542	response to stress
	AT1G53540	response to endoplasmic reticulum stress	GO:0034976	response to stress | other cellular processes
	AT1G53540	response to heat	GO:0009408	response to stress | response to abiotic or biotic stimulus
AT1G56600	AT1G56600	response to oxidative stress	GO:0006979	response to stress
	AT1G56600	response to water deprivation	GO:0009414	response to stress | response to abiotic or biotic stimulus
	AT1G56600	response to salt stress	GO:0009651	response to stress | response to abiotic or biotic stimulus
	AT1G56600	response to cold	GO:0009409	response to stress | response to abiotic or biotic stimulus
	AT1G56600	response to water deprivation	GO:0009414	response to stress | response to abiotic or biotic stimulus
	AT1G56600	response to salt stress	GO:0009651	response to stress | response to abiotic or biotic stimulus
AT1G63750	AT1G63750.3	defense response	GO:0006952	response to stress
	AT1G63750	defense response	GO:0006952	response to stress
	AT1G63750.1	defense response	GO:0006952	response to stress
	AT1G63750.2	defense response	GO:0006952	response to stress
AT1G66280	AT1G66280	cellular response to cold	GO:0070417	other cellular processes | response to stress | response to abiotic or biotic stimulus
	AT1G66280	cellular response to salt stress	GO:0071472	response to abiotic or biotic stimulus | other cellular processes | response to stress
	AT1G66280.1	response to salt stress	GO:0009651	response to abiotic or biotic stimulus | response to stress
AT1G70850	AT1G70850.2	defense response	GO:0006952	response to stress
	AT1G70850.1	defense response	GO:0006952	response to stress
	AT1G70850.3	defense response	GO:0006952	response to stress
AT1G70890	AT1G70890.1	defense response	GO:0006952	response to stress
AT1G71030	AT1G71030	response to salt stress	GO:0009651	response to abiotic or biotic stimulus | response to stress
AT1G72520	AT1G72520	response to ozone	GO:0010193	response to stress
	AT1G72520	response to wounding	GO:0009611	response to stress
	AT1G72520	defense response by callose deposition	GO:0052542	response to stress
	AT1G72520	response to wounding	GO:0009611	response to stress
	AT1G72520	response to wounding	GO:0009611	response to stress
	AT1G72520	defense response	GO:0006952	response to stress
AT1G73330	AT1G73330	response to water deprivation	GO:0009414	response to abiotic or biotic stimulus | response to stress
AT1G80340	AT1G80340	response to freezing	GO:0050826	response to abiotic or biotic stimulus | response to stress
AT2G01520	AT2G01520.1	defense response	GO:0006952	response to stress
AT2G04800	AT2G04800	cellular response to iron ion starvation	GO:0010106	other cellular processes | response to stress
AT2G15890	AT2G15890	defense response to fungus	GO:0050832	response to stress | response to abiotic or biotic stimulus
AT2G17040	AT2G17040	defense response, incompatible interaction	GO:0009814	response to stress | response to abiotic or biotic stimulus
AT2G18600	AT2G18600	postreplication repair	GO:0006301	DNA or RNA metabolism | other cellular processes | response to stress
AT2G22330	AT2G22330	defense response by callose deposition in cell wall	GO:0052544	other cellular processes | cell organization and biogenesis | response to stress
	AT2G22330	defense response to oomycetes	GO:0002229	response to abiotic or biotic stimulus | response to stress
	AT2G22330	response to wounding	GO:0009611	response to stress
	AT2G22330	defense response	GO:0006952	response to stress
	AT2G22330	defense response to bacterium	GO:0042742	response to stress | response to abiotic or biotic stimulus
	AT2G22330	induced systemic resistance	GO:0009682	response to stress | response to abiotic or biotic stimulus
	AT2G22330	regulation of systemic acquired resistance	GO:0010112	response to stress | response to abiotic or biotic stimulus
	AT2G22330	defense response to bacterium	GO:0042742	response to stress | response to abiotic or biotic stimulus
AT2G29130	AT2G29130	response to water deprivation	GO:0009414	response to abiotic or biotic stimulus | response to stress
	AT2G29130	response to water deprivation	GO:0009414	response to abiotic or biotic stimulus | response to stress
AT2G30250	AT2G30250	cellular heat acclimation	GO:0070370	other cellular processes | response to abiotic or biotic stimulus | response to stress
	AT2G30250	regulation of plant-type hypersensitive response	GO:0010363	other cellular processes | response to stress
	AT2G30250	cellular response to heat	GO:0034605	response to abiotic or biotic stimulus | other cellular processes | response to stress
	AT2G30250	response to osmotic stress	GO:0006970	response to abiotic or biotic stimulus | response to stress
	AT2G30250	negative regulation of defense response	GO:0031348	response to stress
	AT2G30250	response to cold	GO:0009409	response to stress | response to abiotic or biotic stimulus
	AT2G30250	heat acclimation	GO:0010286	response to stress | response to abiotic or biotic stimulus
	AT2G30250	response to salt stress	GO:0009651	response to stress | response to abiotic or biotic stimulus
AT2G35980	AT2G35980	defense response to bacterium	GO:0042742	response to abiotic or biotic stimulus | response to stress
	AT2G35980	defense response to virus	GO:0051607	response to abiotic or biotic stimulus | response to stress
	AT2G35980	negative regulation of defense response	GO:0031348	response to stress
	AT2G35980	regulation of plant-type hypersensitive response	GO:0010363	response to stress | other cellular processes
	AT2G35980	respiratory burst involved in defense response	GO:0002679	response to stress | other metabolic processes
	AT2G35980	defense response to fungus	GO:0050832	response to stress | response to abiotic or biotic stimulus
	AT2G35980	systemic acquired resistance, salicylic acid mediated signaling pathway	GO:0009862	response to stress | signal transduction | other cellular processes | response to abiotic or biotic stimulus
AT2G38390	AT2G38390.1	response to oxidative stress	GO:0006979	response to stress
	AT2G38390.1	response to salt stress	GO:0009651	response to stress | response to abiotic or biotic stimulus
	AT2G38530	response to water deprivation	GO:0009414	response to abiotic or biotic stimulus | response to stress
AT2G39040	AT2G39040.1	response to oxidative stress	GO:0006979	response to stress
AT2G39110	AT2G39110	cellular response to iron ion starvation	GO:0010106	response to stress | other cellular processes
AT2G40000	AT2G40000	defense response to bacterium, incompatible interaction	GO:0009816	response to abiotic or biotic stimulus | response to stress
	AT2G40000	response to oxidative stress	GO:0006979	response to stress
AT2G40170	AT2G40170	response to freezing	GO:0050826	response to stress | response to abiotic or biotic stimulus
AT2G47890	AT2G47890	response to wounding	GO:0009611	response to stress
AT2G48130	AT2G48130	cellular response to iron ion starvation	GO:0010106	other cellular processes | response to stress
AT3G01190	AT3G01190.1	response to oxidative stress	GO:0006979	response to stress
	AT3G01190	cellular response to iron ion starvation	GO:0010106	response to stress | other cellular processes
AT3G01260	AT3G01260	cellular response to iron ion starvation	GO:0010106	response to stress | other cellular processes
AT3G02840	AT3G02840	defense response to fungus	GO:0050832	response to abiotic or biotic stimulus | response to stress
	AT3G02840	defense response by callose deposition	GO:0052542	response to stress
	AT3G02840	response to ozone	GO:0010193	response to stress
	AT3G02840	regulation of plant-type hypersensitive response	GO:0010363	response to stress | other cellular processes
	AT3G02840	endoplasmic reticulum unfolded protein response	GO:0030968	response to stress | signal transduction | other cellular processes
AT3G05890	AT3G05890	response to cold	GO:0009409	response to abiotic or biotic stimulus | response to stress
AT3G08770	AT3G08770	response to water deprivation	GO:0009414	response to stress | response to abiotic or biotic stimulus
AT3G10930	AT3G10930	response to wounding	GO:0009611	response to stress
AT3G11340	AT3G11340	defense response to fungus	GO:0050832	response to abiotic or biotic stimulus | response to stress
	AT3G11340	defense response	GO:0006952	response to stress
AT3G22570	AT3G22570	cellular response to iron ion starvation	GO:0010106	other cellular processes | response to stress
AT3G22640	AT3G22640	response to freezing	GO:0050826	response to stress | response to abiotic or biotic stimulus
AT3G25190	AT3G25190	cellular response to nitric oxide	GO:0071732	other cellular processes | response to stress
AT3G25710	AT3G25710	cellular response to phosphate starvation	GO:0016036	response to stress | other cellular processes
AT3G27150	AT3G27150	cellular response to iron ion starvation	GO:0010106	response to stress | other cellular processes
AT3G32920	AT3G32920.2	DNA repair	GO:0006281	DNA or RNA metabolism | response to stress | other cellular processes
	AT3G32920	DNA repair	GO:0006281	DNA or RNA metabolism | response to stress | other cellular processes
	AT3G32920.1	DNA repair	GO:0006281	other cellular processes | DNA or RNA metabolism | response to stress
	AT3G32920.1	SOS response	GO:0009432	other cellular processes | response to stress
	AT3G32920	SOS response	GO:0009432	other cellular processes | response to stress
	AT3G32920.2	SOS response	GO:0009432	response to stress | other cellular processes
AT3G43190	AT3G43190	response to hypoxia	GO:0001666	response to stress | response to abiotic or biotic stimulus
	AT3G43190	response to hypoxia	GO:0001666	response to stress | response to abiotic or biotic stimulus
	AT3G43190	systemic acquired resistance, salicylic acid mediated signaling pathway	GO:0009862	signal transduction | response to stress | response to abiotic or biotic stimulus | other cellular processes
AT3G45710	AT3G45710	cellular response to iron ion starvation	GO:0010106	response to stress | other cellular processes
AT3G46230	AT3G46230	response to heat	GO:0009408	response to abiotic or biotic stimulus | response to stress
AT3G47380	AT3G47380	regulation of plant-type hypersensitive response	GO:0010363	other cellular processes | response to stress
	AT3G47380	negative regulation of defense response	GO:0031348	response to stress
	AT3G47380	regulation of innate immune response	GO:0045088	response to stress
	AT3G47380	defense response to fungus	GO:0050832	response to stress | response to abiotic or biotic stimulus
	AT3G47380	defense response to bacterium	GO:0042742	response to stress | response to abiotic or biotic stimulus
	AT3G47380	systemic acquired resistance, salicylic acid mediated signaling pathway	GO:0009862	response to stress | signal transduction | response to abiotic or biotic stimulus | other cellular processes
AT3G50930	AT3G50930	systemic acquired resistance	GO:0009627	response to abiotic or biotic stimulus | response to stress
	AT3G50930	defense response by callose deposition	GO:0052542	response to stress
	AT3G50930	response to wounding	GO:0009611	response to stress
AT3G50970	AT3G50970	heat acclimation	GO:0010286	response to abiotic or biotic stimulus | response to stress
	AT3G50970	response to water deprivation	GO:0009414	response to abiotic or biotic stimulus | response to stress
	AT3G50970	response to cold	GO:0009409	response to stress | response to abiotic or biotic stimulus
	AT3G50970	cold acclimation	GO:0009631	response to stress | response to abiotic or biotic stimulus
	AT3G50970	response to cold	GO:0009409	response to stress | response to abiotic or biotic stimulus
	AT3G50970	response to water deprivation	GO:0009414	response to stress | response to abiotic or biotic stimulus
	AT3G50970	defense response to fungus	GO:0050832	response to stress | response to abiotic or biotic stimulus
AT3G51810	AT3G51810	response to freezing	GO:0050826	response to stress | response to abiotic or biotic stimulus
AT3G55230	AT3G55230	defense response	GO:0006952	response to stress
AT4G02330	AT4G02330	response to cold	GO:0009409	response to stress | response to abiotic or biotic stimulus
AT4G02390	AT4G02390	double-strand break repair	GO:0006302	response to stress | other cellular processes | DNA or RNA metabolism
AT4G10310	AT4G10310	response to salt stress	GO:0009651	response to abiotic or biotic stimulus | response to stress
	AT4G10310	response to osmotic stress	GO:0006970	response to abiotic or biotic stimulus | response to stress
	AT4G10310	response to salt stress	GO:0009651	response to stress | response to abiotic or biotic stimulus
AT4G11290	AT4G11290.1	response to oxidative stress	GO:0006979	response to stress
AT4G17270	AT4G17270	response to misfolded protein	GO:0051788	response to stress
AT4G21070	AT4G21070	DNA repair	GO:0006281	DNA or RNA metabolism | other cellular processes | response to stress
	AT4G21070	DNA repair	GO:0006281	other cellular processes | DNA or RNA metabolism | response to stress
	AT4G21070	double-strand break repair	GO:0006302	other cellular processes | response to stress | DNA or RNA metabolism
	AT4G21070.1	DNA repair	GO:0006281	response to stress | DNA or RNA metabolism | other cellular processes
AT4G22212	AT4G22212.1	defense response	GO:0006952	response to stress
AT4G23220	AT4G23220	systemic acquired resistance	GO:0009627	response to stress | response to abiotic or biotic stimulus
AT4G23600	AT4G23600	response to wounding	GO:0009611	response to stress
	AT4G23600	response to wounding	GO:0009611	response to stress
	AT4G23600	hyperosmotic salinity response	GO:0042538	response to stress | response to abiotic or biotic stimulus
AT4G31877	AT4G31877	cellular response to phosphate starvation	GO:0016036	response to stress | other cellular processes
AT4G36430	AT4G36430.1	response to oxidative stress	GO:0006979	response to stress
AT4G37370	AT4G37370	heat acclimation	GO:0010286	response to stress | response to abiotic or biotic stimulus
AT4G37490	AT4G37490	double-strand break repair	GO:0006302	DNA or RNA metabolism | response to stress | other cellular processes
AT4G38780	AT4G38780	telomere maintenance in response to DNA damage	GO:0043247	cell organization and biogenesis | response to stress | DNA or RNA metabolism | other cellular processes
AT4G39830	AT4G39830	systemic acquired resistance	GO:0009627	response to stress | response to abiotic or biotic stimulus
AT5G03780	AT5G03780	double-strand break repair	GO:0006302	other cellular processes | response to stress | DNA or RNA metabolism
AT5G06720	AT5G06720	defense response to nematode	GO:0002215	response to abiotic or biotic stimulus | response to stress
	AT5G06720.1	response to oxidative stress	GO:0006979	response to stress
AT5G06760	AT5G06760	response to water deprivation	GO:0009414	response to abiotic or biotic stimulus | response to stress
	AT5G06760	response to osmotic stress	GO:0006970	response to stress | response to abiotic or biotic stimulus
	AT5G06760	response to cold	GO:0009409	response to stress | response to abiotic or biotic stimulus
AT5G06870	AT5G06870	defense response	GO:0006952	response to stress
	AT5G06870	negative regulation of defense response	GO:0031348	response to stress
	AT5G06870	regulation of plant-type hypersensitive response	GO:0010363	response to stress | other cellular processes
	AT5G06870	systemic acquired resistance, salicylic acid mediated signaling pathway	GO:0009862	response to stress | response to abiotic or biotic stimulus | signal transduction | other cellular processes
AT5G07330	AT5G07330	response to hydrogen peroxide	GO:0042542	response to stress
	AT5G07330	response to heat	GO:0009408	response to stress | response to abiotic or biotic stimulus
AT5G07690	AT5G07690	cellular response to sulfur starvation	GO:0010438	other cellular processes | response to stress
	AT5G07690	response to water deprivation	GO:0009414	response to abiotic or biotic stimulus | response to stress
	AT5G07690	induced systemic resistance	GO:0009682	response to abiotic or biotic stimulus | response to stress
	AT5G07690	response to wounding	GO:0009611	response to stress
	AT5G07690	defense response to fungus	GO:0050832	response to stress | response to abiotic or biotic stimulus
AT5G09220	AT5G09220	regulation of plant-type hypersensitive response	GO:0010363	other cellular processes | response to stress
	AT5G09220	response to salt stress	GO:0009651	response to stress | response to abiotic or biotic stimulus
AT5G10230	AT5G10230	response to water deprivation	GO:0009414	response to abiotic or biotic stimulus | response to stress
	AT5G10230	response to heat	GO:0009408	response to stress | response to abiotic or biotic stimulus
	AT5G10230	response to cold	GO:0009409	response to stress | response to abiotic or biotic stimulus
	AT5G10230	response to salt stress	GO:0009651	response to stress | response to abiotic or biotic stimulus
AT5G12020	AT5G12020	response to heat	GO:0009408	response to abiotic or biotic stimulus | response to stress
	AT5G12020	response to hydrogen peroxide	GO:0042542	response to stress
	AT5G12020	response to endoplasmic reticulum stress	GO:0034976	response to stress | other cellular processes
	AT5G12020	response to heat	GO:0009408	response to stress | response to abiotic or biotic stimulus
	AT5G12020	response to heat	GO:0009408	response to stress | response to abiotic or biotic stimulus
AT5G12030	AT5G12030	heat acclimation	GO:0010286	response to abiotic or biotic stimulus | response to stress
	AT5G12030	response to heat	GO:0009408	response to abiotic or biotic stimulus | response to stress
	AT5G12030	response to heat	GO:0009408	response to abiotic or biotic stimulus | response to stress
	AT5G12030	response to hydrogen peroxide	GO:0042542	response to stress
	AT5G12030	response to hydrogen peroxide	GO:0042542	response to stress
	AT5G12030	response to endoplasmic reticulum stress	GO:0034976	response to stress | other cellular processes
	AT5G12030	hyperosmotic response	GO:0006972	response to stress | response to abiotic or biotic stimulus
AT5G14930	AT5G14930	endoplasmic reticulum unfolded protein response	GO:0030968	other cellular processes | response to stress | signal transduction
	AT5G14930	negative regulation of defense response	GO:0031348	response to stress
	AT5G14930	innate immune response	GO:0045087	response to stress
	AT5G14930	systemic acquired resistance	GO:0009627	response to stress | response to abiotic or biotic stimulus
AT5G15180	AT5G15180.1	response to oxidative stress	GO:0006979	response to stress
AT5G18860	AT5G18860	response to wounding	GO:0009611	response to stress
AT5G20850	AT5G20850	double-strand break repair via synthesis-dependent strand annealing	GO:0045003	DNA or RNA metabolism | other cellular processes | response to stress
	AT5G20850	double-strand break repair via homologous recombination	GO:0000724	other cellular processes | DNA or RNA metabolism | response to stress
	AT5G20850	double-strand break repair	GO:0006302	other cellular processes | DNA or RNA metabolism | response to stress
	AT5G20850	DNA repair	GO:0006281	other cellular processes | response to stress | DNA or RNA metabolism
	AT5G20850	double-strand break repair	GO:0006302	other cellular processes | response to stress | DNA or RNA metabolism
AT5G24280	AT5G24280	double-strand break repair	GO:0006302	DNA or RNA metabolism | other cellular processes | response to stress
	AT5G24280	double-strand break repair via homologous recombination	GO:0000724	response to stress | DNA or RNA metabolism | other cellular processes
AT5G38940	AT5G38940.1	response to salt stress	GO:0009651	response to abiotic or biotic stimulus | response to stress
AT5G42180	AT5G42180.1	response to oxidative stress	GO:0006979	response to stress
AT5G42500	AT5G42500	defense response	GO:0006952	response to stress
AT5G42510	AT5G42510	defense response	GO:0006952	response to stress
AT5G47000	AT5G47000.1	response to oxidative stress	GO:0006979	response to stress
AT5G47450	AT5G47450	cellular response to iron ion starvation	GO:0010106	response to stress | other cellular processes
	AT5G47450	response to salt stress	GO:0009651	response to stress | response to abiotic or biotic stimulus
AT5G47630	AT5G47630	defense response to virus	GO:0051607	response to abiotic or biotic stimulus | response to stress
AT5G48720	AT5G48720	double-strand break repair	GO:0006302	other cellular processes | DNA or RNA metabolism | response to stress
	AT5G48720	DNA repair	GO:0006281	response to stress | other cellular processes | DNA or RNA metabolism
AT5G49520	AT5G49520	defense response to bacterium	GO:0042742	response to abiotic or biotic stimulus | response to stress
	AT5G49520	defense response by callose deposition	GO:0052542	response to stress
AT5G53250	AT5G53250	cellular response to iron ion starvation	GO:0010106	response to stress | other cellular processes
AT5G54070	AT5G54070	response to heat	GO:0009408	response to abiotic or biotic stimulus | response to stress
AT5G59070	AT5G59070	response to hypoxia	GO:0001666	response to abiotic or biotic stimulus | response to stress
AT5G59090	AT5G59090	cellular response to iron ion starvation	GO:0010106	other cellular processes | response to stress
AT5G59220	AT5G59220	response to water deprivation	GO:0009414	response to abiotic or biotic stimulus | response to stress
	AT5G59220	response to wounding	GO:0009611	response to stress
	AT5G59220	response to water deprivation	GO:0009414	response to stress | response to abiotic or biotic stimulus
	AT5G59220	response to cold	GO:0009409	response to stress | response to abiotic or biotic stimulus
	AT5G59220	hyperosmotic salinity response	GO:0042538	response to stress | response to abiotic or biotic stimulus
AT5G60660	AT5G60660	cellular response to iron ion starvation	GO:0010106	response to stress | other cellular processes
AT5G64750	AT5G64750	response to osmotic stress	GO:0006970	response to abiotic or biotic stimulus | response to stress
	AT5G64750	defense response to fungus	GO:0050832	response to abiotic or biotic stimulus | response to stress
AT5G66130	AT5G66130.1	DNA repair	GO:0006281	DNA or RNA metabolism | other cellular processes | response to stress
AT5G66390	AT5G66390.1	response to oxidative stress	GO:0006979	response to stress
AT5G66400	AT5G66400	response to water deprivation	GO:0009414	response to abiotic or biotic stimulus | response to stress
	AT5G66400	cold acclimation	GO:0009631	response to stress | response to abiotic or biotic stimulus
