# Supplementary material for: Responses to Telomere Erosion in Plants
Source: PLoS One. 2014 Jan 21;9(1):e86220. doi: 10.1371/journal.pone.0086220 (PMC3897657; doi:10.1371/journal.pone.0086220)
Supplement: Table S5 — Lists of genes belonging to the “DNA repair and recombination” category. The relative induction is indicated for both RNA-seq experiments. (XLSX) [file pone.0086220.s006.xlsx]

## Sheet: supl table 5 - repair
locus	Feature	Description	G7/wt set 1	G7/wt set 2
AT4G37010	CEN2	centrin 2,[Source:TAIR;Acc:AT4G37010]	-2.43333	-1.94828
AT3G05480	RAD9	cell cycle checkpoint control protein family,[Source:TAIR;Acc:AT3G05480]	-2.14286	1.05263
AT3G22880	ATDMC1	DNA repair (Rad51) family protein,[Source:TAIR;Acc:AT3G22880]	-2.07143	1.28889
AT1G75080	BZR1	Brassinosteroid signalling positive regulator (BZR1) family protein,[Source:TAIR;Acc:AT1G75080]	-1.96154	-1.47619
AT3G26680	SNM1	DNA repair metallo-beta-lactamase family protein,[Source:TAIR;Acc:AT3G26680]	-1.93103	1.27523
AT1G27880	AT1G27880	DEAD/DEAH box RNA helicase family protein,[Source:TAIR;Acc:AT1G27880]	-1.60938	1.16071
AT3G12040	AT3G12040	DNA-3-methyladenine glycosylase (MAG),[Source:TAIR;Acc:AT3G12040]	-1.5	-1.38095
AT1G52530	AT1G52530	PCNA-like DNA damage sensor HUS1 (S. pombe) homolog	-1.40341	-1.1958
AT5G40450	AT5G40450	unknown protein,[Source:TAIR;Acc:AT5G40450]	-1.3994	-1.10773
AT3G02540	RAD23C	Rad23 UV excision repair protein family,[Source:TAIR;Acc:AT3G02540]	-1.34792	1.01858
AT1G04020	ATBARD1	breast cancer associated RING 1,[Source:TAIR;Acc:AT1G04020]	-1.33607	-1.28788
AT2G24490	RPA2	replicon protein A2,[Source:TAIR;Acc:AT2G24490]	-1.32143	-1.11957
AT1G71300	AT1G71300	Vps52 / Sac2 family,[Source:TAIR;Acc:AT1G71300]	-1.31633	1.176
AT1G80420	ATXRCC1	BRCT domain-containing DNA repair protein,[Source:TAIR;Acc:AT1G80420]	-1.31405	1.24051
AT5G53770	AT5G53770	Nucleotidyltransferase family protein,[Source:TAIR;Acc:AT5G53770]	-1.28877	1.28758
AT5G54080	HGO	homogentisate 1,2-dioxygenase,[Source:TAIR;Acc:AT5G54080]	-1.27059	1.32479
AT4G02070	MSH6	MUTS homolog 6,[Source:TAIR;Acc:AT4G02070]	-1.26941	1.00676
AT1G48050	KU80	Ku80 family protein,[Source:TAIR;Acc:AT1G48050]	-1.24752	1.17021
AT5G63960	EMB2780	DNA binding;nucleotide binding;nucleic acid binding;DNA-directed DNA polymerases;DNA-directed DNA polymerases,[Source:TAIR;Acc:AT5G63960]	-1.24528	1.20408
AT1G55610	BRL1	BRI1 like,[Source:TAIR;Acc:AT1G55610]	-1.24444	1
AT4G36050	AT4G36050	endonuclease/exonuclease/phosphatase family protein,[Source:TAIR;Acc:AT4G36050]	-1.23913	1.12871
AT3G12710	AT3G12710	DNA glycosylase superfamily protein,[Source:TAIR;Acc:AT3G12710]	-1.2303	1.07006
AT5G08020	ATRPA70B	RPA70-kDa subunit B,[Source:TAIR;Acc:AT5G08020]	-1.22881	-1.24691
AT4G00020	MEE43	BREAST CANCER 2 like 2A,[Source:TAIR;Acc:AT4G00020]	-1.22449	1.01333
AT1G73690	CDKD1;1	cyclin-dependent kinase D1;1,[Source:TAIR;Acc:AT1G73690]	-1.22222	1.48387
Q9MA98	AT3G05210	DNA excision repair protein ERCC-1 (AtERCC1)(AtRAD10)(EC 3,1,-,-)(Ultraviolet hypersensitive 7) [Source:UniProtKB/Swiss-Prot;Acc:Q9MA98]	-1.22093	1.04661
AT2G19490	AT2G19490	recA DNA recombination family protein,[Source:TAIR;Acc:AT2G19490]	-1.22034	1.5814
AT5G27620	CYCH;1	cyclin H;1,[Source:TAIR;Acc:AT5G27620]	-1.20325	1.08553
AT1G07745	ATRAD51D	homolog of RAD51 D,[Source:TAIR;Acc:AT1G07745]	-1.2	-1.11765
AT2G45280	RAD51C	RAS associated with diabetes protein 51C,[Source:TAIR;Acc:AT2G45280]	-1.2	1.73846
AT1G07370	PCNA1	proliferating cellular nuclear antigen 1,[Source:TAIR;Acc:AT1G07370]	-1.19608	1.02871
AT1G10930	ATSGS1	DNA helicase (RECQl4A),[Source:TAIR;Acc:AT1G10930]	-1.19463	1.25581
AT3G02060	AT3G02060	DEAD/DEAH box helicase, putative,[Source:TAIR;Acc:AT3G02060]	-1.18721	1.22837
AT5G61000	RPA70D	Replication factor-A protein 1-related,[Source:TAIR;Acc:AT5G61000]	-1.18333	1.18957
AT5G47860	AT5G47860	Protein of unknown function (DUF1350),[Source:TAIR;Acc:AT5G47860]	-1.183	1.09294
AT3G46940	DUT1	DUTP-PYROPHOSPHATASE-LIKE 1,[Source:TAIR;Acc:AT3G46940]	-1.17701	-1.22388
AT5G64520	XRCC2	homolog of X-ray repair cross complementing 2 (XRCC2),[Source:TAIR;Acc:AT5G64520]	-1.17647	1.11111
AT3G10140	RECA3	RECA homolog 3,[Source:TAIR;Acc:AT3G10140]	-1.17526	1.08678
AT1G27840	ATCSA-1	Transducin/WD40 repeat-like superfamily protein,[Source:TAIR;Acc:AT1G27840]	-1.1747	-1.09434
AT3G10010	DML2	demeter-like 2,[Source:TAIR;Acc:AT3G10010]	-1.1729	1.18056
AT5G62540	UBC3	ubiquitin-conjugating enzyme 3,[Source:TAIR;Acc:AT5G62540]	-1.16901	-1.2069
AT5G58760	DDB2	damaged DNA binding 2,[Source:TAIR;Acc:AT5G58760]	-1.16151	-1.09412
AT4G17380	MSH4	MUTS-like protein 4,[Source:TAIR;Acc:AT4G17380]	-1.15883	1.04861
AT5G24850	CRY3	cryptochrome 3,[Source:TAIR;Acc:AT5G24850]	-1.15674	-1.60284
AT5G16630	ATRAD4	DNA repair protein Rad4 family,[Source:TAIR;Acc:AT5G16630]	-1.15254	1.37714
AT1G19750	AT1G19750	Transducin/WD40 repeat-like superfamily protein,[Source:TAIR;Acc:AT1G19750]	-1.15	1.03571
AT1G18340	AT1G18340	basal transcription factor complex subunit-related,[Source:TAIR;Acc:AT1G18340]	-1.14583	1.56436
AT4G30820	AT4G30820	cyclin-dependent kinase-activating kinase assembly factor-related / CDK-activating kinase assembly factor-related,[Source:TAIR;Acc:AT4G30820]	-1.14474	1.43077
AT4G09140	ATMLH1	MUTL-homologue 1,[Source:TAIR;Acc:AT4G09140]	-1.14286	1.0915
AT1G29630	AT1G29630	5'-3' exonuclease family protein,[Source:TAIR;Acc:AT1G29630]	-1.13095	1.03226
AT5G02820	RHL2	Spo11/DNA topoisomerase VI, subunit A protein,[Source:TAIR;Acc:AT5G02820]	-1.11423	1.13262
AT1G65070	AT1G65070	DNA mismatch repair protein MutS, type 2,[Source:TAIR;Acc:AT1G65070]	-1.11417	1.10654
AT5G63950	CHR24	chromatin remodeling 24,[Source:TAIR;Acc:AT5G63950]	-1.11024	1.01047
AT4G21100	DDB1B	damaged DNA binding protein 1B,[Source:TAIR;Acc:AT4G21100]	-1.10561	1.25057
AT3G52560	UEV1D-4	ubiquitin E2 variant 1D-4,[Source:TAIR;Acc:AT3G52560]	-1.10492	-1.0023
AT1G14400	UBC1	ubiquitin carrier protein 1,[Source:TAIR;Acc:AT1G14400]	-1.099	-1.04338
AT3G06820	AT3G06820	Mov34/MPN/PAD-1 family protein,[Source:TAIR;Acc:AT3G06820]	-1.09091	-1.06751
AT1G66730	AtLIG6	DNA LIGASE 6,[Source:TAIR;Acc:AT1G66730]	-1.08889	-1.00526
AT1G50840	POLGAMMA2	polymerase gamma 2,[Source:TAIR;Acc:AT1G50840]	-1.06503	1.13462
AT3G18524	MSH2	MUTS homolog 2,[Source:TAIR;Acc:AT3G18524]	-1.06289	1.36957
AT1G78870	UBC35	ubiquitin-conjugating enzyme 35,[Source:TAIR;Acc:AT1G78870]	-1.05238	1.01724
AT4G32700	AT4G32700	helicases;ATP-dependent helicases;nucleic acid binding;ATP binding;DNA-directed DNA polymerases;DNA binding,[Source:TAIR;Acc:AT4G32700]	-1.05025	-1.1338
AT4G04720	CPK21	calcium-dependent protein kinase 21,[Source:TAIR;Acc:AT4G04720]	-1.0499	1.13177
AT5G44740	POLH	Y-family DNA polymerase H,[Source:TAIR;Acc:AT5G44740]	-1.04878	1.40816
AT3G24495	MSH7	MUTS homolog 7,[Source:TAIR;Acc:AT3G24495]	-1.04142	-1.25641
AT1G05900	ATNTH2	endonuclease III 2,[Source:TAIR;Acc:AT1G05900]	-1.04098	-1.30769
NP_199288	AT5G44750	REV1; DNA-directed DNA polymerase [Source:RefSeq peptide;Acc:NP_199288]	-1.0395	1.41316
AT1G52500	FPG-2	MUTM homolog-1,[Source:TAIR;Acc:AT1G52500]	-1.03906	-1.16204
AT3G05740	RECQI1	RECQ helicase l1,[Source:TAIR;Acc:AT3G05740]	-1.03774	1.09615
AT1G80200	AT1G80200	unknown protein,[Source:TAIR;Acc:AT1G80200]	-1.03311	1.20619
AT1G03190	ATXPD	RAD3-like DNA-binding helicase protein,[Source:TAIR;Acc:AT1G03190]	-1.02632	1.43089
AT5G27680	RECQSIM	RECQ helicase SIM,[Source:TAIR;Acc:AT5G27680]	-1.02353	1.225
AT2G31970	RAD50	DNA repair-recombination protein (RAD50),[Source:TAIR;Acc:AT2G31970]	-1.02222	1.28369
AT3G24320	MSH1	MUTL protein homolog 1,[Source:TAIR;Acc:AT3G24320]	-1.0119	1.02797
AT4G05420	DDB1A	damaged DNA binding protein 1A,[Source:TAIR;Acc:AT4G05420]	-1.00948	1.00268
AT1G21710	OGG1	8-oxoguanine-DNA glycosylase 1,[Source:TAIR;Acc:AT1G21710]	-1.00948	1.37445
AT1G79650	RAD23B	Rad23 UV excision repair protein family,[Source:TAIR;Acc:AT1G79650]	-1.00926	1.26042
AT1G15970	AT1G15970	DNA glycosylase superfamily protein,[Source:TAIR;Acc:AT1G15970]	-1.00645	1.03061
AT1G49980	AT1G49980	DNA/RNA polymerases superfamily protein,[Source:TAIR;Acc:AT1G49980]	-1.0051	-1.00829
AT2G36490	DML1	demeter-like 1,[Source:TAIR;Acc:AT2G36490]	-1.00336	-1.01351
AT5G48120	AT5G48120	ARM repeat superfamily protein,[Source:TAIR;Acc:AT5G48120]	1.00418	1.12241
AT5G04560	DME	HhH-GPD base excision DNA repair family protein,[Source:TAIR;Acc:AT5G04560]	1.0075	1.21032
AT3G50880	AT3G50880	DNA glycosylase superfamily protein,[Source:TAIR;Acc:AT3G50880]	1.00823	1.01984
AT5G38470	RAD23D	Rad23 UV excision repair protein family,[Source:TAIR;Acc:AT5G38470]	1.01079	1.04021
AT2G36060	MMZ3	MMS ZWEI homologue 3,[Source:TAIR;Acc:AT2G36060]	1.01325	1.07615
AT1G67500	REV3	recovery protein 3,[Source:TAIR;Acc:AT1G67500]	1.01463	1.32
AT5G41370	XPB1	homolog of xeroderma pigmentosum complementation group B 1,[Source:TAIR;Acc:AT5G41370]	1.01928	1.21868
AT1G31360	RECQL2	RECQ helicase L2,[Source:TAIR;Acc:AT1G31360]	1.0202	1.12632
AT3G61420	AT3G61420	BSD domain (BTF2-like transcription factors, Synapse-associated proteins and DOS2-like proteins),[Source:TAIR;Acc:AT3G61420]	1.0221	-1.24275
NP_567236	AT4G02460	PMS1 (POSTMEIOTIC SEGREGATION 1); ATP binding / mismatched DNA binding [Source:RefSeq peptide;Acc:NP_567236]	1.02273	1.15315
AT5G45400	RPA70C	Replication factor-A protein 1-related,[Source:TAIR;Acc:AT5G45400]	1.02564	1.29703
O65607	AT4G25540	DNA mismatch repair protein Msh3 (AtMsh3) [Source:UniProtKB/Swiss-Prot;Acc:O65607]	1.03448	1.14286
AT1G16590	REV7	DNA-binding HORMA family protein,[Source:TAIR;Acc:AT1G16590]	1.03704	1.125
AT3G48190	ATM	ataxia-telangiectasia mutated,[Source:TAIR;Acc:AT3G48190]	1.04982	1.13806
AT1G08130	ATLIG1	DNA ligase 1,[Source:TAIR;Acc:AT1G08130]	1.05236	-1.11798
AT4G18590	AT4G18590	Nucleic acid-binding, OB-fold-like protein,[Source:TAIR;Acc:AT4G18590]	1.0582	1.05907
AT5G57970	AT5G57970	DNA glycosylase superfamily protein,[Source:TAIR;Acc:AT5G57970]	1.07353	1.01389
Q9ATY5	AT3G28030	DNA repair protein UVH3 (EC 3,1,-,-)(UV hypersensitive protein 3)(XPG homolog)(ERCC5 homolog)(RAD2 homolog)(AtUVH3)(AtXPG)(AtRAD2) [Source:UniProtKB/Swiss-Prot;Acc:Q9ATY5]	1.07519	1.22527
AT1G27410	AT1G27410	DNA repair metallo-beta-lactamase family protein,[Source:TAIR;Acc:AT1G27410]	1.07609	1.375
AT2G26980	CIPK3	CBL-interacting protein kinase 3,[Source:TAIR;Acc:AT2G26980]	1.08254	1.64747
AT1G68760	ATNUDT1	nudix hydrolase 1,[Source:TAIR;Acc:AT1G68760]	1.08333	1.15741
AT1G23260	MMZ1	MMS ZWEI homologue 1,[Source:TAIR;Acc:AT1G23260]	1.08392	1.1029
AT5G40820	ATRAD3	Ataxia telangiectasia-mutated and RAD3-related,[Source:TAIR;Acc:AT5G40820]	1.08491	1.16667
AT2G06510	ATRPA1A	replication protein A 1A,[Source:TAIR;Acc:AT2G06510]	1.08553	-1.0125
AT3G02680	NBS1	nijmegen breakage syndrome 1,[Source:TAIR;Acc:AT3G02680]	1.08571	1.2381
AT2G01440	AT2G01440	DEAD/DEAH box RNA helicase family protein,[Source:TAIR;Acc:AT2G01440]	1.08696	1.08824
AT1G75230	AT1G75230	DNA glycosylase superfamily protein,[Source:TAIR;Acc:AT1G75230]	1.09326	-1.01339
AT1G79040	PSBR	photosystem II subunit R,[Source:TAIR;Acc:AT1G79040]	1.10101	1.05455
AT1G16190	RAD23A	Rad23 UV excision repair protein family,[Source:TAIR;Acc:AT1G16190]	1.10256	-1.12209
AT1G10520	AT1G10520	DNA polymerase lambda (POLL),[Source:TAIR;Acc:AT1G10520]	1.12	1.2
AT1G50030	TOR	target of rapamycin,[Source:TAIR;Acc:AT1G50030]	1.12779	-1.02004
AT3G07930	AT3G07930	DNA glycosylase superfamily protein,[Source:TAIR;Acc:AT3G07930]	1.13592	1.17308
AT3G48425	AT3G48425	DNAse I-like superfamily protein,[Source:TAIR;Acc:AT3G48425]	1.14925	1.18056
AT1G60930	RECQL4B	RECQ helicase L4B,[Source:TAIR;Acc:AT1G60930]	1.15909	1.06
AT1G80840	WRKY40	WRKY DNA-binding protein 40,[Source:TAIR;Acc:AT1G80840]	1.16867	-1.59223
AT4G25120	SRS2	P-loop containing nucleoside triphosphate hydrolases superfamily protein,[Source:TAIR;Acc:AT4G25120]	1.17391	-1.03333
AT2G18760	CHR8	chromatin remodeling 8,[Source:TAIR;Acc:AT2G18760]	1.1831	1.08252
AT2G41460	ARP	apurinic endonuclease-redox protein,[Source:TAIR;Acc:AT2G41460]	1.20588	-1.0315
AT3G23100	XRCC4	homolog of human DNA ligase iv-binding protein XRCC4,[Source:TAIR;Acc:AT3G23100]	1.208	1.33333
AT1G11770	AT1G11770	FAD-binding Berberine family protein,[Source:TAIR;Acc:AT1G11770]	1.21014	1.47664
AT3G52630	AT3G52630	Nucleic acid-binding, OB-fold-like protein,[Source:TAIR;Acc:AT3G52630]	1.22059	1.06329
AT4G17010	AT4G17010	unknown protein,[Source:TAIR;Acc:AT4G17010]	1.24615	1.26543
AT5G44680	AT5G44680	DNA glycosylase superfamily protein,[Source:TAIR;Acc:AT5G44680]	1.24766	-1.43897
AT2G02760	ATUBC2	ubiquiting-conjugating enzyme 2,[Source:TAIR;Acc:AT2G02760]	1.25617	1.125
AT3G14890	AT3G14890	phosphoesterase,[Source:TAIR;Acc:AT3G14890]	1.26415	-1.04878
AT5G41360	XPB2	homolog of Xeroderma pigmentosum complementation group B 2,[Source:TAIR;Acc:AT5G41360]	1.29508	1.16183
AT1G66750	CDKD1;2	CDK-activating kinase 4,[Source:TAIR;Acc:AT1G66750]	1.29545	1.02326
AT1G55750	AT1G55750	BSD domain (BTF2-like transcription factors, Synapse-associated proteins and DOS2-like proteins),[Source:TAIR;Acc:AT1G55750]	1.30645	1.31183
AT1G20540	AT1G20540	Transducin/WD40 repeat-like superfamily protein,[Source:TAIR;Acc:AT1G20540]	1.33333	1.03333
AT4G34060	DML3	demeter-like protein 3,[Source:TAIR;Acc:AT4G34060]	1.3913	-1.29268
Q9XGM2	AT5G54260	Double-strand break repair protein MRE11 [Source:UniProtKB/Swiss-Prot;Acc:Q9XGM2]	1.40741	1.25676
AT1G02670	AT1G02670	P-loop containing nucleoside triphosphate hydrolases superfamily protein,[Source:TAIR;Acc:AT1G02670]	1.53333	1.57143
NP_567576	AT4G19130	DNA binding / nucleic acid binding / zinc ion binding [Source:RefSeq peptide;Acc:NP_567576]	1.53571	1.7
AT4G35520	MLH3	MUTL protein homolog 3,[Source:TAIR;Acc:AT4G35520]	1.53571	-1.05952
AT2G31320	PARP2	poly(ADP-ribose) polymerase 2,[Source:TAIR;Acc:AT2G31320]	1.664	1.27097
AT1G31280	Ago2	Argonaute family protein,[Source:TAIR;Acc:AT1G31280]	1.89	1.59
AT4G35740	RecQl3	DEAD/DEAH box RNA helicase family protein,[Source:TAIR;Acc:AT4G35740]	1.90196	1.76623
AT5G66130	ATRAD17	RADIATION SENSITIVE 17,[Source:TAIR;Acc:AT5G66130]	1.96154	1.98667
AT1G08260	EMB142	DNA polymerase epsilon catalytic subunit,[Source:TAIR;Acc:AT1G08260]	2.09615	1.42932
AT5G20850	ATRAD51	RAS associated with diabetes protein 51,[Source:TAIR;Acc:AT5G20850]	2.2	2.08511
AT3G19210	RAD54	homolog of RAD54,[Source:TAIR;Acc:AT3G19210]	2.24242	1.46875
AT4G21070	ATBRCA1	breast cancer susceptibility1,[Source:TAIR;Acc:AT4G21070]	2.60185	1.56394
AT4G02390	PARP1	poly(ADP-ribose) polymerase,[Source:TAIR;Acc:AT4G02390]	4.81818	3.08
AT3G32920	AT3G32920	P-loop containing nucleoside triphosphate hydrolases superfamily protein,[Source:TAIR;Acc:AT3G32920]	6.8	4.14286
