# Supplementary material for: Responses to Telomere Erosion in Plants
Source: PLoS One. 2014 Jan 21;9(1):e86220. doi: 10.1371/journal.pone.0086220 (PMC3897657; doi:10.1371/journal.pone.0086220)
Supplement: Table S6 — Lists of genes belonging to the “cell cycle” category. The relative induction is indicated for both RNA-seq experiments. (XLSX) [file pone.0086220.s007.xlsx]

## Sheet: supl table 6 - cell cycle
synonym	gene ID	Description	G7/wt set 1	G7/wt set 2
CDC20;2	At4g33270	Transducin family protein / WD-40 repeat family protein,[Source:TAIR;Acc:AT4G33270]	-1.93529	-1.15
CYCB1;2	At5g06150	Cyclin family protein,[Source:TAIR;Acc:AT5G06150]	-1.82716	-1.24731
KRP7	At1g49620	Cyclin-dependent kinase inhibitor family protein,[Source:TAIR;Acc:AT1G49620]	-1.81481	-1.14706
CDKB2;1	At1g76540	Auxin efflux carrier family protein,[Source:TAIR;Acc:AT1G76530]	-1.75	-1.4026
CYCB2;2	At4g35620	Cyclin-B2-2 (G2/mitotic-specific cyclin-B2-2)(CycB2;2)(Cyclin-2b)(Cyc2b-At) [Source:UniProtKB/Swiss-Prot;Acc:Q39070]	-1.75	1.1
CDC20;1	At4g33260	Transducin family protein / WD-40 repeat family protein,[Source:TAIR;Acc:AT4G33260]	-1.72917	-1.25758
CYCB3;1	At1g16330	cyclin b3;1,[Source:TAIR;Acc:AT1G16330]	-1.72727	1.16667
CYCA2;4	At1g80370	Cyclin A2;4,[Source:TAIR;Acc:AT1G80370]	-1.69231	-1.13889
CDKL;12	At1g71530	other RNA,[Source:TAIR;Acc:AT1G71528]	-1.64706	-1.09
CYCD3;2	At5g67260	CYCLIN D3;2,[Source:TAIR;Acc:AT5G67260]	-1.64133	-1.03229
CYCA2;3	At1g15570	CYCLIN A2;3,[Source:TAIR;Acc:AT1G15570]	-1.59574	-1.18919
CDKB2;2	At1g20930	cyclin-dependent kinase B2;2,[Source:TAIR;Acc:AT1G20930]	-1.59184	1.24528
DEL1	At3g48160	DP-E2F-like 1,[Source:TAIR;Acc:AT3G48160]	-1.5625	1.1
CYCB1;3	At3g11520	CYCLIN B1;3,[Source:TAIR;Acc:AT3G11520]	-1.52174	-1.36364
SMR10	At2g28870	unknown protein,[Source:TAIR;Acc:AT2G28870]	-1.5	1.47826
E2Fa	At2g36010	E2F transcription factor 3,[Source:TAIR;Acc:AT2G36010]	-1.475	1
CYCB2;4	At1g76310	CYCLIN B2;4,[Source:TAIR;Acc:AT1G76310]	-1.46809	-2.5
CDT1a	At2g31270	homolog of yeast CDT1 A,[Source:TAIR;Acc:AT2G31270]	-1.44966	-1.17708
MYB3R4	At5g11510	myb domain protein 3r-4,[Source:TAIR;Acc:AT5G11510]	-1.35577	1.11628
CDKL;2	At1g74330	Protein kinase superfamily protein,[Source:TAIR;Acc:AT1G74330]	-1.2585	1.07834
CYCA1;1	At1g44110	Cyclin A1;1,[Source:TAIR;Acc:AT1G44110]	-1.25333	1.02632
CYCD3;1	At4g34160	CYCLIN D3;1,[Source:TAIR;Acc:AT4G34160]	-1.23954	-1.28099
CYCD1;1	At1g70210	CYCLIN D1;1,[Source:TAIR;Acc:AT1G70210]	-1.23457	-1.28736
CDT1b	At3g54710	homolog of yeast CDT1 B homolog of yeast CDT1 B,[Source:TAIR;Acc:AT3G54710]	-1.22222	-1.11364
CDKD;1	At1g73690	cyclin-dependent kinase D1;1,[Source:TAIR;Acc:AT1G73690]	-1.22222	1.48387
CYCH;1	At5g27620	cyclin H;1,[Source:TAIR;Acc:AT5G27620]	-1.20325	1.08553
CDKE;1	At5g63610	cyclin-dependent kinase E;1,[Source:TAIR;Acc:AT5G63610]	-1.20307	1.00769
CDKB1;1	At3g54180	cyclin-dependent kinase B1;1,[Source:TAIR;Acc:AT3G54180]	-1.2027	-1.11111
CDC6	At2g29680	cell division control 6,[Source:TAIR;Acc:AT2G29680]	-1.18182	1.25
CDKL;9	At1g54610	Protein kinase superfamily protein,[Source:TAIR;Acc:AT1G54610]	-1.17497	-1.06715
CYCD6;1	At4g03270	Cyclin D6;1,[Source:TAIR;Acc:AT4G03270]	-1.17241	-1.71429
MAT1	At1g02500	S-adenosylmethionine synthetase 1,[Source:TAIR;Acc:AT1G02500]	-1.17001	-1.02787
CDKF;1	At4g28980	CDK-activating kinase 1AT,[Source:TAIR;Acc:AT4G28980]	-1.16944	1.05433
CYCA3;1	At5g43080	Cyclin A3;1,[Source:TAIR;Acc:AT5G43080]	-1.16216	-1.51852
CDKB1;2	At2g38620	cyclin-dependent kinase B1;2,[Source:TAIR;Acc:AT2G38620]	-1.15888	-1.10843
SIM	At5g04470	cyclin-dependent protein kinase inhibitors,[Source:TAIR;Acc:AT5G04470]	-1.15816	-1.28165
MYB3R5	At5g02320	myb domain protein 3r-5,[Source:TAIR;Acc:AT5G02320]	-1.15385	-1.04878
GIG1	At3g57860		-1.15	-1.2381
UVI4	At2g42260	uv-b-insensitive 4,[Source:TAIR;Acc:AT2G42260]	-1.15	-1.17143
CDKL;8	At3g05050	Protein kinase superfamily protein,[Source:TAIR;Acc:AT3G05050]	-1.14711	-1.0628
CDKC;2	At5g64960	cyclin dependent kinase group C2,[Source:TAIR;Acc:AT5G64960]	-1.14586	1.20686
CYCB1;4	At2g26760	Cyclin B1;4,[Source:TAIR;Acc:AT2G26760]	-1.12791	-1.45283
SMR11	At2g28330	unknown protein,[Source:TAIR;Acc:AT2G28330]	-1.12727	1.25714
KRP4	At2g32710	Cyclin-dependent kinase inhibitor family protein,[Source:TAIR;Acc:AT2G32710]	-1.09798	-1.07143
CKS1	At2g27960	cyclin-dependent kinase-subunit 1,[Source:TAIR;Acc:AT2G27960]	-1.08871	1.01049
MYB3R1	At4g32730	Homeodomain-like protein,[Source:TAIR;Acc:AT4G32730]	-1.07675	1.19868
CDKL;15	At1g53050	Protein kinase superfamily protein,[Source:TAIR;Acc:AT1G53050]	-1.07006	1.09801
DEL3	At3g01330	DP-E2F-like protein 3,[Source:TAIR;Acc:AT3G01330]	-1.06061	-1.15789
CCS52B	At5g13840	FIZZY-related 3,[Source:TAIR;Acc:AT5G13840]	-1.05823	1.25055
CDKG;1	At5g63370	Protein kinase superfamily protein,[Source:TAIR;Acc:AT5G63370]	-1.0377	1.22213
CDKG;2	At1g67580	Protein kinase superfamily protein,[Source:TAIR;Acc:AT1G67580]	-1.02358	1.09114
CYCA3;4	At1g47230	CYCLIN A3;4,[Source:TAIR;Acc:AT1G47230]	-1.01389	-1.36986
Rb	At3g12280	retinoblastoma-related 1,[Source:TAIR;Acc:AT3G12280]	-1.0039	-1.05898
DPb	At5g03415	Transcription factor DP,[Source:TAIR;Acc:AT5G03415]	1.0122	-1.06587
E2Fb	At5g22220	E2F transcription factor 1,[Source:TAIR;Acc:AT5G22220]	1.01754	1.10938
KRP1	At2g23430	Cyclin-dependent kinase inhibitor family protein,[Source:TAIR;Acc:AT2G23430]	1.03614	-1.28302
CDKL;6	At1g03740	Protein kinase superfamily protein,[Source:TAIR;Acc:AT1G03740]	1.0375	-1.13897
CCS52A2	At4g11920	cell cycle switch protein 52 A2,[Source:TAIR;Acc:AT4G11920]	1.04348	-1.39394
CYCB2;3	At1g20610	Cyclin B2;3,[Source:TAIR;Acc:AT1G20610]	1.04348	-1.36842
CYCD2:1	At2g22490	Cyclin D2;1,[Source:TAIR;Acc:AT2G22490]	1.04515	1.50203
KRP5	At3g24810	Cyclin-dependent kinase inhibitor family protein,[Source:TAIR;Acc:AT3G24810]	1.04651	-2
CDKC;1	At5g10270	cyclin-dependent kinase C;1,[Source:TAIR;Acc:AT5G10270]	1.04762	1.18605
CYCD3;3	At3g50070	CYCLIN D3;3,[Source:TAIR;Acc:AT3G50070]	1.05603	1.18725
CKS2	At2g27970	CDK-subunit 2,[Source:TAIR;Acc:AT2G27970]	1.06061	-1.16901
CDKA;1	At3g48750	cell division control 2,[Source:TAIR;Acc:AT3G48750]	1.08156	1.01619
CDKD;3	At1g18040	Protein phosphatase 2C family protein,[Source:TAIR;Acc:AT1G18030]	1.08333	1.14019
SMR2	At1g08180	unknown protein,[Source:TAIR;Acc:AT1G08180]	1.11111	1.14634
KRP2	At3g50630	KIP-related protein 2,[Source:TAIR;Acc:AT3G50630]	1.12434	1.15179
SMR8	At1g10690	unknown protein,[Source:TAIR;Acc:AT1G10690]	1.125	-1.52381
CYCC1;2	At5g48630	Cyclin family protein,[Source:TAIR;Acc:AT5G48630]	1.13043	1.31217
MYB3R3	At3g09370	myb domain protein 3r-3,[Source:TAIR;Acc:AT3G09370]	1.13636	1.14583
CDKL;10	At1g57700	Protein kinase superfamily protein,[Source:TAIR;Acc:AT1G57700]	1.14286	-1.15663
CDKL;7	At5g50860	Protein kinase superfamily protein,[Source:TAIR;Acc:AT5G50860]	1.15625	1.22424
CYCC1;1	At5g48640	Cyclin family protein,[Source:TAIR;Acc:AT5G48640]	1.16456	1.32026
E2Fc	At1g47870	winged-helix DNA-binding transcription factor family protein,[Source:TAIR;Acc:AT1G47870]	1.17021	1.21739
CYCA3;2	At1g47210	cyclin-dependent protein kinase 3;2,[Source:TAIR;Acc:AT1G47210]	1.17544	1.21006
DPa	At5g02470	Transcription factor DP,[Source:TAIR;Acc:AT5G02470]	1.17808	1.14493
SMR3	At5g02420		1.19048	-1.34783
CCS52A1	At4g22910	FIZZY-related 2,[Source:TAIR;Acc:AT4G22910]	1.19643	1.12093
CDKL;14	At1g33770	Protein of unknown function (DUF179),[Source:TAIR;Acc:AT1G33780]	1.20942	1.06007
CYCD4;1	At5g65420	CYCLIN D4;1,[Source:TAIR;Acc:AT5G65420]	1.21739	2.33333
CDKL;5	At5g44290	Protein kinase superfamily protein,[Source:TAIR;Acc:AT5G44290]	1.22843	1.10998
CYCD5;1	At4g37630	cyclin d5;1,[Source:TAIR;Acc:AT4G37630]	1.23333	1
SMR6	At5g40460		1.25	1.69231
CDKD;2	At1g66750	CDK-activating kinase 4,[Source:TAIR;Acc:AT1G66750]	1.29545	1.02326
SMR1	At3g10525	LOSS OF GIANT CELLS FROM ORGANS,[Source:TAIR;Acc:AT3G10525]	1.29891	-1.32905
CDC25	At5g03455	Rhodanese/Cell cycle control phosphatase superfamily protein,[Source:TAIR;Acc:AT5G03455]	1.30744	1.04456
KRP6	At3g19150	KIP-related protein 6,[Source:TAIR;Acc:AT3G19150]	1.58667	1.88
CDKL;3	At1g18670	Protein kinase superfamily protein,[Source:TAIR;Acc:AT1G18670]	1.70588	1.11224
WEE1	At1g02970	WEE1 kinase homolog,[Source:TAIR;Acc:AT1G02970]	1.97059	1.46
CYCB1;1	At4g37490		2.31169	1.56604
SMR5	At1g07500	unknown protein,[Source:TAIR;Acc:AT1G07500]	2.46575	1.08333
SMR7	At3g27630	unknown protein,[Source:TAIR;Acc:AT3G27630]	11.8571	4.33333
CDKL;11	At1g09600		#DIV/0!	#DIV/0!
SDS	At1g14750		#DIV/0!	#DIV/0!
CYCB2;5	At1g20590		#DIV/0!	#DIV/0!
CYCB1;5	At1g34460		#DIV/0!	#DIV/0!
CYCA3;3	At1g47220		#DIV/0!	#DIV/0!
SMR9	At1g51355		#DIV/0!	#DIV/0!
CYCA1;2	At1g77390		#DIV/0!	#DIV/0!
CYCB2;1	At2g17620		#DIV/0!	#DIV/0!
SMR12	At2g37610		#DIV/0!	#DIV/0!
MYB3R2	At4g00540		#DIV/0!	#DIV/0!
CDKL;13	At4g10010		#DIV/0!	#DIV/0!
CDKL;4	At4g22940		#DIV/0!	#DIV/0!
CYCD7;1	At5g02110		#DIV/0!	#DIV/0!
SMR4	At5g02220		#DIV/0!	#DIV/0!
CYCD4;2	At5g10440		#DIV/0!	#DIV/0!
CYCA2;2	At5g11300		#DIV/0!	#DIV/0!
DEL2	At5g14960		#DIV/0!	#DIV/0!
CYCA2;1	At5g25380		#DIV/0!	#DIV/0!
CDC20;3	At5g26900		#DIV/0!	#DIV/0!
CDC20;5	At5g27080		#DIV/0!	#DIV/0!
CDC20;4	At5g27570		#DIV/0!	#DIV/0!
CDKL;1	At5g39420		#DIV/0!	#DIV/0!
KRP3	At5g48820		#DIV/0!	#DIV/0!
SMR13	At5g59360		#DIV/0!	#DIV/0!
