# Supplementary material for: Responses to Telomere Erosion in Plants
Source: PLoS One. 2014 Jan 21;9(1):e86220. doi: 10.1371/journal.pone.0086220 (PMC3897657; doi:10.1371/journal.pone.0086220)
Supplement: Table S7 — Lists of genes belonging to the “PCD/senescence” category. The relative induction is indicated for both RNA-seq experiments. (XLSX) [file pone.0086220.s008.xlsx]

## Sheet: supl table 7 - PCDsenescence
locus	Feature	Description	G7/wt set 1	G7/wt set 2
AT3G01570	AT3G01570_gene	Oleosin family protein,[Source:TAIR;Acc:AT3G01570]	-5.55556	-2.57143
AT2G28490	AT2G28490_gene	RmlC-like cupins superfamily protein,[Source:TAIR;Acc:AT2G28490]	-5.54545	-7.5
AT1G06360	AT1G06360_gene	Fatty acid desaturase family protein,[Source:TAIR;Acc:AT1G06360]	-5.19355	-2.15054
AT4G22490	AT4G22490_gene	Bifunctional inhibitor/lipid-transfer protein/seed storage 2S albumin superfamily protein,[Source:TAIR;Acc:AT4G22490]	-4.65775	-252
AT2G48140	EDA4_gene	Bifunctional inhibitor/lipid-transfer protein/seed storage 2S albumin superfamily protein,[Source:TAIR;Acc:AT2G48140]	-2.66406	-2.34171
AT4G28780	AT4G28780_gene	GDSL-like Lipase/Acylhydrolase superfamily protein,[Source:TAIR;Acc:AT4G28780]	-2.30328	-1.21398
AT3G08770	LTP6_gene	lipid transfer protein 6,[Source:TAIR;Acc:AT3G08770]	-2.24112	-4.07778
AT3G22600	AT3G22600_gene	Bifunctional inhibitor/lipid-transfer protein/seed storage 2S albumin superfamily protein,[Source:TAIR;Acc:AT3G22600]	-2.02736	-3.58317
AT3G04290	ATLTL1_gene	Li-tolerant lipase 1,[Source:TAIR;Acc:AT3G04290]	-1.79681	-1.87892
NP_174326	AT1G30370_gene	lipase class 3 family protein [Source:RefSeq peptide;Acc:NP_174326]	-1.76471	-28
AT1G33811	AT1G33811_gene	GDSL-like Lipase/Acylhydrolase superfamily protein,[Source:TAIR;Acc:AT1G33811]	-1.57426	-1.24749
AT2G26560	PLP2_gene	phospholipase A 2A,[Source:TAIR;Acc:AT2G26560]	-1.25676	-1.42105
AT3G43720	AT3G43720_gene	Bifunctional inhibitor/lipid-transfer protein/seed storage 2S albumin superfamily protein,[Source:TAIR;Acc:AT3G43720]	-1.09513	-1.02958
AT3G27660	OLEO4_gene	oleosin 4,[Source:TAIR;Acc:AT3G27660]	-1.07143	1.02326
AT5G45950	AT5G45950_gene	GDSL-like Lipase/Acylhydrolase superfamily protein,[Source:TAIR;Acc:AT5G45950]	-1.04373	-1.23891
AT3G52430	PAD4_gene	alpha/beta-Hydrolases superfamily protein,[Source:TAIR;Acc:AT3G52430]	-1.01293	-1.05385
AT5G20000	AT5G20000_gene	AAA-type ATPase family protein,[Source:TAIR;Acc:AT5G20000]	1.07547	1.39479
AT5G56100	AT5G56100_gene	glycine-rich protein / oleosin,[Source:TAIR;Acc:AT5G56100]	1.07636	-1.22249
AT3G48090	EDS1_gene	alpha/beta-Hydrolases superfamily protein,[Source:TAIR;Acc:AT3G48090]	1.07774	-1.08411
NP_192984	AT4G12470_gene	protease inhibitor/seed storage/lipid transfer protein (LTP) family protein [Source:RefSeq peptide;Acc:NP_192984]	1.07887	1.40923
AT3G22620	PBD1_gene	Bifunctional inhibitor/lipid-transfer protein/seed storage 2S albumin superfamily protein,[Source:TAIR;Acc:AT3G22620]	1.13636	1.23693
AT3G22630	PBD1_gene	Bifunctional inhibitor/lipid-transfer protein/seed storage 2S albumin superfamily protein,[Source:TAIR;Acc:AT3G22620]	1.13636	1.23693
AT3G16370	AT3G16370_gene	GDSL-like Lipase/Acylhydrolase superfamily protein,[Source:TAIR;Acc:AT3G16370]	1.15953	1.11538
AT3G15180	AT3G15180_gene	ARM repeat superfamily protein,[Source:TAIR;Acc:AT3G15180]	1.17476	1.34231
AT1G29670	AT1G29670_gene	GDSL-like Lipase/Acylhydrolase superfamily protein,[Source:TAIR;Acc:AT1G29670]	1.23108	1.39146
NP_192985	AT4G12480_gene	pEARLI 1; lipid binding [Source:RefSeq peptide;Acc:NP_192985]	1.26409	1.04258
AT5G18630	AT5G18630_gene	alpha/beta-Hydrolases superfamily protein,[Source:TAIR;Acc:AT5G18630]	1.27519	-1.1661
AT5G51740	AT5G51740_gene	Peptidase family M48 family protein,[Source:TAIR;Acc:AT5G51740]	1.27879	1.12093
AT4G35770	SEN1_gene	Rhodanese/Cell cycle control phosphatase superfamily protein,[Source:TAIR;Acc:AT4G35770]	1.29067	1.24535
NP_192986	AT4G12490_gene	protease inhibitor/seed storage/lipid transfer protein (LTP) family protein [Source:RefSeq peptide;Acc:NP_192986]	1.30704	1.44086
AT1G49050	AT1G49050_gene	Eukaryotic aspartyl protease family protein,[Source:TAIR;Acc:AT1G49050]	1.3314	1.24012
AT5G66140	PAD2_gene	RADIATION SENSITIVE 17,[Source:TAIR;Acc:AT5G66130]	1.35315	1.44842
AT5G59320	LTP3_gene	lipid transfer protein 3,[Source:TAIR;Acc:AT5G59320]	1.36585	2.2
AT5G59320	LTP3_gene	lipid transfer protein 3,[Source:TAIR;Acc:AT5G59320]	1.36585	2.2
AT5G14180	MPL1_gene	Myzus persicae-induced lipase 1,[Source:TAIR;Acc:AT5G14180]	1.48485	1.61905
AT5G10380	RING1_gene	RING/U-box superfamily protein,[Source:TAIR;Acc:AT5G10380]	1.56604	1.98305
AT1G45201	ATTLL1_gene	triacylglycerol lipase-like 1,[Source:TAIR;Acc:AT1G45201]	1.62703	-1.13145
AT3G56400	WRKY70_gene	WRKY DNA-binding protein 70,[Source:TAIR;Acc:AT3G56400]	1.63636	-1.17143
NP_196707	AT5G11460_gene	senescence-associated protein-related [Source:RefSeq peptide;Acc:NP_196707]	1.72662	2.2459
AT3G28210	PMZ_gene	zinc finger (AN1-like) family protein,[Source:TAIR;Acc:AT3G28210]	1.975	1.34783
AT4G22470	AT4G22470_gene	protease inhibitor/seed storage/lipid transfer protein (LTP) family protein,[Source:TAIR;Acc:AT4G22470]	2.33333	1.79798
AT5G14930	SAG101_gene	senescence-associated gene 101,[Source:TAIR;Acc:AT5G14930]	2.9596	2.13699
AT2G38530	LTP2_gene	lipid transfer protein 2,[Source:TAIR;Acc:AT2G38530]	3.43082	1.85845
AT4G25140	nf
AT5G51210	nf
AT4G28520	nf
AT1G03880	nf
AT5G44120	nf
AT4G27140	nf
AT4G27150	nf
AT5G54740	nf
AT4G14630	nf
AT2G29350	nf
AT5G67360	nf
AT3G43960	nf
AT4G32940	nf
AT5G19120	nf
AT1G73260	nf
AT5G43580	nf
AT1G72060	nf
AT2G38870	nf
