# Supplementary material for: Responses to Telomere Erosion in Plants
Source: PLoS One. 2014 Jan 21;9(1):e86220. doi: 10.1371/journal.pone.0086220 (PMC3897657; doi:10.1371/journal.pone.0086220)
Supplement: Table S8 — Lists of genes belonging to the “mitochondrial genes” category. The relative induction is indicated for both RNA-seq experiments. (XLSX) [file pone.0086220.s009.xlsx]

## Sheet: Supl table 8 - mito
locus	Feature	Description	G7/wt set 1	G7/wt set 2
ATMG00070	NAD9_gene	NADH dehydrogenase subunit 9,[Source:TAIR;Acc:ATMG00070]	-2.85714	2.25
ATMG00360	ORF199_gene	a mitochondrion-encoded tRNA for cysteine,[Source:TAIR;Acc:ATMG00360]	-1.56818	1.04545
ATMG00020	RRN26_gene	mitochondrial 26S ribosomal RNA protein,[Source:TAIR;Acc:ATMG00020]	-1.53076	-1.96593
ATMG00060	NAD5C_gene	NADH dehydrogenase subunit 5C,[Source:TAIR;Acc:ATMG00060]	-1.44262	-1.02703
ATMG00516	NAD1C_gene	NADH dehydrogenase 1C,[Source:TAIR;Acc:ATMG00516]	-1.43939	1.20755
ATMG00516	MATR_gene	NADH dehydrogenase 1C,[Source:TAIR;Acc:ATMG00516]	-1.3617	1.29032
ATMG01390	RRN18_gene	Mitochondrial 18S ribosomal RNA, which is a component of the 30S small subunit of mitochondrial ribosome, The rRNA is degraded by a polynucleotide phosphorylase-like protein (AtmtPNPase),,[Source:TAIR;Acc:ATMG01390]	-1.33506	1.05828
ATMG00030	ORF107A_gene	hypothetical protein,[Source:TAIR;Acc:ATMG00030]	-1.32151	-1.25901
ATMG01320	NAD2B_gene	NADH dehydrogenase 2B,[Source:TAIR;Acc:ATMG01320]	-1.27333	1.11881
ATMG00040	ORF315_gene	ATP synthase subunit C family protein,[Source:TAIR;Acc:ATMG00040]	-1.27273	1.55556
ATMG01170	ATP6-2_gene	ATPase, F0 complex, subunit A protein,[Source:TAIR;Acc:ATMG01170]	-1.13043	1
ATMG01190	ATP1_gene	ATP synthase subunit 1,[Source:TAIR;Acc:ATMG01190]	-1.12821	1.19231
ATMG01080	ATP9_gene	mitochondrial F0-ATPase subunit 9,[Source:TAIR;Acc:ATMG01080]	-1.05714	1.5
ATMG00080	ATMG00090_gene	ribosomal protein L16,[Source:TAIR;Acc:ATMG00080]	-1.04774	1.0751
ATMG00510	NAD7_gene	NADH dehydrogenase subunit 7,[Source:TAIR;Acc:ATMG00510]	-1.03937	1.26633
ATMG00180	CCB452_gene	cytochrome C biogenesis 452,[Source:TAIR;Acc:ATMG00180]	1.05556	-1.16667
ATMG00580	NAD4_gene	NADH dehydrogenase subunit 4,[Source:TAIR;Acc:ATMG00580]	1.07333	1.01266
ATMG00560	RPL2_gene	Nucleic acid-binding, OB-fold-like protein,[Source:TAIR;Acc:ATMG00560]	1.11504	1.49153
ATMG00660	ORF149_gene	hypothetical protein,[Source:TAIR;Acc:ATMG00660]	1.18421	1.48387
ATMG00160	COX2_gene	cytochrome oxidase 2,[Source:TAIR;Acc:ATMG00160]	1.2	1.15385
ATMG00513	NAD5A_gene	NADH dehydrogenase 5A,[Source:TAIR;Acc:ATMG00513]	1.275	-1.02326
ATMG01380	RRN5_gene	Mitochondrial 5S ribosomal RNA, which is a component of the 50S large subunit of mitochondrial ribosome,,[Source:TAIR;Acc:ATMG01380]	1.42857	1.16667
ATMG01370	ORF111D_gene	hypothetical protein,[Source:TAIR;Acc:ATMG01370]	1.57143	1.36364
ATMG01360	COX1_gene	cytochrome oxidase,[Source:TAIR;Acc:ATMG01360]	1.59091	1.72727
ATMG00080	RPL16_gene	ribosomal protein L16,[Source:TAIR;Acc:ATMG00080]	1.88235	1.05882
ATMG00690	ORF240A_gene	hypothetical protein,[Source:TAIR;Acc:ATMG00690]	4.5	-1.41667
